# Supplementary material
Source: MDPI journal article supplement (https://www.mdpi.com/2073-4352/13/3/392)
Supplement: s1 [file s1]

# Solubility and crystallization studies of picolinic acid

## Supplementary Materials

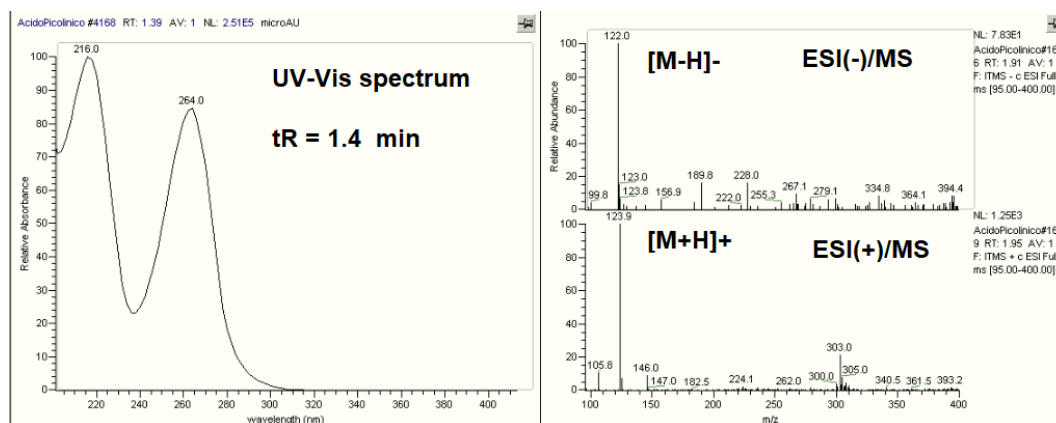

**Figure S1** - UV-Vis and ESI mass spectra, in the positive and negative modes of picolinic acid (PA).

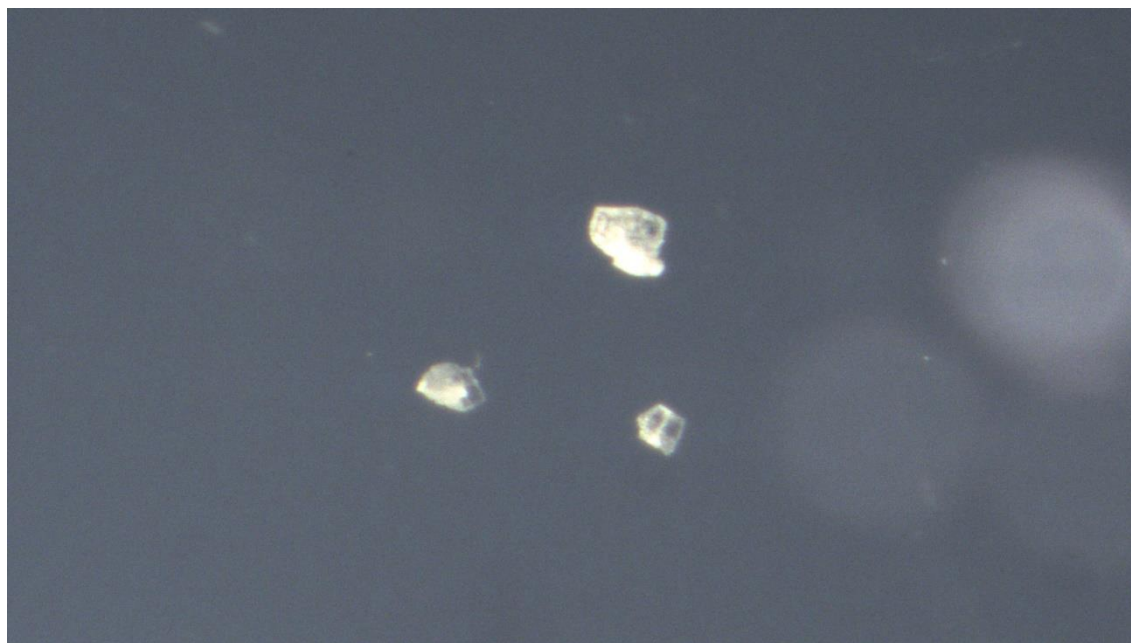

**Figure S2** –Microscope image of PA crystals obtained through sublimation using a cold finger.

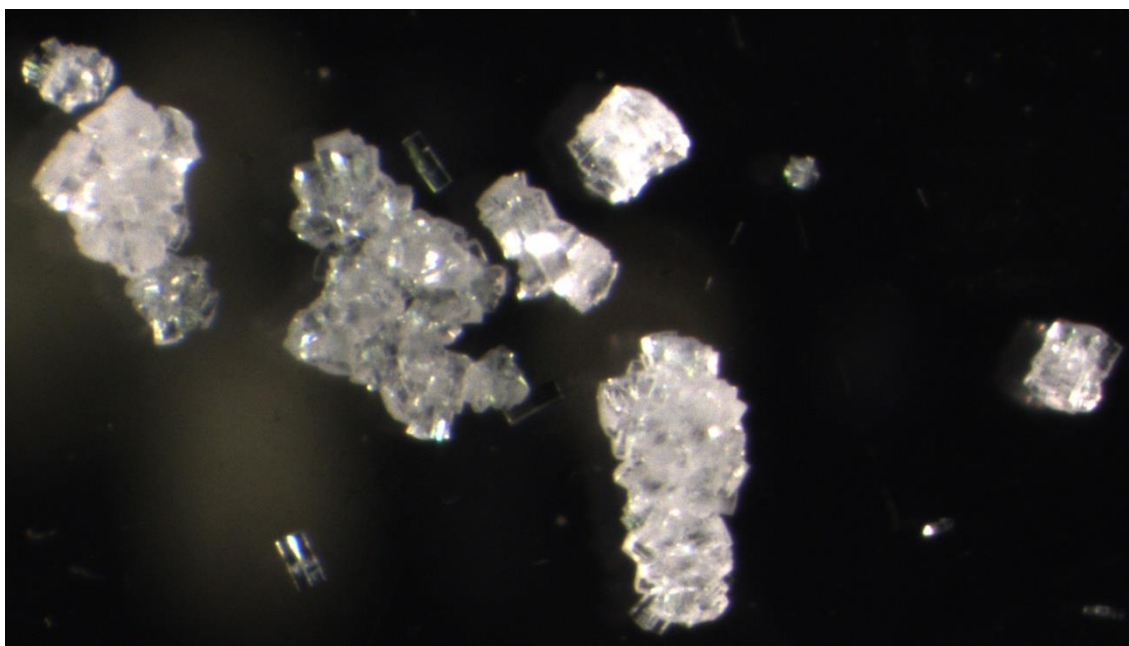

**Figure S3** – Microscope image of PA crystals obtained through sublimation on a Petri dish used for SCXRD.

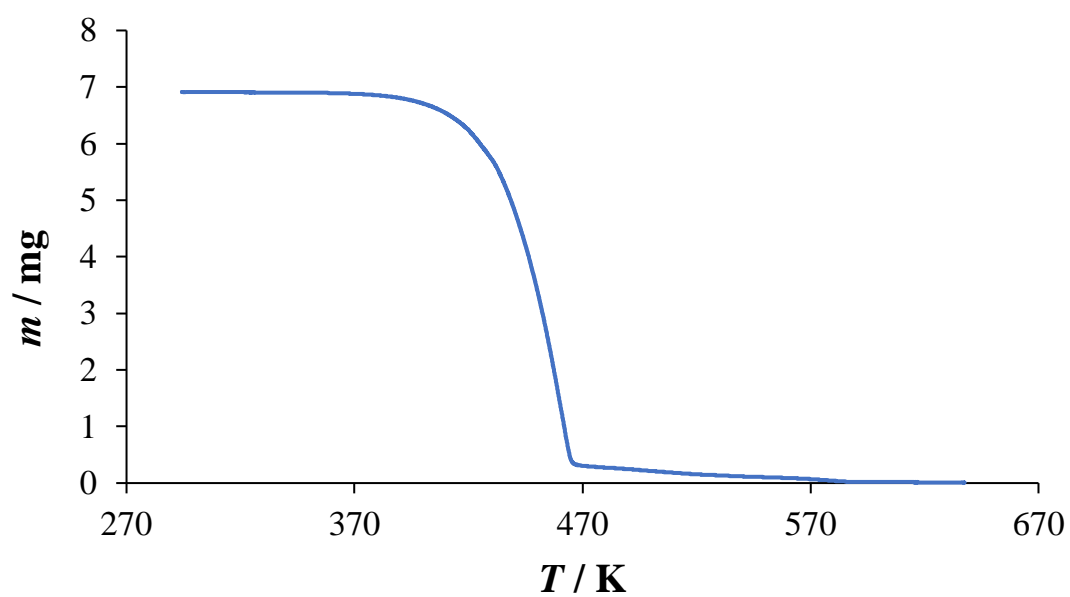

**Figure S4** – Thermogram obtained through the thermogravimetric analysis (TGA) of PA.

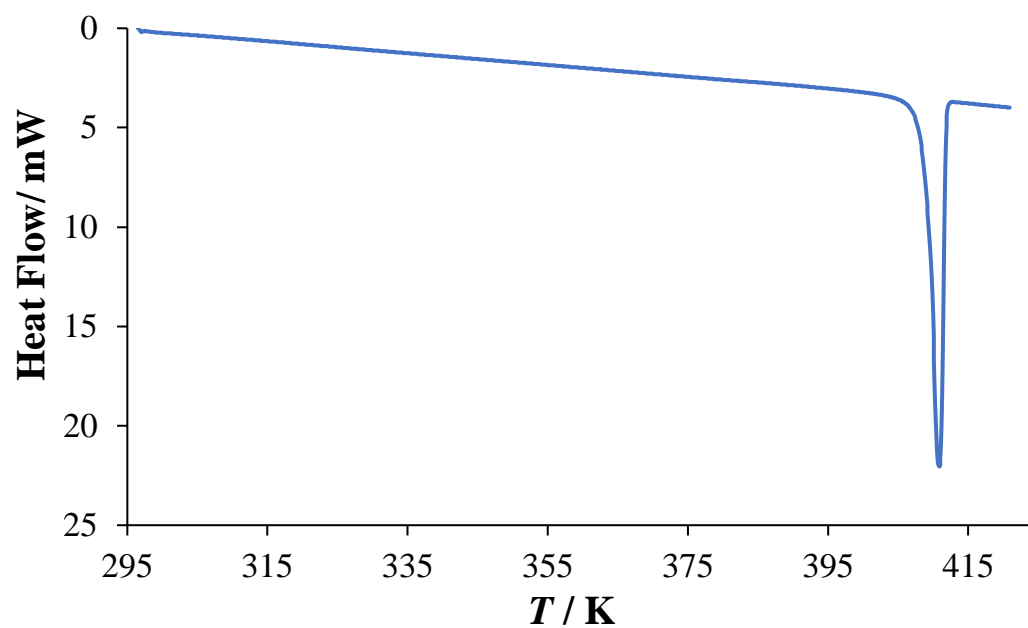

**Figure S5** - Thermogram obtained through differential scanning calorimetry (DSC) in the temperature range of 298 – 423 K of PA.

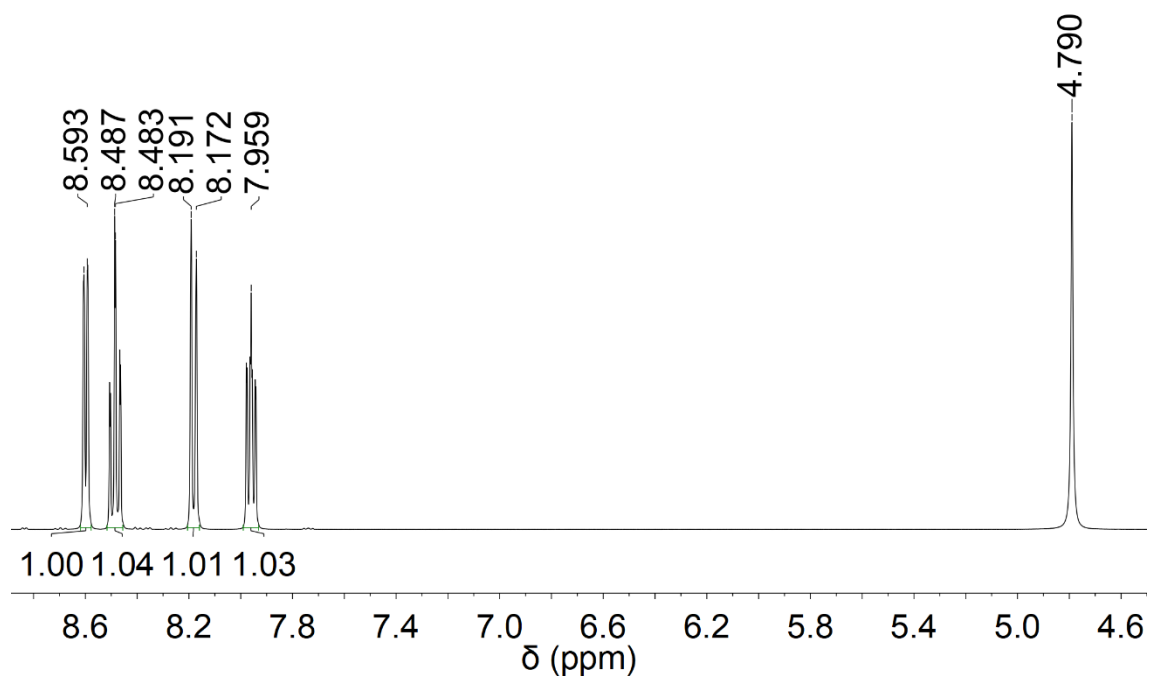

**Figure S6** <sup>1</sup>H-NMR spectrum of a solution of PA in D<sub>2</sub>O with a concentration of 126.28 g·kg<sup>-1</sup>.

**Table S1.** Provenance and mass fraction purity of the materials used in this work.

| Material       | CAS #   | Supplier            | Mass fraction purity |
|----------------|---------|---------------------|----------------------|
| Picolinic acid | 98-98-6 | Alfa Aesar          | 0.99999 <sup>a</sup> |
| Ethanol        | 64-17-5 | Carlo Erba Reagents | 0.999 <sup>b</sup>   |
| Acetonitrile   | 75-05-8 | Chem-Lab            | 0.999 <sup>b</sup>   |

<sup>a</sup> Mass fraction given by HPLC-ESI/MS analysis, after the purification procedure carried out in this work; <sup>b</sup> Given by the supplier.

**Table S2 -** Indexation of the X-ray Powder Diffraction Pattern of PA, as supplied, recorded at 298±2 K, in the range  $7^\circ \leq 2\theta \leq 35^\circ$ ; Crystal system: Monoclinic; Space group: C2/c;  $a = 21.2215 \text{ \AA}$ ,  $b = 3.8295 \text{ \AA}$ ,  $c = 13.9497 \text{ \AA}$ ,  $\beta = 108.08^\circ$ .

| $h$ | $k$ | $l$ | $2\theta(\text{Obs.}) / ^\circ$ | $2\theta(\text{Calc.}) / ^\circ$ |
|-----|-----|-----|---------------------------------|----------------------------------|
| 2   | 0   | 0   | 8.829                           | 8.760                            |
| -2  | 0   | 2   | 13.42                           | 13.50                            |
| 4   | 0   | 0   | 17.63                           | 17.57                            |
| -4  | 0   | 2   | 18.56                           | 18.49                            |
| 1   | 1   | 1   | 25.00                           | 24.95                            |
| -6  | 0   | 2   | 25.61                           | 25.70                            |
| -3  | 1   | 1   | 26.58                           | 26.58                            |
| -3  | 1   | 2   | 28.06                           | 28.07                            |
| -1  | 1   | 3   | 30.31                           | 30.27                            |
| -3  | 1   | 3   | 30.99                           | 31.03                            |
| -6  | 0   | 4   | 31.49                           | 31.45                            |
| 3   | 1   | 2   | 31.88                           | 31.86                            |
| 6   | 0   | 2   | 33.38                           | 33.39                            |
| -8  | 0   | 2   | 33.87                           | 33.86                            |
| 5   | 1   | 1   | 34.28                           | 34.34                            |
| 3   | 1   | 3   | 36.17                           | 36.17                            |
| 4   | 0   | 4   | 36.74                           | 36.74                            |

**Table S3-** Indexation of the X-ray Powder Diffraction Pattern of PA, obtained through sublimation using a cold finger, recorded at  $298 \pm 2$  K, in the range  $7^\circ \leq 2\theta \leq 35^\circ$ ; Crystal system: Monoclinic; Space group: C2/c;  $a = 21.2215$  Å,  $b = 3.8295$  Å,  $c = 13.9497$  Å,  $\beta = 108.08^\circ$ .

| h  | k | l | $2\theta(\text{Obs.}) / ^\circ$ | $2\theta(\text{Calc.}) / ^\circ$ |
|----|---|---|---------------------------------|----------------------------------|
| 2  | 0 | 0 | 8.835                           | 8.756                            |
| -2 | 0 | 2 | 13.42                           | 13.51                            |
| 4  | 0 | 0 | 17.62                           | 17.56                            |
| -4 | 0 | 2 | 18.56                           | 18.50                            |
| -1 | 1 | 1 | 24.24                           | 24.20                            |
| 1  | 1 | 1 | 24.99                           | 24.96                            |
| -3 | 1 | 1 | 26.60                           | 26.58                            |
| 0  | 0 | 4 | 26.91                           | 26.87                            |
| -3 | 1 | 2 | 28.07                           | 28.08                            |
| -1 | 1 | 3 | 30.28                           | 30.27                            |
| 2  | 0 | 4 | 30.85                           | 30.85                            |
| -3 | 1 | 3 | 31.05                           | 31.05                            |
| -6 | 0 | 4 | 31.46                           | 31.47                            |
| 3  | 1 | 2 | 31.88                           | 31.86                            |
| 6  | 0 | 2 | 33.36                           | 33.36                            |
| -8 | 0 | 2 | 33.85                           | 33.86                            |
| 5  | 1 | 1 | 34.23                           | 34.34                            |

**Table S4** – Solubility of the picolinic, nicotinic and isonicotinic acid isomers in water (H<sub>2</sub>O), ethanol (EtOH) and acetonitrile (MeCN) at 25 and 30 °C in mol·dm<sup>-3</sup>.

| Compound | <i>t</i> / °C | Solvent          | <i>c</i> / mol·dm <sup>-3</sup> | References |
|----------|---------------|------------------|---------------------------------|------------|
| PA       | 25            | H <sub>2</sub> O | 4.5620                          | This work  |
| NA       |               |                  | 0.1371                          | [1]        |
| IA       |               |                  | 0.0477                          | [2]        |
|          |               |                  | 0.0467                          | [3]        |
| PA       | 30            | H <sub>2</sub> O | 4.7982                          | This work  |
| NA       |               |                  | 0.1569                          | [2]        |
|          |               |                  | 0.1525                          | [1]        |
| IA       |               |                  | 0.0639                          | [2]        |
| PA       | 25            | EtOH             | 0.3785                          | This work  |
| NA       |               |                  | 0.0631                          | [1]        |
| IA       |               |                  | 0.0098                          | [3]        |
| PA       | 30            | EtOH             | 0.4745                          | This work  |
| NA       |               |                  | 0.0720                          | [1]        |
| PA       | 25            | MeCN             | 0.1417                          | This work  |
| NA       |               |                  | 0.0035                          | [1]        |
| PA       | 30            | MeCN             | 0.0298                          | This work  |
| NA       |               |                  | 0.0051                          | [1]        |

**Table S5** – Indexation of the X-ray Powder Diffraction Pattern of PA, in H<sub>2</sub>O at 293.15 K recorded at 298±2 K, in the range  $7^\circ \leq 2\theta \leq 35^\circ$ ; Crystal system: Monoclinic; Space group: C2/c;  $a = 21.2646 \text{ \AA}$ ,  $b = 3.8317 \text{ \AA}$ ,  $c = 13.9725 \text{ \AA}$ ,  $\beta = 107.97^\circ$ .

| $h$ | $k$ | $l$ | $2\theta(\text{Obs.}) / ^\circ$ | $2\theta(\text{Calc.}) / ^\circ$ |
|-----|-----|-----|---------------------------------|----------------------------------|
| 2   | 0   | 0   | 8.765                           | 8.736                            |
| 0   | 0   | 2   | 13.33                           | 13.31                            |
| 4   | 0   | 0   | 17.55                           | 17.52                            |
| -4  | 0   | 2   | 18.46                           | 18.47                            |
| 1   | 1   | 0   | 23.65                           | 23.61                            |
| -1  | 1   | 1   | 24.17                           | 24.18                            |
| 1   | 1   | 1   | 24.93                           | 24.93                            |
| 4   | 0   | 2   | 25.20                           | 25.18                            |
| -2  | 0   | 4   | 25.52                           | 25.48                            |
| -3  | 1   | 1   | 26.53                           | 26.55                            |
| 0   | 0   | 4   | 26.79                           | 26.81                            |
| -4  | 0   | 4   | 27.16                           | 27.17                            |
| 1   | 1   | 2   | 27.87                           | 27.88                            |
| -3  | 1   | 2   | 28.07                           | 28.05                            |
| -1  | 1   | 3   | 30.28                           | 30.23                            |
| 2   | 0   | 4   | 30.77                           | 30.78                            |
| -3  | 1   | 3   | 30.99                           | 31.01                            |
| -6  | 0   | 4   | 31.42                           | 31.41                            |
| 3   | 1   | 2   | 31.80                           | 31.80                            |
| 5   | 1   | 0   | 32.17                           | 32.15                            |
| 6   | 0   | 2   | 33.29                           | 33.28                            |
| -8  | 0   | 2   | 33.78                           | 33.79                            |
| 5   | 1   | 1   | 34.23                           | 34.28                            |

**Table S6** - Indexation of the X-ray Powder Diffraction Pattern of PA, in EtOH at 293.15 K recorded at 298±2 K, in the range  $7^\circ \leq 2\theta \leq 35^\circ$ ; Crystal system: Monoclinic; Space group: C2/c;  $a = 21.2048 \text{ \AA}$ ,  $b = 3.8293 \text{ \AA}$ ,  $c = 13.9294 \text{ \AA}$ ,  $\beta = 107.96^\circ$ .

| $h$ | $k$ | $l$ | $2\theta(\text{Obs.}) / ^\circ$ | $2\theta(\text{Calc.}) / ^\circ$ |
|-----|-----|-----|---------------------------------|----------------------------------|
| 0   | 0   | 2   | 13.40                           | 13.35                            |
| -4  | 0   | 2   | 18.56                           | 18.52                            |
| 4   | 0   | 2   | 25.30                           | 25.26                            |
| -3  | 1   | 1   | 26.60                           | 26.58                            |
| 0   | 0   | 4   | 26.86                           | 26.89                            |
| -4  | 0   | 4   | 27.24                           | 27.25                            |
| 1   | 1   | 2   | 27.90                           | 27.91                            |
| 3   | 1   | 1   | 28.66                           | 28.62                            |
| -3  | 1   | 3   | 31.08                           | 31.06                            |
| -6  | 0   | 4   | 31.50                           | 31.51                            |
| 3   | 1   | 2   | 31.88                           | 31.86                            |
| 5   | 1   | 0   | 32.23                           | 32.20                            |
| 6   | 0   | 2   | 33.38                           | 33.37                            |
| -8  | 0   | 2   | 33.89                           | 33.89                            |
| 5   | 1   | 1   | 34.24                           | 34.34                            |



**Table S7** - Indexation of the X-ray Powder Diffraction Pattern of PA, in MeCN at 293.15 K recorded at 298±2 K, in the range  $7^\circ \leq 2\theta \leq 35^\circ$ ; Crystal system: Monoclinic; Space group: C2/c;  $a=21.2451 \text{ \AA}$ ,  $b=3.8301 \text{ \AA}$ ,  $c=13.9532 \text{ \AA}$ ,  $\beta=108.02^\circ$ .

| $h$ | $k$ | $l$ | $2\theta(\text{Obs.}) / ^\circ$ | $2\theta(\text{Calc.}) / ^\circ$ |
|-----|-----|-----|---------------------------------|----------------------------------|
| 2   | 0   | 0   | 8.725                           | 8.734                            |
| 0   | 0   | 2   | 13.32                           | 13.30                            |
| 4   | 0   | 0   | 17.52                           | 17.52                            |
| -4  | 0   | 2   | 18.46                           | 18.46                            |
| 1   | 1   | 0   | 23.57                           | 23.59                            |
| -1  | 1   | 1   | 24.17                           | 24.15                            |
| 1   | 1   | 1   | 24.92                           | 24.91                            |
| 4   | 0   | 2   | 25.17                           | 25.18                            |
| -2  | 0   | 4   | 25.45                           | 25.47                            |
| -1  | 1   | 2   | 26.49                           | 26.49                            |
| 0   | 0   | 4   | 26.79                           | 26.79                            |
| -4  | 0   | 4   | 27.16                           | 27.15                            |
| 1   | 1   | 2   | 27.83                           | 27.85                            |
| -3  | 1   | 2   | 28.04                           | 28.03                            |
| 3   | 1   | 1   | 28.56                           | 28.56                            |
| -1  | 1   | 3   | 30.21                           | 30.21                            |
| 2   | 0   | 4   | 30.78                           | 30.77                            |
| -3  | 1   | 3   | 30.97                           | 30.98                            |
| -5  | 1   | 1   | 31.38                           | 31.38                            |
| 3   | 1   | 2   | 31.80                           | 31.78                            |
| 5   | 1   | 0   | 32.12                           | 32.13                            |
| 6   | 0   | 2   | 33.27                           | 33.27                            |
| -8  | 0   | 2   | 33.78                           | 33.78                            |
| -5  | 1   | 3   | 34.18                           | 34.18                            |

**Table S8** - Indexation of the X-ray Powder Diffraction Pattern of PA, in H<sub>2</sub>O at 298.15 K recorded at 298±2 K, in the range  $7^\circ \leq 2\theta \leq 35^\circ$ ; Crystal system: Monoclinic; Space group: C2/c;  $a = 21.2451 \text{ \AA}$ ,  $b = 3.8301 \text{ \AA}$ ,  $c = 13.9532 \text{ \AA}$ ,  $\beta = 108.02^\circ$ .

| $h$ | $k$ | $l$ | $2\theta(\text{Obs.}) / ^\circ$ | $2\theta(\text{Calc.}) / ^\circ$ |
|-----|-----|-----|---------------------------------|----------------------------------|
| 2   | 0   | 0   | 8.775                           | 8.747                            |
| 0   | 0   | 2   | 13.32                           | 13.34                            |
| 4   | 0   | 0   | 17.57                           | 17.55                            |
| -4  | 0   | 2   | 18.53                           | 18.48                            |
| -1  | 1   | 1   | 24.19                           | 24.19                            |
| 1   | 1   | 1   | 24.96                           | 24.94                            |
| 4   | 0   | 2   | 25.26                           | 25.23                            |
| -2  | 0   | 4   | 25.55                           | 25.52                            |
| -1  | 1   | 2   | 26.50                           | 26.53                            |
| 0   | 0   | 4   | 26.80                           | 26.86                            |
| -4  | 0   | 4   | 27.22                           | 27.19                            |
| -3  | 1   | 2   | 28.07                           | 28.07                            |
| -1  | 1   | 3   | 30.27                           | 30.26                            |
| 2   | 0   | 4   | 30.83                           | 30.84                            |
| -3  | 1   | 3   | 31.04                           | 31.03                            |
| -6  | 0   | 4   | 31.46                           | 31.44                            |
| 3   | 1   | 2   | 31.87                           | 31.84                            |
| 5   | 1   | 0   | 32.16                           | 32.18                            |
| 6   | 0   | 2   | 33.36                           | 33.33                            |
| -8  | 0   | 2   | 33.75                           | 33.82                            |
| -5  | 1   | 3   | 34.21                           | 34.22                            |

**Table S9**- Indexation of the X-ray Powder Diffraction Pattern of PA, in EtOH at 298.15 K recorded at 298±2 K, in the range  $7^\circ \leq 2\theta \leq 35^\circ$ ; Crystal system: Monoclinic; Space group C2/c;  $a=21.2469 \text{ \AA}$ ,  $b=3.8295 \text{ \AA}$ ,  $c=13.9557 \text{ \AA}$ ,  $\beta=108.97^\circ$ .

| $h$ | $k$ | $l$ | $2\theta(\text{Obs.}) / ^\circ$ | $2\theta(\text{Calc.}) / ^\circ$ |
|-----|-----|-----|---------------------------------|----------------------------------|
| 2   | 0   | 0   | 8.755                           | 8.744                            |
| 0   | 0   | 2   | 13.34                           | 13.33                            |
| 24  | 0   | 0   | 17.61                           | 17.54                            |
| -4  | 0   | 2   | 18.53                           | 18.48                            |
| 1   | 1   | 0   | 23.67                           | 23.63                            |
| -1  | 1   | 1   | 24.20                           | 24.19                            |
| 1   | 1   | 1   | 24.99                           | 24.95                            |
| -3  | 1   | 1   | 26.58                           | 26.57                            |
| 0   | 0   | 4   | 26.84                           | 26.84                            |
| -4  | 0   | 4   | 27.17                           | 27.20                            |
| 1   | 1   | 2   | 27.94                           | 27.90                            |
| 3   | 1   | 1   | 28.48                           | 28.60                            |
| -1  | 1   | 3   | 30.29                           | 30.26                            |
| 2   | 0   | 4   | 30.83                           | 30.82                            |
| -6  | 0   | 4   | 31.43                           | 31.44                            |
| 6   | 0   | 2   | 33.33                           | 33.31                            |
| -8  | 0   | 2   | 33.81                           | 33.82                            |
| 5   | 1   | 1   | 34.25                           | 34.30                            |

**Table S10** - Indexation of the X-ray Powder Diffraction Pattern of PA, in MeCN at 298.15 K recorded at 298±2 K, in the range  $7^\circ \leq 2\theta \leq 35^\circ$ ; Crystal system: Monoclinic; Space group C2/c;  $a=21.2800 \text{ \AA}$ ,  $b=3.8399 \text{ \AA}$ ,  $c=13.9944 \text{ \AA}$ ,  $\beta=107.94^\circ$ .

| $h$ | $k$ | $l$ | $2\theta(\text{Obs.}) / ^\circ$ | $2\theta(\text{Calc.}) / ^\circ$ |
|-----|-----|-----|---------------------------------|----------------------------------|
| 2   | 0   | 0   | 8.685                           | 8.728                            |
| 0   | 0   | 2   | 13.30                           | 13.29                            |
| 4   | 0   | 0   | 17.50                           | 17.51                            |
| -4  | 0   | 2   | 18.44                           | 18.45                            |
| 1   | 1   | 0   | 23.54                           | 23.56                            |
| -1  | 1   | 1   | 24.14                           | 24.13                            |
| 1   | 1   | 1   | 24.86                           | 24.88                            |
| 4   | 0   | 2   | 25.16                           | 25.15                            |
| -2  | 0   | 4   | 25.42                           | 25.44                            |
| -1  | 1   | 2   | 26.47                           | 26.46                            |
| 0   | 0   | 4   | 26.78                           | 26.76                            |
| -4  | 0   | 4   | 27.12                           | 27.13                            |
| 1   | 1   | 2   | 27.79                           | 27.82                            |
| -3  | 1   | 2   | 28.02                           | 28.00                            |
| -1  | 1   | 3   | 30.16                           | 30.17                            |
| 2   | 0   | 4   | 30.73                           | 30.73                            |
| -3  | 1   | 3   | 30.97                           | 30.95                            |
| -5  | 1   | 1   | 31.33                           | 31.35                            |
| 3   | 1   | 2   | 31.74                           | 31.74                            |
| -5  | 1   | 2   | 32.10                           | 32.06                            |
| 6   | 0   | 2   | 33.26                           | 33.23                            |
| -8  | 0   | 2   | 33.75                           | 33.77                            |
| -5  | 1   | 3   | 34.20                           | 34.15                            |

**Table S11** - Indexation of the X-ray Powder Diffraction Pattern of PA, in H<sub>2</sub>O at 303.15 K recorded at 298±2 K, in the range  $7^\circ \leq 2\theta \leq 35^\circ$ ; Crystal system: Monoclinic; Space group C2/c;  $a=21.2426 \text{ \AA}$ ,  $b=3.8353 \text{ \AA}$ ,  $c=13.9625 \text{ \AA}$ ,  $\beta=107.97^\circ$ .

| $h$ | $k$ | $l$ | $2\theta(\text{Obs.}) / ^\circ$ | $2\theta(\text{Calc.}) / ^\circ$ |
|-----|-----|-----|---------------------------------|----------------------------------|
| 2   | 0   | 0   | 8.735                           | 8.745                            |
| 0   | 0   | 2   | 13.35                           | 13.32                            |
| 4   | 0   | 0   | 17.47                           | 17.54                            |
| 2   | 0   | 2   | 18.09                           | 18.09                            |
| -4  | 0   | 2   | 18.51                           | 18.48                            |
| -1  | 1   | 1   | 24.21                           | 24.16                            |
| 1   | 1   | 1   | 24.88                           | 24.91                            |
| 4   | 0   | 2   | 25.22                           | 25.21                            |
| -2  | 0   | 4   | 25.48                           | 25.50                            |
| -3  | 1   | 1   | 26.51                           | 26.54                            |
| 3   | 1   | 0   | 26.73                           | 26.73                            |
| 0   | 0   | 4   | 26.82                           | 26.83                            |
| -4  | 0   | 4   | 27.19                           | 27.19                            |
| -3  | 1   | 2   | 28.05                           | 28.04                            |
| -1  | 1   | 3   | 30.20                           | 30.23                            |
| 2   | 0   | 4   | 30.81                           | 30.81                            |
| -3  | 1   | 3   | 31.04                           | 31.00                            |
| -5  | 1   | 1   | 31.39                           | 31.40                            |
| 3   | 1   | 2   | 31.82                           | 31.80                            |
| 6   | 0   | 2   | 33.34                           | 33.31                            |
| -8  | 0   | 2   | 33.85                           | 33.83                            |
| -5  | 1   | 3   | 34.19                           | 34.20                            |

**Table S12** - Indexation of the X-ray Powder Diffraction Pattern of PA, in EtOH at 303.15 K recorded at 298±2 K, in the range  $7^\circ \leq 2\theta \leq 35^\circ$ ; Crystal system: Monoclinic; Space group C2/c;  $a=21.2966 \text{ \AA}$ ,  $b=3.8373 \text{ \AA}$ ,  $c=13.9742 \text{ \AA}$ ,  $\beta=108.01^\circ$ .

| $h$ | $k$ | $l$ | $2\theta(\text{Obs.}) / ^\circ$ | $2\theta(\text{Calc.}) / ^\circ$ |
|-----|-----|-----|---------------------------------|----------------------------------|
| 2   | 0   | 0   | 8.740                           | 8.725                            |
| 0   | 0   | 2   | 13.31                           | 13.31                            |
| 4   | 0   | 0   | 17.51                           | 17.50                            |
| -4  | 0   | 2   | 18.43                           | 18.44                            |
| -1  | 1   | 1   | 24.14                           | 24.14                            |
| 1   | 1   | 1   | 24.92                           | 24.90                            |
| -6  | 0   | 0   | 26.37                           | 26.38                            |
| 3   | 1   | 0   | 26.73                           | 26.70                            |
| -4  | 0   | 4   | 27.14                           | 27.15                            |
| 1   | 1   | 2   | 27.91                           | 27.85                            |
| -3  | 1   | 2   | 28.00                           | 28.01                            |
| -1  | 1   | 3   | 30.19                           | 30.21                            |
| 2   | 0   | 4   | 30.82                           | 30.78                            |
| -3  | 1   | 3   | 30.93                           | 30.97                            |
| -5  | 1   | 1   | 31.31                           | 31.35                            |
| 3   | 1   | 2   | 31.77                           | 31.77                            |
| 6   | 0   | 2   | 33.21                           | 33.25                            |
| -8  | 0   | 2   | 33.79                           | 33.74                            |
| -5  | 1   | 3   | 34.17                           | 34.16                            |

**Table S13** - Indexation of the X-ray Powder Diffraction Pattern of PA, in MeCN at 303.15 K recorded at 298±2 K, in the range  $7^\circ \leq 2\theta \leq 35^\circ$ ; Crystal system: Monoclinic; Space group C2/c;  $a=21.2736 \text{ \AA}$ ,  $b=3.8401 \text{ \AA}$ ,  $c=13.9747 \text{ \AA}$ ,  $\beta=108.08^\circ$ .

| $h$ | $k$ | $l$ | $2\theta(\text{Obs.}) / ^\circ$ | $2\theta(\text{Calc.}) / ^\circ$ |
|-----|-----|-----|---------------------------------|----------------------------------|
| 2   | 0   | 0   | 8.695                           | 8.738                            |
| 4   | 0   | 0   | 17.49                           | 17.53                            |
| -4  | 0   | 2   | 18.44                           | 18.45                            |
| 1   | 1   | 0   | 23.53                           | 23.56                            |
| -1  | 1   | 1   | 24.10                           | 24.13                            |
| 1   | 1   | 1   | 24.82                           | 24.88                            |
| 4   | 0   | 2   | 25.18                           | 25.21                            |
| -6  | 0   | 0   | 26.44                           | 26.42                            |
| 3   | 1   | 0   | 26.76                           | 26.70                            |
| -4  | 0   | 4   | 27.13                           | 27.15                            |
| 1   | 1   | 2   | 27.93                           | 27.84                            |
| -3  | 1   | 2   | 28.03                           | 28.00                            |
| -1  | 1   | 3   | 30.17                           | 30.19                            |
| 2   | 0   | 4   | 30.84                           | 30.81                            |
| -5  | 1   | 1   | 31.36                           | 31.35                            |
| 3   | 1   | 2   | 31.76                           | 31.78                            |
| 6   | 0   | 2   | 33.31                           | 33.31                            |
| -8  | 0   | 2   | 33.79                           | 33.77                            |
| -5  | 1   | 3   | 34.16                           | 34.15                            |

**Table S14** - Indexation of the X-ray Powder Diffraction Pattern of PA, in H<sub>2</sub>O at 308.15 K recorded at 298±2 K, in the range  $7^\circ \leq 2\theta \leq 35^\circ$ ; Crystal system: Monoclinic; Space group C2/c;  $a=21.2620 \text{ \AA}$ ,  $b=3.8286 \text{ \AA}$ ,  $c=13.9528 \text{ \AA}$ ,  $\beta=107.99^\circ$ .

| $h$ | $k$ | $l$ | $2\theta(\text{Obs.}) / ^\circ$ | $2\theta(\text{Calc.}) / ^\circ$ |
|-----|-----|-----|---------------------------------|----------------------------------|
| 0   | 0   | 2   | 13.28                           | 13.33                            |
| -2  | 0   | 2   | 13.42                           | 13.50                            |
| 4   | 0   | 0   | 17.63                           | 17.52                            |
| -4  | 0   | 2   | 18.44                           | 18.47                            |
| 1   | 1   | 0   | 23.65                           | 23.63                            |
| 1   | 1   | 1   | 24.98                           | 24.95                            |
| 4   | 0   | 2   | 25.19                           | 25.20                            |
| -6  | 0   | 2   | 25.58                           | 25.66                            |
| -3  | 1   | 1   | 26.58                           | 26.57                            |
| 0   | 0   | 4   | 26.89                           | 26.85                            |
| -4  | 0   | 4   | 27.20                           | 27.19                            |
| 1   | 1   | 2   | 27.89                           | 27.90                            |
| -3  | 1   | 2   | 28.08                           | 28.07                            |
| -1  | 1   | 3   | 30.25                           | 30.27                            |
| 2   | 0   | 4   | 30.86                           | 30.82                            |
| -6  | 0   | 4   | 31.46                           | 31.43                            |
| 3   | 1   | 2   | 31.84                           | 31.83                            |
| 5   | 1   | 0   | 32.17                           | 32.16                            |
| 6   | 0   | 2   | 33.25                           | 33.29                            |
| -8  | 0   | 2   | 33.84                           | 33.78                            |
| 5   | 1   | 1   | 34.24                           | 34.29                            |



**Table S15** - Indexation of the X-ray Powder Diffraction Pattern of PA, in EtOH at 308.15 K recorded at 298±2 K, in the range  $7^\circ \leq 2\theta \leq 35^\circ$ ; Crystal system: Monoclinic; Space group C2/c;  $a=21.2445 \text{ \AA}$ ,  $b=3.8314 \text{ \AA}$ ,  $c=13.9553 \text{ \AA}$ ,  $\beta=108.00^\circ$ .

| $h$ | $k$ | $l$ | $2\theta(\text{Obs.}) / ^\circ$ | $2\theta(\text{Calc.}) / ^\circ$ |
|-----|-----|-----|---------------------------------|----------------------------------|
| 2   | 0   | 0   | 8.775                           | 8.746                            |
| 0   | 0   | 2   | 13.36                           | 13.33                            |
| 4   | 0   | 0   | 17.56                           | 17.54                            |
| -4  | 0   | 2   | 18.51                           | 18.48                            |
| 1   | 1   | 0   | 23.64                           | 23.62                            |
| -1  | 1   | 1   | 24.18                           | 24.18                            |
| 1   | 1   | 1   | 24.95                           | 24.94                            |
| 4   | 0   | 2   | 25.23                           | 25.22                            |
| -2  | 0   | 4   | 25.55                           | 25.52                            |
| -3  | 1   | 1   | 26.53                           | 26.56                            |
| 0   | 0   | 4   | 26.84                           | 26.85                            |
| -4  | 0   | 4   | 27.18                           | 27.19                            |
| 1   | 1   | 2   | 27.89                           | 27.89                            |
| -3  | 1   | 2   | 28.06                           | 28.06                            |
| 3   | 1   | 1   | 28.59                           | 28.59                            |
| -1  | 1   | 3   | 30.25                           | 30.25                            |
| 2   | 0   | 4   | 30.82                           | 30.83                            |
| -3  | 1   | 3   | 31.03                           | 31.02                            |
| -6  | 0   | 4   | 31.43                           | 31.44                            |
| 5   | 1   | 0   | 32.17                           | 32.17                            |
| 6   | 0   | 2   | 33.32                           | 33.32                            |
| -8  | 0   | 2   | 33.81                           | 33.82                            |
| 5   | 1   | 1   | 34.31                           | 34.30                            |

**Table S16** - Indexation of the X-ray Powder Diffraction Pattern of PA, in MeCN at 308.15 K recorded at 298±2 K, in the range  $7^\circ \leq 2\theta \leq 35^\circ$ ; Crystal system: Monoclinic; Space group C2/c;  $a=21.2368 \text{ \AA}$ ,  $b=3.8269 \text{ \AA}$ ,  $c=13.9427 \text{ \AA}$ ,  $\beta=108.03^\circ$ .

| $h$ | $k$ | $l$ | $2\theta(\text{Obs.}) / ^\circ$ | $2\theta(\text{Calc.}) / ^\circ$ |
|-----|-----|-----|---------------------------------|----------------------------------|
| 2   | 0   | 0   | 8.830                           | 8.751                            |
| -2  | 0   | 2   | 13.42                           | 13.51                            |
| 4   | 0   | 0   | 17.62                           | 17.55                            |
| -4  | 0   | 2   | 18.53                           | 18.49                            |
| 1   | 1   | 0   | 23.68                           | 23.64                            |
| -1  | 1   | 1   | 24.24                           | 24.21                            |
| 1   | 1   | 1   | 25.00                           | 24.97                            |
| -2  | 0   | 4   | 25.56                           | 25.54                            |
| -3  | 1   | 1   | 26.54                           | 26.59                            |
| 0   | 0   | 4   | 26.91                           | 26.88                            |
| -4  | 0   | 4   | 27.22                           | 27.21                            |
| -3  | 1   | 2   | 28.10                           | 28.09                            |
| 3   | 1   | 1   | 28.63                           | 28.62                            |
| -1  | 1   | 3   | 30.29                           | 30.28                            |
| 2   | 0   | 4   | 30.85                           | 30.86                            |
| -3  | 1   | 3   | 31.06                           | 31.05                            |
| -6  | 0   | 4   | 31.44                           | 31.45                            |
| 3   | 1   | 2   | 31.87                           | 31.86                            |
| 5   | 1   | 0   | 32.19                           | 32.20                            |
| 6   | 0   | 2   | 33.36                           | 33.35                            |
| -8  | 0   | 2   | 33.83                           | 33.83                            |
| 5   | 1   | 1   | 34.24                           | 34.34                            |

**Table S17** - Indexation of the X-ray Powder Diffraction Pattern of PA, in H<sub>2</sub>O at 313.15 K recorded at 298±2 K, in the range  $7^\circ \leq 2\theta \leq 35^\circ$ ; Crystal system: Monoclinic; Space group C2/c;  $a=21.2676 \text{ \AA}$ ,  $b=3.8351 \text{ \AA}$ ,  $c=13.9517 \text{ \AA}$ ,  $\beta=108.02^\circ$ .

| $h$ | $k$ | $l$ | $2\theta(\text{Obs.}) / ^\circ$ | $2\theta(\text{Calc.}) / ^\circ$ |
|-----|-----|-----|---------------------------------|----------------------------------|
| 2   | 0   | 0   | 8.770                           | 8.738                            |
| 0   | 0   | 2   | 13.37                           | 13.34                            |
| 4   | 0   | 0   | 17.57                           | 17.53                            |
| -4  | 0   | 2   | 18.50                           | 18.47                            |
| -1  | 1   | 1   | 24.20                           | 24.16                            |
| 1   | 1   | 1   | 24.95                           | 24.91                            |
| 4   | 0   | 2   | 25.25                           | 25.21                            |
| -2  | 0   | 4   | 25.52                           | 25.52                            |
| -3  | 1   | 1   | 26.52                           | 26.53                            |
| 3   | 1   | 0   | 26.65                           | 26.72                            |
| 0   | 0   | 4   | 26.86                           | 26.86                            |
| -4  | 0   | 4   | 27.20                           | 27.19                            |
| 1   | 1   | 2   | 27.88                           | 27.87                            |
| -3  | 1   | 2   | 28.06                           | 28.04                            |
| -1  | 1   | 3   | 30.26                           | 30.24                            |
| 2   | 0   | 4   | 30.82                           | 30.84                            |
| -6  | 0   | 4   | 31.40                           | 31.42                            |
| 3   | 1   | 2   | 31.80                           | 31.81                            |
| 6   | 0   | 2   | 33.29                           | 33.31                            |
| -8  | 0   | 2   | 33.78                           | 33.79                            |
| -5  | 1   | 3   | 34.17                           | 34.19                            |

**Table S18** - Indexation of the X-ray Powder Diffraction Pattern of PA, in EtOH at 313.15 K recorded at 298±2 K, in the range  $7^\circ \leq 2\theta \leq 35^\circ$ ; Crystal system: Monoclinic; Space group C2/c;  $a=21.2598 \text{ \AA}$ ,  $b=3.8370 \text{ \AA}$ ,  $c=13.9720 \text{ \AA}$ ,  $\beta=108.02^\circ$ .

| $h$ | $k$ | $l$ | $2\theta(\text{Obs.}) / ^\circ$ | $2\theta(\text{Calc.}) / ^\circ$ |
|-----|-----|-----|---------------------------------|----------------------------------|
| 2   | 0   | 0   | 8.765                           | 8.739                            |
| 0   | 0   | 2   | 13.33                           | 13.32                            |
| 4   | 0   | 0   | 17.55                           | 17.53                            |
| -4  | 0   | 2   | 18.49                           | 18.47                            |
| 1   | 1   | 0   | 23.56                           | 23.58                            |
| -1  | 1   | 1   | 24.16                           | 24.15                            |
| 1   | 1   | 1   | 24.91                           | 24.90                            |
| 4   | 0   | 2   | 25.21                           | 25.20                            |
| -2  | 0   | 4   | 25.50                           | 25.49                            |
| -1  | 1   | 2   | 26.48                           | 26.48                            |
| 0   | 0   | 4   | 26.82                           | 26.81                            |
| -4  | 0   | 4   | 27.16                           | 27.17                            |
| 1   | 1   | 2   | 27.81                           | 27.85                            |
| -3  | 1   | 2   | 28.03                           | 28.02                            |
| 3   | 1   | 1   | 28.59                           | 28.55                            |
| -1  | 1   | 3   | 30.21                           | 30.21                            |
| 2   | 0   | 4   | 30.79                           | 30.79                            |
| -3  | 1   | 3   | 30.99                           | 30.98                            |
| -6  | 0   | 4   | 31.39                           | 31.41                            |
| 3   | 1   | 2   | 31.80                           | 31.79                            |
| 5   | 1   | 0   | 32.12                           | 32.13                            |
| 6   | 0   | 2   | 33.28                           | 33.29                            |
| -8  | 0   | 2   | 33.79                           | 33.80                            |
| -5  | 1   | 3   | 34.20                           | 34.18                            |

**Table S19** - Indexation of the X-ray Powder Diffraction Pattern of PA, in MeCN at 313.15 K recorded at 298±2 K, in the range  $7^\circ \leq 2\theta \leq 35^\circ$ ; Crystal system: Monoclinic; Space group C2/c;  $a=21.2165 \text{ \AA}$ ,  $b=3.8285 \text{ \AA}$ ,  $c=13.9368 \text{ \AA}$ ,  $\beta=107.96^\circ$ .

| $h$ | $k$ | $l$ | $2\theta(\text{Obs.}) / ^\circ$ | $2\theta(\text{Calc.}) / ^\circ$ |
|-----|-----|-----|---------------------------------|----------------------------------|
| 2   | 0   | 0   | 8.825                           | 8.756                            |
| 0   | 0   | 2   | 13.40                           | 13.35                            |
| 4   | 0   | 0   | 17.62                           | 17.56                            |
| -4  | 0   | 2   | 18.54                           | 18.51                            |
| 1   | 1   | 0   | 23.63                           | 23.63                            |
| -1  | 1   | 1   | 24.24                           | 24.20                            |
| 1   | 1   | 1   | 24.99                           | 24.96                            |
| 4   | 0   | 2   | 25.26                           | 25.24                            |
| -3  | 1   | 1   | 26.56                           | 26.59                            |
| 0   | 0   | 4   | 26.88                           | 26.88                            |
| -4  | 0   | 4   | 27.22                           | 27.24                            |
| 1   | 1   | 2   | 27.91                           | 27.92                            |
| -3  | 1   | 2   | 28.12                           | 28.09                            |
| 3   | 1   | 1   | 28.64                           | 28.62                            |
| 2   | 0   | 4   | 30.84                           | 30.86                            |
| -3  | 1   | 3   | 31.06                           | 31.06                            |
| -6  | 0   | 4   | 31.49                           | 31.49                            |
| 3   | 1   | 2   | 31.88                           | 31.85                            |
| 5   | 1   | 0   | 32.20                           | 32.20                            |
| 6   | 0   | 2   | 33.37                           | 33.35                            |
| -8  | 0   | 2   | 33.85                           | 33.87                            |
| 5   | 1   | 1   | 34.23                           | 34.33                            |

**Table S20** - Indexation of the X-ray Powder Diffraction Pattern of PA, in toluene at 313.15 K recorded at 298±2 K, in the range  $7^\circ \leq 2\theta \leq 35^\circ$ ; Crystal system: Monoclinic; Space group C2/c;  $a=21.2334 \text{ \AA}$ ,  $b=3.8324 \text{ \AA}$ ,  $c=13.9707 \text{ \AA}$ ,  $\beta=108.02^\circ$ .

| $h$ | $k$ | $l$ | $2\theta(\text{Obs.}) / ^\circ$ | $2\theta(\text{Calc.}) / ^\circ$ |
|-----|-----|-----|---------------------------------|----------------------------------|
| 2   | 0   | 0   | 8.790                           | 8.752                            |
| 0   | 0   | 2   | 13.37                           | 13.32                            |
| 4   | 0   | 0   | 17.57                           | 17.55                            |
| -4  | 0   | 2   | 18.50                           | 18.48                            |
| 1   | 1   | 0   | 23.60                           | 23.61                            |
| -1  | 1   | 1   | 24.21                           | 24.17                            |
| 1   | 1   | 1   | 24.97                           | 24.93                            |
| 4   | 0   | 2   | 25.23                           | 25.23                            |
| -3  | 1   | 1   | 26.52                           | 26.56                            |
| 3   | 1   | 0   | 26.76                           | 26.75                            |
| -4  | 0   | 4   | 27.17                           | 27.17                            |
| 1   | 1   | 2   | 27.83                           | 27.88                            |
| -3  | 1   | 2   | 28.06                           | 28.05                            |
| -1  | 1   | 3   | 30.26                           | 30.23                            |
| 2   | 0   | 4   | 30.78                           | 30.81                            |
| -3  | 1   | 3   | 31.04                           | 31.00                            |
| -6  | 0   | 4   | 31.43                           | 31.42                            |
| 3   | 1   | 2   | 31.82                           | 31.82                            |
| 5   | 1   | 0   | 32.15                           | 32.17                            |
| 6   | 0   | 2   | 33.33                           | 33.33                            |
| -8  | 0   | 2   | 33.84                           | 33.84                            |
| -5  | 1   | 3   | 34.19                           | 34.21                            |

**Table S21** - Indexation of the X-ray Powder Diffraction Pattern of PA, in cyclohexane at 313.15 K recorded at 298±2 K, in the range  $7^\circ \leq 2\theta \leq 35^\circ$ ; Crystal system: Monoclinic; Space group C2/c;  $a = 21.2472 \text{ \AA}$ ,  $b = 3.8349 \text{ \AA}$ ,  $c = 13.9574 \text{ \AA}$ ,  $\beta = 107.95^\circ$ .

| $h$ | $k$ | $l$ | $2\theta(\text{Obs.}) / ^\circ$ | $2\theta(\text{Calc.}) / ^\circ$ |
|-----|-----|-----|---------------------------------|----------------------------------|
| 2   | 0   | 0   | 8.785                           | 8.742                            |
| 0   | 0   | 2   | 13.36                           | 13.33                            |
| 4   | 0   | 0   | 17.56                           | 17.54                            |
| -4  | 0   | 2   | 18.48                           | 18.49                            |
| 1   | 1   | 0   | 23.63                           | 23.59                            |
| -1  | 1   | 1   | 24.19                           | 24.16                            |
| 1   | 1   | 1   | 24.92                           | 24.91                            |
| 4   | 0   | 2   | 25.21                           | 25.20                            |
| -2  | 0   | 4   | 25.55                           | 25.51                            |
| -3  | 1   | 1   | 26.51                           | 26.54                            |
| 0   | 0   | 4   | 26.82                           | 26.84                            |
| -4  | 0   | 4   | 27.19                           | 27.20                            |
| 1   | 1   | 2   | 27.85                           | 27.87                            |
| -3  | 1   | 2   | 28.07                           | 28.04                            |
| -1  | 1   | 3   | 30.21                           | 30.23                            |
| 2   | 0   | 4   | 30.80                           | 30.81                            |
| -3  | 1   | 3   | 31.02                           | 31.01                            |
| -6  | 0   | 4   | 31.44                           | 31.45                            |
| 3   | 1   | 2   | 31.81                           | 31.80                            |
| 5   | 1   | 0   | 32.16                           | 32.15                            |
| 6   | 0   | 2   | 33.31                           | 33.30                            |
| -8  | 0   | 2   | 33.82                           | 33.82                            |
| 5   | 1   | 1   | 34.23                           | 34.28                            |

**Table S22** - Indexation of the X-ray Powder Diffraction Pattern of PA, in H<sub>2</sub>O at 318.15 K recorded at 298±2 K, in the range  $7^\circ \leq 2\theta \leq 35^\circ$ ; Crystal system: Monoclinic; Space group C2/c;  $a=21.2605 \text{ \AA}$ ,  $b=3.8304 \text{ \AA}$ ,  $c=13.9365 \text{ \AA}$ ,  $\beta=108.04^\circ$ .

| $h$ | $k$ | $l$ | $2\theta(\text{Obs.}) / ^\circ$ | $2\theta(\text{Calc.}) / ^\circ$ |
|-----|-----|-----|---------------------------------|----------------------------------|
| 2   | 0   | 0   | 8.810                           | 8.741                            |
| -2  | 0   | 2   | 13.40                           | 13.35                            |
| 4   | 0   | 0   | 17.49                           | 17.53                            |
| -4  | 0   | 2   | 18.13                           | 18.13                            |
| 1   | 1   | 0   | 18.51                           | 18.48                            |
| -1  | 1   | 1   | 23.63                           | 23.62                            |
| 1   | 1   | 1   | 24.20                           | 24.19                            |
| -2  | 0   | 4   | 24.96                           | 24.95                            |
| -3  | 1   | 1   | 25.26                           | 25.24                            |
| 0   | 0   | 4   | 25.53                           | 25.55                            |
| -4  | 0   | 4   | 26.54                           | 26.56                            |
| -3  | 1   | 2   | 26.75                           | 26.75                            |
| 3   | 1   | 1   | 26.89                           | 26.89                            |
| -1  | 1   | 3   | 27.22                           | 27.21                            |
| 2   | 0   | 4   | 27.90                           | 27.91                            |
| -3  | 1   | 3   | 28.08                           | 28.07                            |
| -6  | 0   | 4   | 30.25                           | 30.27                            |
| 3   | 1   | 2   | 30.86                           | 30.87                            |
| 5   | 1   | 0   | 31.46                           | 31.44                            |
| 6   | 0   | 2   | 31.87                           | 31.84                            |
| -8  | 0   | 2   | 33.34                           | 33.33                            |
| 5   | 1   | 1   | 33.78                           | 33.80                            |
| -5  | 1   | 3   | 34.22                           | 34.22                            |



**Table S23-** Indexation of the X-ray Powder Diffraction Pattern of PA, in EtOH at 318.15 K recorded at 298±2 K, in the range  $7^\circ \leq 2\theta \leq 35^\circ$ ; Crystal system: Monoclinic; Space group C2/c;  $a=21.1969 \text{ \AA}$ ,  $b=3.8276 \text{ \AA}$ ,  $c=13.9535 \text{ \AA}$ ,  $\beta=107.93^\circ$ .

| $h$ | $k$ | $l$ | $2\theta(\text{Obs.}) / ^\circ$ | $2\theta(\text{Calc.}) / ^\circ$ |
|-----|-----|-----|---------------------------------|----------------------------------|
| 2   | 0   | 0   | 8.720                           | 8.762                            |
| 0   | 0   | 2   | 13.31                           | 13.33                            |
| -2  | 0   | 2   | 13.45                           | 13.51                            |
| -4  | 0   | 2   | 18.56                           | 18.52                            |
| 1   | 1   | 0   | 23.67                           | 23.64                            |
| 1   | 1   | 1   | 24.95                           | 24.96                            |
| -3  | 1   | 1   | 26.58                           | 26.60                            |
| 0   | 0   | 4   | 26.82                           | 26.84                            |
| -4  | 0   | 4   | 27.23                           | 27.22                            |
| -1  | 1   | 3   | 30.29                           | 30.27                            |
| 2   | 0   | 4   | 30.85                           | 30.82                            |
| -6  | 0   | 4   | 31.50                           | 31.49                            |
| 3   | 1   | 2   | 31.88                           | 31.85                            |
| 6   | 0   | 2   | 33.38                           | 33.36                            |
| 5   | 1   | 1   | 34.29                           | 34.34                            |

**Table S24** - Indexation of the X-ray Powder Diffraction Pattern of PA, in MeCN at 318.15 K recorded at 298±2 K, in the range  $7^\circ \leq 2\theta \leq 35^\circ$ ; Crystal system: Monoclinic; Space group C2/c;  $a=21.3248 \text{ \AA}$ ,  $b=3.8414 \text{ \AA}$ ,  $c=13.982 \text{ \AA}$ ,  $\beta=108.26^\circ$ .

| $h$ | $k$ | $l$ | $2\theta(\text{Obs.}) / ^\circ$ | $2\theta(\text{Calc.}) / ^\circ$ |
|-----|-----|-----|---------------------------------|----------------------------------|
| 2   | 0   | 0   | 8.645                           | 8.726                            |
| -4  | 0   | 2   | 18.37                           | 18.40                            |
| 1   | 1   | 0   | 23.54                           | 23.55                            |
| -1  | 1   | 1   | 24.08                           | 24.12                            |
| 1   | 1   | 1   | 24.83                           | 24.88                            |
| -6  | 0   | 0   | 26.40                           | 26.39                            |
| 3   | 1   | 0   | 26.69                           | 26.68                            |
| 0   | 0   | 4   | 26.77                           | 26.84                            |
| -4  | 0   | 4   | 27.11                           | 27.09                            |
| 1   | 1   | 2   | 27.95                           | 27.84                            |
| -1  | 1   | 3   | 30.13                           | 30.19                            |
| 2   | 0   | 4   | 30.89                           | 30.84                            |
| -3  | 1   | 3   | 30.98                           | 30.92                            |
| -5  | 1   | 1   | 31.31                           | 31.31                            |
| 3   | 1   | 2   | 31.79                           | 31.79                            |
| -5  | 1   | 3   | 34.13                           | 34.09                            |

**Table S25** - Indexation of the X-ray Powder Diffraction Pattern of PA, in H<sub>2</sub>O at 323.15 K recorded at 298±2 K, in the range  $7^\circ \leq 2\theta \leq 35^\circ$ ; Crystal system: Monoclinic; Space group C2/c;  $a=21.2426 \text{ \AA}$ ,  $b=3.8353 \text{ \AA}$ ,  $c=13.9625 \text{ \AA}$ ,  $\beta=107.97^\circ$ .

| $h$ | $k$ | $l$ | $2\theta(\text{Obs.}) / ^\circ$ | $2\theta(\text{Calc.}) / ^\circ$ |
|-----|-----|-----|---------------------------------|----------------------------------|
| 2   | 0   | 0   | 8.735                           | 8.745                            |
| 0   | 0   | 2   | 13.35                           | 13.32                            |
| 4   | 0   | 0   | 17.47                           | 17.54                            |
| 2   | 0   | 2   | 18.09                           | 18.09                            |
| -4  | 0   | 2   | 18.51                           | 18.48                            |
| -1  | 1   | 1   | 24.21                           | 24.16                            |
| 1   | 1   | 1   | 24.88                           | 24.91                            |
| 4   | 0   | 2   | 25.22                           | 25.21                            |
| -2  | 0   | 4   | 25.48                           | 25.50                            |
| -3  | 1   | 1   | 26.51                           | 26.54                            |
| 3   | 1   | 0   | 26.73                           | 26.73                            |
| 0   | 0   | 4   | 26.82                           | 26.83                            |
| -4  | 0   | 4   | 27.19                           | 27.19                            |
| -3  | 1   | 2   | 28.05                           | 28.04                            |
| -1  | 1   | 3   | 30.20                           | 30.23                            |
| 2   | 0   | 4   | 30.81                           | 30.81                            |
| -3  | 1   | 3   | 31.04                           | 31.00                            |
| -5  | 1   | 1   | 31.39                           | 31.40                            |
| 3   | 1   | 2   | 31.82                           | 31.80                            |
| 6   | 0   | 2   | 33.34                           | 33.31                            |
| -8  | 0   | 2   | 33.85                           | 33.83                            |
| -5  | 1   | 3   | 34.19                           | 34.20                            |

**Table S26** - Indexation of the X-ray Powder Diffraction Pattern of PA, in EtOH at 323.15 K recorded at 298±2 K, in the range  $7^\circ \leq 2\theta \leq 35^\circ$ ; Crystal system: Monoclinic; Space group C2/c;  $a=21.2484 \text{ \AA}$ ,  $b=3.8323 \text{ \AA}$ ,  $c=13.9589 \text{ \AA}$ ,  $\beta=107.97^\circ$ .

| $h$ | $k$ | $l$ | $2\theta(\text{Obs.}) / ^\circ$ | $2\theta(\text{Calc.}) / ^\circ$ |
|-----|-----|-----|---------------------------------|----------------------------------|
| 2   | 0   | 0   | 8.795                           | 8.743                            |
| 0   | 0   | 2   | 13.36                           | 13.33                            |
| 4   | 0   | 0   | 17.58                           | 17.54                            |
| -4  | 0   | 2   | 18.49                           | 18.48                            |
| 1   | 1   | 0   | 23.62                           | 23.61                            |
| -1  | 1   | 1   | 24.20                           | 24.18                            |
| 1   | 1   | 1   | 24.94                           | 24.93                            |
| 4   | 0   | 2   | 25.22                           | 25.21                            |
| -3  | 1   | 1   | 26.54                           | 26.56                            |
| 3   | 1   | 0   | 26.75                           | 26.74                            |
| 0   | 0   | 4   | 26.85                           | 26.84                            |
| -4  | 0   | 4   | 27.20                           | 27.19                            |
| 1   | 1   | 2   | 27.87                           | 27.88                            |
| -3  | 1   | 2   | 28.05                           | 28.05                            |
| 3   | 1   | 1   | 28.59                           | 28.58                            |
| -1  | 1   | 3   | 30.25                           | 30.24                            |
| 2   | 0   | 4   | 30.78                           | 30.81                            |
| -3  | 1   | 3   | 31.02                           | 31.02                            |
| -6  | 0   | 4   | 31.45                           | 31.44                            |
| 3   | 1   | 2   | 31.81                           | 31.82                            |
| 5   | 1   | 0   | 32.15                           | 32.16                            |
| 6   | 0   | 2   | 33.30                           | 33.31                            |
| -8  | 0   | 2   | 33.80                           | 33.82                            |
| -5  | 1   | 3   | 34.20                           | 34.22                            |

**Table S27** - Indexation of the X-ray Powder Diffraction Pattern of PA, in MeCN at 323.15 K recorded at 298±2 K, in the range  $7^\circ \leq 2\theta \leq 35^\circ$ ; Crystal system: Monoclinic; Space group C2/c;  $a=21.1984 \text{ \AA}$ ,  $b=3.8264 \text{ \AA}$ ,  $c=13.9548 \text{ \AA}$ ,  $\beta=107.96^\circ$ .

| $h$ | $k$ | $l$ | $2\theta(\text{Obs.}) / ^\circ$ | $2\theta(\text{Calc.}) / ^\circ$ |
|-----|-----|-----|---------------------------------|----------------------------------|
| 2   | 0   | 0   | 8.830                           | 8.763                            |
| -2  | 0   | 2   | 13.41                           | 13.51                            |
| 4   | 0   | 0   | 17.62                           | 17.58                            |
| -4  | 0   | 2   | 18.56                           | 18.52                            |
| 1   | 1   | 0   | 23.66                           | 23.65                            |
| -1  | 1   | 1   | 24.24                           | 24.21                            |
| 1   | 1   | 1   | 24.98                           | 24.97                            |
| 4   | 0   | 2   | 25.27                           | 25.24                            |
| -3  | 1   | 1   | 26.57                           | 26.60                            |
| 0   | 0   | 4   | 26.82                           | 26.84                            |
| -4  | 0   | 4   | 27.23                           | 27.21                            |
| 1   | 1   | 2   | 27.94                           | 27.92                            |
| 3   | 1   | 1   | 28.66                           | 28.63                            |
| -1  | 1   | 3   | 30.30                           | 30.27                            |
| 2   | 0   | 4   | 30.85                           | 30.83                            |
| -3  | 1   | 3   | 31.08                           | 31.05                            |
| -6  | 0   | 4   | 31.50                           | 31.48                            |
| 3   | 1   | 2   | 31.83                           | 31.86                            |
| 5   | 1   | 0   | 32.23                           | 32.22                            |
| 6   | 0   | 2   | 33.37                           | 33.36                            |
| -8  | 0   | 2   | 33.88                           | 33.90                            |
| 5   | 1   | 1   | 34.25                           | 34.35                            |

## References:

- [1] Gonçalves, E.M.; Minas da Piedade, M.E. *J. Chem. Thermodynamics* 2012, 47, 362–371.
- [2] Katscher, E.; Moroz, W. *Process for the separation of nicotinic and isonicotinic acid* US Patent, US3147269A, International Chemical Corp, New York, 1964.
- [3] Abraham, M.H.; Acree, W.E. *J. Chem. Thermodynamics* **2013**, 61, 74–78.
