# Supplementary material
Source: MDPI journal article supplement (https://www.mdpi.com/2073-4352/13/3/392)
Supplement: s1 [file s1]

Archive with 3 entries (3 files):
- 20210526_ds_150k_0m_a.cif
- 20210526_ds_150k_0m_a_checkcif.pdf
- Solubility and crystallization studies of picolinic acid Supplementary Materials.pdf
