# Supplementary material
Source: MDPI journal article supplement (https://www.mdpi.com/2073-4352/13/3/392)
Supplement: s1 [file s1 › 20210526_ds_150k_0m_a.cif]

 
data_shelx
 
_audit_creation_method            'SHELXL-2018/3'
_shelx_SHELXL_version_number      '2018/3'
_chemical_name_systematic         ?
_chemical_name_common             ?
_chemical_melting_point           ?
_chemical_formula_moiety          ?
_chemical_formula_sum
 'C6 H5 N O2' 
_chemical_formula_weight          123.11

loop_
 _atom_type_symbol
 _atom_type_description
 _atom_type_scat_dispersion_real
 _atom_type_scat_dispersion_imag
 _atom_type_scat_source
 'C'  'C'   0.0033   0.0016
 'International Tables Vol C Tables 4.2.6.8 and 6.1.1.4'
 'H'  'H'   0.0000   0.0000
 'International Tables Vol C Tables 4.2.6.8 and 6.1.1.4'
 'N'  'N'   0.0061   0.0033
 'International Tables Vol C Tables 4.2.6.8 and 6.1.1.4'
 'O'  'O'   0.0106   0.0060
 'International Tables Vol C Tables 4.2.6.8 and 6.1.1.4'
 
_space_group_crystal_system       monoclinic
_space_group_IT_number            15
_space_group_name_H-M_alt         'C 2/c'
_space_group_name_Hall            '-C 2yc'
 
_shelx_space_group_comment
;
The symmetry employed for this shelxl refinement is uniquely defined
by the following loop, which should always be used as a source of
symmetry information in preference to the above space-group names.
They are only intended as comments.
;
 
loop_
 _space_group_symop_operation_xyz
 'x, y, z'
 '-x, y, -z+1/2'
 'x+1/2, y+1/2, z'
 '-x+1/2, y+1/2, -z+1/2'
 '-x, -y, -z'
 'x, -y, z-1/2'
 '-x+1/2, -y+1/2, -z'
 'x+1/2, -y+1/2, z-1/2'
 
_cell_length_a                    21.2110(17)
_cell_length_b                    3.7625(3)
_cell_length_c                    13.9555(11)
_cell_angle_alpha                 90
_cell_angle_beta                  107.653(3)
_cell_angle_gamma                 90
_cell_volume                      1061.29(15)
_cell_formula_units_Z             8
_cell_measurement_temperature     150(2)
_cell_measurement_reflns_used     9968
_cell_measurement_theta_min       2.88
_cell_measurement_theta_max       36.32
 
_exptl_crystal_description        'Parallelepiped'
_exptl_crystal_colour             'colourless'
_exptl_crystal_density_meas       ?
_exptl_crystal_density_method     ?
_exptl_crystal_density_diffrn     1.541          
_exptl_crystal_F_000              512
_exptl_transmission_factor_min    ?
_exptl_transmission_factor_max    ?
_exptl_crystal_size_max           0.300
_exptl_crystal_size_mid           0.200
_exptl_crystal_size_min           0.200
_exptl_absorpt_coefficient_mu     0.118
_shelx_estimated_absorpt_T_min    0.965
_shelx_estimated_absorpt_T_max    0.977
_exptl_absorpt_correction_type    'psi-scans'
_exptl_absorpt_correction_T_min   0.7105
_exptl_absorpt_correction_T_max   0.7471
_exptl_absorpt_process_details    ?
_exptl_absorpt_special_details    ?
_diffrn_ambient_temperature       150(2)
_diffrn_radiation_wavelength      0.71073
_diffrn_radiation_type            MoK\a
_diffrn_source                    ?
_diffrn_measurement_device_type   'Bruker APEX-II CCD'
_diffrn_measurement_method        '\f and \w scans'
_diffrn_detector_area_resol_mean  ?
_diffrn_reflns_number             18364
_diffrn_reflns_av_unetI/netI      0.0338
_diffrn_reflns_av_R_equivalents   0.0460
_diffrn_reflns_limit_h_min        -34
_diffrn_reflns_limit_h_max        26
_diffrn_reflns_limit_k_min        -6
_diffrn_reflns_limit_k_max        6
_diffrn_reflns_limit_l_min        -22
_diffrn_reflns_limit_l_max        22
_diffrn_reflns_theta_min          2.015
_diffrn_reflns_theta_max          35.905
_diffrn_reflns_theta_full         25.242
_diffrn_measured_fraction_theta_max   0.992
_diffrn_measured_fraction_theta_full  0.997
_diffrn_reflns_Laue_measured_fraction_max    0.992
_diffrn_reflns_Laue_measured_fraction_full   0.997
_diffrn_reflns_point_group_measured_fraction_max   0.992
_diffrn_reflns_point_group_measured_fraction_full  0.997
_reflns_number_total              2478
_reflns_number_gt                 1932
_reflns_threshold_expression      'I > 2\s(I)'
_reflns_Friedel_coverage          0.000
_reflns_Friedel_fraction_max      .
_reflns_Friedel_fraction_full     .
 
_reflns_special_details
;
 Reflections were merged by SHELXL according to the crystal
 class for the calculation of statistics and refinement.
 
 _reflns_Friedel_fraction is defined as the number of unique
 Friedel pairs measured divided by the number that would be
 possible theoretically, ignoring centric projections and
 systematic absences.
;
 
_computing_data_collection        'Bruker APEX2'
_computing_cell_refinement        'Bruker SAINT'
_computing_data_reduction         'Bruker SAINT'
_computing_structure_solution     'SHELXT 2018/2 (Sheldrick, 2018)'
_computing_structure_refinement 'SHELXL-2018/3 (Sheldrick, 2018)'
_computing_molecular_graphics     'Mercury'
_computing_publication_material   ?
_refine_special_details           ?
_refine_ls_structure_factor_coef  Fsqd
_refine_ls_matrix_type            full
_refine_ls_weighting_scheme       calc
_refine_ls_weighting_details
'w=1/[\s^2^(Fo^2^)+(0.0755P)^2^+0.8518P] where P=(Fo^2^+2Fc^2^)/3'
_atom_sites_solution_primary      ?
_atom_sites_solution_secondary    ?
_atom_sites_solution_hydrogens    difmap
_refine_ls_hydrogen_treatment     refall
_refine_ls_extinction_method      none
_refine_ls_extinction_coef        .
_refine_ls_number_reflns          2478
_refine_ls_number_parameters      107
_refine_ls_number_restraints      0
_refine_ls_R_factor_all           0.0835
_refine_ls_R_factor_gt            0.0632
_refine_ls_wR_factor_ref          0.1565
_refine_ls_wR_factor_gt           0.1481
_refine_ls_goodness_of_fit_ref    1.095
_refine_ls_restrained_S_all       1.095
_refine_ls_shift/su_max           0.001
_refine_ls_shift/su_mean          0.000
 
loop_
 _atom_site_label
 _atom_site_type_symbol
 _atom_site_fract_x
 _atom_site_fract_y
 _atom_site_fract_z
 _atom_site_U_iso_or_equiv
 _atom_site_adp_type
 _atom_site_occupancy
 _atom_site_site_symmetry_order  
 _atom_site_calc_flag
 _atom_site_refinement_flags_posn
 _atom_site_refinement_flags_adp
 _atom_site_refinement_flags_occupancy
 _atom_site_disorder_assembly
 _atom_site_disorder_group
O2 O 0.52172(5) 0.5977(3) 0.09054(7) 0.0226(2) Uani 1 1 d . . . . .
O1 O 0.62409(5) 0.4671(3) 0.08524(7) 0.0242(2) Uani 1 1 d . . . . .
N1 N 0.57019(5) 0.8517(3) 0.28053(7) 0.01430(19) Uani 1 1 d . . . . .
C3 C 0.68042(6) 0.7685(3) 0.27568(8) 0.0150(2) Uani 1 1 d . . . . .
C2 C 0.61263(5) 0.7412(3) 0.23152(8) 0.0134(2) Uani 1 1 d . . . . .
C1 C 0.58530(6) 0.5878(3) 0.12661(8) 0.0159(2) Uani 1 1 d . . . . .
C6 C 0.59360(6) 0.9899(3) 0.37328(9) 0.0175(2) Uani 1 1 d . . . . .
C4 C 0.70509(6) 0.9097(3) 0.37204(9) 0.0174(2) Uani 1 1 d . . . . .
C5 C 0.66090(6) 1.0227(3) 0.42156(9) 0.0184(2) Uani 1 1 d . . . . .
H5 H 0.6746(10) 1.120(6) 0.4879(14) 0.027(5) Uiso 1 1 d . . . . .
H3 H 0.7076(10) 0.702(5) 0.2380(14) 0.025(5) Uiso 1 1 d . . . . .
H4 H 0.7517(11) 0.927(6) 0.4023(15) 0.028(5) Uiso 1 1 d . . . . .
H6 H 0.5630(11) 1.059(6) 0.4034(17) 0.037(6) Uiso 1 1 d . . . . .
H2 H 0.514(2) 0.508(12) 0.033(3) 0.033(12) Uiso 0.54(3) 1 d . . P . .
H1 H 0.5284(18) 0.823(10) 0.256(3) 0.015(10) Uiso 0.46(3) 1 d . . P . .
 
loop_
 _atom_site_aniso_label
 _atom_site_aniso_U_11
 _atom_site_aniso_U_22
 _atom_site_aniso_U_33
 _atom_site_aniso_U_23
 _atom_site_aniso_U_13
 _atom_site_aniso_U_12
O2 0.0128(4) 0.0372(6) 0.0159(4) -0.0063(4) 0.0016(3) -0.0003(4)
O1 0.0183(4) 0.0380(6) 0.0176(4) -0.0061(4) 0.0074(3) 0.0019(4)
N1 0.0103(4) 0.0190(4) 0.0137(4) -0.0002(3) 0.0037(3) 0.0001(3)
C3 0.0111(4) 0.0189(5) 0.0152(4) 0.0001(4) 0.0044(3) 0.0004(4)
C2 0.0115(4) 0.0153(4) 0.0135(4) 0.0017(3) 0.0041(3) 0.0003(3)
C1 0.0150(5) 0.0194(5) 0.0139(4) 0.0020(4) 0.0052(4) 0.0011(4)
C6 0.0190(5) 0.0193(5) 0.0167(4) -0.0041(4) 0.0092(4) -0.0026(4)
C4 0.0148(5) 0.0196(5) 0.0162(4) 0.0002(4) 0.0025(4) -0.0035(4)
C5 0.0215(5) 0.0192(5) 0.0150(4) -0.0029(4) 0.0062(4) -0.0053(4)
 
_geom_special_details
;
 All esds (except the esd in the dihedral angle between two l.s. planes)
 are estimated using the full covariance matrix.  The cell esds are taken
 into account individually in the estimation of esds in distances, angles
 and torsion angles; correlations between esds in cell parameters are only
 used when they are defined by crystal symmetry.  An approximate (isotropic)
 treatment of cell esds is used for estimating esds involving l.s. planes.
;
 
loop_
 _geom_bond_atom_site_label_1
 _geom_bond_atom_site_label_2
 _geom_bond_distance
 _geom_bond_site_symmetry_2
 _geom_bond_publ_flag
O2 C1 1.2891(15) . ?
O1 C1 1.2265(15) . ?
N1 C6 1.3425(15) . ?
N1 C2 1.3507(15) . ?
C3 C2 1.3857(16) . ?
C3 C4 1.3920(16) . ?
C2 C1 1.5159(16) . ?
C6 C5 1.3869(17) . ?
C4 C5 1.3893(18) . ?
 
loop_
 _geom_angle_atom_site_label_1
 _geom_angle_atom_site_label_2
 _geom_angle_atom_site_label_3
 _geom_angle
 _geom_angle_site_symmetry_1
 _geom_angle_site_symmetry_3
 _geom_angle_publ_flag
C6 N1 C2 119.93(10) . . ?
C2 C3 C4 119.56(11) . . ?
N1 C2 C3 120.86(10) . . ?
N1 C2 C1 119.20(10) . . ?
C3 C2 C1 119.94(10) . . ?
O1 C1 O2 126.76(11) . . ?
O1 C1 C2 118.75(10) . . ?
O2 C1 C2 114.49(10) . . ?
N1 C6 C5 121.89(11) . . ?
C5 C4 C3 118.99(11) . . ?
C6 C5 C4 118.77(10) . . ?
 
loop_
 _geom_torsion_atom_site_label_1
 _geom_torsion_atom_site_label_2
 _geom_torsion_atom_site_label_3
 _geom_torsion_atom_site_label_4
 _geom_torsion
 _geom_torsion_site_symmetry_1
 _geom_torsion_site_symmetry_2
 _geom_torsion_site_symmetry_3
 _geom_torsion_site_symmetry_4
 _geom_torsion_publ_flag
C6 N1 C2 C3 -0.04(17) . . . . ?
C6 N1 C2 C1 -179.66(11) . . . . ?
C4 C3 C2 N1 0.38(17) . . . . ?
C4 C3 C2 C1 180.00(11) . . . . ?
N1 C2 C1 O1 -175.35(11) . . . . ?
C3 C2 C1 O1 5.02(17) . . . . ?
N1 C2 C1 O2 4.13(16) . . . . ?
C3 C2 C1 O2 -175.50(11) . . . . ?
C2 N1 C6 C5 -0.22(18) . . . . ?
C2 C3 C4 C5 -0.45(18) . . . . ?
N1 C6 C5 C4 0.14(19) . . . . ?
C3 C4 C5 C6 0.20(18) . . . . ?
 
_refine_diff_density_max    0.695
_refine_diff_density_min   -0.402
_refine_diff_density_rms    0.077

_shelx_res_file
;
TITL 20210526_DS_150K_0m_a.res in C2/c
    shelx.res
    created by SHELXL-2018/3 at 14:26:09 on 31-May-2021
CELL  0.71073  21.2110   3.7625  13.9555   90.000  107.653   90.000
ZERR     8.00   0.0017   0.0003   0.0011    0.000    0.003    0.000
LATT   7
SYMM  - X,   Y, 1/2 - Z
SFAC  C    H    N    O
UNIT  48 40 8 16
MERG   2
OMIT     0.00 180.00
OMIT   -17   1   4
OMIT     0   2   1
FMAP   2
PLAN   20
SIZE     0.200   0.200   0.300
ACTA
BOND
CONF
LIST   6
L.S.  10
TEMP     0.00
WGHT    0.075500    0.851800
FVAR       0.57266   0.54329
O2    4    0.521722    0.597730    0.090542    11.00000    0.01279    0.03724 =
         0.01591   -0.00631    0.00157   -0.00030
O1    4    0.624088    0.467131    0.085240    11.00000    0.01828    0.03804 =
         0.01764   -0.00614    0.00745    0.00186
N1    3    0.570192    0.851707    0.280528    11.00000    0.01028    0.01896 =
         0.01368   -0.00024    0.00366    0.00005
C3    1    0.680418    0.768484    0.275681    11.00000    0.01108    0.01886 =
         0.01523    0.00015    0.00436    0.00042
C2    1    0.612635    0.741223    0.231521    11.00000    0.01152    0.01529 =
         0.01348    0.00170    0.00414    0.00030
C1    1    0.585304    0.587821    0.126610    11.00000    0.01500    0.01938 =
         0.01393    0.00205    0.00519    0.00111
C6    1    0.593604    0.989853    0.373277    11.00000    0.01903    0.01926 =
         0.01670   -0.00415    0.00920   -0.00265
C4    1    0.705091    0.909687    0.372045    11.00000    0.01483    0.01955 =
         0.01621    0.00018    0.00250   -0.00355
C5    1    0.660899    1.022745    0.421564    11.00000    0.02148    0.01919 =
         0.01505   -0.00291    0.00621   -0.00530
H5    2    0.674617    1.119887    0.487911    11.00000    0.02692
H3    2    0.707604    0.701941    0.237965    11.00000    0.02520
H4    2    0.751729    0.926766    0.402301    11.00000    0.02810
H6    2    0.562964    1.058864    0.403363    11.00000    0.03688
H2    2    0.513870    0.508402    0.033153    21.00000    0.03304
H1    2    0.528409    0.823246    0.256275   -21.00000    0.01451
HKLF    4


REM  20210526_DS_150K_0m_a.res in C2/c
REM wR2 = 0.1565, GooF = S = 1.095, Restrained GooF = 1.095 for all data
REM R1 = 0.0632 for 1932 Fo > 4sig(Fo) and 0.0835 for all 2478 data
REM 107 parameters refined using 0 restraints

END

WGHT      0.0761      0.8183

REM Highest difference peak  0.695,  deepest hole -0.402,  1-sigma level  0.077
Q1    1   0.5986  0.6578  0.1785  11.00000  0.05    0.70
Q2    1   0.6897  0.8393  0.3229  11.00000  0.05    0.59
Q3    1   0.5835  0.9119  0.3233  11.00000  0.05    0.54
Q4    1   0.6471  0.7689  0.2518  11.00000  0.05    0.49
Q5    1   0.6821  0.9300  0.4035  11.00000  0.05    0.44
Q6    1   0.6294  0.9956  0.3972  11.00000  0.05    0.37
Q7    1   0.5891  0.7676  0.2616  11.00000  0.05    0.34
Q8    1   0.6117  0.6322  0.0963  11.00000  0.05    0.32
Q9    1   0.6083  0.4072  0.0385  11.00000  0.05    0.29
Q10   1   0.5516  0.5915  0.1087  11.00000  0.05    0.29
Q11   1   0.6196  0.5203  0.0409  11.00000  0.05    0.24
Q12   1   0.5879  0.9507  0.2293  11.00000  0.05    0.24
Q13   1   0.6123  0.9282  0.1409  11.00000  0.05    0.23
Q14   1   0.6318  0.1994  0.0848  11.00000  0.05    0.23
Q15   1   0.6136  0.4658  0.1157  11.00000  0.05    0.23
Q16   1   0.5418  0.4739  0.1060  11.00000  0.05    0.22
Q17   1   0.6096  0.0891  0.0946  11.00000  0.05    0.22
Q18   1   0.6406  1.4966  0.4522  11.00000  0.05    0.21
Q19   1   0.6303  0.7046  0.0464  11.00000  0.05    0.21
Q20   1   0.5000  1.2748  0.2500  10.50000  0.05    0.21
;
_shelx_res_checksum   80839

_shelx_hkl_file
;
  -2   0   0  729.53   19.40
  -4   0   0 4813.32  126.39
  -4   0   0 4878.21  126.29
  -6   0   0  103.19    4.70
  -6   0   0  100.99    4.80
  -6   0   0   91.29    4.50
  -6   0   0   94.89    4.90
  -6   0   0   88.29    4.50
   6   0   0   89.89    4.30
   6   0   0   87.09    4.20
   8   0   0   51.29    3.70
  -8   0   0   53.09    4.40
   8   0   0   50.39    3.70
  -8   0   0   54.39    3.90
  -8   0   0   54.99    4.30
  -8   0   0   49.70    4.00
  -8   0   0   54.69    4.50
 -10   0   0 1444.26   40.00
 -10   0   0 1449.55   40.00
 -10   0   0 1487.15   39.80
 -10   0   0 1455.15   39.80
 -10   0   0 1400.26   40.20
  10   0   0 1418.66   39.50
  10   0   0 1499.45   39.80
 -12   0   0   53.59    4.50
 -12   0   0   55.69    4.70
 -12   0   0   49.40    4.80
 -12   0   0   48.20    4.70
 -14   0   0   52.69    5.20
  14   0   0   45.50    4.40
 -14   0   0   56.59    5.10
 -14   0   0   49.80    4.90
 -14   0   0   51.49    5.30
  14   0   0   50.79    4.30
 -14   0   0   49.99    5.00
 -16   0   0    0.40    3.10
  16   0   0    1.90    2.30
 -16   0   0   -0.60    3.10
 -16   0   0    4.30    2.70
 -16   0   0   -0.10    3.10
 -16   0   0    1.90    1.80
 -16   0   0    5.20    3.30
  16   0   0    2.30    2.50
 -18   0   0   60.69    6.80
 -18   0   0   58.79    3.80
 -18   0   0   73.39    7.80
 -18   0   0   69.99    7.50
 -18   0   0   57.49    6.40
 -20   0   0  308.17   13.20
 -20   0   0  300.77   12.90
 -20   0   0  301.27   13.50
 -20   0   0  292.27   12.50
 -22   0   0  235.48   12.00
 -22   0   0  220.88   11.70
 -22   0   0  216.48   11.60
 -22   0   0  243.98   11.70
 -24   0   0   15.60    6.00
 -24   0   0   29.50    7.30
 -24   0   0   22.20    6.10
 -26   0   0   11.00    5.80
 -26   0   0    7.40    5.50
 -26   0   0   -1.90    5.60
 -28   0   0   32.10    7.00
 -28   0   0   28.90    7.30
 -30   0   0   31.30    7.50
 -30   0   0   26.50    7.30
 -32   0   0    6.40    6.00
 -32   0   0    4.20    7.00
  -1  -1   0  104.39    4.10
  -1  -1   0  105.29    4.20
  -1  -1   0   94.79    5.10
   1  -1   0  108.19    5.00
  -1  -1   0  101.19    4.00
   1  -1   0  109.59    4.40
  -1  -1   0  111.79    4.80
   1   1   0  108.19    4.30
   1   1   0  107.19    4.20
  -1   1   0  105.19    3.70
  -1   1   0  120.49    4.90
  -1   1   0  117.39    3.80
   1   1   0  101.69    4.40
   1   1   0  130.59    5.00
  -1   1   0  104.39    4.20
   1   1   0  103.19    4.30
  -1   1   0  106.19    3.70
  -1   1   0  115.09    3.80
  -3  -1   0 1240.28   33.00
  -3  -1   0 1215.18   33.00
   3  -1   0 1220.78   33.00
  -3  -1   0 1223.88   33.00
  -3  -1   0 1204.58   32.80
  -3  -1   0 1217.98   32.80
   3  -1   0 1198.58   32.50
   3   1   0 1236.88   33.10
   3   1   0 1214.58   32.80
   3   1   0 1224.18   33.00
   3   1   0 1207.58   32.90
  -3   1   0 1196.98   32.50
   3   1   0 1237.08   33.10
  -5  -1   0  142.39    5.90
   5  -1   0  137.69    5.30
   5  -1   0  134.19    5.50
  -5  -1   0  142.99    6.00
  -5  -1   0  144.09    5.80
  -5  -1   0  143.09    5.90
   5   1   0  136.39    5.90
   5   1   0  141.69    6.20
   5   1   0  139.99    6.00
  -5   1   0  141.09    5.10
  -5   1   0  138.29    4.60
   5   1   0  149.69    6.30
   5   1   0  139.09    5.80
   7  -1   0 1427.86   38.90
  -7  -1   0 1433.46   39.60
  -7  -1   0 1453.95   39.70
  -7  -1   0 1476.85   39.60
  -7  -1   0 1483.65   39.50
   7   1   0 1457.15   39.50
   7   1   0 1468.25   39.70
   7   1   0 1464.85   39.70
  -7   1   0 1393.46   38.80
   7   1   0 1487.65   40.00
  -7   1   0 1406.16   38.50
   7   1   0 1467.35   39.80
  -7   1   0 1407.96   38.40
  -7   1   0 1398.16   39.10
   9  -1   0  996.30   26.80
  -9  -1   0  996.40   28.50
  -9  -1   0 1018.10   28.40
   9  -1   0  986.90   26.80
  -9  -1   0 1040.40   28.70
  -9  -1   0  996.80   28.50
   9  -1   0  979.60   27.30
  -9   1   0 1001.60   27.20
  -9   1   0  949.40   27.20
   9   1   0  972.60   28.40
  -9   1   0  987.90   27.40
   9   1   0  984.60   28.70
  -9   1   0  974.60   27.30
   9   1   0 1029.60   28.60
   9   1   0 1020.00   28.70
   9   1   0  970.50   28.10
  11  -1   0  226.58    7.60
 -11  -1   0  223.28    9.10
  11  -1   0  233.68    7.60
 -11  -1   0  233.28    9.20
 -11  -1   0  231.38    9.40
 -11  -1   0  243.38    9.50
  11   1   0  228.58    9.20
 -11   1   0  237.98    8.40
 -11   1   0  221.78    8.10
  11   1   0  257.67    9.80
  11   1   0  233.68    9.00
 -11   1   0  210.48    7.70
 -11   1   0  234.98    8.20
  11   1   0  221.38    9.80
 -13  -1   0  265.97   10.70
 -13  -1   0  262.17   10.80
 -13  -1   0  278.77   11.50
 -13  -1   0  277.77   10.70
 -13  -1   0  258.17   10.50
  13  -1   0  255.07    8.80
  13  -1   0  269.17    8.80
 -13   1   0  270.37    9.50
  13   1   0  258.47   10.20
 -13   1   0  254.37    9.20
 -13   1   0  243.48    8.70
 -13   1   0  257.17    9.70
 -13   1   0  265.07    9.50
  13   1   0  281.77   11.40
 -13   1   0  274.97    9.80
  15  -1   0    1.20    2.20
 -15  -1   0    2.70    3.60
  15  -1   0    3.20    2.30
 -15  -1   0    0.90    3.00
 -15  -1   0    4.30    3.50
 -15  -1   0    8.80    3.90
 -15  -1   0    4.50    3.20
 -15   1   0    1.80    3.00
 -15   1   0    2.30    3.00
  15   1   0    3.50    3.00
 -15   1   0   -2.80    3.00
 -15   1   0    6.20    3.20
  15   1   0    7.30    3.00
 -15   1   0    4.40    2.10
 -17  -1   0   27.50    5.00
 -17  -1   0   24.20    4.60
 -17  -1   0   22.00    4.90
  17  -1   0   20.60    3.10
 -17  -1   0   28.40    5.20
 -17   1   0   24.80    4.20
 -17   1   0   23.80    4.30
  17   1   0   17.80    4.10
 -17   1   0   19.40    4.30
 -17   1   0   24.40    4.20
 -19  -1   0  364.56   14.80
 -19  -1   0  363.46   15.10
 -19  -1   0  364.36   15.20
 -19  -1   0  368.96   15.00
 -19   1   0  371.66   13.80
 -19   1   0  367.36   14.10
 -19   1   0  350.96   14.50
 -19   1   0  360.56   14.00
 -21  -1   0   23.40    6.10
 -21  -1   0   28.40    6.10
 -21  -1   0   25.90    5.40
 -21   1   0   31.70    5.30
 -21   1   0   27.00    5.10
 -21   1   0   34.70    5.60
 -21   1   0   26.20    5.60
 -23  -1   0   15.30    5.40
 -23  -1   0   19.10    5.90
 -23   1   0   23.90    6.20
 -23   1   0   10.60    4.90
 -23   1   0    6.50    5.00
 -23   1   0   15.10    4.50
 -25  -1   0    2.90    5.20
 -25  -1   0    7.30    5.40
 -25   1   0   23.30    5.90
 -25   1   0   -0.10    5.20
 -25   1   0    0.40    4.60
 -25   1   0    3.60    4.80
 -27  -1   0    3.00    5.10
 -27  -1   0   -8.30    5.50
 -27   1   0    4.30    5.40
 -27   1   0    4.60    5.10
 -29  -1   0  113.09   10.60
 -29  -1   0  112.39   11.00
 -29   1   0  120.69   10.80
 -29   1   0  122.59   10.30
 -31  -1   0   30.60    7.80
 -31  -1   0   27.00    7.10
 -31   1   0   29.00    7.10
 -31   1   0   25.90    7.30
   0  -2   0  751.82   22.10
   0  -2   0  742.83   20.70
   0  -2   0  733.13   20.70
   0  -2   0  775.52   21.80
   0  -2   0  782.52   22.70
   0  -2   0  779.42   20.80
   0  -2   0  790.62   20.70
   0   2   0  739.03   21.20
   0   2   0  753.22   21.10
   0   2   0  745.73   21.20
   0   2   0  733.83   21.40
   0   2   0  780.72   22.20
  -2  -2   0   87.09    4.20
  -2  -2   0   86.49    5.70
  -2  -2   0   79.09    5.20
  -2  -2   0   75.49    4.10
  -2  -2   0   85.19    4.30
  -2  -2   0   74.89    4.10
   2   2   0   85.89    4.40
   2   2   0   85.89    4.90
   2   2   0   78.69    4.60
   2   2   0   79.09    4.60
   4  -2   0  128.39    5.70
  -4  -2   0  128.89    5.70
  -4  -2   0  129.59    5.60
  -4  -2   0  114.59    6.70
  -4  -2   0  130.89    6.20
   4  -2   0  127.99    6.60
  -4  -2   0  131.69    7.60
  -4   2   0  119.29    4.60
   4   2   0  124.59    5.70
   4   2   0  126.39    6.50
  -4   2   0  133.89    6.50
   4   2   0  118.29    6.00
   4   2   0  125.59    6.20
   4   2   0  123.49    5.90
  -4   2   0  121.89    4.40
  -4   2   0  111.59    5.70
   6  -2   0   10.40    2.90
   6  -2   0   14.20    2.70
  -6  -2   0   20.60    3.70
  -6  -2   0   15.50    3.00
  -6   2   0   16.20    3.20
  -8  -2   0  133.49    6.70
  -8  -2   0  141.49    6.90
  -8  -2   0  134.89    6.70
  -8  -2   0  134.59    7.20
  -8  -2   0  140.49    7.10
   8  -2   0  136.59    6.20
  -8  -2   0  137.49    6.90
   8  -2   0  134.59    6.80
   8   2   0  143.89    7.00
   8   2   0  131.79    7.40
   8   2   0  131.39    7.20
  -8   2   0  138.79    5.90
  -8   2   0  150.18    5.20
   8   2   0  129.39    6.70
   8   2   0  154.08    7.60
 -10  -2   0   -0.30    3.00
 -10  -2   0   -0.30    3.00
  10  -2   0    3.20    2.40
 -10  -2   0   -0.70    2.60
 -10  -2   0    2.30    2.80
  10  -2   0   -2.20    2.30
 -10  -2   0   -2.30    2.80
  10   2   0   -0.80    3.40
 -10   2   0   -1.10    1.90
  10   2   0    1.80    2.70
  10   2   0    0.80    3.10
 -10   2   0    4.20    2.10
  10   2   0   -4.30    2.30
  10   2   0    0.60    3.20
 -12  -2   0    5.30    3.20
 -12  -2   0    2.90    3.20
  12  -2   0    9.30    3.10
 -12  -2   0    7.30    3.70
 -12  -2   0    7.60    3.70
 -12  -2   0   10.40    3.20
 -12   2   0    7.70    2.40
  12   2   0    1.00    3.60
  12   2   0    2.20    3.20
  12   2   0   13.50    3.90
  12   2   0    4.50    3.80
 -12   2   0    8.00    2.60
  12   2   0    5.80    3.30
  14  -2   0   65.29    5.50
 -14  -2   0   78.69    6.80
 -14  -2   0   69.79    6.40
 -14  -2   0   72.79    6.90
 -14   2   0   63.79    5.10
  14   2   0   66.29    6.70
  14   2   0   76.29    6.30
  14   2   0   60.69    6.80
 -14   2   0   66.49    4.90
  14   2   0   69.69    7.10
 -16  -2   0  187.28    9.00
 -16  -2   0  188.28   10.20
 -16  -2   0  183.38   10.30
  16   2   0  175.88   10.60
 -16   2   0  186.68    8.20
 -16   2   0  191.08    8.30
 -16   2   0  179.08    8.20
  16   2   0  187.48   10.00
 -16   2   0  179.08    8.30
 -18  -2   0   66.19    7.30
 -18  -2   0   67.09    6.60
 -18  -2   0   67.69    7.70
 -18   2   0   72.09    5.90
 -18   2   0   58.99    6.00
 -18   2   0   53.89    5.90
 -18   2   0   64.09    6.10
 -20  -2   0   13.10    4.50
 -20  -2   0    9.00    4.90
 -20  -2   0   17.40    5.40
 -20   2   0   -1.20    3.90
 -20   2   0   20.70    4.80
 -20   2   0   12.00    4.20
 -20   2   0    9.20    5.20
 -22  -2   0   10.10    5.00
 -22  -2   0    5.90    4.30
 -22  -2   0   -2.90    5.00
 -22   2   0    7.00    4.40
 -22   2   0   -1.00    4.30
 -22   2   0    3.80    4.40
 -22   2   0   11.80    4.20
 -24  -2   0  127.89   10.80
 -24  -2   0  135.99    8.50
 -24  -2   0  133.49   10.40
 -24   2   0  121.59    8.80
 -24   2   0  114.69    8.80
 -24   2   0  154.18    9.10
 -26  -2   0   36.00    8.30
 -26  -2   0   31.40    7.40
 -26  -2   0   56.69    6.30
 -26   2   0   37.10    6.20
 -26   2   0   34.40    6.20
 -26   2   0   26.80    5.80
 -28  -2   0  256.97   15.60
 -28  -2   0  254.37   14.50
 -28   2   0  271.77   13.30
 -28   2   0  236.68   13.50
 -30  -2   0   13.70    6.60
 -30  -2   0   28.50    8.00
 -30   2   0   18.30    6.40
 -30   2   0   23.80    6.90
   1  -3   0   -1.30    2.90
  -1  -3   0    2.40    2.00
  -1  -3   0    6.80    3.30
   1  -3   0    5.30    3.80
  -1  -3   0    1.10    3.40
  -1  -3   0    1.50    2.70
   1   3   0    2.10    3.10
  -1   3   0    0.80    2.00
   1   3   0    0.80    2.60
  -1   3   0    2.30    2.50
  -1   3   0   -0.30    2.30
  -1   3   0    1.30    2.60
   1   3   0    2.90    2.30
   1   3   0    0.70    2.50
  -1   3   0    2.50    3.40
   1   3   0    8.70    3.60
  -3  -3   0    6.90    2.60
  -3  -3   0   -4.90    3.20
   3  -3   0    1.40    3.20
   3  -3   0    1.50    3.50
  -3  -3   0    3.50    2.10
  -3  -3   0    2.70    2.30
  -3  -3   0   -2.00    3.30
  -3  -3   0    1.40    3.10
   3   3   0    0.90    3.80
   3   3   0    3.50    3.10
  -3   3   0    5.30    2.50
  -3   3   0   -1.10    2.10
   3   3   0    4.00    2.70
  -3   3   0    3.90    2.40
   3   3   0   -2.60    2.60
  -3   3   0    0.20    2.20
  -3   3   0    5.40    3.70
  -5  -3   0    1.40    2.60
  -5  -3   0    1.20    3.50
   5  -3   0    2.20    3.80
  -5  -3   0    2.70    2.60
  -5  -3   0    7.10    2.70
  -5  -3   0   -4.00    3.30
  -5  -3   0    3.90    2.40
   5  -3   0    0.90    3.00
  -5   3   0    6.50    2.50
  -5   3   0    8.90    4.00
   5   3   0    4.80    3.10
   5   3   0   -0.80    3.70
   5   3   0    4.30    3.40
   5   3   0    2.20    3.00
  -5   3   0    4.90    2.00
   5   3   0    2.10    3.50
  -7  -3   0   26.40    4.10
   7  -3   0   29.10    5.40
  -7  -3   0   18.70    4.60
  -7  -3   0   22.50    4.20
   7  -3   0   27.90    4.20
   7   3   0   30.40    5.10
   7   3   0   25.60    4.20
   7   3   0   27.10    5.20
   7   3   0   29.20    4.50
   7   3   0   23.70    4.60
  -7   3   0   27.50    5.20
  -7   3   0   31.80    3.30
  -9  -3   0   -2.20    3.70
   9  -3   0    0.70    3.70
  -9  -3   0    3.50    3.30
  -9  -3   0    2.10    3.50
   9  -3   0    2.50    3.20
   9   3   0    5.60    3.70
   9   3   0    6.30    4.40
   9   3   0   -5.10    4.00
   9   3   0    1.70    3.50
   9   3   0    0.90    3.50
 -11  -3   0   59.89    7.10
  11  -3   0   53.09    6.20
 -11  -3   0   59.19    6.60
 -11  -3   0   58.59    6.20
  11  -3   0   59.19    5.60
  11   3   0   68.49    7.20
  11   3   0   54.19    6.10
  11   3   0   70.69    7.40
  11   3   0   51.39    6.70
  11   3   0   65.99    6.50
 -11   3   0   53.49    3.80
 -13  -3   0    8.90    4.50
 -13  -3   0   24.30    5.40
  13  -3   0    8.00    4.50
 -13  -3   0    8.30    4.10
 -13   3   0   14.50    2.90
  13   3   0   11.50    3.90
  13   3   0    5.70    5.30
  13   3   0   13.20    5.10
  13   3   0   12.80    5.20
 -15  -3   0  260.37   12.10
  15  -3   0  255.07   11.60
 -15  -3   0  251.77   12.60
 -15  -3   0  267.67   12.40
  15   3   0  251.77   13.20
 -15   3   0  247.88    9.40
 -17  -3   0   95.09    8.90
 -17  -3   0   86.89    8.30
  17  -3   0   90.69    7.40
 -17  -3   0   78.99    8.40
  17   3   0   82.49    9.30
 -17   3   0   85.79    5.90
 -17   3   0   79.69    6.00
 -19  -3   0   80.39    8.30
 -19  -3   0   73.09    8.00
 -19  -3   0   63.09    8.20
 -19   3   0   72.29    5.80
  19   3   0   61.69    8.70
 -19   3   0   73.49    6.10
 -19   3   0   71.19    6.20
 -19   3   0   65.79    6.80
 -21  -3   0   40.30    6.30
 -21  -3   0   40.10    7.40
 -21  -3   0   22.30    5.80
 -21   3   0   42.60    5.40
 -21   3   0   39.00    5.30
 -21   3   0   44.80    5.70
 -21   3   0   40.50    7.30
 -23  -3   0   -6.80    4.80
 -23  -3   0   -3.40    5.30
 -23   3   0    4.90    4.00
 -23   3   0    2.10    4.20
 -23   3   0    1.30    3.70
 -23   3   0    9.60    5.40
 -25  -3   0   -8.80    5.60
 -25  -3   0   16.10   11.40
 -25  -3   0    1.60    4.60
 -25   3   0    3.00    4.00
 -25   3   0    5.50    4.60
 -25   3   0   -3.50    4.40
 -27  -3   0   36.50    8.80
 -27  -3   0   47.70    6.80
 -27  -3   0   26.70    7.60
 -27   3   0   34.90    6.20
 -27   3   0   46.40    6.80
 -29  -3   0   11.00    6.40
 -29  -3   0   26.40    8.40
   0  -4   0   47.50    7.00
   0  -4   0   52.29    6.30
   0   4   0   53.29    5.80
   0   4   0   44.10    6.60
   0   4   0   54.69    5.20
   0   4   0   54.99    5.50
   0   4   0   47.80    5.80
   2  -4   0   60.79    7.80
  -2  -4   0   50.99    7.20
   2  -4   0   49.20    6.20
  -2  -4   0   53.89    7.10
   2   4   0   58.49    5.70
   2   4   0   47.80    6.70
   2   4   0   43.70    5.90
   2   4   0   44.60    5.10
  -2   4   0   54.29    7.00
   2   4   0   44.90    5.60
  -2   4   0   50.49    5.00
  -2   4   0   48.10    5.40
  -2   4   0   43.70    5.30
  -2   4   0   46.20    4.70
   4  -4   0  239.98   11.00
  -4  -4   0  227.68    8.60
  -4  -4   0  216.98   12.00
  -4  -4   0  227.58    8.50
   4  -4   0  251.27   12.80
  -4  -4   0  231.58   12.60
   4   4   0  224.78   10.10
  -4   4   0  230.58    8.80
   4   4   0  221.48   10.70
   4   4   0  211.48   11.60
  -4   4   0  229.88    9.00
  -4   4   0  233.98   11.80
   4   4   0  246.88   10.60
  -4   4   0  232.48    9.50
   4   4   0  246.28   11.50
   6  -4   0   32.30    5.30
  -6  -4   0   38.20    6.40
   6  -4   0   30.80    6.50
  -6  -4   0   30.60    4.30
  -6  -4   0   37.70    6.60
   6   4   0   28.50    5.70
   6   4   0   40.40    5.70
   6   4   0   26.20    5.80
   6   4   0   27.30    6.10
  -6   4   0   32.90    6.30
  -6   4   0   30.60    3.90
   6   4   0   38.90    5.40
  -8  -4   0   44.50    7.30
   8  -4   0   52.79    6.20
   8  -4   0   49.30    8.00
  -8  -4   0   45.40    5.50
  -8  -4   0   45.30    6.50
   8   4   0   49.00    7.40
   8   4   0   52.69    6.60
   8   4   0   42.70    6.50
  -8   4   0   41.40    7.00
   8   4   0   51.19    7.00
   8   4   0   42.20    6.90
 -10  -4   0    1.00    3.90
 -10  -4   0    2.80    4.80
 -10  -4   0    0.50    5.10
  10  -4   0    8.50    4.00
 -10  -4   0    9.40    3.70
  10  -4   0    7.10    5.40
 -10   4   0    1.60    5.20
  10   4   0    4.40    4.50
  10   4   0    7.80    5.60
  10   4   0   11.00    5.20
  10   4   0   11.60    4.50
  10   4   0    4.70    4.70
 -12  -4   0    1.20    5.10
 -12  -4   0    6.20    3.80
  12  -4   0   -0.20    5.40
 -12  -4   0    5.60    3.80
  12   4   0   14.50    5.50
  12   4   0    8.60    5.80
  12   4   0    9.70    4.90
 -12   4   0    5.00    5.30
  12   4   0   -2.30    4.80
 -14  -4   0  178.88   10.50
 -14  -4   0  197.68   12.40
 -14  -4   0  201.18   10.80
  14   4   0  173.58   13.00
  14   4   0  186.18   12.40
 -14   4   0  205.48   12.30
 -16  -4   0    2.60    4.40
 -16  -4   0   -0.50    4.40
 -16  -4   0   -2.10    5.40
  16  -4   0   -0.40    5.10
  16   4   0    6.30    6.20
 -16   4   0    9.60    6.50
 -18  -4   0   65.69    7.90
 -18  -4   0   87.69    9.60
 -18  -4   0   73.59    8.10
  18  -4   0   71.09    8.20
  18   4   0   75.59    9.80
 -18   4   0   59.09   11.50
 -20  -4   0    9.00    5.50
 -20  -4   0    6.40    6.10
 -20  -4   0   -0.60    5.40
  20   4   0    3.20    6.10
 -20   4   0    3.30    6.80
 -22  -4   0   23.40    6.90
 -22  -4   0   23.20    6.30
 -22  -4   0   44.20    7.90
 -22   4   0   34.00    8.20
 -24  -4   0   -1.40    5.60
 -24  -4   0    3.30    6.40
  -1  -5   0   54.59    9.50
   1  -5   0   50.49    8.20
  -1  -5   0   41.00    7.20
   1  -5   0   41.70    7.00
   1   5   0   41.90    6.10
  -1   5   0   47.60    6.10
   1   5   0   55.89    8.10
  -1   5   0   55.69    6.10
  -1   5   0   44.30    7.90
  -1   5   0   51.69    5.60
   1   5   0   62.49    6.90
   1   5   0   51.29    5.60
   1   5   0   53.59    7.80
   3  -5   0    8.20    5.00
  -3  -5   0    0.20    4.60
  -3  -5   0    2.90    6.50
   3  -5   0    8.40    6.60
  -3   5   0   11.80    3.70
  -3   5   0   11.10    3.20
   3   5   0   -7.20    5.10
   3   5   0    1.20    7.50
  -3   5   0    1.90    3.80
   3   5   0   -4.00    5.00
  -3   5   0   11.00    6.10
   3   5   0   -2.50    4.40
  -3   5   0   -4.80    6.20
   3   5   0   -4.30    7.40
  -5  -5   0    6.10    6.20
   5  -5   0   16.50    7.80
   5  -5   0    8.70    5.50
  -5  -5   0    5.40    5.40
   5   5   0    4.10    6.30
  -5   5   0    5.20    5.70
   5   5   0   11.10    5.70
   5   5   0   21.90    5.20
  -5   5   0   10.30    4.30
   5   5   0    5.20    5.20
  -7  -5   0   11.70    6.30
   7  -5   0   -0.50    4.70
   7  -5   0    0.60    6.30
  -7  -5   0   -0.30    5.70
   7   5   0    3.80    6.90
  -7   5   0    1.40    6.30
   7   5   0    6.60    5.50
   7   5   0    9.50    6.70
   9  -5   0   17.50    5.00
  -9  -5   0   26.90    8.30
  -9  -5   0   14.20    6.90
   9  -5   0   22.80    8.10
  -9   5   0   24.00    7.10
 -11  -5   0   80.99    9.40
 -11  -5   0   52.99    9.20
  11  -5   0   69.89    8.00
  11  -5   0   86.49   10.50
  11   5   0   75.29    9.50
 -13  -5   0   14.10    7.90
  13  -5   0   27.10    6.20
  13  -5   0   38.80    8.80
 -13  -5   0   49.20    8.70
 -13   5   0   39.10    8.20
  13   5   0   39.20    8.30
  15  -5   0   78.89   10.10
 -15  -5   0   75.09   11.90
 -15  -5   0   47.70    9.30
  15   5   0   48.90    9.30
 -15   5   0   67.79    9.50
 -17  -5   0    7.30    7.20
 -17  -5   0    4.60    6.80
  17  -5   0    4.10    6.10
 -17   5   0    9.20    6.70
  17   5   0   17.20    7.60
 -19  -5   0   14.50    6.90
 -19  -5   0   14.10    8.20
  19  -5   0    8.40    6.60
 -19   5   0    8.20    7.70
  19   5   0    8.70    8.10
   0  -6   0   36.00   11.30
   0  -6   0   19.50    6.30
   0   6   0   15.90    7.10
  -2  -6   0    9.00    6.30
  -2  -6   0   14.20    8.10
   2  -6   0    8.10    6.00
   2  -6   0    2.90    8.20
   2   6   0   15.50    7.20
  -2   6   0   10.80    6.50
  -4  -6   0   -0.30    5.90
   4  -6   0   -4.50    7.60
  -4  -6   0    8.10    8.80
   4  -6   0   11.70    6.30
   4   6   0   -0.10    6.80
  -4   6   0    6.20    6.80
   6  -6   0    2.50    7.60
  -6  -6   0   13.10    6.60
  -6  -6   0    5.90    8.10
   6  -6   0   19.00    6.30
   6   6   0   19.60    7.10
  -6   6   0   16.60    7.60
   8  -6   0    1.80    7.80
  -8  -6   0    2.70    6.30
   8  -6   0   -3.40    5.60
  -8  -6   0   -2.40    7.80
  -8   6   0  -10.20    7.10
   8   6   0   -0.10    7.30
 -32   0   1    0.10    6.40
 -32   0   1    6.80    6.20
 -30   0   1    1.90    5.40
 -30   0   1   -2.30    6.10
 -28   0   1    0.80    5.70
 -28   0   1   -4.30    5.20
 -26   0   1   13.60    6.30
 -26   0   1   -0.50    5.20
 -26   0   1   -1.10    4.90
 -24   0   1    2.90    4.40
 -24   0   1   -5.60    4.30
 -24   0   1    4.90    5.50
 -22   0   1    0.20    4.00
 -22   0   1    0.30    4.40
 -22   0   1   -0.90    4.40
 -22   0   1    3.10    4.60
 -20   0   1   -0.60    3.90
 -20   0   1    2.00    3.80
 -20   0   1    0.30    4.10
 -20   0   1    2.00    3.70
 -18   0   1   -1.70    3.60
 -18   0   1   -1.20    3.20
 -18   0   1   -2.20    3.40
 -18   0   1   -6.50    3.70
 -16   0   1   -0.10    3.30
 -16   0   1    0.60    2.60
  16   0  -1    0.70    2.50
  16   0  -1   -1.30    2.30
 -16   0   1   -3.70    3.00
 -16   0   1    0.00    3.10
 -16   0   1   -2.90    3.10
 -14   0   1   -0.60    2.70
  14   0  -1   -1.10    2.10
 -14   0   1    1.50    2.80
  14   0  -1   -2.40    2.00
 -14   0   1   -5.70    2.50
 -14   0   1    1.70    2.70
 -14   0   1   -0.60    2.70
  12   0  -1    1.80    2.30
  12   0  -1   -2.20    2.00
 -12   0   1   -5.20    2.90
 -12   0   1    1.90    2.50
 -12   0   1   -3.00    2.40
 -12   0   1    1.80    3.20
 -12   0   1    2.90    2.70
 -10   0   1   -3.30    2.30
 -10   0   1    0.40    2.30
 -10   0   1   -1.10    2.40
 -10   0   1   -0.70    2.40
  10   0  -1   -2.80    2.10
  10   0  -1   -1.20    2.20
   8   0  -1   -3.10    2.20
  -8   0   1   -2.10    2.30
  -8   0   1   -2.80    2.10
  -6   0   1   -1.50    2.10
   6   0  -1    3.30    1.90
  -6   0   1   -0.70    2.10
   6   0  -1    3.50    1.90
   4   0  -1    3.20    1.60
   4   0  -1    1.30    1.50
  -4   0   1    1.10    1.70
  -2   0   1    3.60    1.10
  -2   0   1    2.00    1.10
  -2   0  -1    0.40    1.30
   2   0   1    1.40    1.00
   2   0   1    2.00    1.10
  -2   0  -1    2.30    1.10
   2   0   1   -0.20    0.90
  -2   0  -1    2.20    1.20
  -2   0  -1    1.50    1.10
   2   0   1    0.40    1.20
   2   0   1    0.20    1.40
  -2   0  -1    0.80    1.20
   4   0   1   -0.70    1.60
  -4   0  -1    0.00    1.70
  -4   0  -1   -1.00    1.80
  -4   0  -1    2.50    1.80
  -4   0  -1    1.10    2.00
   4   0   1    2.10    1.90
   4   0   1   -0.60    1.80
   4   0   1   -0.60    1.50
  -4   0  -1   -0.60    1.70
  -6   0  -1   -0.80    2.10
   6   0   1    1.60    2.10
   6   0   1    0.90    1.80
  -6   0  -1    1.60    2.20
  -6   0  -1    2.30    2.10
  -6   0  -1   -1.50    2.20
   6   0   1    1.20    1.80
  -6   0  -1   -0.40    2.00
   6   0   1    0.40    2.20
  -8   0  -1    3.80    2.40
  -8   0  -1   -0.80    2.40
   8   0   1    1.80    2.00
  -8   0  -1    1.10    2.20
  -8   0  -1    0.30    2.20
   8   0   1    0.30    1.90
  -8   0  -1    0.60    2.20
 -10   0  -1    1.60    2.50
 -10   0  -1    1.00    2.40
 -10   0  -1   -1.40    2.50
  10   0   1   -0.10    1.90
 -10   0  -1   -1.70    2.30
  10   0   1   -1.20    1.90
 -10   0  -1    2.10    2.50
 -12   0  -1   -0.60    2.50
 -12   0  -1   -1.50    2.40
  12   0   1    1.00    1.90
 -12   0  -1    3.50    2.90
  12   0   1    0.00    2.00
 -12   0  -1    1.20    2.60
 -12   0  -1    0.60    2.50
 -14   0  -1    2.20    2.80
 -14   0  -1   -2.10    2.70
 -14   0  -1    3.00    2.90
 -14   0  -1    1.70    2.80
  14   0   1    1.70    2.40
  14   0   1    0.20    2.10
 -14   0  -1   -0.70    2.80
 -16   0  -1   -4.20    3.60
  16   0   1    1.90    2.40
 -16   0  -1    4.20    3.30
 -16   0  -1    2.80    3.20
  16   0   1    0.40    2.40
 -16   0  -1   -0.40    3.10
 -16   0  -1    1.20    3.60
 -18   0  -1    2.20    3.90
 -18   0  -1    3.70    4.90
 -18   0  -1    3.60    2.30
 -18   0  -1    6.70    4.40
 -18   0  -1    1.60    3.70
 -20   0  -1    5.10    4.50
 -20   0  -1    1.50    4.30
 -20   0  -1    8.00    3.90
 -20   0  -1    2.70    2.90
 -20   0  -1   -0.60    3.70
 -22   0  -1   -0.10    4.70
 -22   0  -1   -1.60    3.80
 -22   0  -1   10.10    4.60
 -22   0  -1   -2.70    4.80
 -24   0  -1    0.70    5.00
 -24   0  -1   -0.10    6.00
 -24   0  -1    8.10    5.40
 -26   0  -1    1.50    6.30
 -26   0  -1  -11.50    6.90
 -26   0  -1    0.20    5.90
 -28   0  -1    8.00    6.20
 -28   0  -1   -1.90    5.40
 -30   0  -1    2.80    5.90
 -30   0  -1   -6.50    5.40
 -32   0  -1    6.40    8.20
 -32   0  -1    0.10   10.30
 -33  -1   1   22.50    7.50
 -33  -1   1   26.00    8.30
 -33   1   1   13.40    7.00
 -33   1   1   23.90    7.40
 -31  -1   1   30.20    7.90
 -31  -1   1   19.00    6.90
 -31   1   1   13.10    7.10
 -31   1   1   35.80    7.10
 -29  -1   1   26.90    7.20
 -29  -1   1   24.50    7.60
 -29   1   1   10.10    5.80
 -29   1   1   32.90    7.40
 -27  -1   1   25.90    9.50
 -27  -1   1   28.80    7.50
 -27   1   1   40.70    7.00
 -27   1   1   36.30   10.40
 -27   1   1   36.90    7.00
 -25  -1   1    6.70    5.40
 -25  -1   1    4.20    5.10
 -25   1   1   17.40    5.70
 -25   1   1    1.20    5.10
 -25   1   1   13.20    5.60
 -25   1   1   10.20    5.10
 -23  -1   1   55.09    7.30
 -23  -1   1   49.90    7.40
 -23   1   1   44.20    6.80
 -23   1   1   50.69    6.60
 -23   1   1   54.19    6.70
 -21  -1   1   77.09    7.20
 -21  -1   1   65.49    7.20
 -21  -1   1   66.29    7.90
 -21   1   1   69.89    6.90
 -21   1   1   65.49    7.10
 -21   1   1   69.19    7.10
 -21   1   1   60.29    6.80
 -19  -1   1   53.69    6.90
 -19  -1   1   64.49    6.90
 -19  -1   1   52.49    6.60
 -19  -1   1   57.29    6.70
 -19   1   1   51.19    5.70
 -19   1   1   39.70    5.50
 -19   1   1   48.70    5.60
 -19   1   1   44.10    5.70
 -17  -1   1   26.20    4.90
 -17  -1   1   30.20    5.40
  17  -1  -1   30.30    3.60
 -17  -1   1   27.90    5.20
 -17   1   1   26.90    4.60
 -17   1   1   24.80    4.40
 -17   1   1   28.30    4.40
 -17   1   1   33.00    4.70
  17   1  -1   28.70    4.60
  15  -1  -1   41.80    4.00
 -15  -1   1   44.70    5.20
 -15  -1   1   46.10    5.70
 -15  -1   1   39.40    5.10
 -15  -1   1   50.89    5.50
  15  -1  -1   40.60    3.90
 -15  -1   1   45.20    5.30
 -15   1   1   44.40    5.00
  15   1  -1   41.80    4.90
 -15   1   1   48.80    4.80
  15   1  -1   52.39    5.60
 -15   1   1   44.10    3.90
 -13  -1   1  358.76   13.90
 -13  -1   1  368.66   12.90
  13  -1  -1  364.06   11.30
 -13  -1   1  361.86   13.20
  13  -1  -1  366.16   11.50
 -13  -1   1  379.66   13.40
 -13  -1   1  345.17   12.90
 -13   1   1  366.06   11.90
  13   1  -1  370.86   12.70
 -13   1   1  331.87   10.80
 -13   1   1  369.16   12.20
  13   1  -1  360.36   13.40
 -11  -1   1  251.27    9.80
 -11  -1   1  237.98    9.50
 -11  -1   1  250.57    9.60
 -11  -1   1  244.38    9.50
  11  -1  -1  248.28    8.20
 -11  -1   1  247.78    9.80
  11  -1  -1  259.57    8.20
  11   1  -1  249.08    9.60
  11   1  -1  253.37    9.40
 -11   1   1  214.28    8.60
 -11   1   1  267.37    8.40
  11   1  -1  249.28   10.00
 -11   1   1  247.98    8.80
 -11   1   1  243.28    8.70
  -9  -1   1   67.09    5.00
  -9  -1   1   81.59    5.00
   9  -1  -1   67.99    3.50
  -9  -1   1   67.89    4.90
  -9  -1   1   68.59    4.90
   9  -1  -1   65.39    3.50
   9  -1  -1   62.39    3.80
  -9  -1   1   84.19    5.30
   9   1  -1   72.69    4.80
   9   1  -1   71.39    5.40
  -9   1   1   60.79    3.90
  -9   1   1   67.39    4.00
  -9   1   1   66.99    4.10
   9   1  -1   67.49    5.70
   7  -1  -1  878.71   24.30
  -7  -1   1  873.11   24.60
  -7  -1   1  958.70   25.70
  -7  -1   1  903.71   25.10
   7  -1  -1  908.81   23.90
   7  -1  -1  926.11   24.00
  -7  -1   1  894.11   25.30
  -7  -1   1  890.71   25.10
  -7  -1   1  821.22   26.80
  -7   1   1  891.31   24.10
  -7   1   1  886.91   24.20
   7   1  -1  899.81   25.30
   7   1  -1  895.81   25.20
  -7   1   1  872.91   24.30
  -7   1   1  833.82   24.60
   7   1  -1  859.11   25.40
   7   1  -1  899.21   25.10
  -5  -1   1   67.69    4.20
   5  -1  -1   65.09    3.90
   5  -1  -1   66.69    2.80
   5  -1  -1   65.59    2.70
   5  -1  -1   62.49    3.30
  -5  -1   1   65.79    4.10
  -5  -1   1   68.29    4.20
  -5  -1   1   64.29    4.10
  -5  -1   1   70.39    4.10
   5  -1  -1   64.19    2.80
  -5  -1   1   62.09    4.30
  -5   1   1   62.99    3.60
   5   1  -1   60.29    4.00
   5   1  -1   65.19    4.80
  -5   1   1   67.39    3.20
   5   1  -1   68.89    4.10
  -5   1   1   70.79    3.20
   5   1  -1   64.89    4.80
  -5   1   1   65.79    3.30
   5   1  -1   63.19    4.30
  -3  -1   1 1103.49   29.50
  -3  -1   1 1114.89   29.40
   3  -1  -1 1078.69   29.10
   3  -1  -1 1116.69   28.90
   3  -1  -1 1069.29   28.80
  -3  -1   1 1111.29   29.50
   3  -1  -1 1064.79   28.80
  -3  -1   1 1096.59   29.70
   3  -1  -1 1016.30   28.80
   3  -1  -1 1040.10   29.60
  -3  -1   1 1104.19   29.40
   3   1  -1 1126.29   29.60
   3   1  -1 1106.19   29.40
  -3   1   1 1077.19   28.90
  -3   1   1 1079.99   29.00
  -3   1   1 1108.79   29.00
  -3   1   1 1100.19   29.10
  -3   1   1 1053.69   29.00
   3   1  -1 1121.89   29.70
   3   1  -1 1106.29   29.50
   3   1  -1 1096.69   29.50
  -1  -1   1 3905.01  104.19
   1  -1  -1 3966.20  104.19
  -1  -1   1 3959.40  104.09
  -1  -1   1 4089.29  104.19
   1  -1  -1 3908.51  104.29
  -1  -1   1 4083.69  104.49
  -1  -1   1 4041.50  104.89
  -1  -1   1 3985.80  104.59
   1  -1  -1 3966.60  104.19
   1   1  -1 4056.09  104.29
  -1   1   1 3954.50  104.29
   1   1  -1 4018.20  104.19
   1   1  -1 4056.79  104.49
  -1   1   1 4029.80  104.39
   1   1  -1 4014.70  104.39
   1   1  -1 4010.40  104.29
  -1   1   1 4010.80  104.79
  -1   1   1 3931.81  104.29
  -1   1   1 3935.71  104.29
  -1  -1  -1 2696.23   71.69
  -1  -1  -1 2795.92   71.99
  -1  -1  -1 2785.12   71.59
  -1  -1  -1 2710.83   71.49
   1  -1   1 2715.73   71.99
   1  -1   1 2646.24   71.59
   1   1   1 2699.13   71.69
   1   1   1 2681.63   71.59
  -1   1  -1 2697.13   72.19
  -1   1  -1 2780.72   71.59
   1   1   1 2743.13   71.59
   1   1   1 2801.92   71.99
   1   1   1 2692.63   71.79
  -1   1  -1 2678.23   71.49
  -3  -1  -1   37.70    3.30
  -3  -1  -1   31.30    2.90
  -3  -1  -1   33.30    3.40
  -3  -1  -1   31.70    3.30
   3  -1   1   33.10    3.30
  -3  -1  -1   35.60    3.10
   3  -1   1   29.40    2.80
   3   1   1   34.00    3.40
   3   1   1   37.40    3.20
  -3   1  -1   31.20    3.20
   3   1   1   30.30    3.40
  -3   1  -1   30.50    2.70
   3   1   1   34.30    3.20
   3   1   1   29.40    2.90
   5  -1   1   41.20    3.40
  -5  -1  -1   39.40    3.80
  -5  -1  -1   36.70    3.70
   5  -1   1   37.70    3.50
  -5  -1  -1   39.60    3.70
   5   1   1   42.40    3.70
  -5   1  -1   36.00    3.20
  -5   1  -1   31.40    2.10
   5   1   1   36.10    3.40
   5   1   1   40.60    4.00
   5   1   1   39.80    4.10
  -5   1  -1   38.60    3.40
   5   1   1   34.80    3.60
  -7  -1  -1  193.78    7.70
  -7  -1  -1  197.88    7.80
  -7  -1  -1  195.88    7.80
  -7  -1  -1  197.78    7.70
   7  -1   1  201.38    7.20
   7   1   1  200.98    8.20
   7   1   1  200.88    8.10
   7   1   1  201.38    7.60
   7   1   1  194.68    7.90
   7   1   1  203.98    7.80
  -7   1  -1  185.18    6.40
  -7   1  -1  202.88    6.40
  -7   1  -1  198.08    6.90
  -7   1  -1  180.48    6.90
   9  -1   1  124.59    4.50
  -9  -1  -1  127.79    6.40
  -9  -1  -1  118.79    6.40
  -9  -1  -1  122.39    6.40
  -9  -1  -1  130.89    6.50
  -9  -1  -1  129.99    6.50
   9   1   1  118.89    6.00
  -9   1  -1  120.79    5.30
   9   1   1  118.89    6.60
  -9   1  -1  118.19    5.30
   9   1   1  123.59    6.20
  -9   1  -1  126.29    5.30
   9   1   1  133.49    6.80
  -9   1  -1  117.79    5.00
  -9   1  -1  118.79    5.30
  -9   1  -1  124.99    5.20
   9   1   1  125.59    6.90
 -11  -1  -1  375.86   13.20
 -11  -1  -1  392.26   13.20
 -11  -1  -1  382.66   13.40
  11  -1   1  383.56   11.40
 -11  -1  -1  395.76   13.50
 -11  -1  -1  394.96   13.20
  11   1   1  382.56   13.40
 -11   1  -1  388.16   12.10
  11   1   1  372.96   13.10
  11   1   1  387.16   13.70
  11   1   1  396.66   13.70
 -11   1  -1  374.96   12.20
 -11   1  -1  383.26   12.40
 -11   1  -1  384.66   12.50
 -11   1  -1  368.96   12.10
 -11   1  -1  383.16   12.20
  13  -1   1   38.90    3.20
 -13  -1  -1   51.79    5.50
  13  -1   1   37.30    3.20
 -13  -1  -1   45.20    5.20
 -13  -1  -1   38.80    5.60
 -13  -1  -1   54.49    5.40
 -13  -1  -1   47.70    4.90
  13   1   1   47.10    4.60
 -13   1  -1   44.60    4.20
 -13   1  -1   38.00    4.40
 -13   1  -1   42.50    3.60
  13   1   1   49.80    5.90
  13   1   1   42.30    5.10
  13   1   1   46.70    4.80
 -13   1  -1   42.40    4.30
 -13   1  -1   43.40    4.40
 -15  -1  -1   80.49    6.50
 -15  -1  -1   83.89    6.40
 -15  -1  -1   99.09    7.10
  15  -1   1   91.49    4.70
 -15  -1  -1   89.69    6.80
 -15  -1  -1   93.19    6.80
 -15   1  -1   90.79    5.80
 -15   1  -1   88.49    5.90
 -15   1  -1   96.59    6.20
 -15   1  -1   87.39    4.90
  15   1   1   89.29    6.20
  15   1   1   83.19    6.10
  17  -1   1   28.30    3.60
 -17  -1  -1   32.10    5.30
 -17  -1  -1   33.10    5.10
 -17  -1  -1   39.30    5.90
 -17  -1  -1   26.70    5.40
 -17   1  -1   25.50    4.70
 -17   1  -1   35.30    4.50
 -17   1  -1   30.60    4.70
 -17   1  -1   31.40    3.60
 -17   1  -1   24.80    4.50
 -19  -1  -1   28.80    5.20
 -19  -1  -1   22.90    5.80
 -19  -1  -1   38.30    6.00
 -19   1  -1   25.90    4.70
 -19   1  -1   32.00    5.10
 -19   1  -1   24.40    5.10
 -19   1  -1   27.70    5.30
 -21  -1  -1   72.49    8.00
 -21  -1  -1   72.09    8.40
 -21  -1  -1   79.29    8.10
 -21   1  -1   78.09    7.40
 -21   1  -1   83.39    7.20
 -21   1  -1   64.89    7.00
 -21   1  -1   72.79    7.20
 -23  -1  -1   24.90    5.80
 -23  -1  -1   22.30    6.00
 -23   1  -1   11.30    4.90
 -23   1  -1   18.80    5.90
 -23   1  -1   19.70    5.60
 -23   1  -1   15.90    6.30
 -25  -1  -1   10.90    5.80
 -25  -1  -1   11.00    6.00
 -25   1  -1   14.40    5.90
 -25   1  -1   21.20    5.80
 -25   1  -1   21.90    8.90
 -25   1  -1   18.80    6.10
 -27  -1  -1   67.79    8.40
 -27  -1  -1   71.79   12.90
 -27   1  -1   70.29    8.60
 -27   1  -1   63.99    8.40
 -29  -1  -1   -0.80    6.10
 -29  -1  -1   -2.70    6.00
 -29   1  -1   15.80    6.40
 -29   1  -1   13.40    6.00
 -31  -1  -1   95.49   10.80
 -31  -1  -1  103.59   10.70
 -31   1  -1  111.59   10.60
 -31   1  -1  121.49   10.60
 -30  -2   1   41.50    7.80
 -30  -2   1   44.60    9.00
 -30   2   1   34.20    7.40
 -30   2   1   45.30    7.50
 -28  -2   1   27.60    6.60
 -28  -2   1   28.70   11.80
 -28   2   1   23.00    6.30
 -28   2   1   15.30    6.20
 -26  -2   1    7.40    5.90
 -26  -2   1    0.30    5.50
 -26   2   1    0.20    4.70
 -26   2   1    7.50    5.20
 -26   2   1    4.90    5.00
 -24  -2   1   -5.70    4.50
 -24  -2   1    3.10    4.90
 -24  -2   1    2.00    3.80
 -24   2   1   -1.80    4.50
 -24   2   1   -2.60    4.40
 -24   2   1   -2.10    4.30
 -22  -2   1   35.50    5.10
 -22  -2   1   35.80    6.70
 -22  -2   1   26.60    6.20
 -22   2   1   24.80    5.30
 -22   2   1   43.90    5.60
 -22   2   1   23.20    4.90
 -22   2   1   26.50    5.50
 -20  -2   1    9.20    4.10
 -20  -2   1    5.20    4.60
 -20  -2   1   -1.30    4.30
 -20   2   1   10.90    3.90
 -20   2   1    3.80    3.80
 -20   2   1    5.50    4.00
 -20   2   1    3.80    4.10
 -18  -2   1    9.10    4.50
 -18  -2   1    4.40    3.90
 -18  -2   1    6.40    4.70
 -18   2   1    4.10    3.10
 -18   2   1    0.90    3.60
 -18   2   1   -1.70    3.30
 -18   2   1   14.10    3.80
 -16  -2   1  594.64   20.90
 -16  -2   1  600.74   19.20
 -16  -2   1  598.14   20.40
 -16   2   1  588.64   18.90
  16   2  -1  610.44   21.00
 -16   2   1  615.94   18.70
 -14  -2   1  319.97   12.90
 -14  -2   1  313.57   12.50
 -14  -2   1  308.97   12.30
  14  -2  -1  298.27   10.90
 -14  -2   1  301.07   11.60
 -14  -2   1  297.77   12.50
 -14   2   1  306.97   10.90
 -14   2   1  324.07   10.80
  14   2  -1  296.97   13.10
  14   2  -1  294.77   15.60
 -12  -2   1   46.80    6.00
 -12  -2   1   46.50    5.30
 -12  -2   1   33.60    4.70
 -12  -2   1   38.90    4.60
 -12  -2   1   37.70    4.80
  12  -2  -1   41.70    4.30
  12   2  -1   44.70    5.40
  12   2  -1   45.90    5.90
 -12   2   1   35.00    3.60
 -12   2   1   35.30    3.50
 -12   2   1   37.90    4.00
  12   2  -1   41.70    4.80
 -10  -2   1    6.20    3.10
 -10  -2   1   -1.60    2.90
  10  -2  -1   10.90    2.90
 -10  -2   1    3.10    2.80
 -10  -2   1    7.50    3.40
 -10  -2   1    2.80    3.00
 -10  -2   1    6.70    2.90
  10   2  -1    6.80    3.60
  10   2  -1    3.40    3.70
  10   2  -1    3.90    3.30
  10   2  -1    0.50    2.60
  10   2  -1    3.40    3.20
  -8  -2   1  332.97   11.90
   8  -2  -1  329.17   11.40
   8  -2  -1  324.87   10.50
  -8  -2   1  330.67   11.60
  -8  -2   1  327.07   11.30
  -8  -2   1  333.37   11.60
  -8  -2   1  331.87   12.60
  -8  -2   1  327.77   11.40
   8   2  -1  323.57   11.90
  -8   2   1  321.07   10.10
   8   2  -1  318.07   11.70
   8   2  -1  327.97   11.40
  -8   2   1  299.87   10.60
   8   2  -1  338.17   12.20
  -8   2   1  330.07   10.00
   8   2  -1  326.47   11.80
   6  -2  -1  137.49    5.80
  -6  -2   1  136.09    7.00
   6  -2  -1  137.19    6.70
  -6  -2   1  139.89    6.40
  -6  -2   1  133.29    6.30
  -6  -2   1  145.29    7.00
  -6  -2   1  146.59    6.30
   6   2  -1  139.89    6.80
  -6   2   1  139.39    5.10
   6   2  -1  142.29    6.60
   6   2  -1  135.19    6.80
   6   2  -1  139.79    6.30
  -6   2   1  133.59    5.50
  -6   2   1  139.89    5.30
   6   2  -1  139.49    7.00
  -4  -2   1   66.29    4.30
   4  -2  -1   65.79    4.30
   4  -2  -1   77.69    5.30
  -4  -2   1   60.99    4.50
  -4  -2   1   56.39    3.90
  -4  -2   1   61.89    5.20
  -4  -2   1   62.89    4.10
  -4   2   1   77.79    5.40
   4   2  -1   61.19    4.60
  -4   2   1   83.59    3.70
   4   2  -1   58.59    4.40
  -4   2   1   73.99    3.50
   4   2  -1   63.89    4.90
  -4   2   1   75.09    4.00
   4   2  -1   56.19    4.60
   4   2  -1   62.39    4.30
  -4   2   1   70.49    3.80
  -2  -2   1    3.90    2.70
   2  -2  -1    7.20    2.90
   2  -2  -1    6.70    1.60
  -2  -2   1   11.30    2.10
  -2  -2   1   14.50    2.10
   2  -2  -1    6.20    1.60
  -2  -2   1    8.20    2.60
   2  -2  -1    9.40    2.40
  -2  -2   1   10.60    2.10
  -2  -2   1   10.00    2.90
   2   2  -1    7.80    2.40
   2   2  -1    4.60    2.80
  -2   2   1    5.90    2.00
  -2   2   1    3.70    2.10
  -2   2   1    5.60    1.90
  -2   2   1    7.60    3.20
   2   2  -1    8.60    2.50
  -2   2   1    6.50    2.20
   2   2  -1    8.40    2.40
   2   2  -1   14.90    2.40
   0  -2   1  176.38    8.10
   0  -2   1  186.98    7.40
   0   2  -1  185.88    6.30
   0   2  -1  179.78    6.50
   0   2  -1  184.48    7.40
   0   2  -1  184.68    6.70
   0   2  -1  190.08    6.50
   2  -2   1  311.37   10.00
  -2  -2  -1  278.87   10.40
  -2  -2  -1  285.97   10.80
  -2  -2  -1  283.47    9.40
  -2  -2  -1  292.57    9.50
  -2  -2  -1  287.17    9.50
   2  -2   1  305.77   10.70
  -2   2  -1  292.87    9.60
  -2   2  -1  286.67    8.60
  -2   2  -1  283.27    8.60
   2   2   1  278.27    9.60
   2   2   1  291.97    9.80
   2   2   1  274.97   10.00
   2   2   1  289.07   10.60
  -2   2  -1  305.47   10.10
   2   2   1  286.87    9.80
  -4  -2  -1  223.28    8.90
  -4  -2  -1  219.18    8.30
   4  -2   1  221.08    9.00
  -4  -2  -1  225.48    8.40
  -4  -2  -1  234.88    8.40
   4  -2   1  234.98    8.30
  -4  -2  -1  232.08    9.10
   4   2   1  236.08    9.30
  -4   2  -1  232.08    8.80
   4   2   1  223.78    8.90
   4   2   1  226.18    8.60
  -4   2  -1  226.38    8.10
   4   2   1  226.98    8.60
   4   2   1  224.28    8.40
   6  -2   1  730.53   21.80
  -6  -2  -1  731.83   21.50
  -6  -2  -1  696.33   21.70
   6  -2   1  728.23   21.10
  -6  -2  -1  741.33   24.20
  -6  -2  -1  741.13   21.60
   6   2   1  707.83   22.70
   6   2   1  722.63   22.10
   6   2   1  736.93   22.20
  -6   2  -1  711.83   20.90
   6   2   1  748.83   21.80
   6   2   1  723.33   21.80
  -8  -2  -1   70.49    5.60
  -8  -2  -1   82.79    5.60
  -8  -2  -1   76.09    5.50
   8  -2   1   73.19    5.20
  -8  -2  -1   69.79    5.10
   8  -2   1   70.39    4.80
  -8  -2  -1   76.69    5.30
  -8   2  -1   71.79    4.40
   8   2   1   76.59    6.20
   8   2   1   72.89    5.30
   8   2   1   69.19    5.70
   8   2   1   74.19    6.00
   8   2   1   75.49    6.30
 -10  -2  -1   15.10    3.80
  10  -2   1   10.60    3.20
 -10  -2  -1    9.60    3.60
 -10  -2  -1   11.60    3.10
 -10  -2  -1   14.70    3.90
  10   2   1   18.90    4.40
  10   2   1   15.00    3.60
  10   2   1   10.60    4.00
 -10   2  -1   11.20    2.10
  10   2   1   12.30    3.70
  12  -2   1  202.98    8.70
 -12  -2  -1  198.58    9.30
 -12  -2  -1  205.88    9.90
 -12  -2  -1  198.08    9.40
 -12  -2  -1  208.58    9.70
 -12  -2  -1  196.48    9.30
 -12   2  -1  207.78    7.30
  12   2   1  189.08   10.10
  12   2   1  194.18    9.80
 -12   2  -1  197.98    7.20
  12   2   1  211.38   11.80
  12   2   1  197.28    9.30
 -12   2  -1  200.18    7.50
 -14  -2  -1    9.80    3.70
 -14  -2  -1    2.60    4.00
 -14  -2  -1    0.40    3.70
 -14   2  -1    0.50    2.50
 -14   2  -1    1.30    2.50
  14   2   1    5.70    3.20
 -14   2  -1   -0.70    2.60
  14   2   1    1.40    4.30
 -14   2  -1    0.20    2.60
  14   2   1   -1.00    3.40
  14   2   1   -1.70    3.90
  14   2   1   -4.70    3.70
 -16  -2  -1    4.30    4.50
 -16  -2  -1    5.60    4.60
 -16   2  -1    5.50    3.10
 -16   2  -1    2.50    2.80
 -16   2  -1   -0.20    3.00
  16   2   1   -4.10    3.70
 -16   2  -1    1.00    3.20
  16   2   1    0.50    4.40
 -18  -2  -1   14.80    5.70
 -18  -2  -1   20.60    5.10
 -18   2  -1   13.20    4.00
 -18   2  -1   13.10    4.00
 -18   2  -1   13.30    3.70
 -18   2  -1   17.10    4.20
 -20  -2  -1    4.70    4.80
 -20  -2  -1    5.40    4.30
 -20   2  -1    6.20    3.40
 -20   2  -1   -0.30    3.60
 -20   2  -1    2.40    3.80
 -20   2  -1    0.60    3.90
 -22  -2  -1   26.10    6.50
 -22  -2  -1   21.70    6.00
 -22  -2  -1   27.00    5.50
 -22   2  -1   22.10    5.10
 -22   2  -1   14.10    4.70
 -22   2  -1   20.80    5.30
 -24  -2  -1    2.60    5.20
 -24  -2  -1   -2.30    4.20
 -24  -2  -1    2.30    5.50
 -24   2  -1   -2.70    4.40
 -24   2  -1    2.10    4.50
 -24   2  -1    8.10    4.50
 -24   2  -1    2.40    4.80
 -26  -2  -1    7.20    4.40
 -26  -2  -1    1.40    6.20
 -26  -2  -1  -11.30    4.90
 -26   2  -1    4.20    5.00
 -26   2  -1    4.20    4.80
 -28  -2  -1   95.69   10.40
 -28  -2  -1  122.19    8.30
 -28  -2  -1  104.89   12.00
 -28   2  -1   97.59    9.70
 -28   2  -1  121.89    9.60
 -30  -2  -1   23.30    7.40
 -30  -2  -1   36.60    8.00
 -30   2  -1   25.10    6.60
 -29  -3   1  -10.90    7.00
 -29  -3   1   -4.10    6.10
 -29   3   1    3.30    6.40
 -29   3   1    5.30    5.50
 -27  -3   1   92.49   11.00
 -27  -3   1   60.69    9.20
 -27  -3   1  108.99   11.90
 -27   3   1   93.69    8.40
 -27   3   1  101.19    8.60
 -25  -3   1    5.00    6.40
 -25  -3   1    5.50    5.50
 -25  -3   1   16.40    6.60
 -25   3   1   -0.80    4.70
 -25   3   1    5.90    4.80
 -25   3   1   14.80    4.90
 -23  -3   1   17.00    5.10
 -23  -3   1    5.30    5.20
 -23  -3   1    0.80    4.70
 -23   3   1    6.60    4.00
 -23   3   1    6.40    4.00
 -23   3   1    7.10    4.60
 -23   3   1    8.90    4.60
 -21  -3   1   15.40    5.20
 -21  -3   1    3.90    4.80
 -21  -3   1    8.60    5.90
 -21   3   1   14.40    4.10
 -21   3   1   20.30    4.40
 -21   3   1    6.00    4.10
 -21   3   1   12.00    4.20
 -19  -3   1    4.30    4.70
 -19  -3   1    2.20    4.50
 -19  -3   1    3.70    4.80
 -19   3   1    9.40    3.70
 -19   3   1    4.60    3.80
 -19   3   1    9.60    3.90
 -19   3   1    7.70    3.50
 -17  -3   1  333.87   14.10
 -17  -3   1  328.27   14.80
  17  -3  -1  308.47   12.80
  17   3  -1  323.17   14.70
  17   3  -1  322.47   15.10
 -17   3   1  310.47   11.80
 -17   3   1  330.07   11.60
 -15  -3   1   11.20    4.60
  15  -3  -1   12.50    4.40
 -15  -3   1   15.70    5.00
 -15  -3   1   19.00    5.00
  15   3  -1   11.10    5.30
 -15   3   1   12.00    3.40
  15   3  -1   28.00    5.20
 -15   3   1   12.50    3.40
 -13  -3   1    9.40    4.20
 -13  -3   1    8.50    4.40
 -13  -3   1    1.20    3.40
  13  -3  -1   -2.40    3.80
  13   3  -1    7.20    6.20
  13   3  -1   -3.50    4.40
  13   3  -1   -3.10    3.50
 -13   3   1    5.90    3.00
 -11  -3   1   46.70    6.20
 -11  -3   1   45.30    5.40
  11  -3  -1   32.50    5.30
  11  -3  -1   38.20    4.50
 -11  -3   1   41.80    5.50
  11   3  -1   41.30    5.70
 -11   3   1   33.80    3.60
 -11   3   1   42.90    6.20
  11   3  -1   31.00    5.80
  11   3  -1   35.80    5.20
  11   3  -1   35.60    5.90
  -9  -3   1   11.90    4.30
  -9  -3   1   13.50    4.00
   9  -3  -1   15.90    3.80
  -9  -3   1   15.10    3.80
   9  -3  -1    8.10    4.10
  -9  -3   1    9.20    3.60
   9   3  -1    8.50    4.30
   9   3  -1   13.30    3.70
   9   3  -1   12.30    4.10
   9   3  -1    7.50    4.40
  -9   3   1   13.80    4.70
  -9   3   1    8.70    2.80
   9   3  -1   10.30    5.10
  -7  -3   1  425.66   15.30
   7  -3  -1  387.36   13.40
  -7  -3   1  408.06   13.50
   7  -3  -1  399.06   15.00
  -7  -3   1  392.46   14.20
  -7  -3   1  389.36   14.50
  -7  -3   1  395.36   15.60
   7   3  -1  398.26   14.50
   7   3  -1  394.96   14.60
   7   3  -1  403.16   15.00
  -7   3   1  427.76   14.30
   7   3  -1  382.56   14.60
  -7   3   1  402.86   14.90
   7   3  -1  399.76   14.20
   5  -3  -1    5.40    4.20
  -5  -3   1    2.20    2.60
  -5  -3   1    3.80    2.40
  -5  -3   1    4.70    3.30
  -5  -3   1   -1.70    3.60
  -5  -3   1   -0.20    3.20
   5  -3  -1   -0.80    3.00
  -5  -3   1   -1.50    2.20
  -5  -3   1    5.10    2.60
  -5   3   1    5.20    2.70
   5   3  -1    2.40    3.00
  -5   3   1    3.90    2.20
   5   3  -1    3.80    3.60
   5   3  -1    4.30    6.10
   5   3  -1   -2.50    2.60
  -5   3   1    4.60    4.20
  -5   3   1    2.70    2.10
  -5   3   1    8.50    2.60
   5   3  -1   -2.70    3.30
  -3  -3   1   81.19    5.80
  -3  -3   1   79.29    6.80
  -3  -3   1   63.89    5.80
   3  -3  -1   53.19    5.10
  -3  -3   1   65.89    3.90
  -3  -3   1   69.09    4.10
  -3  -3   1   70.29    4.20
  -3  -3   1   57.79    3.90
   3  -3  -1   56.59    5.90
   3   3  -1   81.99    5.60
  -3   3   1   52.59    6.10
   3   3  -1   57.89    5.10
   3   3  -1   62.39    4.90
  -3   3   1   51.29    4.50
   3   3  -1   87.99    6.50
  -3   3   1   53.79    4.10
  -3   3   1   54.49    4.50
  -3   3   1   55.59    4.30
   1  -3  -1   19.50    4.70
  -1  -3   1   15.00    3.90
   1  -3  -1   19.40    3.80
   1  -3  -1   22.90    2.20
  -1  -3   1   15.60    4.40
  -1   3   1   17.90    3.50
   1   3  -1   21.10    4.30
  -1   3   1   18.20    3.10
  -1   3   1   26.40    3.30
   1   3  -1   21.90    3.50
  -1   3   1   19.40    4.30
   1   3  -1   20.60    3.40
  -1   3   1   22.40    3.40
   1   3  -1   20.90    3.30
   1   3  -1   26.50    3.80
  -1  -3  -1    0.20    2.00
  -1  -3  -1    6.00    2.20
  -1  -3  -1   -2.70    3.00
  -1  -3  -1    2.60    3.50
  -1  -3  -1    1.40    2.10
   1  -3   1    0.90    3.50
  -1  -3  -1    2.30    2.20
   1  -3   1    0.60    3.20
   1   3   1   -2.60    2.30
   1   3   1   -3.20    4.90
   1   3   1    0.70    3.60
  -1   3  -1   -0.90    2.20
   1   3   1    1.70    2.60
  -1   3  -1    0.30    2.20
  -1   3  -1    0.80    2.10
   1   3   1    6.30    2.90
  -1   3  -1   -1.50    2.50
  -1   3  -1    2.90    3.30
  -3  -3  -1  373.06   12.60
   3  -3   1  399.76   14.80
  -3  -3  -1  403.36   14.90
  -3  -3  -1  407.36   12.80
   3  -3   1  393.16   13.70
  -3  -3  -1  368.96   12.70
  -3  -3  -1  404.76   12.90
  -3  -3  -1  394.76   13.80
  -3  -3  -1  389.36   14.90
  -3   3  -1  387.06   11.90
   3   3   1  385.16   13.20
  -3   3  -1  384.16   12.10
   3   3   1  391.06   14.50
   3   3   1  384.06   14.90
   3   3   1  386.16   13.50
  -3   3  -1  399.96   14.00
  -5  -3  -1   76.69    7.30
   5  -3   1   71.39    6.90
  -5  -3  -1   64.49    5.20
  -5  -3  -1   63.29    4.80
  -5  -3  -1   53.39    5.90
   5  -3   1   63.19    5.60
   5   3   1   65.99    6.60
   5   3   1   63.99    5.90
   5   3   1   63.19    6.20
   5   3   1   67.79    5.70
  -5   3  -1   69.59    6.30
   7  -3   1   13.60    4.30
  -7  -3  -1   20.50    4.00
  -7  -3  -1   18.10    4.60
  -7  -3  -1   13.60    4.00
   7  -3   1   12.50    3.80
  -7  -3  -1   15.70    3.90
   7   3   1   16.40    5.00
   7   3   1   18.90    4.10
   7   3   1   17.10    3.80
   7   3   1   10.60    3.90
  -7   3  -1   14.10    4.40
   7   3   1   14.50    4.50
   9  -3   1   17.80    4.40
  -9  -3  -1   15.60    4.40
   9  -3   1   15.80    3.90
  -9  -3  -1   16.00    4.90
  -9  -3  -1   16.50    4.10
   9   3   1   16.10    4.90
   9   3   1   13.60    4.80
   9   3   1   19.30    4.50
  -9   3  -1   15.70    4.70
   9   3   1   10.40    4.30
 -11  -3  -1   20.70    4.90
 -11  -3  -1   23.30    5.40
  11  -3   1   27.00    5.30
 -11  -3  -1   26.60    5.20
  11  -3   1   22.10    4.10
  11   3   1   31.50    5.00
  11   3   1   19.80    5.20
  11   3   1   21.40    5.50
  11   3   1   17.10    4.50
  11   3   1   23.50    5.90
 -13  -3  -1  484.65   18.30
  13  -3   1  485.85   17.50
 -13  -3  -1  487.25   17.90
 -13  -3  -1  496.75   18.10
  13   3   1  473.85   18.10
  13   3   1  480.85   18.70
  13   3   1  468.45   17.90
  13   3   1  497.45   19.20
  13   3   1  486.35   18.70
 -15  -3  -1  164.28   10.30
 -15  -3  -1  158.18   10.10
 -15  -3  -1  178.58   10.50
  15  -3   1  166.08    9.70
  15   3   1  161.28   11.00
  15   3   1  157.08   10.20
 -15   3  -1  162.28    7.00
 -15   3  -1  167.38    7.00
  15   3   1  161.38   11.20
  15   3   1  170.28   11.00
 -17  -3  -1  209.88   11.60
 -17  -3  -1  201.38   11.40
 -17  -3  -1  215.48   12.20
 -17   3  -1  196.48    8.40
  17   3   1  192.98   12.30
 -17   3  -1  206.78    8.70
 -19  -3  -1   -0.80    4.30
 -19  -3  -1    3.30    5.50
 -19  -3  -1    1.20    4.50
 -19   3  -1    3.40    3.10
 -19   3  -1    8.10    3.90
  19   3   1  -10.70    5.30
 -21  -3  -1   10.30    8.80
 -21  -3  -1   15.10    5.90
 -21  -3  -1   10.40    6.00
 -21   3  -1   19.50    4.70
 -21   3  -1   15.90    4.10
 -21   3  -1   10.40    3.60
 -21   3  -1   12.80    4.10
 -23  -3  -1   11.60    5.60
 -23  -3  -1    4.30    5.60
 -23  -3  -1   18.80    5.40
 -23   3  -1    7.00    3.70
 -23   3  -1   10.40    4.30
 -25  -3  -1    7.60    6.60
 -25  -3  -1    6.30    4.80
 -25  -3  -1   -1.50    5.90
 -25   3  -1    6.40    4.30
 -25   3  -1   15.10    5.10
 -25   3  -1    3.50    4.40
 -27  -3  -1   38.40    7.90
 -27  -3  -1   58.19    7.40
 -27  -3  -1   36.50    7.90
 -27   3  -1   54.19    7.30
 -27   3  -1   31.60    6.00
 -24  -4   1    9.50    6.20
 -24  -4   1    9.20    7.80
 -24   4   1   13.80    7.60
 -22  -4   1   13.00    5.60
 -22  -4   1   -7.00    9.20
 -22  -4   1   -6.90    5.60
 -22   4   1    1.60    6.70
 -22   4   1    2.90    3.20
 -22   4   1    4.20    3.30
 -20  -4   1    7.20    5.40
 -20  -4   1   13.30    6.40
 -20  -4   1    6.60    5.10
  20   4  -1   -9.00    5.40
 -20   4   1   14.60    7.30
  18  -4  -1  -11.70    4.20
 -18  -4   1   -3.60    4.10
 -18  -4   1   -3.00    5.20
 -18  -4   1   -1.80    4.50
 -16  -4   1   36.50    6.00
 -16  -4   1   37.40    6.10
 -16  -4   1   39.00    7.90
 -16   4   1   39.70    8.10
  16   4  -1   30.50    7.90
 -14  -4   1   -0.30    4.70
  14  -4  -1   -1.40    5.00
 -14  -4   1    7.40    6.10
  14   4  -1   -1.90    5.30
  14   4  -1   -7.40    5.50
 -14   4   1    9.70    6.20
 -12  -4   1   22.50    5.90
 -12  -4   1   26.10    6.50
  12  -4  -1   21.70    6.00
  12  -4  -1   22.90    4.70
 -12  -4   1   25.90    4.60
  12   4  -1   19.50    6.40
 -12   4   1   14.30    6.30
  12   4  -1   19.40    5.70
  12   4  -1   33.70    6.10
  10  -4  -1   10.10    4.30
 -10  -4   1   14.30    3.70
  10  -4  -1   11.30    5.60
 -10  -4   1   13.70    5.70
 -10  -4   1   13.30    3.90
 -10  -4   1    1.70    5.20
  10   4  -1   12.30    4.70
 -10   4   1   15.90    3.40
  10   4  -1    6.00    4.90
 -10   4   1   10.10    5.80
  10   4  -1    7.70    5.50
  10   4  -1   20.00    6.10
  -8  -4   1    2.60    4.50
  -8  -4   1    5.50    8.50
   8  -4  -1    3.60    5.30
   8  -4  -1    3.90    3.90
  -8  -4   1   10.10    3.10
  -8  -4   1   -0.20    2.60
   8   4  -1    9.40    3.90
   8   4  -1    3.80    5.00
   8   4  -1    9.40    4.80
  -8   4   1    1.10    5.20
  -8   4   1    7.00    3.10
   8   4  -1    7.70    4.80
   6  -4  -1   47.80    7.30
  -6  -4   1   41.80    4.50
  -6  -4   1   46.00    7.60
   6  -4  -1   49.50    5.90
  -6  -4   1   38.00    6.20
  -6  -4   1   47.90    4.20
   6   4  -1   42.10    6.10
  -6   4   1   54.29    7.30
   6   4  -1   51.59    6.80
   6   4  -1   40.70    6.60
   6   4  -1   40.70    6.40
   6   4  -1   45.50    5.50
  -6   4   1   45.10    5.40
  -4  -4   1    5.30    5.20
  -4  -4   1    0.90    4.20
   4  -4  -1   11.30    5.50
   4  -4  -1   14.30    4.70
   4   4  -1    3.10    3.50
   4   4  -1   10.90    5.10
  -4   4   1   15.40    3.40
   4   4  -1   12.80    4.00
   4   4  -1    6.30    4.50
  -4   4   1   11.70    2.90
  -4   4   1    5.90    3.50
  -4   4   1    8.10    3.40
   4   4  -1   11.80    4.50
  -4   4   1    9.20    4.90
  -2  -4   1   26.40    6.40
   2  -4  -1   30.30    6.20
   2  -4  -1   36.10    5.50
   2   4  -1   35.00    6.20
   2   4  -1   36.40    5.60
  -2   4   1   38.30    6.50
  -2   4   1   28.10    4.20
  -2   4   1   34.60    5.10
   2   4  -1   40.10    4.60
   2   4  -1   44.70    5.40
  -2   4   1   31.60    4.60
   2   4  -1   38.10    7.90
  -2   4   1   30.70    4.40
   0  -4  -1   32.80    7.00
   0  -4  -1   19.10    4.80
   0  -4   1   19.00    5.00
   0  -4   1   21.30    6.10
   0   4  -1   28.20    5.80
   0   4   1   27.70    5.00
   0   4   1   26.80    6.10
   0   4  -1   27.30    4.70
   0   4  -1   22.80    4.10
   0   4  -1   26.20    4.10
   0   4   1   21.00    4.10
   0   4  -1   24.90    3.90
   0   4   1   24.90    5.40
   0   4   1   17.10    4.20
   2  -4   1   25.40    5.30
   2  -4   1   32.10    6.50
  -2  -4  -1   19.10    4.80
  -2  -4  -1   27.00    6.30
  -2  -4  -1   21.30    5.30
  -2   4  -1   23.80    3.90
  -2   4  -1   34.00    5.90
   2   4   1   27.70    4.50
   2   4   1   21.80    5.00
   2   4   1   23.50    5.70
   2   4   1   18.30    4.70
  -2   4  -1   18.50    3.20
  -2   4  -1   19.00    4.10
  -2   4  -1   21.70    3.70
   2   4   1   20.70    4.30
  -4  -4  -1   16.10    3.90
  -4  -4  -1    7.80    3.00
   4  -4   1   15.20    4.80
  -4  -4  -1    5.50    5.10
  -4  -4  -1   20.90    6.40
   4  -4   1    4.30    5.20
  -4   4  -1   22.00    5.50
   4   4   1   13.70    5.20
  -4   4  -1   14.80    3.00
   4   4   1   15.60    4.50
   4   4   1    7.50    4.90
  -4   4  -1   13.40    3.30
   4   4   1   12.30    4.50
   4   4   1   15.30    4.80
   6  -4   1   31.00    5.70
  -6  -4  -1   38.90    6.00
  -6  -4  -1   37.50    4.60
   6  -4   1   32.00    6.90
  -6  -4  -1   31.60   10.20
  -6  -4  -1   35.30    4.30
   6   4   1   37.00    6.50
  -6   4  -1   38.90    6.40
   6   4   1   45.40    5.70
   6   4   1   45.10    5.80
   6   4   1   41.10    6.60
   6   4   1   40.50    6.10
  -8  -4  -1  101.19   11.30
  -8  -4  -1  105.79    7.10
  -8  -4  -1  106.29    8.90
  -8  -4  -1  106.69    7.00
   8  -4   1  100.79    9.40
  -8   4  -1  104.39    8.90
   8   4   1  113.49    9.50
   8   4   1  113.59    8.90
   8   4   1  106.39    9.40
   8   4   1  106.69    8.60
   8   4   1   95.49    8.20
 -10  -4  -1   11.80    4.30
 -10  -4  -1   10.30    5.50
  10  -4   1    8.00    6.90
  10  -4   1   20.60    5.10
  10   4   1   13.30    5.60
  10   4   1    6.50    5.50
  10   4   1   19.40    5.60
 -10   4  -1    3.70    5.30
  10   4   1   14.50    5.50
  10   4   1   17.00    6.20
 -12  -4  -1  168.38   11.80
 -12  -4  -1  161.38    9.60
  12  -4   1  163.18    9.50
  12   4   1  146.19   11.10
  12   4   1  166.78   11.80
  12   4   1  155.68   11.20
 -12   4  -1  160.58   10.70
  12   4   1  157.88   11.00
  14  -4   1   18.00    6.50
 -14  -4  -1   15.40    5.10
 -14  -4  -1   24.40    5.70
 -14  -4  -1   26.50    7.40
  14   4   1   22.60    6.80
 -14   4  -1   27.60    6.60
  14   4   1   31.00    7.00
  14   4   1   15.20    6.20
 -16  -4  -1   24.90    5.40
 -16  -4  -1   32.60    7.30
  16  -4   1   27.00    6.30
 -16  -4  -1   31.70    6.40
 -16   4  -1   21.30    7.10
 -18  -4  -1   19.70    6.20
 -18  -4  -1   20.50    7.10
 -18  -4  -1   23.50    6.10
 -18   4  -1   23.60    8.50
  18   4   1   17.70    6.90
 -20  -4  -1   46.00    7.50
 -20  -4  -1   39.50    7.60
 -20  -4  -1   46.40    7.40
 -20   4  -1   39.10    8.60
  20   4   1   48.80    8.80
 -22  -4  -1    5.30    5.80
 -22  -4  -1    1.50    6.20
 -22  -4  -1    3.70    6.70
 -22   4  -1    2.10    6.30
 -24  -4  -1    9.30    6.40
 -24  -4  -1   -2.00    5.80
 -19  -5   1    2.10    6.30
 -19  -5   1   -5.00    6.40
  19  -5  -1    8.50    6.70
  19   5  -1    4.40    6.90
 -19   5   1    7.70    7.30
 -17  -5   1   19.20    8.40
  17  -5  -1    8.20    6.40
 -17  -5   1   -2.50    6.80
 -17   5   1   14.40    7.40
  17   5  -1   16.10    7.20
 -15  -5   1   58.69    9.80
  15  -5  -1   57.19    9.20
  15   5  -1   40.10    8.40
 -15   5   1   56.79    8.90
 -13  -5   1   86.29   11.60
 -13  -5   1   72.89    9.30
  13  -5  -1   71.69    7.70
  13  -5  -1   76.29    9.90
  13   5  -1   70.19    9.50
 -13   5   1   78.59   10.40
 -11  -5   1   70.19   10.30
  11  -5  -1   78.19   10.80
 -11  -5   1   73.69    9.30
  11  -5  -1   76.29    7.90
 -11   5   1   91.79   10.60
   9  -5  -1   26.80    7.20
  -9  -5   1   36.90    8.30
   9  -5  -1   19.10    5.30
  -9  -5   1   25.00    7.30
  -9   5   1   30.90    9.20
   9   5  -1   23.90    7.00
   7  -5  -1    5.80    4.80
  -7  -5   1    4.00    5.40
   7  -5  -1   -2.50    6.00
  -7  -5   1   -5.20    5.60
   7   5  -1   -0.20    5.80
  -7   5   1   -8.50    5.90
   5  -5  -1    9.20    6.30
  -5  -5   1   -4.80    5.60
  -5  -5   1   -1.90    5.20
   5  -5  -1    3.70    4.80
  -5   5   1    3.60    5.80
  -5   5   1    9.30    4.00
   5   5  -1   -0.60    4.40
   5   5  -1    8.50    5.50
   3  -5  -1   33.90    5.90
   3  -5  -1   35.50    8.70
  -3  -5   1   42.50    8.90
  -3  -5   1   38.90    7.00
  -3   5   1   37.10    5.00
   3   5  -1   38.10    5.70
  -3   5   1   27.80    5.00
   3   5  -1   40.80    5.20
  -3   5   1   37.60    7.90
   3   5  -1   32.50    7.50
  -3   5   1   37.20    4.60
  -1  -5   1    3.50    6.70
   1  -5  -1    4.20    4.60
  -1  -5   1    5.10    5.30
   1  -5  -1    2.90    5.60
  -1   5   1    5.70    3.60
   1   5  -1    3.60    5.80
  -1   5   1    8.90    6.50
  -1   5   1   10.50    5.30
   1   5  -1   -2.10    4.00
   1   5  -1    6.20    5.40
  -1   5   1    7.40    4.20
  -1   5   1    9.30    4.10
   1   5  -1    8.00    3.70
   1  -5   1   16.00    5.40
  -1  -5  -1    6.60    6.30
  -1  -5  -1    3.90    4.70
   1  -5   1   -1.10    5.90
   1   5   1    2.70    5.00
  -1   5  -1    5.80    3.90
   1   5   1    1.60    6.10
   1   5   1   10.00    4.50
   1   5   1    1.30    4.20
  -1   5  -1   12.60    6.20
   1   5   1   -1.00    4.30
  -3  -5  -1   18.70    7.50
   3  -5   1   18.50    7.80
  -3  -5  -1   11.60    5.20
   3  -5   1   16.30    5.60
  -3   5  -1   21.60    4.00
  -3   5  -1   17.20    5.80
   3   5   1    9.30    5.60
   3   5   1   12.50    5.20
   3   5   1   11.40    6.70
   5  -5   1   -1.00    5.50
  -5  -5  -1   -3.20    5.20
  -5  -5  -1   10.00    5.70
   5  -5   1   -0.80    5.00
   5   5   1    0.20    6.00
  -5   5  -1   12.60    5.80
   5   5   1   10.00    5.80
   5   5   1    5.80    5.40
   5   5   1    1.90    5.00
   7  -5   1    6.50    6.20
  -7  -5  -1   16.80    6.70
   7  -5   1    5.70    5.30
  -7  -5  -1    8.70    5.50
   7   5   1    6.90    7.30
   7   5   1   13.40    6.10
  -7   5  -1    7.40    6.20
   7   5   1   -2.90    5.00
   9  -5   1   21.60    5.80
  -9  -5  -1   20.10    6.50
  -9  -5  -1   28.60    7.40
   9  -5   1   35.00    7.90
   9   5   1   20.00    6.10
  -9   5  -1   23.90    6.60
   9   5   1   25.60    7.20
   9   5   1   23.60    6.40
 -11  -5  -1   -3.90    5.50
 -11  -5  -1   -0.10    6.20
  11  -5   1    5.20    6.30
  11  -5   1    1.60    5.10
 -11   5  -1   12.40    7.50
  11   5   1   12.70    5.60
  11   5   1   -9.20    5.30
 -13  -5  -1   40.20    8.20
  13  -5   1   28.30    7.40
 -13  -5  -1   44.10    8.00
  13  -5   1   36.60    7.10
  13   5   1   31.80    8.60
 -13   5  -1   40.70    8.00
  15  -5   1    3.40    6.40
 -15  -5  -1   -1.60    5.80
 -15  -5  -1   14.70    7.80
 -15   5  -1    1.20    6.50
  15   5   1   -0.60    6.90
 -17  -5  -1    0.70    7.00
 -17  -5  -1    3.80    6.70
  17  -5   1    8.50    6.50
 -17   5  -1   -0.60    6.90
  17   5   1    3.00    7.60
 -19  -5  -1    3.70    7.30
 -19   5  -1   18.50    7.10
  19   5   1  -12.00    9.10
   8  -6  -1    5.00    5.40
  -8  -6   1   -7.30    7.90
  -8  -6   1    6.50    6.50
   8  -6  -1   10.20    7.10
  -8   6   1   -2.40    6.90
   8   6  -1   -9.30    6.70
  -6  -6   1   10.90    7.70
  -6  -6   1    2.40    6.50
   6  -6  -1    2.50    7.60
   6  -6  -1    7.60    6.50
  -6   6   1   15.10    7.00
   6   6  -1    1.70    7.30
  -4  -6   1    5.40    7.30
  -4  -6   1   10.10    6.40
   4  -6  -1    3.60    8.60
   4  -6  -1   -4.50    6.80
   4   6  -1    0.60    7.40
  -4   6   1    5.50    6.70
  -2  -6   1   17.00    6.80
  -2  -6   1    4.80    8.00
   2  -6  -1    3.10   10.00
   2  -6  -1   14.50    7.30
   2   6  -1   19.60    7.40
  -2   6   1   10.00    6.50
   0  -6   1    5.80    5.80
   0  -6   1    3.50    7.70
   0  -6  -1    9.90    5.90
   0  -6  -1   -2.60    6.70
   0   6   1    8.20    6.90
   0   6  -1   15.90    6.70
   2  -6   1   12.90    6.10
  -2  -6  -1    9.30    9.10
  -2  -6  -1    4.50    5.90
   2  -6   1   11.60    8.30
   2   6   1   13.90    7.50
  -2   6  -1   24.70    7.30
   4  -6   1   11.90    6.40
  -4  -6  -1    3.20    7.90
   4  -6   1    1.00    6.60
  -4  -6  -1   10.30    5.80
   4   6   1    5.20    7.20
  -6  -6  -1    2.70    6.10
   6  -6   1    7.30    7.40
   6  -6   1    6.70    5.60
  -6  -6  -1    1.60    7.80
  -6   6  -1    4.50    7.20
   6   6   1    4.40    6.90
  -8  -6  -1   17.80    7.00
   8  -6   1    8.20    6.20
 -32   0   2    9.90    6.70
 -32   0   2   18.60    7.00
 -30   0   2   22.80    6.70
 -30   0   2   24.30    7.40
 -28   0   2   91.99   13.90
 -28   0   2   68.49    8.50
 -26   0   2   33.40    6.50
 -26   0   2   37.80    8.80
 -26   0   2   22.60    5.90
 -24   0   2   63.29    7.30
 -24   0   2   61.19    7.90
 -24   0   2   74.59    8.60
 -22   0   2   67.79    7.10
 -22   0   2   68.09    7.80
 -22   0   2   48.90    6.40
 -22   0   2   58.39    7.20
 -20   0   2    1.00    4.30
 -20   0   2    4.40    3.90
 -20   0   2    0.00    4.20
 -20   0   2    0.40    3.70
 -18   0   2  269.17   11.80
 -18   0   2  300.97   15.40
 -18   0   2  285.97   11.80
  16   0  -2   48.50    4.80
 -16   0   2   62.99    5.80
 -16   0   2   59.49    6.90
  16   0  -2   55.29    4.90
 -16   0   2   62.19    5.80
 -16   0   2   53.49    5.90
 -16   0   2   52.69    5.50
 -14   0   2    6.00    3.20
 -14   0   2    6.80    2.90
 -14   0   2    0.90    2.90
  14   0  -2    5.50    2.40
 -14   0   2    7.80    3.20
  14   0  -2   12.70    3.00
 -14   0   2    8.70    3.10
 -12   0   2  111.89    6.30
 -12   0   2  112.79    6.10
  12   0  -2  119.69    5.80
  12   0  -2  117.29    5.70
 -10   0   2 1421.46   39.10
 -10   0   2 1406.96   38.80
  10   0  -2 1418.16   38.90
  10   0  -2 1415.86   38.70
  -8   0   2 3222.48   88.09
   8   0  -2 3512.75   88.39
  -8   0   2 3258.57   87.89
  -6   0   2   17.20    2.60
   6   0  -2   16.00    2.40
  -6   0   2   21.90    2.90
   6   0  -2   17.70    2.60
  -2   0   2    6.10    1.60
  -2   0   2    7.10    1.60
   2   0  -2    5.20    1.30
   2   0  -2    4.80    1.40
   0   0   2  917.51   24.90
   0   0  -2  913.71   24.90
   0   0  -2  911.21   24.90
   0   0   2  934.21   25.00
   0   0   2  913.81   24.70
   0   0  -2 1013.50   24.70
   2   0   2   53.89    3.50
  -2   0  -2   58.99    3.00
  -2   0  -2   64.49    3.20
  -2   0  -2   57.79    3.10
  -2   0  -2   62.89    3.10
   2   0   2   60.69    3.00
   2   0   2   63.19    3.20
   2   0   2   62.69    3.00
  -2   0  -2   61.29    3.10
   2   0   2   56.89    2.80
   4   0   2  995.70   27.50
  -4   0  -2  986.70   27.40
   4   0   2 1008.10   27.40
  -4   0  -2 1038.70   27.60
   4   0   2  992.40   27.30
   4   0   2 1003.90   27.60
   4   0   2  986.00   27.30
  -4   0  -2  998.00   27.30
  -4   0  -2 1040.00   27.40
  -4   0  -2 1057.49   27.60
  -6   0  -2 3630.04   95.69
  -6   0  -2 3590.54   95.29
   6   0   2 3637.14   95.49
  -6   0  -2 3670.83   95.39
  -6   0  -2 3577.44   95.49
  -6   0  -2 3637.84   95.59
  -8   0  -2  227.48    8.20
   8   0   2  232.98    8.40
   8   0   2  231.38    8.20
   8   0   2  217.78    7.80
  -8   0  -2  232.58    8.60
  -8   0  -2  228.38    8.40
   8   0   2  222.88    8.00
  -8   0  -2  224.48    8.10
  -8   0  -2  228.88    8.30
 -10   0  -2 3683.33   99.19
 -10   0  -2 3799.92   99.69
  10   0   2 3732.03   99.09
 -10   0  -2 3722.63   99.29
  10   0   2 3699.83   99.19
  10   0   2 3769.22   99.49
 -10   0  -2 3798.62   99.79
 -10   0  -2 3746.93   99.49
 -12   0  -2  503.55   16.20
  12   0   2  483.25   15.60
 -12   0  -2  600.04   20.50
 -12   0  -2  497.75   16.40
 -12   0  -2  495.35   16.00
 -12   0  -2  494.65   16.30
  12   0   2  468.75   15.40
 -14   0  -2    3.10    3.00
 -14   0  -2    1.40    3.00
 -14   0  -2    0.80    3.00
 -14   0  -2    6.70    4.40
  14   0   2    2.90    2.40
  14   0   2   -0.30    2.20
 -14   0  -2   -0.80    2.90
 -16   0  -2  325.87   13.00
 -16   0  -2  317.77   12.40
 -16   0  -2  331.67   12.40
 -16   0  -2  320.37   12.80
 -18   0  -2  573.44   20.10
 -18   0  -2  590.44   22.40
 -18   0  -2  572.24   19.60
 -20   0  -2   56.59    6.30
 -20   0  -2   50.39    6.40
 -20   0  -2   49.50    6.70
 -20   0  -2   58.69    6.60
 -22   0  -2   43.90    6.40
 -22   0  -2   46.40    6.70
 -22   0  -2   46.10    7.10
 -22   0  -2   48.10    6.60
 -24   0  -2   46.50    7.60
 -24   0  -2   38.80    7.10
 -24   0  -2   60.89    9.20
 -26   0  -2   56.19    8.60
 -26   0  -2   38.90    7.30
 -28   0  -2  456.45   20.00
 -28   0  -2  438.06   19.30
 -30   0  -2   70.19    8.90
 -30   0  -2   55.59    8.60
 -32   0  -2  101.89   12.00
 -32   0  -2  105.29   11.10
 -33  -1   2    8.70    6.90
 -33   1   2   -2.80    6.30
 -33   1   2   -1.30    6.00
 -31  -1   2   41.40    8.50
 -31  -1   2   34.00    8.20
 -31   1   2   27.90    7.30
 -31   1   2   44.50    7.30
 -29  -1   2   95.29   10.90
 -29  -1   2   72.99    9.60
 -29   1   2   74.59    9.20
 -29   1   2   75.29    9.00
 -27  -1   2   18.10    6.70
 -27  -1   2   26.40   10.10
 -27   1   2   20.10    6.60
 -27   1   2   28.30    6.60
 -27   1   2   17.60    6.20
 -25  -1   2   60.39    8.50
 -25  -1   2   49.90    7.20
 -25   1   2   71.19   12.50
 -25   1   2   49.70    7.40
 -25   1   2   54.89    7.40
 -25   1   2   66.69    7.70
 -23  -1   2  136.79    9.70
 -23  -1   2   99.99    9.30
 -23   1   2  124.39    9.00
 -23   1   2  155.78   16.60
 -23   1   2  124.49    9.30
 -23   1   2  107.49    8.60
 -21  -1   2   57.39    6.90
 -21  -1   2   40.20    6.40
 -21  -1   2   46.30    6.10
 -21   1   2   44.40    6.10
 -21   1   2   43.10    6.10
 -21   1   2   42.60    6.10
 -21   1   2   44.90    5.90
 -19  -1   2  122.79   11.40
 -19  -1   2  125.29    8.50
 -19  -1   2  119.69    8.50
 -19  -1   2  113.69    8.20
 -19   1   2  129.59    7.90
 -19   1   2  131.49    7.80
 -19   1   2  124.29    7.90
 -19   1   2  122.99    8.20
 -17  -1   2   95.19    7.50
 -17  -1   2   85.39    5.10
 -17  -1   2  100.59    7.60
 -17  -1   2   89.39    7.20
 -17  -1   2   91.89    8.80
 -17  -1   2   82.39    7.60
  17  -1  -2   99.89    5.70
  17   1  -2   87.29    7.00
  17   1  -2   89.09    6.70
 -17   1   2   92.79    7.00
 -17   1   2   88.69    6.50
  15  -1  -2  693.03   21.20
 -15  -1   2  704.63   22.20
 -15  -1   2  659.73   20.10
 -15  -1   2  683.73   22.40
  15  -1  -2  729.33   20.90
 -15  -1   2  697.33   22.10
 -15  -1   2  692.33   25.50
 -15   1   2  716.93   20.50
  15   1  -2  706.33   22.20
  15   1  -2  726.53   24.80
 -15   1   2  765.32   21.60
 -15   1   2  732.63   21.80
 -13  -1   2  112.99    7.00
  13  -1  -2   82.99    4.70
 -13  -1   2  110.49    4.90
 -13  -1   2  118.19    6.50
  13  -1  -2   86.99    4.80
 -13  -1   2   92.99    6.20
 -13  -1   2   94.99    6.20
 -13  -1   2  105.99    6.40
  13   1  -2   87.99    5.90
 -13   1   2   81.89    4.40
  13   1  -2  106.99    5.90
 -13   1   2   71.49    5.30
 -13   1   2   90.79    5.50
  11  -1  -2  220.98    7.80
 -11  -1   2  219.08    9.00
  11  -1  -2  221.78    7.10
 -11  -1   2  220.88    7.70
 -11  -1   2  222.18    8.80
 -11  -1   2  219.18    8.80
  11  -1  -2  219.28    7.70
 -11  -1   2  214.68    9.00
 -11  -1   2  218.58    8.80
  11   1  -2  214.18    8.80
 -11   1   2  223.58    8.10
 -11   1   2  225.18    8.40
  11   1  -2  231.48    8.80
  -9  -1   2   44.00    4.40
  -9  -1   2   49.80    4.40
   9  -1  -2   39.40    3.10
   9  -1  -2   43.00    3.20
  -9  -1   2   38.70    3.50
  -9  -1   2   38.00    4.30
   9  -1  -2   36.80    2.90
  -9  -1   2   43.00    4.20
  -9  -1   2   47.00    4.20
   9   1  -2   42.20    4.10
   9   1  -2   38.40    4.10
  -9   1   2   35.90    3.70
   9   1  -2   50.79    4.80
  -9   1   2   37.90    3.70
  -9   1   2   40.50    2.80
  -7  -1   2   81.59    5.10
  -7  -1   2   82.79    4.50
  -7  -1   2   96.99    4.80
  -7  -1   2   84.79    5.00
  -7  -1   2   89.79    5.10
   7  -1  -2   81.79    4.10
   7  -1  -2   88.59    3.90
  -7  -1   2   86.79    5.00
  -7   1   2   81.99    4.20
   7   1  -2  111.79    5.30
  -7   1   2   86.49    4.40
  -7   1   2   81.49    3.50
   7   1  -2   99.59    4.90
   7   1  -2   90.19    4.90
  -5  -1   2   48.10    3.90
  -5  -1   2   51.59    3.80
   5  -1  -2   52.89    2.70
   5  -1  -2   54.99    3.00
  -5  -1   2   58.59    4.50
  -5  -1   2   53.49    3.60
   5  -1  -2   58.99    3.10
  -5  -1   2   52.49    3.90
   5  -1  -2   42.90    3.60
  -5  -1   2   57.59    3.80
   5  -1  -2   54.59    3.10
   5   1  -2   49.10    3.80
   5   1  -2   56.09    3.90
   5   1  -2   55.19    3.80
  -5   1   2   52.79    3.40
  -5   1   2   53.49    3.40
   5   1  -2   53.89    3.90
  -3  -1   2 4945.51  126.39
  -3  -1   2 4826.22  126.29
  -3  -1   2 4911.21  126.79
   3  -1  -2 4635.14  126.19
   3  -1  -2 4932.91  125.99
  -3  -1   2 4794.52  126.39
   3  -1  -2 4801.32  126.29
  -3  -1   2 4859.11  126.59
   3  -1  -2 4879.71  126.19
  -3  -1   2 4960.20  126.59
   3   1  -2 4779.22  126.29
   3   1  -2 4501.65  126.59
  -3   1   2 4921.91  126.39
  -3   1   2 5021.50  126.49
  -3   1   2 4943.51  126.99
   3   1  -2 4794.52  126.39
   3   1  -2 4746.33  126.49
  -1  -1   2 9999.00  253.57
   1   1  -2 9542.75  253.87
   1   1  -2 9747.02  254.27
  -1  -1  -2 2333.37   61.39
   1  -1   2 2254.37   61.59
   1  -1   2 2266.07   61.29
  -1  -1  -2 2392.96   61.79
  -1  -1  -2 2358.56   61.49
  -1  -1  -2 2342.57   61.59
   1   1   2 2324.37   61.39
   1   1   2 2382.46   61.69
   1   1   2 2382.86   61.79
   1   1   2 2328.37   61.49
  -1   1  -2 2249.57   61.59
   1   1   2 2336.57   61.49
  -1   1  -2 2215.78   61.19
   3  -1   2 1381.76   38.20
  -3  -1  -2 1429.06   38.10
  -3  -1  -2 1381.76   39.00
   3  -1   2 1375.06   37.80
  -3  -1  -2 1407.26   38.10
  -3  -1  -2 1428.56   38.40
  -3  -1  -2 1425.86   38.40
   3   1   2 1404.96   38.20
   3   1   2 1421.26   38.40
   3   1   2 1428.96   38.40
   3   1   2 1422.46   38.10
  -3   1  -2 1371.56   38.10
   3   1   2 1420.76   38.20
   5  -1   2  129.39    5.90
   5  -1   2  121.59    5.70
  -5  -1  -2  124.29    6.10
  -5  -1  -2  135.39    6.00
  -5  -1  -2  139.09    6.20
  -5  -1  -2  134.49    6.00
  -5  -1  -2  136.69    6.20
  -5   1  -2  127.79    5.60
   5   1   2  123.59    6.00
   5   1   2  137.59    6.00
   5   1   2  132.89    5.80
  -5   1  -2  138.99    5.40
   5   1   2  139.19    6.40
  -5   1  -2  128.79    4.30
   5   1   2  131.69    6.30
  -7  -1  -2    2.00    2.40
  -7  -1  -2    4.70    2.70
   7  -1   2    4.80    2.50
  -7  -1  -2    3.40    2.50
  -7  -1  -2    5.00    2.80
  -7  -1  -2    7.60    2.70
   7   1   2    3.40    2.40
   7   1   2    1.70    3.10
   7   1   2    6.70    2.70
  -7   1  -2    3.40    1.80
  -7   1  -2    4.00    1.90
   7   1   2    4.90    2.90
  -7   1  -2    3.50    1.70
  -7   1  -2    5.30    2.30
   7   1   2    7.70    2.90
  -7   1  -2    4.90    2.10
  -7   1  -2    7.20    1.90
   9  -1   2  124.89    4.50
  -9  -1  -2  126.79    6.40
  -9  -1  -2  132.59    7.40
  -9  -1  -2  125.49    6.50
   9  -1   2  124.99    4.50
  -9  -1  -2  126.19    6.60
  -9  -1  -2  123.09    6.60
   9   1   2  122.89    6.20
   9   1   2  126.49    6.40
   9   1   2  127.09    7.00
   9   1   2  132.29    6.90
  -9   1  -2  133.89    5.70
  -9   1  -2  128.89    5.30
  -9   1  -2  121.49    5.20
  -9   1  -2  129.19    5.50
  -9   1  -2  133.29    5.70
  -9   1  -2  128.69    5.40
   9   1   2  126.49    6.60
 -11  -1  -2  332.77   12.30
  11  -1   2  324.67    9.90
 -11  -1  -2  329.67   11.90
 -11  -1  -2  324.67   12.00
 -11  -1  -2  326.77   11.90
 -11  -1  -2  316.57   12.00
  11  -1   2  320.47    9.90
  11   1   2  326.17   12.30
 -11   1  -2  320.17   10.80
 -11   1  -2  327.37   10.70
  11   1   2  314.47   15.40
 -11   1  -2  323.77   11.00
 -11   1  -2  330.17   10.70
 -11   1  -2  317.87   10.70
  11   1   2  324.67   11.60
  11   1   2  335.67   12.10
  11   1   2  333.57   12.30
 -13  -1  -2  226.68    9.70
 -13  -1  -2  217.88    9.50
 -13  -1  -2  208.48    9.70
  13  -1   2  225.68    7.70
 -13  -1  -2  222.28    9.90
 -13  -1  -2  228.28    9.90
  13  -1   2  225.38    7.70
  13   1   2  219.08   10.40
  13   1   2  212.08    9.80
  13   1   2  212.68    9.40
  13   1   2  228.58   10.20
 -13   1  -2  218.08    8.50
 -13   1  -2  226.78    8.80
 -13   1  -2  217.08    8.60
 -13   1  -2  219.28    8.40
 -13   1  -2  221.68    8.90
  15  -1   2   36.70    3.40
  15  -1   2   32.20    3.50
 -15  -1  -2   34.60    5.30
 -15  -1  -2   33.30    4.70
 -15  -1  -2   33.20    5.90
  15   1   2   31.80    5.80
 -15   1  -2   31.80    4.50
 -15   1  -2   36.80    4.50
  15   1   2   43.00    5.00
 -15   1  -2   41.50    5.00
 -15   1  -2   45.80    7.80
 -15   1  -2   37.70    4.70
 -17  -1  -2   19.20    4.70
 -17  -1  -2   22.70    4.90
 -17  -1  -2   12.50    4.60
 -17  -1  -2   16.80    4.20
 -17   1  -2   12.70    3.80
 -17   1  -2   19.00    4.50
 -17   1  -2   23.70    4.60
 -17   1  -2   20.40    4.30
 -19  -1  -2   74.49    7.90
 -19  -1  -2   83.59    8.20
 -19  -1  -2   66.39    7.30
 -19   1  -2   73.59    6.90
 -19   1  -2   69.89    6.70
 -19   1  -2   80.89    6.80
 -19   1  -2   67.49    7.40
 -21  -1  -2   26.90    6.10
 -21  -1  -2   20.20    5.70
 -21  -1  -2   29.80    6.70
 -21   1  -2   29.90    5.20
 -21   1  -2   33.60    5.50
 -21   1  -2   28.20    5.90
 -21   1  -2   22.50    5.50
 -23  -1  -2   40.10    7.40
 -23  -1  -2   51.89    7.70
 -23   1  -2   37.20    6.00
 -23   1  -2   46.80    7.00
 -23   1  -2   36.20    7.40
 -23   1  -2   42.90    6.10
 -25  -1  -2  119.39   10.50
 -25   1  -2  123.09   16.10
 -25   1  -2  115.69   12.40
 -25   1  -2  127.79   10.40
 -25   1  -2  102.09    9.60
 -27  -1  -2   10.80    6.10
 -27  -1  -2   15.20    6.40
 -27   1  -2    8.30    5.30
 -27   1  -2   16.40    6.40
 -29  -1  -2   91.89   10.30
 -29  -1  -2   82.69    9.90
 -29   1  -2   83.09    9.20
 -29   1  -2   71.19    9.50
 -31  -1  -2   24.30    7.70
 -31   1  -2   16.80    8.60
 -32  -2   2   18.30    6.60
 -32  -2   2   14.10    7.60
 -32   2   2   27.10    6.60
 -32   2   2   27.40    7.80
 -30  -2   2   21.00    6.80
 -30  -2   2   13.90    7.40
 -30   2   2   28.70    6.60
 -30   2   2   22.70    6.90
 -28  -2   2   60.39    8.90
 -28  -2   2   42.00    8.00
 -28   2   2   56.49    8.20
 -28   2   2   90.49    9.10
 -26  -2   2    4.10    5.60
 -26  -2   2    9.50    5.20
 -26   2   2   -6.30    4.40
 -26   2   2   -2.80    5.00
 -26   2   2   10.30    5.60
 -24  -2   2    7.70    3.50
 -24  -2   2    2.60    5.00
 -24  -2   2    2.20    5.00
 -24   2   2   12.90    4.90
 -24   2   2    7.30    5.30
 -24   2   2   -3.30    4.60
 -24   2   2    9.90    4.40
 -22  -2   2  129.79    9.60
 -22  -2   2  145.09   10.20
 -22  -2   2  115.49    7.40
 -22   2   2  110.79    8.60
 -22   2   2  115.29    8.70
 -22   2   2  118.69    8.10
 -22   2   2  120.69    8.60
 -20  -2   2  147.89    9.90
 -20  -2   2  145.59    7.80
 -20  -2   2  136.99   11.10
 -20   2   2  136.49    8.30
 -20   2   2  135.69    8.50
 -18  -2   2  611.74   20.70
 -18  -2   2  583.24   18.80
 -18  -2   2  582.24   21.00
 -18   2   2  574.14   19.40
 -18   2   2  602.14   19.10
  18   2  -2  578.44   20.70
 -16  -2   2  152.68    8.80
  16  -2  -2  132.39    7.20
 -16  -2   2  133.89    8.60
 -16  -2   2  125.09    7.30
 -16   2   2  145.79    7.70
  16   2  -2  138.79    8.60
 -16   2   2  147.39    7.30
  16   2  -2  142.29    8.40
 -14  -2   2  419.66   15.20
  14  -2  -2  390.26   13.90
 -14  -2   2  404.56   14.70
 -14  -2   2  414.66   14.00
 -14  -2   2  417.56   14.80
 -14  -2   2  410.86   15.00
  14   2  -2  406.46   14.70
 -14   2   2  389.26   12.70
 -14   2   2  399.16   13.60
  14   2  -2  428.36   15.50
 -14   2   2  403.96   13.20
  14   2  -2  373.86   16.70
 -12  -2   2    9.70    3.20
 -12  -2   2   -4.40    3.10
 -12  -2   2    0.60    2.90
 -12  -2   2   -0.90    3.20
 -12  -2   2    3.80    3.50
 -12  -2   2   -1.10    2.70
  12  -2  -2    6.80    3.10
  12   2  -2    1.90    3.50
  12   2  -2    3.20    3.30
 -10  -2   2  294.57   10.90
  10  -2  -2  290.27    9.70
  10  -2  -2  305.07   11.50
 -10  -2   2  292.97   11.00
 -10  -2   2  299.57   11.30
 -10  -2   2  295.17   11.20
 -10  -2   2  287.97   11.00
 -10  -2   2  292.67   10.90
 -10   2   2  316.57    9.90
 -10   2   2  323.87   10.10
  10   2  -2  283.87   11.00
  10   2  -2  300.37   11.40
 -10   2   2  301.67    9.70
  10   2  -2  289.37   11.20
  -8  -2   2   93.19    5.80
  -8  -2   2   90.89    6.10
  -8  -2   2  119.99    5.90
  -8  -2   2   99.09    5.50
  -8  -2   2   94.09    5.70
  -8  -2   2   96.29    5.50
   8   2  -2   93.89    5.90
   8   2  -2   99.49    6.40
   8   2  -2  105.29    6.20
  -6  -2   2   16.30    2.50
  -6  -2   2   22.10    3.30
  -6  -2   2   19.50    3.00
   6  -2  -2   21.30    3.40
  -6  -2   2   18.50    3.10
   6  -2  -2   21.20    3.00
  -6  -2   2   18.70    3.60
   6   2  -2   15.40    3.30
  -6   2   2   22.20    4.20
   6   2  -2   18.40    3.60
  -6   2   2   31.50    3.10
   6   2  -2   24.50    3.40
   6   2  -2   23.70    3.20
  -6   2   2   28.50    3.20
   6   2  -2   21.40    3.40
   4  -2  -2  185.18    6.00
   4  -2  -2  178.98    6.00
   4  -2  -2  183.18    7.90
   4  -2  -2  181.88    6.00
  -4  -2   2  186.58    6.90
   4  -2  -2  189.58    7.30
  -4  -2   2  187.48    6.70
  -4  -2   2  183.68    7.20
  -4  -2   2  175.28    6.70
  -4  -2   2  194.08    8.10
  -4  -2   2  192.18    6.80
  -4  -2   2  179.68    7.60
  -4   2   2  187.48    6.50
  -4   2   2  185.18    6.70
  -4   2   2  189.38    7.00
   4   2  -2  182.48    7.30
   4   2  -2  181.88    7.00
  -4   2   2  185.48    8.10
   4   2  -2  180.38    7.50
   4   2  -2  179.88    7.20
   4   2  -2  190.58    7.40
  -4   2   2  172.48    6.50
  -2  -2   2   30.40    3.60
  -2  -2   2   23.00    2.50
  -2  -2   2   23.30    2.60
  -2  -2   2   24.70    3.70
  -2  -2   2   26.30    2.30
  -2  -2   2   23.00    2.60
   2   2  -2   29.70    2.90
   2   2  -2   26.50    2.90
   2   2  -2   30.50    3.30
   2   2  -2   33.40    3.30
   2   2  -2   22.00    3.40
   0  -2  -2 1853.21   50.89
   0  -2   2 1884.81   50.29
   0  -2  -2 1939.01   49.90
   0  -2   2 1897.31   50.99
   0  -2  -2 1844.62   49.70
   0  -2  -2 1776.92   49.80
   0  -2  -2 1822.62   50.69
   0  -2  -2 1846.92   49.70
   0   2  -2 1816.82   49.30
   0   2  -2 1826.62   49.99
   0   2   2 1867.41   49.90
   0   2  -2 1872.61   49.20
   0   2   2 1860.81   50.09
   0   2  -2 1847.72   49.20
   0   2   2 1883.01   50.09
   0   2  -2 1905.71   49.40
   0   2   2 1825.92   50.79
   0   2   2 1821.22   50.29
  -2  -2  -2    0.30    1.90
  -2  -2  -2   -5.30    2.70
  -2  -2  -2    3.40    2.00
   2  -2   2    5.00    2.50
  -2  -2  -2    2.00    2.60
  -2  -2  -2    4.60    2.20
   2  -2   2    4.50    2.80
   2   2   2    5.40    2.50
  -2   2  -2    2.00    2.40
   2   2   2   -6.30    3.00
   2   2   2    6.20    2.70
   2   2   2    1.30    2.10
   2   2   2    0.90    2.50
  -2   2  -2    5.40    2.10
  -4  -2  -2  688.33   21.30
  -4  -2  -2  647.94   19.70
  -4  -2  -2  669.03   19.60
   4  -2   2  664.83   20.20
   4  -2   2  672.03   19.50
  -4   2  -2  665.93   19.50
   4   2   2  643.14   19.60
   4   2   2  652.83   20.20
   4   2   2  642.24   20.30
  -4   2  -2  643.94   19.30
   4   2   2  672.53   19.90
   4   2   2  656.13   19.90
  -6  -2  -2  100.49    5.80
   6  -2   2   88.99    5.80
  -6  -2  -2   95.19    5.70
  -6  -2  -2   94.79    5.70
   6  -2   2   89.59    5.20
  -6  -2  -2   91.19    5.60
  -6  -2  -2   82.39    5.40
   6   2   2   97.79    5.60
   6   2   2   92.49    5.90
   6   2   2   90.59    5.70
   6   2   2   92.69    6.30
  -6   2  -2   86.89    5.20
   6   2   2   90.09    6.30
   8  -2   2   17.10    3.40
  -8  -2  -2   16.80    3.50
  -8  -2  -2   16.30    3.40
   8  -2   2   20.10    3.90
  -8  -2  -2   25.10    4.20
  -8  -2  -2   18.50    3.80
  -8  -2  -2   15.90    3.30
   8   2   2   14.20    3.50
   8   2   2   13.20    3.60
   8   2   2   10.00    3.60
   8   2   2   23.20    3.90
   8   2   2   14.20    3.80
 -10  -2  -2   38.80    4.70
 -10  -2  -2   32.70    4.60
 -10  -2  -2   36.00    4.80
 -10  -2  -2   39.60    5.10
 -10  -2  -2   39.40    4.70
  10  -2   2   40.90    4.80
  10   2   2   37.50    4.70
  10   2   2   44.70    5.80
 -10   2  -2   28.30    3.10
  10   2   2   38.80    4.90
 -10   2  -2   35.80    3.10
  10   2   2   38.60    5.30
  10   2   2   32.80    5.00
  12  -2   2   -0.60    3.00
 -12  -2  -2   13.20    3.90
 -12  -2  -2   10.50    4.00
 -12  -2  -2   11.90    4.10
 -12  -2  -2   14.00    3.80
  12   2   2    8.50    4.20
  12   2   2   18.00    4.20
  12   2   2    4.10    4.30
  12   2   2   13.10    4.60
 -14  -2  -2    7.90    3.80
 -14  -2  -2   -1.20    3.80
 -14  -2  -2    0.60    4.20
 -14   2  -2    3.00    2.50
 -14   2  -2    1.50    3.10
  14   2   2   -0.60    3.80
  14   2   2    1.60    4.30
 -14   2  -2    0.70    2.50
  14   2   2   -3.70    4.00
 -14   2  -2    2.20    2.80
  14   2   2    1.90    4.60
 -16  -2  -2   22.00    5.30
 -16  -2  -2   11.30    4.70
  16   2   2   15.60    5.00
 -16   2  -2   15.30    3.60
 -16   2  -2   15.10    3.40
  16   2   2   25.70    5.80
 -16   2  -2   17.40    3.90
  16   2   2   18.40    5.60
 -16   2  -2   14.40    3.70
 -18  -2  -2   78.39    8.20
 -18  -2  -2   79.79    8.30
 -18   2  -2   73.39    6.30
  18   2   2   69.39    8.60
 -18   2  -2   69.29    6.10
 -18   2  -2   63.89    6.10
 -18   2  -2   72.99    6.00
 -20  -2  -2   10.50    5.10
 -20  -2  -2   17.50    5.60
 -20   2  -2   13.90    4.50
 -20   2  -2   14.10    4.50
 -20   2  -2   16.20    4.10
 -20   2  -2   13.30    4.40
 -22  -2  -2    2.20    5.30
 -22  -2  -2   -0.40    5.00
 -22   2  -2    3.60    4.20
 -22   2  -2    2.80    4.40
 -22   2  -2    9.20    4.30
 -22   2  -2    4.80    4.20
 -24  -2  -2    7.80    5.90
 -24  -2  -2    9.40    5.70
 -24   2  -2   12.90    5.50
 -24   2  -2    1.90    5.00
 -26  -2  -2   16.30    8.50
 -26  -2  -2   19.00    7.20
 -26  -2  -2   32.70    6.00
 -26   2  -2   31.60    6.20
 -26   2  -2   26.90    6.30
 -28  -2  -2    4.90    4.90
 -28  -2  -2   -4.90    5.90
 -28  -2  -2    1.00    5.40
 -28   2  -2    5.10    5.30
 -28   2  -2    4.20    5.50
 -30  -2  -2    6.40    7.30
 -30  -2  -2   25.30    8.20
 -30   2  -2    9.80    6.00
 -30   2  -2   35.90   11.30
 -29  -3   2   51.09    9.40
 -29  -3   2   62.99    9.00
 -29   3   2   80.49    8.20
 -27  -3   2    3.50    6.60
 -27  -3   2   12.00    6.60
 -27  -3   2   -0.90    4.70
 -27   3   2    7.20    5.10
 -27   3   2    4.70    5.20
 -25  -3   2   40.20    7.30
 -25  -3   2   46.40    6.40
 -25  -3   2   39.60    7.20
 -25   3   2   49.50    6.30
 -25   3   2   51.39    6.30
 -25   3   2   51.59    6.80
 -23  -3   2   12.20    4.80
 -23  -3   2   10.60    5.60
 -23  -3   2   10.60    5.40
 -23   3   2   12.80    4.40
 -23   3   2   32.60    4.90
 -23   3   2    8.10    4.50
 -23   3   2   15.70    5.00
 -21  -3   2   12.90    5.20
 -21  -3   2   11.10    4.80
 -21  -3   2   16.20    5.50
 -21   3   2   16.00    4.60
 -21   3   2   15.90    4.50
 -21   3   2   16.40    4.90
 -21   3   2    9.40    4.20
 -19  -3   2    3.50    4.60
 -19  -3   2    7.10    4.50
 -19  -3   2    1.20    4.60
  19  -3  -2   -0.70    3.40
 -19   3   2    5.10    3.90
 -19   3   2    1.10    3.60
 -17  -3   2   48.80    6.50
 -17  -3   2   43.50    6.70
  17  -3  -2   52.39    6.00
 -17  -3   2   49.90    6.40
  17   3  -2   28.00    5.90
  17   3  -2   46.70    7.40
 -17   3   2   48.40    5.20
 -17   3   2   40.00    5.10
  15  -3  -2    1.50    3.90
 -15  -3   2    2.30    4.40
 -15  -3   2    8.70    4.30
 -15  -3   2    5.60    3.90
  15   3  -2   14.10    4.10
  15   3  -2    7.10    4.60
  15   3  -2   12.70    4.70
 -15   3   2    1.60    3.20
 -15   3   2    0.70    3.10
 -13  -3   2   20.30    4.10
 -13  -3   2   16.00    4.50
  13  -3  -2   19.30    4.60
 -13  -3   2   13.20    4.70
  13   3  -2   24.40    5.50
 -13   3   2   11.60    3.40
  13   3  -2   21.70    4.70
 -13   3   2   13.70    3.30
  13   3  -2   18.80    4.40
  11  -3  -2   24.30    4.00
 -11  -3   2   17.60    4.40
 -11  -3   2   24.70    5.10
 -11  -3   2   34.50    6.90
 -11  -3   2   24.30    4.30
  11  -3  -2   19.90    4.40
  11   3  -2   29.90    5.60
 -11   3   2   22.40    3.50
 -11   3   2   26.90    5.70
  11   3  -2   24.40    5.90
   9  -3  -2  175.48    9.20
   9  -3  -2  183.28    8.00
  -9  -3   2  171.48    9.30
  -9  -3   2  182.38    8.70
  -9  -3   2  186.78    8.40
  -9  -3   2  193.08   10.00
  -9   3   2  185.78    7.40
   9   3  -2  180.48    8.80
  -9   3   2  178.08    9.90
   9   3  -2  181.98    9.00
  -9   3   2  178.98    7.60
   9   3  -2  183.48    9.70
   9   3  -2  189.28    9.30
  -7  -3   2    0.90    3.00
   7  -3  -2    2.90    3.40
  -7  -3   2    3.10    2.70
   7  -3  -2    4.00    3.20
  -7  -3   2    0.60    3.70
  -7  -3   2   -2.40    3.20
  -7  -3   2   -3.30    3.50
  -7  -3   2    3.00    2.70
  -7   3   2    0.80    2.40
   7   3  -2    3.10    3.70
   7   3  -2    5.00    3.60
   7   3  -2   -1.50    3.00
  -7   3   2    0.40    2.50
   7   3  -2    4.50    3.80
   7   3  -2   -1.30    2.80
  -5  -3   2  175.18    7.40
   5  -3  -2  169.48    9.40
  -5  -3   2  174.58    8.60
   5  -3  -2  185.88    7.90
  -5  -3   2  175.38    7.20
  -5  -3   2  161.98    6.80
  -5  -3   2  168.28    7.90
  -5  -3   2  188.38    9.60
  -5   3   2  176.08    7.10
  -5   3   2  169.48    6.90
   5   3  -2  194.48    8.90
   5   3  -2  160.18    8.40
   5   3  -2  175.18    7.70
   5   3  -2  168.08    8.00
  -5   3   2  176.58    9.30
  -5   3   2  172.98    7.30
   3  -3  -2   45.20    4.70
   3  -3  -2   63.09    6.70
  -3  -3   2   40.80    5.60
  -3  -3   2   48.30    5.10
  -3  -3   2   49.99    5.30
   3   3  -2   47.00    4.40
  -3   3   2   45.90    4.30
  -3   3   2   52.09    4.20
  -3   3   2   50.79    5.80
   3   3  -2   52.89    5.50
   3   3  -2   51.79    4.90
   3   3  -2   41.80    4.70
  -3   3   2   56.39    4.80
  -1  -3   2    1.70    3.20
  -1  -3   2   -0.50    3.70
   1  -3  -2    1.30    2.00
   1  -3  -2    3.00    2.10
   1  -3  -2    5.60    2.20
   1  -3  -2   -0.10    3.50
   1  -3  -2    4.60    2.20
   1  -3  -2    6.40    3.20
   1   3  -2   -0.70    3.30
  -1   3   2    1.70    2.90
   1   3  -2    2.10    2.80
  -1   3   2   -3.90    2.40
  -1   3   2    3.10    3.90
   1   3  -2    1.60    2.80
   1   3  -2    5.20    2.40
   1   3  -2    3.40    2.50
  -1   3   2    6.00    3.00
  -1  -3  -2  226.78   10.40
  -1  -3  -2  224.88    8.70
  -1  -3  -2  240.88    8.80
   1  -3   2  221.88    9.90
   1  -3   2  244.38   11.00
  -1  -3  -2  246.98   10.40
  -1  -3  -2  238.88    9.60
  -1  -3  -2  248.18   11.30
  -1   3  -2  238.58    8.60
   1   3   2  230.78    9.20
   1   3   2  238.18    9.50
   1   3   2  243.88   10.70
   1   3   2  239.38   10.20
   1   3   2  252.87   11.40
  -1   3  -2  227.78    8.30
  -1   3  -2  232.58    9.80
  -1   3  -2  243.88    8.30
  -3  -3  -2   63.29    5.00
   3  -3   2   69.89    6.70
  -3  -3  -2   67.69    4.80
   3  -3   2   60.29    6.00
  -3  -3  -2   62.09    5.90
  -3  -3  -2   70.49    6.90
  -3  -3  -2   71.49    7.20
  -3  -3  -2   63.39    4.80
   3   3   2   71.49    5.90
   3   3   2   67.49    6.80
   3   3   2   61.09    5.30
  -3   3  -2   71.19    4.00
   3   3   2   69.39    6.20
  -3   3  -2   71.19    3.70
  -3   3  -2   60.59    5.90
   3   3   2   61.19    5.40
  -5  -3  -2   60.79    5.30
  -5  -3  -2   40.00    4.50
  -5  -3  -2   56.89    6.00
   5  -3   2   56.19    5.60
   5  -3   2   62.39    6.70
  -5  -3  -2   61.69    6.90
   5   3   2   52.29    5.90
  -5   3  -2   58.79    5.80
   5   3   2   54.09    6.00
   5   3   2   57.79    5.50
   5   3   2   57.49    5.30
   5   3   2   57.19    7.00
   7  -3   2  147.29    7.90
  -7  -3  -2  162.28    9.50
  -7  -3  -2  156.78    7.90
   7  -3   2  152.98    8.90
  -7  -3  -2  142.19    9.00
   7   3   2  156.08    9.20
   7   3   2  147.69    8.50
   7   3   2  148.29    9.20
  -7   3  -2  169.28    8.50
   7   3   2  143.79    8.70
   7   3   2  149.59    8.00
  -9  -3  -2   84.39    7.00
  -9  -3  -2   90.89    6.70
   9  -3   2   75.69    6.60
   9  -3   2   94.89    7.70
  -9  -3  -2   89.29    8.10
  -9   3  -2   85.99    7.20
   9   3   2   78.09    7.80
   9   3   2   75.59    6.80
   9   3   2   88.89    6.70
   9   3   2   72.39    7.90
   9   3   2   78.69    7.30
  11  -3   2   14.60    4.10
  11  -3   2   16.90    4.80
 -11  -3  -2   16.90    4.80
 -11  -3  -2   21.30    5.50
 -11  -3  -2   19.60    4.70
  11   3   2   20.90    4.50
  11   3   2   17.70    5.20
  11   3   2   15.10    5.20
  11   3   2   16.50    5.40
 -13  -3  -2  122.79    9.30
 -13  -3  -2  113.79    8.90
 -13  -3  -2   98.69    8.80
  13  -3   2  137.59    8.70
  13   3   2  118.79    8.80
  13   3   2  111.79    9.40
  13   3   2  106.69    9.60
  13   3   2  119.19    9.70
 -15  -3  -2    5.80    4.80
  15  -3   2    1.90    4.10
 -15  -3  -2    1.80    4.80
 -15  -3  -2   -6.10    3.70
  15   3   2   -5.50    4.40
  15   3   2    6.50    5.40
  15   3   2   -4.10    4.70
  15   3   2    1.20    5.60
 -17  -3  -2   21.50    6.30
 -17  -3  -2   33.80    6.40
 -17  -3  -2   19.70    5.50
  17   3   2   23.90    7.30
  17   3   2   17.00    5.90
 -17   3  -2   23.50    4.00
 -17   3  -2   17.80    3.50
 -19  -3  -2   13.70    6.20
 -19  -3  -2   14.70    5.10
 -19  -3  -2   13.50    6.00
 -19   3  -2   21.10    3.90
 -19   3  -2   22.10    4.40
  19   3   2   14.60    6.10
 -21  -3  -2   38.80    7.20
 -21  -3  -2   21.30    6.00
 -21  -3  -2   38.20    7.20
 -21   3  -2   28.40    4.60
 -23  -3  -2    8.80    6.70
 -23  -3  -2    5.80    6.30
 -23  -3  -2   18.90    5.70
 -23   3  -2   20.10    4.90
 -23   3  -2   19.40    3.90
 -23   3  -2    9.20    4.90
 -25  -3  -2   18.60    7.10
 -25  -3  -2   26.00    6.10
 -25  -3  -2    3.50    6.10
 -25   3  -2   18.40    5.40
 -25   3  -2   35.00    5.50
 -27  -3  -2   32.70    7.80
 -27  -3  -2   35.40    8.90
 -27  -3  -2   35.70    7.00
 -27   3  -2   49.90    5.80
 -27   3  -2   38.90    6.60
 -26  -4   2    3.50    6.20
 -26  -4   2    6.40    7.30
 -24  -4   2   -1.20    6.20
 -24  -4   2    3.00    5.30
 -24   4   2    5.70    6.80
 -24   4   2    4.50    4.90
 -24   4   2    5.70    4.10
 -22  -4   2   14.50    5.90
 -22  -4   2    1.70    6.40
 -22  -4   2    8.80    6.10
 -22   4   2   16.00    3.90
 -22   4   2   16.80    7.00
 -22   4   2   13.80    3.90
 -20  -4   2   19.70    6.80
  20  -4  -2   10.80    6.20
 -20  -4   2   13.40    5.80
 -20  -4   2   22.30    5.60
 -20   4   2   24.70    4.30
 -20   4   2   25.10    8.10
 -20   4   2   24.10    4.00
 -18  -4   2    2.70    4.60
 -18  -4   2    0.30    5.70
  18   4  -2   -2.50    6.00
  16  -4  -2    4.80    4.90
 -16  -4   2   -0.90    5.80
 -16  -4   2   -1.50    4.10
 -16  -4   2   -6.80    3.70
 -16  -4   2    3.60    5.60
 -16   4   2   -0.20    6.20
 -16   4   2    0.20    3.30
  16   4  -2   11.60    7.50
  16   4  -2   -5.90    5.60
 -14  -4   2   16.00    5.90
  14  -4  -2   19.60    5.60
 -14  -4   2   13.50    5.70
 -14  -4   2    8.40    4.00
 -14  -4   2   13.00    4.40
 -14   4   2   16.60    6.50
 -14   4   2   17.50    3.80
  14   4  -2   11.40    5.90
  12  -4  -2   10.80    4.30
  12  -4  -2   12.00    5.40
 -12  -4   2   10.90    5.10
 -12  -4   2   10.90    4.10
 -12  -4   2    6.00    5.70
 -12  -4   2    9.20    3.50
 -12   4   2   12.60    3.50
 -12   4   2   11.50    5.70
  12   4  -2   14.20    4.80
  12   4  -2    7.60    5.30
 -10  -4   2   -1.50    4.60
 -10  -4   2    5.50    3.70
  10  -4  -2    1.60    5.10
  10  -4  -2   -1.30    3.70
  10   4  -2   13.20    7.70
 -10   4   2    5.70    3.30
  10   4  -2    2.20    4.60
 -10   4   2   -0.80    5.20
  10   4  -2    5.50    4.20
  -8  -4   2   41.70    6.70
  -8  -4   2   43.30    6.10
  -8  -4   2   40.50    7.20
   8  -4  -2   45.60    7.40
   8  -4  -2   44.00    5.70
   8   4  -2   43.20    5.60
  -8   4   2   41.70    4.60
   8   4  -2   35.60    6.30
  -8   4   2   46.50    7.40
  -8   4   2   44.10    4.90
   8   4  -2   36.80    5.30
   6  -4  -2   15.40    5.90
  -6  -4   2   12.30    2.60
  -6  -4   2   14.20    5.60
   6  -4  -2   15.10    4.40
  -6  -4   2   17.20    2.80
  -6  -4   2   22.50    5.60
  -6   4   2    9.10    5.10
   6   4  -2    9.80    4.50
   6   4  -2   16.10    4.60
   6   4  -2   16.00    4.30
  -6   4   2   17.40    4.00
  -6   4   2   14.70    4.10
   6   4  -2   15.40    5.40
  -4  -4   2   18.30    5.20
   4  -4  -2   12.10    4.30
  -4  -4   2   22.10    5.80
   4  -4  -2   12.80    5.30
   4   4  -2   18.50    4.60
   4   4  -2   23.90    3.90
  -4   4   2    8.10    3.20
  -4   4   2   13.60    3.90
  -4   4   2    8.50    3.10
  -4   4   2   11.60    3.90
  -4   4   2   19.90    5.50
   4   4  -2   17.40    5.00
   4   4  -2   30.40    4.60
   2  -4  -2    7.10    4.20
  -2  -4   2   16.20    6.10
  -2  -4   2    5.40    4.90
   2  -4  -2   12.40    5.60
   2   4  -2    3.90    3.70
   2   4  -2    9.90    5.00
  -2   4   2    7.30    3.70
  -2   4   2   13.60    3.40
  -2   4   2   16.50    4.80
  -2   4   2    7.10    4.90
  -2   4   2    5.50    4.00
   2   4  -2    8.10    3.50
   2   4  -2    8.50    3.30
   0  -4  -2   14.40    5.20
   0  -4  -2    9.70    4.50
   0  -4   2    0.30    5.20
   0   4  -2    7.00    3.30
   0   4   2    5.40    4.80
   0   4   2   11.90    3.90
   0   4   2    5.50    4.20
   0   4  -2    3.80    3.60
   0   4   2    8.10    3.90
   0   4  -2    6.30    4.60
   0   4   2    7.00    3.60
   0   4  -2   11.80    3.10
  -2  -4  -2   64.99    6.80
  -2  -4  -2   53.79    8.10
   2  -4   2   64.69    8.20
  -2  -4  -2   48.00    4.50
  -2  -4  -2   52.59    4.60
   2   4   2   57.09    7.60
   2   4   2   55.09    6.10
   2   4   2   51.09    6.20
   2   4   2   60.69    6.40
  -2   4  -2   46.10    5.40
  -2   4  -2   54.49    4.80
   2   4   2   52.99    6.80
  -2   4  -2   68.19    7.20
   4  -4   2   38.90    7.50
  -4  -4  -2   24.80    7.30
  -4  -4  -2   22.80    6.00
  -4  -4  -2   22.80    3.90
   4   4   2   24.00    5.90
   4   4   2   18.40    5.30
  -4   4  -2   26.50    5.70
   4   4   2   15.10    4.30
  -4   4  -2   27.90    3.30
   4   4   2   29.10    5.70
   4   4   2   30.70    5.20
  -6  -4  -2   17.70    5.30
  -6  -4  -2   10.50    4.00
   6  -4   2   19.30    6.20
  -6  -4  -2   10.80    5.80
   6  -4   2    5.20    4.70
  -6  -4  -2   18.60    3.80
   6   4   2   16.10    5.90
  -6   4  -2   16.20    5.30
   6   4   2   27.80    5.40
   6   4   2   31.80    5.70
   6   4   2   15.40    5.60
   6   4   2   24.50    5.60
  -8  -4  -2    2.00    5.70
  -8  -4  -2    3.40    3.70
   8  -4   2    2.10    4.20
   8   4   2   -3.90    4.20
   8   4   2   13.50    4.40
   8   4   2    7.70    4.90
   8   4   2    7.60    5.40
   8   4   2    6.50    4.60
  -8   4  -2    4.90    5.00
 -10  -4  -2  180.18   10.00
 -10  -4  -2  165.08    9.50
 -10  -4  -2  163.48   11.60
  10  -4   2  172.78   10.00
  10  -4   2  163.78   14.30
  10   4   2  153.98   11.40
  10   4   2  156.38   10.90
  10   4   2  171.58   11.70
 -10   4  -2  159.48   10.40
  10   4   2  186.98   10.80
  10   4   2  189.58   10.50
 -12  -4  -2   72.89    7.80
  12  -4   2   75.19    8.80
 -12  -4  -2   76.69    7.90
  12  -4   2   72.99    7.60
 -12  -4  -2   74.39    8.70
  12   4   2   73.79    9.10
  12   4   2   75.29    9.20
  12   4   2   77.09    9.00
  12   4   2   76.39    8.70
 -12   4  -2   59.09    8.20
 -14  -4  -2  536.05   21.40
 -14  -4  -2  523.95   20.00
  14  -4   2  546.15   20.80
 -14  -4  -2  497.55   19.90
  14   4   2  495.95   21.10
 -14   4  -2  527.05   20.70
  14   4   2  566.14   25.80
  14   4   2  556.64   22.10
 -16  -4  -2   10.20    5.80
  16  -4   2    1.90    4.00
 -16  -4  -2   11.90    5.10
 -16  -4  -2   16.00    5.00
  16   4   2    6.70    7.00
 -16   4  -2   -3.20    5.80
 -18  -4  -2   16.70    6.10
 -18  -4  -2   23.70    6.70
 -18  -4  -2   20.90    6.00
 -18   4  -2   11.40    8.00
  18   4   2   16.40    6.50
 -20  -4  -2   13.80    6.40
 -20  -4  -2   23.20    6.40
 -20  -4  -2   28.40    7.20
 -20   4  -2   15.70    7.00
  20   4   2   16.90    7.10
 -22  -4  -2   11.00    6.30
 -22  -4  -2    4.50    8.00
 -22  -4  -2   -6.20   10.10
 -24  -4  -2   49.30    8.50
 -24  -4  -2   55.09    8.80
 -19  -5   2    2.30    6.40
  19  -5  -2   -3.20    6.10
 -19  -5   2    2.90    6.80
 -19   5   2    6.80    7.00
  19   5  -2   13.30    6.60
 -17  -5   2    8.50    7.10
  17  -5  -2   11.80    7.00
 -17  -5   2   18.20    7.70
  17   5  -2    5.00    6.70
 -17   5   2   16.60    7.80
  15  -5  -2   20.10    7.20
 -15  -5   2    6.50    6.70
  15   5  -2    1.30    6.30
 -15   5   2   13.30    7.50
 -13  -5   2    4.00    6.40
 -13  -5   2   10.80    7.10
  13  -5  -2    1.10    4.30
  13  -5  -2   11.10    6.00
 -13   5   2   -1.80    6.70
  13   5  -2   23.60    7.30
  11  -5  -2   17.70    6.60
 -11  -5   2   11.40    6.20
 -11  -5   2   10.00    6.50
  11  -5  -2   12.30    4.80
 -11   5   2   26.90    7.30
  11   5  -2   10.10    5.80
  -9  -5   2   -2.00    5.70
   9  -5  -2    9.80    6.10
  -9  -5   2    5.20    6.00
   9  -5  -2    2.20    4.60
  -9   5   2   -0.50    3.40
   9   5  -2    4.40    5.80
  -9   5   2   -3.70   10.80
   7  -5  -2   16.20    5.50
  -7  -5   2    6.20    7.20
  -7  -5   2    3.40    5.60
   7  -5  -2   11.40    6.60
   7   5  -2   15.30    6.20
  -7   5   2    7.20    6.10
   7   5  -2    8.40    5.00
  -5  -5   2   29.10    6.90
   5  -5  -2   27.60    5.50
  -5  -5   2   29.60    8.90
   5  -5  -2   27.70    7.50
   5   5  -2   38.70    8.20
  -5   5   2   29.60    7.40
  -5   5   2   28.30    5.60
   5   5  -2   16.00    5.20
   5   5  -2   33.70    6.80
  -5   5   2   32.00    5.30
  -3  -5   2    8.40    6.10
   3  -5  -2    4.40    6.90
  -3  -5   2    0.50    5.40
   3  -5  -2    3.60    4.60
   3   5  -2    4.20    5.70
  -3   5   2    5.00    3.90
  -3   5   2   10.50    4.90
   3   5  -2    9.00    4.00
  -3   5   2   -0.40    3.70
   3   5  -2    4.60    4.30
  -3   5   2    5.30    5.60
  -3   5   2    6.80    3.60
   1  -5  -2    1.60    6.40
  -1  -5   2    8.80    5.50
  -1  -5   2    5.20    6.10
   1  -5  -2    1.00    4.70
  -1   5   2    8.00    4.10
   1   5  -2    1.40    3.70
  -1   5   2   -4.20    4.50
   1   5  -2   12.40    4.30
  -1   5   2    8.40    5.90
   1   5  -2    3.30    5.50
  -1   5   2    7.10    4.60
  -1   5   2    8.10    3.80
  -1  -5  -2    3.30    6.00
   1  -5   2   10.00    5.80
  -1  -5  -2   -3.90    4.20
   1  -5   2    2.40    6.50
   1   5   2   13.60    4.70
  -1   5  -2    5.70    5.60
   1   5   2   -4.40    4.90
   1   5   2    4.10    5.10
  -1   5  -2    9.40    4.00
  -1   5  -2    7.90    3.40
   1   5   2    7.30    4.50
   3  -5   2   14.20    5.60
  -3  -5  -2   10.80    7.20
  -3  -5  -2    7.00    5.80
   3  -5   2    5.10    6.30
   3   5   2    8.40    5.70
   3   5   2   22.20    5.40
   3   5   2    7.00    5.30
  -3   5  -2   10.30    6.20
   3   5   2   10.70    5.90
   5  -5   2   30.40    8.60
  -5  -5  -2   31.50    7.30
   5  -5   2   31.30    6.50
  -5  -5  -2   50.49    7.10
   5   5   2   41.10    7.60
  -5   5  -2   35.20    6.90
   5   5   2   46.30    8.00
   5   5   2   38.00    6.90
  -7  -5  -2    2.80    6.60
   7  -5   2   -5.90    6.10
   7  -5   2    7.20    5.00
  -7  -5  -2   -5.70    5.50
  -7   5  -2   -6.30    4.90
   7   5   2    3.20    6.00
   7   5   2    1.60    5.30
   7   5   2    9.20    6.10
   9  -5   2    8.10    5.60
  -9  -5  -2    8.60    5.40
  -9  -5  -2   11.10    7.60
   9  -5   2   12.60    6.50
   9   5   2   -8.10    5.10
   9   5   2   14.70    6.20
  -9   5  -2    6.50    5.60
   9   5   2    4.50    6.20
 -11  -5  -2   30.60    7.10
 -11  -5  -2   21.50    7.90
  11  -5   2   19.60    5.80
  11  -5   2   43.50    9.20
  11   5   2   21.40    7.20
 -11   5  -2   33.60    7.50
  11   5   2   30.30    7.30
  11   5   2   16.40    6.70
  13  -5   2    7.90    6.50
 -13  -5  -2   23.90    8.30
 -13  -5  -2    9.90    7.00
  13   5   2   17.40    6.50
 -13   5  -2   18.40    7.00
 -15  -5  -2   38.80    8.40
 -15  -5  -2   39.80    9.60
  15  -5   2   19.10    7.40
  15   5   2   33.60    8.60
 -15   5  -2   23.60    7.30
  17  -5   2   22.30    7.40
 -17  -5  -2   19.20    8.30
 -17  -5  -2   23.40    8.10
 -17   5  -2   20.30    7.80
  17   5   2   28.10    8.60
  -8  -6   2   10.60    8.00
   8  -6  -2   12.60    7.90
  -8  -6   2    3.70    6.50
  -8   6   2   15.30    7.50
   8   6  -2   15.30    7.70
   6  -6  -2   22.80    8.20
  -6  -6   2   37.90   10.50
  -6  -6   2   26.30    7.70
   6   6  -2   13.60    7.40
  -6   6   2   14.20    7.40
  -6   6   2   23.70    5.30
  -4  -6   2   83.19   10.10
  -4  -6   2   87.79   13.50
   4  -6  -2   79.29   12.20
  -4   6   2   92.29    8.50
   4   6  -2   96.99   11.00
  -4   6   2   87.19    9.80
   2  -6  -2   53.89   10.50
  -2  -6   2   54.99    8.80
   2  -6  -2   43.80   11.60
  -2  -6   2   50.39   10.40
  -2   6   2   48.60    6.40
   2   6  -2   42.60    8.30
  -2   6   2   68.09    8.80
  -2   6   2   41.20    7.80
   0  -6   2   15.40    9.20
   0  -6  -2    6.90    5.90
   0  -6  -2    7.80    7.20
   0  -6   2    9.30    6.60
   0   6  -2   13.60    7.20
   0   6   2   14.40    6.70
   0   6   2   19.70    5.50
  -2  -6  -2    9.40    9.00
  -2  -6  -2   12.90    6.00
   2  -6   2   -5.20    6.60
   2  -6   2   -0.20    5.40
   2   6   2   12.30    7.10
  -2   6  -2   10.60    7.10
   4  -6   2    5.90    6.20
   4  -6   2   16.30    8.50
  -4  -6  -2   -9.10    4.90
  -4  -6  -2   17.20    9.30
   4   6   2    1.40    7.10
   4   6   2    8.60    5.90
  -4   6  -2   -4.20    6.30
   6  -6   2    0.80    6.00
  -6  -6  -2    3.20    5.70
  -6  -6  -2    1.40    8.20
   6  -6   2    0.30    6.70
   6   6   2   -2.80    6.20
  -6   6  -2    4.50    6.80
   6   6   2    6.10    7.30
 -34   0   3   -2.90    5.90
 -32   0   3    4.00    6.20
 -32   0   3   12.60    6.50
 -30   0   3    1.60    5.50
 -30   0   3    4.60    6.10
 -28   0   3   -3.60    4.80
 -26   0   3    4.40    5.00
 -26   0   3   -5.40    4.90
 -24   0   3   -1.60    4.80
 -24   0   3    1.30    4.40
 -24   0   3   -1.80    4.40
 -22   0   3   -4.00    4.20
 -22   0   3   -4.40    4.00
 -22   0   3   -9.60    3.60
 -22   0   3   -6.20    4.00
 -20   0   3   -2.90    3.70
 -20   0   3   -7.50    3.30
 -20   0   3   -3.00    3.90
 -20   0   3    0.40    3.70
 -18   0   3  -10.20    5.10
 -18   0   3  -11.00    3.60
  16   0  -3  -11.40    3.80
  16   0  -3   -4.80    2.70
 -16   0   3   -3.40    2.80
 -16   0   3   -5.60    3.30
 -16   0   3   -1.30    3.00
  14   0  -3    3.40    2.50
  14   0  -3   -1.80    2.10
 -14   0   3    1.80    2.90
 -14   0   3   -1.10    2.60
  12   0  -3   -1.80    1.90
 -12   0   3    0.80    2.70
 -12   0   3   -1.50    2.50
  12   0  -3   -2.50    2.20
 -10   0   3    1.00    2.50
 -10   0   3    0.90    2.40
  10   0  -3    0.90    2.30
  10   0  -3   -1.80    2.00
  -8   0   3   -2.00    2.30
  -8   0   3   -2.30    2.20
   8   0  -3    1.40    2.10
   8   0  -3    0.00    2.60
  -6   0   3    1.90    2.30
   6   0  -3   -0.40    1.90
   6   0  -3   -0.40    2.00
  -6   0   3   -0.40    2.20
   4   0  -3    4.50    1.90
   4   0  -3   -0.80    1.90
  -4   0   3    5.60    2.20
  -4   0   3   -0.10    2.00
   2   0  -3    0.10    1.70
   2   0  -3    0.50    1.70
  -2   0   3    0.60    1.30
  -2   0   3    0.20    1.90
   2   0  -3   -0.50    1.20
   0   0   3    2.70    1.70
   0   0   3    3.60    1.80
   0   0  -3    5.70    1.90
   0   0  -3    6.90    1.90
   0   0  -3    3.30    1.80
   0   0   3    4.30    2.00
   0   0  -3    5.20    1.80
   0   0  -3    3.90    1.50
  -2   0  -3    1.90    1.90
   2   0   3   -2.10    1.70
   2   0   3    1.70    1.90
  -2   0  -3    0.00    1.80
   2   0   3    1.60    1.90
   2   0   3    0.50    1.70
   2   0   3    0.90    1.90
  -2   0  -3    1.80    1.80
  -2   0  -3    2.50    2.00
  -2   0  -3    2.30    2.00
  -4   0  -3    1.30    2.10
  -4   0  -3    2.80    2.20
   4   0   3   -1.60    2.30
  -4   0  -3   -1.40    1.90
   4   0   3   -0.10    1.80
  -4   0  -3    0.80    1.90
  -4   0  -3   -3.90    1.90
   4   0   3    0.50    2.00
   4   0   3   -1.50    1.70
   4   0   3   -0.40    1.90
   6   0   3    0.00    1.90
  -6   0  -3    0.30    2.20
   6   0   3    2.40    2.30
   6   0   3    0.30    1.90
   6   0   3   -0.50    2.00
  -6   0  -3   -2.40    2.10
  -6   0  -3   -1.40    2.00
   6   0   3    2.40    2.80
  -6   0  -3    1.40    2.10
   8   0   3    0.50    2.00
  -8   0  -3   -0.30    2.60
  -8   0  -3    0.90    2.30
  -8   0  -3   -2.00    2.00
   8   0   3   -2.90    2.10
  -8   0  -3   -0.20    2.20
  -8   0  -3    1.00    2.40
   8   0   3    0.90    2.10
   8   0   3   -1.90    1.90
  10   0   3    2.30    2.90
  10   0   3    0.50    2.40
 -10   0  -3    4.80    2.70
 -10   0  -3   -1.90    2.30
 -10   0  -3   -0.80    2.40
  10   0   3    1.90    2.50
 -10   0  -3    3.70    2.70
 -10   0  -3   -0.40    2.20
  10   0   3   -1.30    2.10
 -12   0  -3    2.40    2.70
 -12   0  -3   -0.40    2.70
  12   0   3    0.20    2.00
 -12   0  -3    1.40    2.80
  12   0   3   -1.00    2.20
 -12   0  -3   -2.40    2.40
 -12   0  -3   -2.10    2.80
  14   0   3    4.20    2.40
  14   0   3    3.40    2.30
 -14   0  -3    2.30    3.20
 -14   0  -3    3.60    3.30
 -14   0  -3    4.40    3.00
 -14   0  -3   -0.30    2.80
 -14   0  -3    4.50    2.90
 -16   0  -3    2.60    3.30
 -16   0  -3    1.70    3.50
 -16   0  -3    1.10    3.50
 -16   0  -3   -5.20    3.30
 -18   0  -3   -2.70    3.60
 -18   0  -3    0.70    3.60
 -18   0  -3   -3.70    3.70
 -18   0  -3   -2.60    3.80
 -20   0  -3   -5.10    4.30
 -20   0  -3    2.70    3.90
 -20   0  -3   -1.50    4.50
 -20   0  -3   -1.20    4.10
 -22   0  -3    3.60    5.00
 -22   0  -3    0.00    5.20
 -22   0  -3    9.90    4.90
 -22   0  -3   -3.50    4.70
 -24   0  -3    1.80    5.10
 -24   0  -3  -12.20    5.60
 -24   0  -3    0.20    5.10
 -26   0  -3    7.50    5.60
 -26   0  -3   -3.10    5.30
 -28   0  -3    8.90    6.80
 -28   0  -3    3.30    6.20
 -30   0  -3    1.40    6.20
 -30   0  -3    8.10    6.50
 -33  -1   3    2.10    6.60
 -33  -1   3   13.80    6.40
 -31  -1   3   -6.30    6.00
 -31  -1   3    6.50    6.30
 -31   1   3    1.70    5.70
 -31   1   3   -3.50    6.00
 -29  -1   3   26.90   11.50
 -29  -1   3   13.60    6.20
 -29   1   3   16.50    6.20
 -29   1   3   19.50    6.60
 -27  -1   3   90.59    9.80
 -27  -1   3   74.09    8.80
 -27   1   3   69.89    8.20
 -27   1   3   81.69    9.50
 -25  -1   3    2.80    5.20
 -25  -1   3   -0.10    4.80
 -25   1   3   -0.90    6.40
 -25   1   3    0.70    4.90
 -25   1   3   -1.10    4.40
 -25   1   3    0.60    5.20
 -23  -1   3   11.50    5.10
 -23  -1   3    9.00    4.70
 -23   1   3    4.40    4.80
 -23   1   3    2.90    4.60
 -23   1   3    2.60    4.50
 -23   1   3   10.10    4.90
 -21  -1   3   14.20    4.90
 -21  -1   3   23.90    5.40
 -21  -1   3   21.00    5.60
 -21   1   3   22.10    5.20
 -21   1   3   34.90    5.30
 -21   1   3   19.40    4.70
 -21   1   3   14.20    4.70
 -19  -1   3   11.80    4.70
 -19  -1   3   16.10    5.20
 -19  -1   3    5.10    4.60
 -19  -1   3    5.60    4.20
 -19   1   3    6.70    4.20
 -19   1   3    3.50    4.30
 -17  -1   3  768.92   26.00
 -17  -1   3  767.52   25.70
 -17  -1   3  799.52   25.80
  17  -1  -3  879.71   24.40
 -17  -1   3  812.72   26.20
 -17  -1   3  808.52   25.70
  17   1  -3  783.72   25.30
  17   1  -3  830.72   26.60
 -17   1   3  896.31   25.80
 -17   1   3  839.32   23.60
 -17   1   3  908.31   25.30
  15  -1  -3    2.40    2.30
 -15   1   3    8.20    2.30
 -15   1   3    6.00    3.10
 -15   1   3    5.30    3.30
  13  -1  -3  154.68    6.30
 -13  -1   3  133.29    5.60
 -13  -1   3  143.79    7.50
 -13  -1   3  152.78    7.60
 -13  -1   3  154.18    7.40
  13  -1  -3  141.89    6.20
 -13  -1   3  136.49    7.20
 -13  -1   3  138.69    7.40
 -13   1   3  143.49    7.00
  13   1  -3  150.48    7.80
  13   1  -3  139.29    7.20
 -13   1   3  143.49    6.80
  11  -1  -3    3.70    2.80
 -11  -1   3   15.10    3.20
 -11  -1   3   15.60    3.40
 -11  -1   3   11.50    3.10
  11  -1  -3    5.60    2.20
 -11  -1   3   14.80    3.20
 -11   1   3    1.90    2.40
 -11   1   3    4.30    2.70
  -9  -1   3  375.76   12.40
  -9  -1   3  359.86   12.50
   9  -1  -3  392.56   11.60
  -9  -1   3  354.26   11.40
   9  -1  -3  384.56   11.70
  -9  -1   3  376.56   12.60
   9  -1  -3  393.06   11.10
  -9  -1   3  374.16   12.10
  -9  -1   3  371.16   12.60
   9   1  -3  383.66   12.60
   9   1  -3  362.46   12.20
  -9   1   3  394.56   12.20
  -9   1   3  377.76   11.80
  -7  -1   3  111.39    5.10
   7  -1  -3  118.69    5.00
  -7  -1   3  115.99    5.70
  -7  -1   3  120.79    5.70
   7  -1  -3  107.79    4.80
   7  -1  -3  114.09    4.90
  -7  -1   3  116.19    5.60
  -7  -1   3  110.89    5.10
  -7  -1   3  108.29    5.60
   7   1  -3  119.49    5.50
   7   1  -3  106.09    5.20
   7   1  -3  114.39    5.60
  -7   1   3  113.09    5.10
  -7   1   3  114.59    5.20
  -5  -1   3  461.85   13.70
   5  -1  -3  469.95   14.10
  -5  -1   3  463.05   13.80
  -5  -1   3  460.65   14.00
   5  -1  -3  479.65   13.60
  -5  -1   3  516.35   15.10
  -5  -1   3  453.65   13.40
   5   1  -3  450.95   13.50
  -5   1   3  488.65   13.90
   5   1  -3  443.46   13.80
  -5   1   3  484.25   13.70
   5   1  -3  448.06   13.80
   5   1  -3  461.75   14.00
  -3  -1   3 1962.10   52.09
   3  -1  -3 1891.91   52.59
  -3  -1   3 1949.30   52.39
   3  -1  -3 1986.60   52.59
   3  -1  -3 2026.50   52.59
   3  -1  -3 2032.70   52.79
  -3  -1   3 1963.20   52.89
  -3  -1   3 2031.80   52.69
   3   1  -3 1941.21   52.69
  -3   1   3 2011.70   53.19
   3   1  -3 1980.80   52.49
  -3   1   3 2004.10   52.89
  -3   1   3 2008.00   52.69
   3   1  -3 1959.70   52.89
   1  -1  -3 1015.00   27.30
   1  -1  -3 1002.80   26.90
  -1  -1   3  945.31   27.10
  -1  -1   3  971.10   26.20
  -1  -1   3  975.10   26.80
   1  -1  -3  977.10   26.90
   1  -1  -3 1008.40   27.10
   1   1  -3  958.60   26.40
  -1   1   3 1013.90   27.40
   1   1  -3  994.40   27.10
  -1   1   3  988.20   26.90
   1   1  -3  956.80   26.30
  -1   1   3  993.60   27.20
  -1   1   3  943.21   26.90
   1   1  -3  937.21   27.00
  -1   1   3 1020.80   27.00
   1  -1   3   26.80    2.90
   1  -1   3   33.80    3.70
  -1  -1  -3   28.10    3.40
  -1  -1  -3   28.80    3.00
  -1  -1  -3   26.50    3.10
  -1  -1  -3   30.70    3.20
  -1  -1  -3   32.80    3.30
  -1   1  -3   28.40    2.10
   1   1   3   35.80    3.80
  -1   1  -3   30.90    2.90
   1   1   3   28.90    3.40
   1   1   3   32.40    3.10
  -1   1  -3   32.50    3.10
  -1   1  -3   24.80    2.10
   1   1   3   30.60    3.20
   1   1   3   30.80    3.20
  -3  -1  -3  582.94   17.20
  -3  -1  -3  586.54   17.10
   3  -1   3  565.94   17.00
  -3  -1  -3  594.14   16.90
  -3  -1  -3  586.54   17.10
   3  -1   3  521.65   17.00
  -3  -1  -3  587.64   17.70
   3   1   3  577.24   17.20
   3   1   3  595.64   16.90
   3   1   3  575.14   17.20
  -3   1  -3  565.14   16.50
  -3   1  -3  557.24   16.90
   3   1   3  580.94   17.00
   3   1   3  580.24   17.10
   5  -1   3  383.16   12.80
  -5  -1  -3  404.26   13.10
   5  -1   3  396.36   12.40
  -5  -1  -3  409.06   12.90
  -5  -1  -3  414.46   13.00
  -5  -1  -3  406.06   13.10
  -5   1  -3  414.26   13.20
   5   1   3  411.96   13.00
  -5   1  -3  403.06   11.50
  -5   1  -3  409.26   12.20
   5   1   3  397.16   13.00
  -5   1  -3  413.36   11.60
   5   1   3  406.36   12.80
   5   1   3  412.46   13.30
  -5   1  -3  402.16   11.50
   5   1   3  407.06   13.30
  -5   1  -3  419.36   12.50
  -7  -1  -3  363.16   12.20
  -7  -1  -3  358.06   12.40
  -7  -1  -3  356.06   12.10
  -7  -1  -3  374.66   12.20
  -7  -1  -3  359.86   12.30
   7   1   3  371.76   12.50
   7   1   3  363.36   12.20
  -7   1  -3  355.56   10.70
  -7   1  -3  348.57   11.60
  -7   1  -3  356.86   10.80
  -7   1  -3  367.76   11.50
   7   1   3  355.96   12.40
   7   1   3  354.86   12.10
  -7   1  -3  361.36   11.00
  -7   1  -3  351.56   10.80
   7   1   3  355.46   11.90
   9  -1   3    1.80    1.40
  -9  -1  -3    0.10    2.80
  -9  -1  -3    6.00    2.80
  -9  -1  -3   -0.80    2.50
  -9  -1  -3    4.80    2.90
  -9  -1  -3    1.70    2.60
  -9   1  -3    1.40    2.10
  -9   1  -3    2.60    2.10
   9   1   3    0.00    2.70
  -9   1  -3    6.60    2.30
  -9   1  -3    5.30    2.30
   9   1   3    0.70    2.70
  -9   1  -3    1.00    2.10
   9   1   3    1.60    2.50
  -9   1  -3    0.30    2.20
   9   1   3    3.00    3.10
 -11  -1  -3   67.19    5.60
 -11  -1  -3   60.39    5.40
 -11  -1  -3   65.59    5.70
  11  -1   3   64.89    3.50
 -11  -1  -3   78.29    5.50
  11   1   3   67.39    5.20
 -11   1  -3   63.89    4.50
  11   1   3   68.29    5.80
 -11   1  -3   68.69    5.40
  11   1   3   62.49    5.70
 -11   1  -3   71.29    4.60
 -11   1  -3   64.89    4.70
  11   1   3   70.09    5.00
 -11   1  -3   68.19    4.70
  11   1   3   72.79    6.10
  13  -1   3    1.00    1.80
 -13  -1  -3    1.50    3.30
 -13  -1  -3    1.90    3.20
 -13  -1  -3   -2.90    3.00
  13  -1   3    3.90    1.90
 -13  -1  -3   -1.30    3.20
 -13  -1  -3    0.60    3.00
 -13   1  -3   -0.20    2.90
  13   1   3    0.20    3.30
 -13   1  -3    0.50    2.50
 -13   1  -3    0.10    2.80
 -13   1  -3    4.10    2.80
 -13   1  -3    1.30    2.60
  13   1   3    4.90    3.00
  13   1   3   -2.50    4.10
  13   1   3   -0.40    3.30
  15  -1   3   22.80    2.90
 -15  -1  -3   24.90    6.10
 -15  -1  -3   21.70    4.70
 -15  -1  -3   25.80    5.20
 -15   1  -3   18.50    4.00
 -15   1  -3   22.70    4.10
  15   1   3   24.30    5.40
  15   1   3   22.10    4.60
 -15   1  -3   21.50    3.90
 -15   1  -3   23.10    4.00
  15   1   3   20.30    4.70
 -15   1  -3   17.00    4.00
 -17  -1  -3  206.18   10.60
 -17  -1  -3  213.58   10.90
 -17  -1  -3  213.78   11.00
 -17  -1  -3  210.48   10.90
 -17   1  -3  214.58    9.80
 -17   1  -3  203.08    9.50
 -17   1  -3  205.78    9.50
 -17   1  -3  211.08   10.00
 -19  -1  -3   10.20    5.90
 -19  -1  -3    3.00    4.70
 -19  -1  -3   -0.10    4.40
 -19   1  -3    8.80    4.50
 -19   1  -3    5.00    3.80
 -19   1  -3    4.40    3.80
 -19   1  -3    7.70    4.40
 -21  -1  -3   15.00    5.90
 -21  -1  -3   13.50    5.60
 -21  -1  -3   15.80    6.30
 -21   1  -3   14.90    4.60
 -21   1  -3    5.30    4.50
 -21   1  -3   23.80    5.80
 -21   1  -3   12.40    4.90
 -23  -1  -3    3.10    5.30
 -23  -1  -3   -5.70    5.10
 -23   1  -3   -2.70    4.90
 -23   1  -3    1.50    4.80
 -23   1  -3    1.60    4.90
 -25  -1  -3    5.20    5.60
 -25  -1  -3    3.20    5.70
 -25   1  -3    7.50    5.90
 -25   1  -3    9.40    5.70
 -25   1  -3    2.20    4.70
 -27  -1  -3  233.28   15.10
 -27  -1  -3  266.57   14.60
 -27   1  -3  259.27   14.30
 -27   1  -3  251.07   13.70
 -29  -1  -3    4.50    5.60
 -29  -1  -3    8.40    6.50
 -29   1  -3    7.90    6.30
 -29   1  -3   24.30    6.50
 -31  -1  -3   13.70    6.90
 -31   1  -3   22.70    7.10
 -31   1  -3   19.20    6.90
 -32  -2   3   -1.60    5.20
 -32  -2   3    2.30    6.70
 -32   2   3   -1.00    6.30
 -32   2   3    7.30    6.20
 -30  -2   3   10.40    6.90
 -30  -2   3   -1.70    7.20
 -30   2   3   -1.40    5.50
 -30   2   3   -3.00    5.30
 -28  -2   3   -8.40    5.60
 -28  -2   3   16.10    7.30
 -28   2   3   -2.00    5.50
 -28   2   3    9.80    5.70
 -26  -2   3    6.00    5.80
 -26  -2   3    3.90    5.60
 -26   2   3   -2.10    4.10
 -26   2   3    0.70    4.90
 -26   2   3    1.50    5.10
 -24  -2   3   84.49    8.90
 -24  -2   3   80.39    9.40
 -24   2   3   94.69    7.90
 -24   2   3   84.09    8.60
 -24   2   3   88.79    8.60
 -24   2   3   74.49    8.20
 -22  -2   3   46.70    6.70
 -22  -2   3   52.79    7.60
 -22  -2   3   51.79    5.60
 -22   2   3   49.30    6.70
 -22   2   3   55.19    6.50
 -20  -2   3  116.09    8.50
 -20  -2   3  106.79    7.10
 -20  -2   3  115.39    9.00
 -20   2   3  106.79    7.80
 -20   2   3   99.99    8.00
 -18  -2   3   71.49    7.70
 -18  -2   3   53.79    5.90
 -18   2   3   70.49    6.60
 -18   2   3   76.89    6.40
  18   2  -3   66.29    7.30
 -16  -2   3   19.70    4.80
  16  -2  -3   25.90    2.90
  16  -2  -3   22.50    3.60
 -16  -2   3   10.90    4.00
 -16  -2   3   18.50    4.80
 -16   2   3   23.50    2.90
 -16   2   3   22.00    4.40
  16   2  -3   19.20    4.40
  16   2  -3   20.30    4.90
 -16   2   3   26.90    4.10
  14  -2  -3   37.20    2.90
 -14  -2   3   38.00    4.90
 -14  -2   3   37.00    5.40
 -14  -2   3   26.20    4.60
 -14  -2   3   35.30    5.30
 -14  -2   3   47.30    5.30
  14  -2  -3   34.10    3.00
 -14   2   3   36.90    4.30
 -14   2   3   46.80    5.20
  14   2  -3   30.40    5.00
  14   2  -3   35.60    5.00
 -12  -2   3  399.16   13.90
 -12  -2   3  378.96   13.60
 -12  -2   3  392.46   14.10
 -12  -2   3  389.46   14.10
 -12  -2   3  397.86   13.60
 -12  -2   3  402.96   13.40
  12  -2  -3  387.86   11.50
  12   2  -3  384.06   13.80
  12   2  -3  397.76   14.10
 -12   2   3  394.86   12.90
  12   2  -3  405.66   14.30
 -12   2   3  368.96   11.80
 -12   2   3  383.36   12.70
 -10  -2   3  212.98    9.10
 -10  -2   3  224.98    8.80
 -10  -2   3  227.48    9.50
 -10  -2   3  218.58    9.00
  10  -2  -3  204.58    6.80
 -10  -2   3  212.58    8.90
  10  -2  -3  215.28    7.00
 -10  -2   3  229.48    9.00
  10   2  -3  210.28    9.20
 -10   2   3  217.08    8.20
  10   2  -3  198.08    8.70
 -10   2   3  213.78    8.10
  10   2  -3  211.68    9.10
 -10   2   3  192.58    7.10
  -8  -2   3  512.85   16.40
  -8  -2   3  525.65   16.20
   8  -2  -3  524.05   14.80
   8  -2  -3  537.75   14.80
  -8  -2   3  526.05   16.50
  -8  -2   3  517.15   16.10
  -8  -2   3  528.85   16.70
   8  -2  -3  517.05   16.40
   8  -2  -3  496.15   15.00
  -8  -2   3  516.15   16.20
   8  -2  -3  529.25   14.80
   8   2  -3  485.55   16.30
   8   2  -3  513.75   16.60
  -8   2   3  548.85   15.70
  -8   2   3  530.05   15.90
   8   2  -3  530.35   16.30
  -6  -2   3  122.99    5.80
  -6  -2   3  121.09    5.70
  -6  -2   3  142.89    6.90
  -6  -2   3  123.99    6.30
   6  -2  -3  129.69    5.20
   6  -2  -3  129.29    4.90
  -6  -2   3  125.39    6.30
   6  -2  -3  132.39    5.10
   6  -2  -3  132.09    5.10
   6  -2  -3  128.99    6.60
   6  -2  -3  125.79    4.90
   6   2  -3  135.59    6.20
  -6   2   3  127.59    5.80
  -6   2   3  125.09    5.60
  -6   2   3  121.49    7.10
   6   2  -3  130.39    6.00
   6   2  -3  123.89    6.10
   4  -2  -3  172.98    6.40
  -4  -2   3  177.68    7.40
   4  -2  -3  172.78    6.40
  -4  -2   3  179.28    6.60
  -4  -2   3  175.78    7.50
   4  -2  -3  183.48    8.00
  -4  -2   3  184.08    8.10
   4  -2  -3  176.78    6.40
  -4  -2   3  175.58    6.70
   4  -2  -3  188.78    7.20
  -4  -2   3  175.78    6.60
   4   2  -3  173.28    7.10
   4   2  -3  177.58    7.10
  -4   2   3  201.08    7.40
  -4   2   3  177.78    6.90
  -4   2   3  185.38    7.00
  -4   2   3  182.08    6.80
  -4   2   3  192.58    8.20
   4   2  -3  182.08    6.90
  -2  -2   3 2349.67   62.59
   2  -2  -3 2339.07   61.39
   2  -2  -3 2289.37   61.29
  -2  -2   3 2313.07   61.39
   2  -2  -3 2257.67   61.39
  -2  -2   3 2225.28   60.49
   2  -2  -3 2301.97   61.39
  -2  -2   3 2325.07   61.99
  -2  -2   3 2230.08   60.59
   2  -2  -3 2419.46   61.49
  -2   2   3 2302.07   62.69
   2   2  -3 2303.77   61.39
  -2   2   3 2261.37   61.69
  -2   2   3 2345.17   61.79
  -2   2   3 2298.07   61.99
   2   2  -3 2316.57   61.09
   2   2  -3 2301.37   61.29
  -2   2   3 2262.27   61.49
   0  -2  -3  518.15   15.80
   0  -2   3  491.35   15.40
   0  -2  -3  500.95   16.00
   0  -2   3  521.05   16.20
   0  -2  -3  502.15   15.00
   0   2   3  494.45   15.30
   0   2  -3  489.75   14.70
   0   2   3  493.25   15.30
   0   2   3  501.55   15.20
   0   2  -3  491.85   14.20
   0   2   3  483.25   16.00
   0   2  -3  488.85   14.00
   0   2  -3  502.05   15.10
   0   2   3  493.85   15.60
   2  -2   3  101.29    5.50
   2  -2   3  101.19    6.10
  -2  -2  -3   99.09    5.50
  -2  -2  -3   95.39    5.30
   2   2   3   96.59    5.30
   2   2   3   89.59    5.60
   2   2   3   88.39    6.40
   2   2   3   93.49    5.60
  -2   2  -3  103.49    4.90
   2   2   3  103.29    5.60
  -2   2  -3   99.89    5.00
  -4  -2  -3    7.20    2.90
   4  -2   3   12.00    3.10
  -4  -2  -3    8.60    3.30
  -4  -2  -3    8.50    3.00
   4  -2   3    7.10    2.70
  -4  -2  -3    5.70    2.60
  -4  -2  -3    4.10    2.50
   4   2   3    7.20    3.00
   4   2   3    4.60    3.40
   4   2   3    9.10    3.00
   4   2   3    8.20    3.20
   4   2   3    8.20    2.70
  -6  -2  -3   95.29    6.00
  -6  -2  -3   94.89    5.60
  -6  -2  -3   88.49    5.70
   6  -2   3   94.49    6.20
   6  -2   3   91.79    5.50
  -6  -2  -3   79.59    5.60
  -6  -2  -3   86.79    5.70
   6   2   3   91.29    6.30
   6   2   3   83.79    5.90
   6   2   3   89.69    6.50
   6   2   3   80.99    5.60
   8  -2   3    1.30    2.80
  -8  -2  -3   -0.60    2.60
   8  -2   3    3.00    3.10
  -8  -2  -3    3.00    3.20
  -8  -2  -3    2.00    3.00
   8   2   3    0.40    3.20
   8   2   3    0.20    3.10
   8   2   3   -0.20    2.80
   8   2   3    6.30    3.50
  10  -2   3    4.60    3.20
 -10  -2  -3    8.30    3.20
 -10  -2  -3   13.50    4.00
 -10  -2  -3    3.50    3.50
 -10  -2  -3   10.40    3.30
  10   2   3    5.90    3.30
 -10   2  -3    8.40    2.20
  10   2   3    5.30    3.80
 -10   2  -3    6.90    2.10
  10   2   3    5.90    3.70
  10   2   3    8.50    4.00
 -12  -2  -3  220.78   10.40
 -12  -2  -3  223.78   10.70
 -12  -2  -3  195.98   10.10
  12   2   3  224.38   11.00
  12   2   3  217.08   11.00
  12   2   3  207.58   10.30
 -12   2  -3  206.58    7.90
  12   2   3  217.08   10.00
 -14  -2  -3    1.30    4.70
 -14  -2  -3    1.60    4.20
 -14   2  -3   -0.70    2.60
  14   2   3    1.20    3.90
 -14   2  -3    0.70    2.80
 -14   2  -3    0.60    2.80
  14   2   3   -0.40    3.90
 -14   2  -3   -1.50    2.80
  14   2   3    1.70    4.80
  14   2   3    8.50    4.00
 -16  -2  -3  133.19    9.40
 -16  -2  -3  147.59    9.70
 -16   2  -3  146.89    7.40
  16   2   3  137.89    9.90
 -16   2  -3  144.59    7.20
  16   2   3  143.69    9.40
 -16   2  -3  139.29    7.60
 -16   2  -3  137.49    7.10
  16   2   3  137.69    9.80
 -18  -2  -3   37.60    6.60
 -18  -2  -3   43.80    7.00
 -18   2  -3   49.70    5.20
 -18   2  -3   45.00    5.50
 -18   2  -3   43.80    5.10
 -18   2  -3   40.30    5.20
  18   2   3   36.90    7.30
 -20  -2  -3  105.09    9.70
 -20  -2  -3  112.19    9.80
 -20   2  -3   98.89    7.80
 -20   2  -3  109.39    7.50
 -20   2  -3  118.69    7.80
 -20   2  -3  104.99    7.50
 -22  -2  -3   -3.40    5.60
 -22  -2  -3   -3.90    5.50
 -22   2  -3    2.30    4.20
 -22   2  -3    6.60    4.10
 -22   2  -3    5.20    4.00
 -22   2  -3   -0.30    4.20
 -24  -2  -3   30.80    7.50
 -24  -2  -3   15.50    7.50
 -24   2  -3   23.60    5.80
 -24   2  -3   27.80    5.80
 -24   2  -3   24.40    5.70
 -26  -2  -3    5.00    6.50
 -26  -2  -3    3.10    5.90
 -26   2  -3    2.80    5.30
 -26   2  -3    1.90    5.30
 -28  -2  -3    6.50    6.90
 -28  -2  -3   13.00    5.20
 -28  -2  -3    7.60    6.10
 -28   2  -3    1.30    4.90
 -28   2  -3   -6.10    4.90
 -29  -3   3   -7.70    5.90
 -29   3   3    2.90    5.60
 -27  -3   3    4.60    7.20
 -27  -3   3    2.30    4.60
 -27  -3   3    3.30    5.60
 -27   3   3   14.20    5.50
 -27   3   3    6.60    4.60
 -25  -3   3   12.40    5.00
 -25  -3   3   10.20    6.00
 -25  -3   3   13.70    6.20
 -25   3   3   26.20    5.30
 -25   3   3   11.00    5.20
 -23  -3   3    5.40    4.40
 -23  -3   3    4.20    5.00
 -23  -3   3   14.10    5.50
 -23   3   3    9.50    5.00
 -23   3   3    9.20    4.30
 -23   3   3    7.50    4.40
 -23   3   3   11.30    4.80
 -21  -3   3  105.79    8.90
 -21  -3   3   95.29    8.10
 -21  -3   3   78.79    9.00
 -21   3   3   86.59    7.50
 -21   3   3   84.89    7.50
 -19  -3   3   24.70    5.50
  19  -3  -3   24.70    4.50
 -19  -3   3   22.00    5.70
 -19  -3   3   15.20    5.10
 -19   3   3   17.70    4.70
 -19   3   3   22.10    4.80
 -17  -3   3   12.30    4.50
 -17  -3   3   20.10    5.10
 -17  -3   3   13.70    4.90
  17  -3  -3    4.60    3.80
  17   3  -3    7.80    5.50
 -17   3   3    2.50    3.40
 -17   3   3    5.40    3.70
  17   3  -3   35.20    8.70
 -15  -3   3   13.30    5.20
  15  -3  -3   17.80    4.40
 -15  -3   3   19.00    4.60
 -15  -3   3   19.00    4.60
 -15   3   3   19.20    4.00
  15   3  -3   24.90    4.70
  15   3  -3   28.20    5.90
  15   3  -3   21.40    5.70
 -15   3   3   15.90    4.10
 -13  -3   3    0.00    3.50
  13  -3  -3   -0.10    3.70
 -13  -3   3    7.00    3.60
 -13  -3   3   -1.30    3.90
  13   3  -3    0.40    4.20
  13   3  -3    0.20    3.50
 -13   3   3    5.80    3.20
 -13   3   3    1.50    3.10
 -13   3   3   -3.60    4.50
  13   3  -3    9.20    3.50
 -11  -3   3   47.90    5.30
 -11  -3   3   41.00    5.10
 -11  -3   3   47.60    5.90
  11  -3  -3   38.30    5.60
 -11  -3   3   39.80    5.20
 -11  -3   3   50.89    6.00
  11  -3  -3   43.90    4.30
 -11   3   3   52.39    6.70
 -11   3   3   33.90    4.30
  11   3  -3   44.20    5.50
 -11   3   3   40.90    4.30
  11   3  -3   40.80    6.00
  11   3  -3   43.60    5.70
   9  -3  -3   68.89    5.10
  -9  -3   3   66.09    7.10
  -9  -3   3   67.59    6.50
  -9  -3   3   73.49    5.50
   9  -3  -3   73.79    6.70
  -9  -3   3   63.99    5.40
  -9   3   3   71.79    7.30
   9   3  -3   67.99    6.20
   9   3  -3   75.89    6.70
  -9   3   3   69.39    5.40
   9   3  -3   64.99    5.90
  -7  -3   3   24.60    3.80
  -7  -3   3   15.50    4.20
  -7  -3   3   22.00    3.20
  -7  -3   3   26.70    4.70
   7  -3  -3    4.90    3.80
   7  -3  -3    7.90    3.00
  -7   3   3    7.20    3.10
  -7   3   3   14.30    3.50
  -7   3   3   12.60    4.60
  -5  -3   3   72.09    5.90
  -5  -3   3   73.09    7.10
  -5  -3   3   63.49    4.30
  -5  -3   3   71.49    4.20
   5  -3  -3   65.09    6.70
  -5  -3   3   68.19    4.80
   5  -3  -3   71.69    5.20
  -5  -3   3   61.59    6.10
  -5   3   3   69.69    5.30
   5   3  -3   65.89    5.80
  -5   3   3   71.59    5.50
  -5   3   3   64.69    4.80
  -5   3   3   59.29    4.70
   5   3  -3   66.79    5.40
   5   3  -3   73.59    5.10
   3  -3  -3    9.90    2.40
  -3  -3   3    3.40    4.00
   3  -3  -3    7.90    2.40
   3  -3  -3    5.40    3.90
  -3  -3   3   10.30    3.70
   3  -3  -3   11.60    2.30
   3  -3  -3   11.30    2.50
   3  -3  -3    9.40    3.30
  -3   3   3   13.30    4.90
  -3   3   3    6.80    3.40
   3   3  -3    9.10    3.50
  -3   3   3    7.70    2.70
  -3   3   3    9.00    3.00
   3   3  -3    9.70    2.80
  -3   3   3    9.00    3.20
   3   3  -3    7.60    2.80
   1  -3  -3  117.29    6.50
  -1  -3   3  113.69    7.00
   1  -3  -3  118.69    5.80
   1  -3  -3  109.79    7.10
  -1  -3   3  128.09    8.20
   1  -3  -3  132.79    8.30
   1  -3  -3  117.69    5.70
   1   3  -3  118.09    5.60
  -1   3   3  127.49    8.80
   1   3  -3  119.69    5.80
  -1   3   3  111.69    6.90
  -1   3   3  118.29    6.60
   1   3  -3  114.69    6.80
  -1   3   3  114.19    6.30
   1  -3   3  277.57   11.10
  -1  -3  -3  274.47    9.80
  -1  -3  -3  276.87   10.00
  -1  -3  -3  262.57   12.00
   1  -3   3  275.97   12.10
  -1  -3  -3  290.07   10.20
  -1  -3  -3  269.37   11.30
  -1  -3  -3  277.97   10.10
   1   3   3  276.27   11.20
   1   3   3  277.07   11.00
   1   3   3  266.17   10.60
  -1   3  -3  273.37    9.10
   1   3   3  279.27   10.50
  -1   3  -3  258.77   10.30
   3  -3   3   15.60    4.70
  -3  -3  -3   20.70    3.70
  -3  -3  -3   17.70    3.40
  -3  -3  -3   22.60    4.60
   3  -3   3   12.00    4.10
  -3  -3  -3   19.40    4.80
   3   3   3   15.20    4.30
   3   3   3   11.70    4.00
   3   3   3   21.40    4.00
  -3   3  -3   19.40    4.10
   3   3   3   20.60    3.80
   3   3   3   17.90    5.00
   5  -3   3   48.60    6.40
  -5  -3  -3   48.00    5.30
  -5  -3  -3   45.40    5.20
  -5  -3  -3   58.19    6.80
   5  -3   3   48.90    5.30
   5   3   3   45.00    5.40
   5   3   3   50.69    6.00
   5   3   3   46.90    6.40
  -5   3  -3   49.00    5.30
   5   3   3   52.09    5.50
   5   3   3   48.80    5.50
  -7  -3  -3   50.09    5.70
  -7  -3  -3   50.59    5.60
   7  -3   3   54.69    5.70
   7  -3   3   43.00    6.10
   7   3   3   52.79    6.70
   7   3   3   45.90    5.70
   7   3   3   42.40    5.90
   7   3   3   51.99    6.00
  -7   3  -3   52.49    5.70
   7   3   3   54.39    6.70
   9  -3   3   73.09    6.70
   9  -3   3   75.19    7.50
  -9  -3  -3   73.79    6.90
  -9  -3  -3   76.69    6.90
   9   3   3   78.19    7.70
   9   3   3   71.59    6.80
   9   3   3   70.69    7.70
  -9   3  -3   75.49    7.10
   9   3   3   71.49    7.30
   9   3   3   61.29    6.60
  11  -3   3  271.37   11.30
 -11  -3  -3  277.37   12.60
  11  -3   3  277.47   12.50
 -11  -3  -3  273.17   12.20
  11   3   3  281.07   13.70
  11   3   3  247.28   11.80
  11   3   3  266.57   12.70
  11   3   3  265.47   13.00
  11   3   3  263.97   13.00
 -13  -3  -3  223.08   12.10
  13  -3   3  221.78   11.40
 -13  -3  -3  226.78   11.50
  13   3   3  230.68   12.10
  13   3   3  221.08   12.40
  13   3   3  226.08   12.60
  13   3   3  228.68   11.60
 -15  -3  -3   50.39    6.80
 -15  -3  -3   45.50    6.80
  15   3   3   41.40    7.00
  15   3   3   56.29    7.80
  15   3   3   43.10    8.10
 -17  -3  -3   34.60    6.40
 -17  -3  -3   40.10    7.30
 -17   3  -3   32.50    4.20
  17   3   3   21.20    6.40
 -17   3  -3   25.90    3.60
  17   3   3   41.80    8.10
  17   3   3   23.90    6.30
 -19  -3  -3    7.20    5.20
 -19  -3  -3    8.90    5.30
 -19  -3  -3    3.60    5.40
 -19   3  -3    7.00    3.30
 -19   3  -3    3.50    3.50
 -21  -3  -3   44.40    7.60
 -21  -3  -3   40.40    7.30
 -21  -3  -3   47.80    8.00
 -21   3  -3   35.40    4.80
 -21   3  -3   36.10    5.30
 -23  -3  -3   46.30    7.00
 -23  -3  -3   19.10    6.90
 -23  -3  -3   54.49    9.60
 -23   3  -3   24.60    6.20
 -23   3  -3   35.10    5.20
 -23   3  -3   25.50    5.20
 -25  -3  -3   44.30   14.70
 -25  -3  -3   34.40    8.00
 -25  -3  -3   36.30    6.60
 -25   3  -3   33.90    5.20
 -25   3  -3   40.60    5.90
 -27  -3  -3   10.70    8.00
 -27  -3  -3    2.30    6.50
 -27  -3  -3    5.60    5.80
 -27   3  -3   12.90    4.90
 -26  -4   3   20.30    7.70
 -26  -4   3   35.20    6.80
 -24  -4   3    1.40    5.20
 -24  -4   3  -10.90    5.60
 -24   4   3    5.70    4.20
 -24   4   3    6.40    6.60
 -22  -4   3    0.40    6.00
 -22  -4   3   -2.50    4.80
 -22  -4   3    8.50    6.60
 -22  -4   3    5.50    5.00
 -22   4   3    3.80    4.10
 -22   4   3    1.00    6.70
 -22   4   3   10.00    4.00
 -22   4   3   -1.60    4.50
 -20  -4   3    5.70    5.00
 -20  -4   3   -6.10    5.60
 -20  -4   3    3.20    5.20
 -20  -4   3   -1.40    5.30
  20  -4  -3   -0.50    5.00
 -20   4   3    5.60    6.90
 -20   4   3    9.30    4.00
  18  -4  -3   27.10    6.10
 -18  -4   3   33.40    7.30
 -18  -4   3   22.10    5.50
 -18  -4   3   24.00    5.00
 -18  -4   3   33.60    7.00
 -18   4   3   29.60    8.20
  18   4  -3   34.50    7.70
 -18   4   3   29.50    7.80
 -16  -4   3    9.50    5.90
 -16  -4   3   17.20    4.40
  16  -4  -3   23.60    5.70
 -16  -4   3   24.00    6.10
 -16   4   3   29.60    7.10
 -16   4   3   13.30    4.10
  16   4  -3   17.00    6.50
  16   4  -3   42.10    7.90
 -14  -4   3    4.80    5.50
 -14  -4   3    0.30    3.60
  14  -4  -3    5.30    3.80
 -14  -4   3    1.20    5.10
  14  -4  -3    5.70    4.90
 -14   4   3    9.00    5.70
  14   4  -3    3.60    5.10
  14   4  -3   -6.60    4.80
 -14   4   3    7.50    3.50
  14   4  -3    1.00    7.80
 -12  -4   3   50.69    5.90
 -12  -4   3   50.29    7.10
 -12  -4   3   43.80    5.30
  12  -4  -3   56.79    7.60
 -12  -4   3   52.49    7.80
  12  -4  -3   57.09    5.90
 -12   4   3   55.79    8.70
  12   4  -3   46.60    6.70
 -12   4   3   54.39    5.60
  12   4  -3   43.80    6.90
 -12   4   3   62.79    5.70
  12   4  -3   61.79    7.80
 -10  -4   3    6.70    3.40
 -10  -4   3   11.60    3.40
 -10  -4   3    1.90    4.70
  10  -4  -3    5.80    4.70
  10  -4  -3    2.20    3.70
 -10  -4   3   -7.40    8.60
 -10   4   3    4.70    3.40
  10   4  -3   11.00    5.30
 -10   4   3    7.80    5.30
  10   4  -3    2.10    4.00
  10   4  -3    4.80    4.30
 -10   4   3    1.50    3.50
  -8  -4   3    2.00    2.90
  -8  -4   3    5.40    2.70
  -8  -4   3    9.70    6.50
   8  -4  -3   -6.00    3.50
   8  -4  -3    8.10    5.00
  -8  -4   3   -1.90    4.60
   8   4  -3   14.20    4.00
   8   4  -3    2.50    4.00
  -8   4   3    1.40    4.60
  -8   4   3    7.70    3.70
   8   4  -3    1.50    4.70
  -8   4   3    1.70    3.60
  -6  -4   3   15.60    5.30
  -6  -4   3   17.60    5.70
   6  -4  -3   17.50    6.10
   6  -4  -3   11.80    4.30
   6   4  -3   16.70    4.00
  -6   4   3   17.70    4.40
   6   4  -3   18.20    4.50
  -6   4   3   17.70    4.00
   6   4  -3   18.10    4.90
  -6   4   3   10.20    5.60
   4  -4  -3    6.30    5.50
  -4  -4   3    2.00    4.40
   4  -4  -3    2.00    3.80
  -4  -4   3    2.80    4.90
   4   4  -3    2.40    3.10
  -4   4   3    2.20    3.30
  -4   4   3   -1.30    3.60
  -4   4   3    2.20    3.00
   4   4  -3   -0.10    6.50
   4   4  -3   -1.60    4.00
  -4   4   3   -2.90    3.70
  -4   4   3    6.40    5.30
   2  -4  -3   51.49    7.70
   2  -4  -3   42.90    5.50
  -2  -4   3   39.10    6.00
  -2  -4   3   34.50    7.00
  -2   4   3   36.80    5.70
  -2   4   3   35.20    4.80
  -2   4   3   41.80    6.90
  -2   4   3   36.70    5.40
   2   4  -3   40.00    4.40
   2   4  -3   44.20    5.00
  -2   4   3   34.90    4.60
   0  -4  -3    7.00    4.20
   0  -4  -3    1.50    4.80
   0  -4   3    5.40    5.70
   0  -4   3    3.40    4.70
   0  -4  -3    8.40    2.60
   0   4   3   -3.50    4.00
   0   4  -3    0.20    2.80
   0   4   3    8.20    5.20
   0   4  -3    6.30    3.00
   0   4   3   10.00    3.90
   0   4   3    3.40    3.90
   0   4   3    1.10    3.80
   2  -4   3    7.30    4.60
  -2  -4  -3    5.10    4.20
  -2  -4  -3    2.70    4.70
   2  -4   3    6.10    4.60
  -2  -4  -3    9.80    4.30
   2   4   3    7.30    5.30
   2   4   3   10.60    4.20
   2   4   3    3.80    4.50
  -2   4  -3    6.90    2.70
  -2   4  -3    9.40    5.30
   2   4   3   10.80    4.50
   2   4   3   18.00    4.20
  -4  -4  -3    0.20    4.40
   4  -4   3    6.30    6.30
  -4  -4  -3    2.90    3.40
  -4  -4  -3    4.60    3.30
   4  -4   3   -0.60    4.30
  -4   4  -3   -0.90    4.40
   4   4   3    6.60    4.10
   4   4   3    9.90    4.40
   4   4   3   -1.70    4.20
   4   4   3    8.20    4.70
   4   4   3    0.20    4.80
   6  -4   3    4.20    4.60
  -6  -4  -3    1.50    3.40
  -6  -4  -3    0.00    3.50
  -6  -4  -3   -1.40    4.90
   6   4   3   -0.70    5.40
   6   4   3    6.20    4.80
  -6   4  -3    2.00    4.50
   6   4   3   -1.30    4.80
   6   4   3    2.10    6.50
   6   4   3    1.30    4.20
   8  -4   3   43.20    7.70
   8  -4   3   42.80    6.50
  -8  -4  -3   46.50    5.80
  -8  -4  -3   41.80    7.40
   8   4   3   49.99    6.90
   8   4   3   40.80    6.20
   8   4   3   44.10    7.50
   8   4   3   43.80    7.60
  -8   4  -3   50.29    6.70
   8   4   3   53.19    7.80
 -10  -4  -3   10.50    5.00
 -10  -4  -3   14.90    6.50
 -10  -4  -3    9.20    6.40
  10  -4   3   11.20    5.70
  10  -4   3    7.90    4.90
  10   4   3    9.40    5.80
 -10   4  -3    2.60    5.10
  10   4   3    5.00    5.10
  10   4   3    4.70    5.70
  10   4   3    2.20    5.50
  12  -4   3   27.40    7.10
 -12  -4  -3   14.80    5.50
  12  -4   3   15.10    4.80
 -12  -4  -3    6.40    4.70
 -12  -4  -3    8.00    5.90
  12   4   3    4.70    5.20
 -12   4  -3   20.20    6.00
  12   4   3    5.50    6.20
  12   4   3    7.90    6.00
  12   4   3    1.40    5.50
 -14  -4  -3   13.20    5.30
 -14  -4  -3   10.00    7.10
 -14  -4  -3   10.80    6.20
  14  -4   3   16.90    6.10
  14   4   3   11.20    6.30
 -14   4  -3   18.60    6.00
  14   4   3   13.90    6.50
 -16  -4  -3   95.99   10.90
 -16  -4  -3  109.69    9.70
 -16  -4  -3  114.09   10.10
  16   4   3  118.69   13.80
 -16   4  -3  100.09   10.50
  16   4   3  100.59   11.10
  16   4   3  105.39   10.20
 -18  -4  -3   10.70    6.10
 -18  -4  -3   13.60    6.10
 -18  -4  -3   11.40    5.90
  18   4   3   13.40    7.40
 -18   4  -3   16.90    7.30
 -20  -4  -3    3.20    5.90
 -20  -4  -3   15.20    7.40
 -20  -4  -3    2.40    6.00
 -20   4  -3    6.10    6.70
  20   4   3    9.80    7.30
 -22  -4  -3   17.60    7.00
 -22  -4  -3   -4.50    5.90
 -22  -4  -3  -14.60    9.90
 -19  -5   3   -0.90    6.00
  19  -5  -3    3.50    6.30
 -19  -5   3   12.20    6.70
 -19   5   3    2.70    7.10
 -17  -5   3   20.80    6.90
  17  -5  -3   21.00    7.30
 -17  -5   3   22.60    7.90
  17   5  -3    8.90    6.80
 -17   5   3   17.40    8.40
 -15  -5   3   31.80    8.00
  15  -5  -3   32.00    7.20
  15   5  -3   45.10    8.00
 -15   5   3   45.60    8.80
 -13  -5   3   24.30    7.40
  13  -5  -3   25.30    5.30
  13  -5  -3   22.60    6.70
 -13  -5   3   29.90    8.30
 -13   5   3   43.80    9.00
 -11  -5   3    6.50    6.30
  11  -5  -3    4.50    5.90
 -11  -5   3    5.30    6.80
  11  -5  -3   10.30    4.60
 -11   5   3    8.00    6.50
  11   5  -3   12.10    5.40
 -11   5   3    2.20    3.60
   9  -5  -3   12.60    6.60
  -9  -5   3    8.90    6.40
   9  -5  -3   14.00    5.00
  -9  -5   3    5.60    7.00
   9   5  -3   14.20    5.60
  -9   5   3    3.00    4.20
  -9   5   3    6.80    6.10
  -7  -5   3  104.19   11.60
   7  -5  -3  111.09    8.60
  -7  -5   3  111.19   10.20
   7  -5  -3   90.59   10.40
  -7   5   3   94.69    7.80
   7   5  -3  104.99    8.50
   7   5  -3   97.99    9.20
  -7   5   3   97.69    7.60
   5  -5  -3    7.80    6.20
  -5  -5   3   18.10    6.30
   5  -5  -3    2.20    4.40
  -5  -5   3    3.00    6.10
   5   5  -3   10.20    4.60
   5   5  -3   -0.50    4.30
  -5   5   3   -0.20    4.30
   5   5  -3   15.10    5.60
  -5   5   3    9.50    7.80
  -5   5   3   -5.10    4.40
   3  -5  -3  123.99   11.80
  -3  -5   3  156.68   11.40
   3  -5  -3  133.29    9.20
  -3  -5   3  148.19   12.30
  -3   5   3  110.89    8.00
  -3   5   3  119.79    9.50
  -3   5   3  121.59   11.50
   3   5  -3  141.39    8.70
  -3   5   3  140.89   10.10
   3   5  -3  149.99    9.80
   3   5  -3  137.69    7.80
   1  -5  -3    5.20    6.30
   1  -5  -3    5.00    4.70
  -1  -5   3    4.90    6.40
  -1  -5   3    6.70    5.50
  -1   5   3   10.10    4.70
   1   5  -3    5.40    4.10
  -1   5   3    8.10    6.70
  -1   5   3    4.90    5.00
   1   5  -3    8.00    4.50
  -1  -5  -3  -10.00    6.30
   1  -5   3    9.00    6.60
   1  -5   3    0.40    5.20
  -1  -5  -3    4.00    4.80
  -1   5  -3   17.30    5.40
   1   5   3    1.80    6.60
   1   5   3    2.50    4.30
   1   5   3   -2.30    4.80
  -1   5  -3    8.80    3.80
   1   5   3    8.70    5.60
   3  -5   3   13.70    7.20
  -3  -5  -3   16.30    5.80
   3  -5   3   12.60    5.60
  -3  -5  -3    7.10    6.60
   3   5   3   13.20    5.30
   3   5   3   12.20    5.60
   3   5   3   17.20    6.20
  -3   5  -3   25.20    6.20
   5  -5   3   -1.40    5.80
   5  -5   3   13.20    6.00
  -5  -5  -3   15.30    6.20
  -5  -5  -3   17.30    8.00
  -5  -5  -3   10.90    7.30
   5   5   3   11.60    7.00
   5   5   3    0.50    5.40
   5   5   3    8.60    5.50
  -5   5  -3   11.90    5.90
  -7  -5  -3   28.60    6.50
   7  -5   3   26.30    6.30
   7  -5   3   32.60    8.20
  -7  -5  -3   29.80    7.70
   7   5   3   21.40    7.60
   7   5   3   39.50    7.50
  -7   5  -3   20.00    6.40
   7   5   3   25.40    6.50
  -9  -5  -3   -8.60    5.90
   9  -5   3    4.10    7.20
  -9  -5  -3    7.00    5.60
  -9  -5  -3    1.40    5.90
   9  -5   3    9.50    5.70
   9   5   3    5.40    6.20
   9   5   3   14.00    6.20
  -9   5  -3   -4.00    5.50
   9   5   3    5.60    5.60
 -11  -5  -3   11.40    7.70
  11  -5   3   10.70    6.80
 -11  -5  -3   14.90    5.70
  11  -5   3    1.90    5.20
  11   5   3    3.90    5.70
 -11   5  -3    3.60    6.20
  11   5   3   21.90    6.70
  11   5   3   13.40    7.00
  13  -5   3   46.80    9.10
 -13  -5  -3   37.40    9.60
  13   5   3   36.60    8.60
 -13   5  -3   60.09   13.50
  13   5   3   40.90    8.10
  13   5   3   34.70    7.40
  15  -5   3   14.90    6.80
 -15  -5  -3   16.50    7.50
 -15  -5  -3   33.20    9.00
 -15   5  -3    9.30    6.70
  15   5   3   25.20    8.10
 -17  -5  -3   36.80    8.50
 -17   5  -3   27.10    8.30
   8  -6  -3    6.10    8.50
  -8  -6   3    9.90    6.90
   8  -6  -3    8.40   10.10
  -8  -6   3   -1.60    7.50
   8   6  -3    1.90    7.20
  -8   6   3    2.30    8.50
   6  -6  -3   23.50    8.30
   6  -6  -3    9.50    8.10
  -6  -6   3   17.20    8.00
  -6  -6   3   23.10    7.40
  -6   6   3   15.30    8.00
   6   6  -3   31.00    7.50
  -4  -6   3    0.90    7.30
  -4  -6   3    8.90    6.50
   4  -6  -3    3.60    7.30
   4   6  -3    3.50    6.60
  -4   6   3   19.20    7.20
  -4   6   3    5.60    4.50
  -2  -6   3   12.60    6.80
  -2  -6   3   17.60    9.60
   2  -6  -3    7.80    7.70
  -2   6   3   13.00    7.30
   2   6  -3   24.90    7.50
  -2   6   3   23.70    5.70
   0  -6   3   -1.70    7.90
   0  -6   3   -4.00    5.60
   0  -6  -3    6.20    5.80
   0  -6  -3   -3.00    6.30
   0   6   3    8.20    7.40
   0   6   3    3.70    9.50
   0   6   3   10.60    5.80
   0   6  -3    9.10    7.00
  -2  -6  -3   19.00    6.70
  -2  -6  -3    8.40    9.20
   2  -6   3   14.80    6.70
   2  -6   3   26.10    8.60
   2   6   3   15.00    6.70
   2   6   3    3.70    7.10
  -2   6  -3   11.40    7.10
   4  -6   3   21.90   10.00
  -4  -6  -3   -2.10    5.70
  -4  -6  -3    8.10   10.20
   4  -6   3   11.10    6.70
   4   6   3   18.10    8.30
   4   6   3    0.10    5.80
  -4   6  -3   25.00    7.40
   4   6   3    4.40    6.20
  -6  -6  -3   25.60    7.10
   6  -6   3    9.40    5.90
 -34   0   4   -5.80    7.50
 -34   0   4  -14.30    7.60
 -32   0   4   50.19    8.60
 -32   0   4   45.70    9.00
 -30   0   4    6.70    5.40
 -30   0   4    2.40    5.90
 -28   0   4  329.87   17.00
 -28   0   4  349.27   16.30
 -26   0   4   47.00    7.00
 -26   0   4   50.79    7.60
 -26   0   4   60.19    8.70
 -24   0   4  147.49   10.20
 -24   0   4  127.79    9.60
 -24   0   4  106.19    9.30
 -22   0   4   58.39    7.00
 -22   0   4   60.59    7.40
 -22   0   4   54.39    6.60
 -20   0   4  116.99    8.10
 -20   0   4  113.69    8.60
 -20   0   4  120.69    8.60
 -20   0   4  131.09    8.40
 -18   0   4 2244.08   60.39
  18   0  -4 2022.10   61.09
 -18   0   4 2138.69   60.49
 -18   0   4 2260.27   61.09
 -16   0   4 1758.42   49.50
  16   0  -4 1736.83   48.70
 -16   0   4 1763.72   49.10
 -14   0   4  275.87   10.90
 -14   0   4  276.37   10.50
  14   0  -4  273.57   10.50
  14   0  -4  271.87   10.20
  12   0  -4  240.88    9.10
 -12   0   4  235.28    9.20
  12   0  -4  241.18    9.20
 -12   0   4  242.08    9.60
  10   0  -4    3.20    2.30
 -10   0   4    0.90    2.40
  10   0  -4    3.10    2.30
 -10   0   4   -0.10    2.50
  -8   0   4  232.18    8.70
   8   0  -4  246.08    9.40
   8   0  -4  234.98    8.30
  -8   0   4  233.28    8.50
  -6   0   4  679.23   19.50
  -6   0   4  666.63   19.30
   6   0  -4  684.83   19.30
   6   0  -4  673.93   19.40
   4   0  -4  600.34   17.20
  -4   0   4  590.34   17.20
  -4   0   4  599.84   17.10
   4   0  -4  597.24   17.00
  -2   0   4  207.88    7.30
  -2   0   4  206.38    7.10
   2   0  -4  211.78    6.40
  -2   0   4  215.28    7.00
   2   0  -4  206.58    7.10
   2   0  -4  211.28    7.40
   0   0   4 2163.38   57.19
   0   0  -4 2161.58   57.19
   0   0  -4 2115.19   56.99
   0   0   4 2195.68   57.49
   0   0  -4 2165.68   57.09
   0   0  -4 2094.79   57.09
   0   0  -4 2162.08   56.59
   0   0  -4 2159.58   56.69
   2   0   4 1391.76   37.20
  -2   0  -4 1408.56   37.20
   2   0   4 1368.66   36.90
  -2   0  -4 1371.16   37.10
  -2   0  -4 1359.46   37.00
  -2   0  -4 1376.96   36.70
   2   0   4 1343.57   37.00
   2   0   4 1344.47   36.80
  -2   0  -4 1377.96   37.00
  -4   0  -4  651.53   19.00
  -4   0  -4  666.13   18.90
   4   0   4  646.74   18.80
   4   0   4  670.53   19.10
   4   0   4  686.63   19.10
   4   0   4  642.04   18.90
  -4   0  -4  663.03   19.10
  -4   0  -4  684.23   19.00
  -4   0  -4  644.54   18.80
   4   0   4  654.43   18.70
   6   0   4   41.20    3.70
   6   0   4   34.60    3.40
   6   0   4   35.10    3.40
  -6   0  -4   36.90    3.80
  -6   0  -4   37.70    4.00
  -6   0  -4   33.20    3.60
   6   0   4   41.80    3.60
   6   0   4   44.00    4.20
  -6   0  -4   42.00    3.90
  -6   0  -4   36.20    3.60
  -8   0  -4  304.87   10.70
  -8   0  -4  315.77   10.90
  -8   0  -4  304.37   10.50
   8   0   4  312.87   10.50
  -8   0  -4  313.37   10.70
   8   0   4  297.67   10.30
  -8   0  -4  315.37   10.90
   8   0   4  307.67   10.30
   8   0   4  321.17   10.80
  10   0   4  870.11   25.50
  10   0   4  869.41   25.30
 -10   0  -4  900.21   26.20
 -10   0  -4  878.81   25.90
 -10   0  -4  911.31   25.90
  10   0   4  871.51   25.50
  10   0   4  909.01   25.90
 -10   0  -4  864.21   25.60
 -12   0  -4   82.89    5.60
  12   0   4   65.59    4.90
 -12   0  -4   68.69    5.40
  12   0   4   69.89    5.50
  12   0   4   76.49    5.40
 -12   0  -4   80.29    5.90
  12   0   4   73.49    5.80
 -12   0  -4   76.69    5.70
 -12   0  -4   76.59    5.80
 -14   0  -4    3.20    3.50
 -14   0  -4   -0.80    2.90
 -14   0  -4   -7.90    3.30
  14   0   4    2.60    2.90
 -14   0  -4   -0.40    2.60
 -14   0  -4   -2.20    3.20
 -16   0  -4   69.59    6.70
 -16   0  -4   72.19    6.60
 -16   0  -4   79.39    7.00
 -16   0  -4   75.89    6.80
 -18   0  -4   23.20    4.80
 -18   0  -4    9.70    4.50
 -18   0  -4   17.80    5.10
 -18   0  -4   14.70    4.70
 -20   0  -4   10.50    5.00
 -20   0  -4    6.30    4.80
 -20   0  -4    9.00    5.80
 -20   0  -4    1.80    4.60
 -22   0  -4   23.60    5.80
 -22   0  -4   32.60    6.20
 -22   0  -4   15.60    5.60
 -22   0  -4   11.70    6.10
 -24   0  -4  235.88   13.90
 -24   0  -4  207.58   16.10
 -24   0  -4  185.78   14.20
 -26   0  -4  233.98   14.00
 -26   0  -4  245.68   13.70
 -28   0  -4  422.16   18.80
 -28   0  -4  400.36   19.10
 -30   0  -4   -7.10    6.50
 -33  -1   4    1.00    5.80
 -33  -1   4   -1.80    6.30
 -33   1   4    7.70    6.90
 -33   1   4    2.40    9.60
 -31  -1   4   12.60    6.80
 -31  -1   4   19.20    6.80
 -31   1   4    4.60    5.70
 -31   1   4    9.50    6.40
 -29  -1   4    9.40    5.70
 -29  -1   4   -0.30    7.00
 -29   1   4   10.50    6.40
 -29   1   4    2.20    5.90
 -27  -1   4   -3.30    5.00
 -27  -1   4    0.60    5.60
 -27   1   4   12.00    5.20
 -27   1   4   -2.60    7.00
 -25  -1   4   18.90    6.00
 -25  -1   4   30.50    6.60
 -25   1   4   28.10    6.60
 -25   1   4   26.30    7.70
 -25   1   4   26.80    5.90
 -25   1   4   30.40    5.90
 -23  -1   4   50.49    7.20
 -23  -1   4   34.40    6.00
 -23   1   4   57.29   11.40
 -23   1   4   37.50    6.10
 -23   1   4   45.90    6.00
 -23   1   4   36.40    6.20
 -21  -1   4  122.69    9.50
 -21  -1   4  112.29    8.80
 -21  -1   4  113.49    8.50
 -21   1   4  120.09    8.60
 -21   1   4  135.39    8.60
 -19  -1   4  761.92   26.90
 -19  -1   4  792.92   26.60
 -19   1   4  820.12   24.00
 -19   1   4  937.71   26.40
 -19   1   4  901.21   26.70
 -17  -1   4  216.28   10.30
 -17  -1   4  204.78    9.70
 -17  -1   4  217.58   10.70
 -17  -1   4  211.08   10.00
 -17  -1   4  207.38   10.10
  17   1  -4  199.78    9.50
 -15  -1   4   29.00    4.50
  15  -1  -4   33.20    3.80
 -15  -1   4   26.20    4.40
 -15  -1   4   24.30    4.70
  15  -1  -4   25.90    3.90
 -15  -1   4   30.90    4.50
 -15  -1   4   29.40    4.20
 -15   1   4   27.40    2.90
  15   1  -4   31.40    4.30
 -15   1   4   32.50    4.20
 -15   1   4   31.90    4.50
  15   1  -4   31.30    4.50
 -13  -1   4   51.79    5.00
 -13  -1   4   60.69    5.50
  13  -1  -4   32.50    3.70
 -13  -1   4   44.10    3.30
  13  -1  -4   29.30    3.50
 -13  -1   4   44.70    5.10
 -13  -1   4   48.00    4.90
  13   1  -4   34.60    6.00
  13   1  -4   53.09    4.80
 -13   1   4   29.50    3.90
 -13   1   4   35.60    4.30
 -11  -1   4  372.66   12.90
 -11  -1   4  381.26   12.50
 -11  -1   4  369.36   13.10
 -11  -1   4  369.56   12.70
 -11  -1   4  346.77   13.20
 -11  -1   4  363.26   11.30
 -11   1   4  403.36   12.70
  11   1  -4  370.96   13.00
  11   1  -4  375.66   12.70
 -11   1   4  405.36   12.40
  -9  -1   4 1244.28   35.70
   9  -1  -4 1344.17   35.40
   9  -1  -4 1363.16   36.30
  -9  -1   4 1339.47   36.30
   9  -1  -4 1374.96   36.10
  -9  -1   4 1269.27   36.60
  -9  -1   4 1283.77   36.90
  -9   1   4 1354.16   36.60
  -9   1   4 1354.36   36.30
   9   1  -4 1296.67   35.70
   9   1  -4 1299.27   36.60
   9   1  -4 1315.07   36.90
  -7  -1   4   42.70    4.30
  -7  -1   4   47.20    3.50
  -7  -1   4   41.20    4.10
   7  -1  -4   43.60    3.60
  -7  -1   4   41.60    3.50
   7  -1  -4   46.20    3.50
   7   1  -4   56.89    4.00
   7   1  -4   45.00    3.90
  -7   1   4   53.69    4.30
   7   1  -4   46.70    4.10
  -7   1   4   49.50    4.10
   5  -1  -4   68.59    4.00
  -5  -1   4   67.79    4.30
   5  -1  -4   68.09    5.30
  -5  -1   4   70.39    4.60
   5  -1  -4   67.19    3.90
   5  -1  -4   72.79    4.10
  -5  -1   4   73.89    4.10
  -5  -1   4   69.39    4.20
  -5   1   4   65.59    4.40
  -5   1   4   75.19    4.70
   5   1  -4   68.89    4.20
   5   1  -4   71.09    4.20
   5   1  -4   70.29    4.20
   3  -1  -4   55.79    3.80
  -3  -1   4   56.79    3.70
  -3  -1   4   56.59    3.50
   3  -1  -4   53.09    4.70
   3  -1  -4   54.39    3.80
   3  -1  -4   55.49    3.70
  -3  -1   4   47.60    4.30
   3   1  -4   65.39    4.10
   3   1  -4   56.99    3.60
  -3   1   4   60.89    4.10
  -3   1   4   53.19    4.40
   3   1  -4   53.29    3.80
  -3   1   4   58.29    4.10
   3   1  -4   51.79    3.30
  -1  -1   4   24.00    3.00
  -1  -1   4   21.00    3.30
   1  -1  -4   24.70    3.60
  -1  -1   4   19.90    2.10
   1  -1  -4   22.00    2.90
   1  -1  -4   21.70    2.90
   1   1  -4   22.20    2.40
  -1   1   4   20.10    3.30
  -1   1   4   20.50    2.80
   1   1  -4   20.10    2.40
  -1   1   4   18.60    2.80
   1   1  -4   18.80    2.20
   1   1  -4   20.00    3.00
  -1   1   4   22.80    2.90
  -1   1   4   16.70    3.00
   1  -1   4 1831.82   49.40
  -1  -1  -4 1831.02   49.40
   1  -1   4 1792.62   48.00
  -1  -1  -4 1813.22   49.20
  -1  -1  -4 1814.12   49.30
  -1  -1  -4 1839.92   49.20
   1   1   4 1838.22   49.30
  -1   1  -4 1832.52   48.30
  -1   1  -4 1888.61   48.40
   1   1   4 1814.52   49.20
   1   1   4 1824.02   49.60
   1   1   4 1819.52   49.30
  -1   1  -4 1760.22   48.80
   1   1   4 1868.21   49.50
  -3  -1  -4  924.71   26.50
  -3  -1  -4  931.81   26.50
  -3  -1  -4  927.71   26.30
   3  -1   4  927.61   26.10
  -3  -1  -4  926.01   26.40
   3  -1   4  917.81   26.50
  -3   1  -4  934.51   25.20
   3   1   4  955.30   26.80
   3   1   4  941.11   26.50
   3   1   4  951.90   26.40
   3   1   4  943.91   26.70
  -3   1  -4  934.21   25.20
  -3   1  -4  920.71   26.40
  -3   1  -4  937.81   25.40
   3   1   4  931.61   26.50
  -3   1  -4  925.91   26.00
  -5  -1  -4  749.73   22.00
  -5  -1  -4  749.42   21.80
  -5  -1  -4  743.13   21.80
  -5  -1  -4  748.43   22.10
  -5  -1  -4  750.62   22.00
   5   1   4  750.72   22.20
   5   1   4  739.43   21.70
   5   1   4  737.23   21.90
  -5   1  -4  748.83   20.60
   5   1   4  751.92   21.90
   5   1   4  745.33   22.20
  -5   1  -4  745.03   20.50
  -5   1  -4  725.03   20.50
  -5   1  -4  762.22   21.40
  -5   1  -4  728.23   21.70
  -5   1  -4  743.23   20.70
  -7  -1  -4  216.18    8.90
  -7  -1  -4  221.88    8.70
  -7  -1  -4  218.38    8.70
  -7  -1  -4  216.18    8.90
  -7  -1  -4  204.98    8.50
   7   1   4  224.18    9.10
  -7   1  -4  211.68    7.30
  -7   1  -4  207.38    7.80
  -7   1  -4  211.08    7.40
  -7   1  -4  214.98    7.40
   7   1   4  223.38    8.70
   7   1   4  214.98    8.60
  -7   1  -4  214.88    7.60
   7   1   4  220.68    8.50
  -7   1  -4  216.78    8.10
   7   1   4  219.78    9.10
  -9  -1  -4  531.45   17.20
  -9  -1  -4  518.85   16.90
  -9  -1  -4  524.05   17.40
  -9  -1  -4  528.85   17.00
  -9  -1  -4  524.35   17.00
  -9   1  -4  517.95   15.80
   9   1   4  526.55   17.00
  -9   1  -4  522.95   15.80
   9   1   4  538.65   17.50
  -9   1  -4  528.35   16.40
  -9   1  -4  529.85   16.00
   9   1   4  535.15   17.40
  -9   1  -4  532.95   15.70
   9   1   4  520.65   16.70
 -11  -1  -4   49.10    5.30
 -11  -1  -4   53.89    5.40
  11  -1   4   48.20    3.40
 -11  -1  -4   61.49    5.50
  11  -1   4   45.50    3.30
 -11  -1  -4   48.90    5.50
 -11  -1  -4   74.39    9.30
 -11   1  -4   44.10    4.20
  11   1   4   48.40    4.90
 -11   1  -4   54.09    4.80
 -11   1  -4   48.20    4.50
 -11   1  -4   42.10    4.30
  11   1   4   54.99    5.80
  11   1   4   54.29    5.90
 -11   1  -4   42.10    4.30
  11   1   4   53.89    5.40
 -13  -1  -4   60.59    5.90
 -13  -1  -4   62.39    6.20
 -13  -1  -4   72.49    7.30
 -13  -1  -4   66.09    6.30
 -13  -1  -4   57.19    6.10
  13  -1   4   63.29    4.50
  13  -1   4   70.29    4.10
 -13   1  -4   68.59    5.70
 -13   1  -4   57.29    5.30
  13   1   4   72.39    6.50
  13   1   4   63.79    5.50
  13   1   4   60.29    6.20
  13   1   4   61.79    5.40
 -13   1  -4   68.59    5.20
 -13   1  -4   72.09    5.40
  13   1   4   66.69    6.80
 -15  -1  -4   22.40    5.10
 -15  -1  -4   22.00    5.60
 -15  -1  -4   21.20    5.30
  15  -1   4   19.30    2.90
 -15  -1  -4   24.00    5.30
 -15   1  -4   26.20    4.30
 -15   1  -4   21.40    4.30
  15   1   4   29.90    5.20
 -15   1  -4   19.20    4.20
 -15   1  -4   22.90    4.20
 -15   1  -4   19.00    4.20
  15   1   4   20.60    4.70
 -17  -1  -4   33.50    5.60
 -17  -1  -4   39.80    6.00
 -17  -1  -4   37.50    6.20
 -17  -1  -4   27.80    5.50
 -17   1  -4   29.20    5.20
  17   1   4   38.30    5.90
 -17   1  -4   33.10    4.80
 -17   1  -4   40.50    5.40
 -17   1  -4   36.40    5.30
 -19  -1  -4   98.19    8.70
 -19  -1  -4   79.39    8.60
 -19  -1  -4  106.29   14.00
 -19   1  -4   98.69    7.90
 -19   1  -4   99.99    7.60
 -19   1  -4  101.69    7.80
 -19   1  -4  102.39    7.70
 -21  -1  -4   57.49    8.40
 -21  -1  -4   50.79    7.50
 -21  -1  -4   55.59    8.00
 -21   1  -4   52.79    7.30
 -21   1  -4   51.39    6.50
 -21   1  -4   53.39    7.00
 -21   1  -4   50.59    7.00
 -23  -1  -4   22.40    6.90
 -23  -1  -4   15.20    6.80
 -23   1  -4   38.00    6.50
 -23   1  -4   34.10    7.80
 -23   1  -4   28.20    7.60
 -23   1  -4   28.10    5.90
 -25  -1  -4    5.80    6.10
 -25  -1  -4    5.30    5.60
 -25   1  -4   10.40    5.70
 -25   1  -4    1.60    5.80
 -27  -1  -4   58.49    9.40
 -27  -1  -4   67.19    9.00
 -27   1  -4   56.59    8.40
 -27   1  -4   69.29    8.50
 -29  -1  -4  110.49   10.90
 -29  -1  -4  101.49   10.70
 -29   1  -4  107.49   10.50
 -29   1  -4   90.29   10.00
 -32  -2   4    4.10    6.00
 -32  -2   4   13.20    7.40
 -32   2   4   15.40    8.30
 -30  -2   4    5.90    6.30
 -30  -2   4   19.40    7.20
 -30   2   4    4.90    6.50
 -30   2   4    8.70    6.20
 -28  -2   4   -0.50    5.70
 -28  -2   4    7.80    6.10
 -28   2   4    4.00    5.50
 -28   2   4    7.20    5.90
 -26  -2   4    3.20    5.60
 -26  -2   4   16.10    6.20
 -26   2   4   12.50    5.60
 -26   2   4    6.50    5.10
 -26   2   4   11.40    5.70
 -24  -2   4   13.50    5.90
 -24  -2   4   14.10    5.60
 -24   2   4   11.70    5.30
 -24   2   4    6.70    4.90
 -24   2   4    7.40    4.90
 -24   2   4    4.80    4.50
 -22  -2   4    2.70    4.90
 -22  -2   4   -1.90    3.20
 -22  -2   4    2.20    4.20
 -22   2   4    2.00    4.70
 -22   2   4    6.40    4.70
 -20  -2   4   19.70    4.00
 -20  -2   4   20.20    5.20
 -20  -2   4   17.60    5.70
 -20   2   4   22.80    4.80
 -20   2   4   27.30    5.40
 -18  -2   4   20.30    4.40
 -18  -2   4   15.30    5.10
 -18  -2   4   27.60    5.70
 -18   2   4   25.50    4.70
  18   2  -4   17.90    4.80
 -18   2   4   19.00    4.40
  16  -2  -4    8.10    2.80
  16  -2  -4   13.60    2.60
 -16  -2   4    9.70    4.50
  16  -2  -4   12.40    3.30
 -16  -2   4    7.00    4.10
 -16  -2   4    7.90    3.50
 -16  -2   4   13.30    4.20
  16   2  -4    4.50    3.80
 -16   2   4    8.90    3.80
 -16   2   4    7.40    3.70
  16   2  -4    9.10    4.20
  14  -2  -4   -0.40    1.80
  14  -2  -4    1.70    2.50
 -14  -2   4   -7.60    3.20
 -14  -2   4   -5.60    3.30
 -14  -2   4    2.30    3.10
  14  -2  -4    0.10    2.10
  14  -2  -4   -3.50    1.80
 -14  -2   4   -2.30    3.00
  14   2  -4   -4.20    3.30
  14   2  -4   -6.20    3.30
 -14   2   4    3.40    3.60
 -14   2   4    3.20    3.10
 -12  -2   4   26.60    4.10
 -12  -2   4   26.40    4.10
 -12  -2   4   23.50    4.00
 -12  -2   4   28.40    4.40
  12  -2  -4   26.50    3.00
 -12  -2   4   24.10    3.90
  12  -2  -4   24.40    3.20
 -12  -2   4   40.00    4.60
  12  -2  -4   18.90    2.90
  12  -2  -4   25.30    2.80
  12   2  -4   17.30    3.60
  12   2  -4   20.80    4.00
  12   2  -4   25.90    4.40
 -12   2   4   18.70    3.40
 -12   2   4   20.00    3.60
  10  -2  -4   65.79    3.80
  10  -2  -4   70.69    4.00
 -10  -2   4   77.59    5.10
 -10  -2   4   67.19    5.70
  10  -2  -4   68.99    4.00
 -10  -2   4   68.69    5.50
  10  -2  -4   66.69    5.70
 -10  -2   4   68.49    6.90
 -10  -2   4   61.69    5.40
  10   2  -4   70.89    5.50
  10   2  -4   66.69    5.50
 -10   2   4   77.79    5.00
 -10   2   4   73.89    5.20
  10   2  -4   56.49    5.10
  -8  -2   4   98.39    5.80
   8  -2  -4   94.09    5.80
  -8  -2   4  102.49    5.50
   8  -2  -4   96.59    4.60
  -8  -2   4   97.29    5.90
  -8  -2   4  111.99    5.80
  -8  -2   4  105.09    5.40
  -8  -2   4  104.19    5.60
   8  -2  -4   93.79    4.60
  -8  -2   4   94.19    5.50
   8  -2  -4   87.29    4.20
   8   2  -4  104.59    5.80
  -8   2   4   88.99    6.50
  -8   2   4   92.49    5.50
   8   2  -4  100.29    5.60
   8   2  -4   89.89    5.70
  -8   2   4   90.99    5.30
  -6  -2   4   54.89    3.80
   6  -2  -4   49.99    4.80
  -6  -2   4   51.89    4.00
   6  -2  -4   38.90    3.30
  -6  -2   4   57.79    5.00
  -6  -2   4   54.19    4.40
   6  -2  -4   54.49    4.00
  -6  -2   4   52.29    4.70
   6  -2  -4   49.60    3.60
   6  -2  -4   48.80    3.30
   6  -2  -4   46.70    3.50
   6   2  -4   51.09    4.20
   6   2  -4   51.09    4.20
  -6   2   4   51.89    5.50
   6   2  -4   47.50    4.40
  -6   2   4   49.60    4.30
  -6   2   4   48.10    4.20
   4  -2  -4 1400.76   37.10
   4  -2  -4 1391.36   37.60
  -4  -2   4 1404.16   38.20
   4  -2  -4 1417.56   37.50
   4  -2  -4 1391.06   37.40
  -4  -2   4 1341.17   37.10
  -4  -2   4 1317.97   37.10
   4  -2  -4 1379.86   37.80
  -4  -2   4 1328.27   37.20
  -4  -2   4 1377.46   38.60
  -4   2   4 1374.06   38.10
   4   2  -4 1343.07   37.50
   4   2  -4 1356.86   37.70
  -4   2   4 1419.06   37.90
  -4   2   4 1364.16   38.80
   4   2  -4 1353.26   37.20
  -4   2   4 1392.56   37.70
  -4   2   4 1345.57   37.80
  -2  -2   4   -0.10    2.60
  -2  -2   4    2.00    1.40
  -2  -2   4   -0.20    2.60
   2  -2  -4   -4.80    2.30
  -2  -2   4    2.70    1.30
   2  -2  -4   -1.00    2.40
  -2   2   4   -3.40    2.50
  -2   2   4    0.20    2.20
  -2   2   4    0.60    2.20
  -2   2   4   -2.80    2.70
  -2   2   4    2.40    3.30
   2   2  -4    0.40    2.00
   2   2  -4    1.10    1.90
   2   2  -4   -7.20    2.20
   0  -2  -4 3086.09   79.59
   0  -2  -4 2986.20   80.29
   0  -2  -4 2967.70   79.59
   0  -2   4 2987.80   80.39
   0  -2  -4 2968.50   79.79
   0  -2  -4 2928.01   80.39
   0  -2   4 2958.60   79.69
   0   2  -4 2948.00   78.59
   0   2   4 2967.20   79.59
   0   2   4 2992.60   80.19
   0   2   4 2964.20   80.39
   0   2  -4 2953.20   78.49
   0   2   4 3018.20   79.89
   0   2  -4 3008.50   78.29
   0   2   4 2971.30   79.79
   2  -2   4   15.10    3.60
  -2  -2  -4   14.70    3.00
  -2  -2  -4    9.50    2.70
  -2  -2  -4   11.30    3.30
  -2  -2  -4   18.20    3.30
   2  -2   4   16.90    3.40
   2   2   4   15.90    3.50
  -2   2  -4   16.70    1.70
   2   2   4   13.90    3.30
   2   2   4   10.00    3.10
   2   2   4   19.10    4.20
  -2   2  -4   15.40    2.40
   2   2   4   13.40    3.40
   4  -2   4   94.99    5.70
  -4  -2  -4   97.39    5.80
  -4  -2  -4  106.59    5.70
   4  -2   4   96.39    6.30
  -4  -2  -4   93.19    5.70
  -4  -2  -4   97.69    5.90
  -4  -2  -4   99.49    5.90
   4   2   4   95.19    6.60
   4   2   4   96.19    6.20
   4   2   4   92.79    6.40
   4   2   4   94.39    5.70
   4   2   4   96.79    5.80
  -6  -2  -4  325.17   11.90
   6  -2   4  331.67   11.60
   6  -2   4  332.07   12.30
  -6  -2  -4  331.07   12.20
  -6  -2  -4  339.27   11.90
  -6  -2  -4  311.57   12.00
  -6  -2  -4  308.67   12.90
   6   2   4  328.17   12.20
   6   2   4  314.67   12.40
   6   2   4  322.67   12.60
   6   2   4  335.27   11.80
   6   2   4  338.27   12.20
  -8  -2  -4   57.99    5.20
   8  -2   4   68.79    5.20
   8  -2   4   60.49    5.90
  -8  -2  -4   64.69    5.40
  -8  -2  -4   67.09    5.60
  -8  -2  -4   58.69    5.60
  -8  -2  -4   67.79    5.90
   8   2   4   71.29    5.60
   8   2   4   68.89    6.00
   8   2   4   67.09    6.20
   8   2   4   66.39    5.80
   8   2   4   63.89    6.30
  -8   2  -4   63.39    3.30
 -10  -2  -4 1188.38   35.90
 -10  -2  -4 1214.58   35.30
 -10  -2  -4 1194.98   35.50
 -10  -2  -4 1162.98   35.20
  10   2   4 1233.48   39.40
  10   2   4 1194.48   35.90
  10   2   4 1198.38   35.50
 -10   2  -4 1184.08   32.70
 -10   2  -4 1193.98   32.70
  10   2   4 1175.78   35.40
  10   2   4 1253.97   36.30
 -12  -2  -4   62.69    6.20
 -12  -2  -4   62.69    6.80
 -12  -2  -4   60.39    6.50
  12   2   4   64.89    7.10
  12   2   4   61.29    6.90
  12   2   4   60.49    9.10
  12   2   4   51.79    6.60
 -12   2  -4   56.69    4.50
 -12   2  -4   59.09    4.50
  12   2   4   71.29    8.70
 -12   2  -4   58.99    4.30
 -14  -2  -4  260.17   12.40
 -14  -2  -4  238.08   12.00
 -14   2  -4  261.07    9.80
 -14   2  -4  239.68    9.40
 -14   2  -4  261.07    9.80
  14   2   4  253.47   12.70
  14   2   4  281.67   12.90
  14   2   4  252.67   12.20
 -14   2  -4  266.27    9.60
 -16  -2  -4    5.60    4.80
 -16  -2  -4    4.80    4.60
  16   2   4   -2.70    4.50
  16   2   4    5.00    4.50
 -16   2  -4    0.10    3.00
 -16   2  -4   -2.50    2.80
  16   2   4    7.40    5.10
 -16   2  -4    0.10    3.40
 -16   2  -4    3.50    3.40
 -18  -2  -4   12.00    5.20
 -18  -2  -4    8.30    5.00
 -18   2  -4    7.30    3.70
  18   2   4    5.00    4.70
  18   2   4    5.20    5.00
 -18   2  -4    4.80    3.70
 -18   2  -4    7.60    3.90
 -18   2  -4    2.50    3.90
  18   2   4    4.80    5.40
 -20  -2  -4    5.60    4.80
 -20  -2  -4    3.20    4.90
 -20   2  -4    3.20    4.40
 -20   2  -4    1.30    4.20
 -20   2  -4    4.10    4.00
 -20   2  -4   18.20    4.40
 -22  -2  -4   -0.30    5.70
 -22  -2  -4    0.10    5.50
 -22   2  -4   12.60    4.90
 -22   2  -4    7.10    4.70
 -22   2  -4    3.80    4.50
 -22   2  -4    3.30    4.80
 -24  -2  -4    1.60    5.60
 -24  -2  -4    0.00    6.00
 -24   2  -4   -6.40    4.40
 -24   2  -4    7.20    4.80
 -24   2  -4    2.60    4.90
 -26  -2  -4   10.70    6.90
 -26  -2  -4    2.60    6.30
 -26   2  -4    3.30    5.40
 -26   2  -4   -7.20    4.90
 -28  -2  -4   12.20    7.10
 -28  -2  -4   14.00    5.20
 -28  -2  -4    6.20    6.70
 -28   2  -4   11.40    5.10
 -29  -3   4   21.40    9.00
 -29  -3   4   10.70    6.40
 -29   3   4   15.70    5.60
 -29   3   4   15.50    8.50
 -27  -3   4   -0.30    6.80
 -27  -3   4   10.80    4.50
 -27  -3   4   12.80    6.80
 -27   3   4   -2.70    4.60
 -27   3   4   20.60    5.80
 -25  -3   4   16.30    5.10
 -25  -3   4   14.20    6.00
 -25  -3   4   10.30    6.30
 -25   3   4   31.00    6.10
 -25   3   4   13.60    5.40
 -25   3   4   24.30    6.00
 -23  -3   4   52.39    7.50
 -23  -3   4   53.39    6.80
 -23  -3   4   42.60    7.60
 -23   3   4   41.20    7.70
 -23   3   4   49.60    6.70
 -21  -3   4   -3.20    4.10
 -21  -3   4    0.90    5.50
 -21  -3   4    1.00    4.20
 -21   3   4    2.00    4.50
 -21   3   4    4.20    4.20
 -19  -3   4   21.40    5.80
 -19  -3   4   21.20    5.10
  19  -3  -4   30.10    4.60
 -19  -3   4   29.40    5.50
 -19   3   4   19.90    5.10
 -19   3   4   23.60    4.70
 -17  -3   4    3.40    4.40
 -17  -3   4    0.40    4.00
  17  -3  -4    1.20    3.60
 -17  -3   4    4.90    4.50
 -17   3   4    6.00    4.00
 -17   3   4    8.90    4.00
  17   3  -4    3.80    5.10
 -15  -3   4   57.49    6.40
  15  -3  -4   56.39    6.40
 -15  -3   4   50.49    6.80
 -15  -3   4   49.40    6.60
 -15   3   4   50.69    5.50
  15   3  -4   52.79    7.90
  15   3  -4   43.60    5.90
 -15   3   4   56.69    6.00
  15   3  -4   50.29    7.00
 -13  -3   4   29.60    5.90
 -13  -3   4   35.50    5.10
 -13  -3   4   28.80    4.90
 -13  -3   4   31.40    5.60
  13  -3  -4   28.70    4.90
 -13  -3   4   28.50    5.80
  13   3  -4   23.50    4.80
 -13   3   4   25.80    4.10
  13   3  -4   31.80    5.10
  13   3  -4   33.90    6.90
 -13   3   4   30.30    6.00
 -13   3   4   36.60    4.40
 -11  -3   4   21.20    4.20
 -11  -3   4   23.20    4.10
 -11  -3   4   27.10    4.90
 -11  -3   4   23.30    5.10
  11  -3  -4   22.60    3.40
  11  -3  -4   13.40    4.40
 -11  -3   4   23.60    5.10
  11   3  -4   28.70    4.90
 -11   3   4   13.20    3.70
  11   3  -4   26.20    4.60
 -11   3   4   23.30    3.90
  11   3  -4   30.70    5.10
 -11   3   4   22.90    5.50
  -9  -3   4   63.99    6.50
  -9  -3   4   76.29    5.70
   9  -3  -4   63.39    6.60
   9  -3  -4   75.59    4.90
  -9  -3   4   76.99    5.70
  -9  -3   4   73.99    7.20
  -9  -3   4   65.59    5.60
   9   3  -4   67.59    5.90
  -9   3   4   59.49    5.60
  -9   3   4   70.99    7.20
   9   3  -4   81.69    6.30
  -9   3   4   75.29    5.70
   9   3  -4   86.69    6.60
  -7  -3   4   67.99    6.00
  -7  -3   4   60.59    6.20
  -7  -3   4   69.19    4.90
   7  -3  -4   69.19    6.50
  -7  -3   4   70.69    5.00
   7  -3  -4   58.69    3.60
   7  -3  -4   68.09    4.90
  -7  -3   4   59.89    4.30
   7  -3  -4   60.79    3.50
  -7  -3   4   59.99    6.70
   7   3  -4   58.39    5.20
  -7   3   4   68.19    7.00
   7   3  -4   56.59    5.40
  -7   3   4   53.09    5.20
   7   3  -4   63.29    5.90
  -7   3   4   60.19    5.40
   5  -3  -4   98.39    5.20
   5  -3  -4  113.69    6.00
  -5  -3   4  114.39    5.50
  -5  -3   4  110.69    5.10
   5  -3  -4  108.79    5.40
  -5  -3   4  113.79    5.10
  -5  -3   4  125.99    8.10
  -5  -3   4  134.49    6.50
  -5  -3   4  114.19    7.40
   5  -3  -4  117.49    7.90
   5  -3  -4  107.79    5.20
   5   3  -4  114.69    6.60
   5   3  -4  127.09    6.20
  -5   3   4  109.39    7.20
  -5   3   4  119.69    8.40
   5   3  -4  114.59    6.40
  -5   3   4  101.49    6.80
   3  -3  -4   82.59    4.80
  -3  -3   4   99.59    6.80
   3  -3  -4   84.49    5.20
   3  -3  -4   92.59    7.40
   3  -3  -4   74.09    4.90
  -3  -3   4   88.29    7.40
   3  -3  -4   83.59    5.70
  -3   3   4   94.59    7.50
   3   3  -4   81.89    5.10
   3   3  -4   84.19    5.60
  -3   3   4   85.09    5.80
  -3   3   4   78.79    5.50
   3   3  -4  104.49    9.00
  -3   3   4   83.59    6.40
  -3   3   4   93.49    6.60
   1  -3  -4  548.35   16.70
   1  -3  -4  554.14   17.20
   1  -3  -4  531.15   18.70
  -1  -3   4  539.55   18.00
   1  -3  -4  504.55   16.50
   1  -3  -4  549.85   16.90
  -1  -3   4  571.24   19.10
  -1   3   4  538.65   18.00
  -1   3   4  551.24   17.30
   1   3  -4  536.95   16.90
   1   3  -4  531.55   16.10
   1   3  -4  536.15   16.40
  -1   3   4  552.44   18.90
  -1   3   4  554.24   17.70
  -1   3   4  537.45   17.50
  -1  -3  -4    3.80    2.90
   1  -3   4    4.20    3.80
   1  -3   4   10.30    4.00
  -1  -3  -4    5.80    4.10
  -1  -3  -4    5.80    3.00
   1   3   4   -2.00    2.80
  -1   3  -4    4.10    2.10
   1   3   4    5.50    3.40
   1   3   4    0.20    3.30
   1   3   4   -1.10    4.10
  -1   3  -4    6.20    2.90
   1   3   4   -0.70    2.90
  -3  -3  -4   60.09    5.40
  -3  -3  -4   54.29    5.20
   3  -3   4   61.59    6.10
   3  -3   4   60.59    6.50
  -3   3  -4   54.69    5.10
   3   3   4   58.29    5.70
   3   3   4   57.69    6.00
   3   3   4   55.39    5.60
   3   3   4   72.59    7.40
   3   3   4   53.09    6.20
   5  -3   4    1.80    3.50
  -5  -3  -4    5.10    4.30
  -5  -3  -4    3.20    3.30
   5  -3   4    6.20    4.50
  -5   3  -4    5.70    3.30
   5   3   4    3.10    3.90
   5   3   4    7.30    4.10
   5   3   4    8.40    5.00
   5   3   4    0.90    4.10
   5   3   4    1.40    4.00
   7  -3   4   64.19    6.20
   7  -3   4   61.99    7.10
  -7  -3  -4   58.29    6.10
  -7  -3  -4   64.99    6.60
   7   3   4   55.59    6.20
  -7   3  -4   57.19    5.80
   7   3   4   53.99    6.10
   7   3   4   46.90    5.90
   7   3   4   56.89    7.40
   7   3   4   53.09    6.80
  -9  -3  -4   28.70    5.10
   9  -3   4   18.30    5.20
   9  -3   4   24.70    4.60
  -9  -3  -4   24.50    5.40
   9   3   4   23.30    6.10
   9   3   4   24.50    5.30
   9   3   4   19.10    5.50
   9   3   4   14.30    4.40
   9   3   4   24.80    9.70
 -11  -3  -4  234.38   11.70
 -11  -3  -4  220.88   11.40
  11  -3   4  216.28   11.50
  11   3   4  237.58   12.00
  11   3   4  210.68   12.30
  11   3   4  206.68   12.10
  11   3   4  233.88   12.40
 -13  -3  -4   85.59    8.10
 -13  -3  -4   80.09    8.10
  13   3   4   66.49    8.20
  13   3   4   67.59    8.00
  13   3   4   79.59    9.00
  13   3   4   76.69    9.10
 -15  -3  -4    6.60    5.10
 -15  -3  -4   -6.20    4.30
  15   3   4    1.70    4.90
  15   3   4    5.70    5.40
  15   3   4   -2.00    4.80
 -17  -3  -4   12.20    5.00
 -17  -3  -4   17.00    6.50
 -17   3  -4   14.00    3.60
  17   3   4   13.90    6.00
  17   3   4    9.90    6.00
  17   3   4   10.70    6.10
 -19  -3  -4   64.19    8.60
 -19  -3  -4   56.59    8.40
 -19   3  -4   59.59    5.80
  19   3   4   57.29    9.80
 -19   3  -4   54.09    5.40
  19   3   4   55.29    8.30
 -21  -3  -4   -4.10    5.90
 -21  -3  -4   11.10    6.40
 -21  -3  -4    4.10    5.90
 -21   3  -4    3.20    3.80
 -23  -3  -4   18.30    6.50
 -23  -3  -4   19.50    7.10
 -23  -3  -4   25.60    7.90
 -23   3  -4    7.60    4.80
 -25  -3  -4   -4.00    7.00
 -25  -3  -4    4.50    6.30
 -25  -3  -4   -4.80    5.40
 -25   3  -4    4.80    4.70
 -25   3  -4    1.70    4.40
 -26  -4   4    6.00    5.20
 -26  -4   4   18.60    8.80
 -26  -4   4   12.30    7.30
 -26   4   4   16.10    4.80
 -26   4   4    0.90    8.90
 -24  -4   4   23.30    7.20
 -24  -4   4   36.30    8.80
 -24  -4   4   34.50    6.70
 -24   4   4   41.70    5.70
 -24   4   4   23.10    8.20
 -24   4   4   35.60    5.60
 -22  -4   4   15.70    5.50
 -22  -4   4   10.50    5.10
 -22  -4   4   -2.90    6.10
  22  -4  -4   15.60    4.80
 -22  -4   4    5.00    6.30
 -22   4   4   18.80    4.90
 -22   4   4    5.00    7.00
 -22   4   4    8.30    4.50
  20  -4  -4   76.09    8.10
 -20  -4   4   56.99    7.40
 -20  -4   4   89.09    9.30
 -20  -4   4   53.99    7.20
 -20  -4   4   64.69    9.00
 -20   4   4   86.89    7.10
 -20   4   4   71.19   10.20
 -20   4   4   64.19    8.50
 -18  -4   4   12.80    5.10
 -18  -4   4    2.10    5.40
  18  -4  -4    7.80    4.70
 -18  -4   4    9.40    4.50
 -18  -4   4    4.80    5.60
 -18   4   4    7.40    4.10
 -18   4   4    1.30    4.10
 -18   4   4    1.60    6.40
 -16  -4   4    8.50    4.00
  16  -4  -4    1.90    4.40
 -16  -4   4    4.30    4.00
 -16  -4   4   -9.20    4.30
 -16  -4   4    8.70    6.20
 -16   4   4    8.90    3.90
  16   4  -4  -16.20    5.60
 -16   4   4    3.20    6.10
  16   4  -4   -1.50    5.60
 -16   4   4    7.60    4.10
  14  -4  -4  128.79    9.70
  14  -4  -4  107.49    6.80
 -14  -4   4   87.29    9.10
 -14  -4   4  105.99    7.50
 -14  -4   4  109.89    9.60
 -14  -4   4  117.79   10.00
  14   4  -4  116.99    9.50
 -14   4   4  110.49    7.40
 -14   4   4  112.49   10.20
 -14   4   4  123.09    7.50
  14   4  -4  118.99    9.40
  14   4  -4   90.49    8.80
  12  -4  -4   19.60    5.40
 -12  -4   4   21.20    3.90
  12  -4  -4   12.60    4.00
 -12  -4   4    9.00    3.50
 -12  -4   4   21.40    6.10
 -12  -4   4   15.60    5.50
 -12   4   4   18.40    6.70
 -12   4   4   17.50    4.40
  12   4  -4   23.80    5.30
  12   4  -4   17.50    5.70
 -12   4   4    9.60    4.10
  12   4  -4   20.40    6.00
 -10  -4   4   63.89    7.90
 -10  -4   4   48.00    7.20
  10  -4  -4   53.79    5.70
 -10  -4   4   43.10    8.10
  10  -4  -4   54.29    7.20
  10   4  -4   77.49    7.40
  10   4  -4   49.00    6.30
  10   4  -4   65.09    7.20
 -10   4   4   51.69    5.90
 -10   4   4   54.99    5.80
 -10   4   4   49.60    8.10
  -8  -4   4   -0.80    4.40
  -8  -4   4    0.80    2.30
   8  -4  -4   -4.70    3.50
  -8  -4   4    4.40    2.90
   8  -4  -4    4.10    5.10
   8   4  -4   -6.50    4.00
  -8   4   4    2.10    5.70
   8   4  -4    4.00    3.60
  -8   4   4    0.60    3.70
   8   4  -4    3.40    4.60
  -8   4   4   -1.90    3.80
   6  -4  -4    4.40    3.70
  -6  -4   4   10.40    8.80
   6  -4  -4    4.40    5.00
  -6  -4   4   14.90    5.10
   6   4  -4   16.40    4.10
   6   4  -4    8.30    3.90
  -6   4   4   10.80    5.70
  -6   4   4    5.20    3.90
   6   4  -4   11.10    5.30
  -6   4   4    7.50    4.60
   4  -4  -4    2.00    3.70
  -4  -4   4    8.30    6.00
  -4  -4   4   -0.80    4.30
   4  -4  -4   -0.10    4.70
   4   4  -4    3.50    4.00
   4   4  -4    3.70    3.40
   4   4  -4    1.60    3.20
  -4   4   4    4.80    3.30
  -4   4   4    6.70    3.40
  -4   4   4    2.20    4.10
  -4   4   4   11.00    5.40
  -4   4   4    0.50    3.90
   2  -4  -4   50.79    5.30
   2  -4  -4   67.69    6.80
   2  -4  -4   53.39    7.40
  -2  -4   4   66.59    7.30
  -2  -4   4   57.79    8.80
  -2   4   4   65.89    8.40
  -2   4   4   62.29    6.00
  -2   4   4   60.19    6.60
  -2   4   4   58.99    6.00
  -2   4   4   61.09    6.80
   2   4  -4   63.09    5.10
   2   4  -4   61.09    6.50
   2   4  -4   59.09    5.60
   0  -4   4   28.80    8.60
   0  -4  -4   30.80    4.70
   0  -4   4   15.20    5.40
   0  -4  -4   23.80    5.00
   0  -4  -4   25.20    7.00
   0  -4  -4   24.90    4.60
   0   4   4   25.20    5.30
   0   4  -4   26.40    3.60
   0   4  -4   28.60    5.30
   0   4   4   25.70    5.70
   0   4   4   21.60    4.70
   0   4   4   29.80    6.70
   0   4  -4   21.90    3.70
   0   4   4   32.10    4.70
   2  -4   4   -2.60    4.50
  -2  -4  -4    0.20    2.80
  -2  -4  -4    6.10    3.10
  -2  -4  -4    0.60    4.10
   2   4   4    4.10    4.60
  -2   4  -4    3.00    3.70
   2   4   4   -0.60    5.00
   2   4   4   -0.40    3.60
   2   4   4    6.70    4.20
  -2   4  -4   -0.30    2.40
   2   4   4   -5.20    3.90
   4  -4   4   41.10    6.50
  -4  -4  -4   39.70    5.10
   4  -4   4   42.10    7.90
  -4  -4  -4   40.80    7.60
  -4  -4  -4   46.10    6.30
  -4  -4  -4   50.29    5.40
   4   4   4   32.40    6.50
   4   4   4   53.29    6.70
   4   4   4   32.50    7.20
  -4   4  -4   34.50    8.80
   4   4   4   41.90    6.50
   4   4   4   41.50    6.20
  -6  -4  -4   40.30    7.70
   6  -4   4   50.19    8.40
   6  -4   4   42.30    6.70
  -6  -4  -4   37.20    5.40
   6   4   4   55.39    7.20
   6   4   4   42.70    7.50
   6   4   4   42.60    7.90
   6   4   4   45.80    7.40
  -6   4  -4   52.49    6.30
   6   4   4   31.30    6.30
   8  -4   4   18.30    5.20
  -8  -4  -4    9.90    4.30
  -8  -4  -4    8.10    4.40
   8  -4   4   11.00    5.70
  -8  -4  -4   13.70    6.10
   8   4   4   14.50    5.70
   8   4   4    9.70    5.90
  -8   4  -4   22.70    5.40
   8   4   4    3.90    5.70
   8   4   4   12.30    5.70
   8   4   4   13.90    6.40
 -10  -4  -4   25.60    5.90
  10  -4   4   30.60    5.90
 -10  -4  -4   39.70    6.30
  10  -4   4   23.40    7.00
 -10  -4  -4   24.60    7.20
  10   4   4   24.10    7.00
  10   4   4   32.50    6.60
 -10   4  -4   37.20    6.40
  10   4   4   36.70    7.00
  10   4   4   24.10    6.40
 -12  -4  -4   44.40    7.20
 -12  -4  -4   48.40    9.00
 -12  -4  -4   40.80    7.00
  12  -4   4   39.70    7.70
 -12   4  -4   52.19    7.20
  12   4   4   40.20    8.00
  12   4   4   37.40    7.70
  12   4   4   45.10   12.10
 -14  -4  -4    0.40    4.00
 -14  -4  -4    8.40    5.00
 -14  -4  -4   -8.60    4.70
  14  -4   4   -2.50    4.90
  14   4   4    1.30    5.90
  14   4   4    0.20    5.40
 -14   4  -4    6.30    5.70
  14   4   4   -1.40    6.30
 -16  -4  -4    8.20    5.30
 -16  -4  -4    9.90    5.70
 -16  -4  -4   11.90    6.60
  16   4   4    6.40    5.80
  16   4   4    3.90    5.80
 -16   4  -4   10.10    6.00
  16   4   4   12.40    7.20
 -18  -4  -4    4.30    6.20
 -18  -4  -4    2.10    5.70
 -18  -4  -4   -2.60    6.00
 -18   4  -4   -1.40    6.50
  18   4   4    0.90    5.80
  18   4   4    8.90    7.00
 -20  -4  -4   22.70    8.20
 -20  -4  -4   31.30    7.90
 -20  -4  -4   34.30    7.90
  20   4   4   22.10    8.20
 -20   4  -4   36.40    7.90
 -22  -4  -4   -2.60    6.80
 -22  -4  -4   10.00    6.70
 -19  -5   4   19.60    8.00
 -19  -5   4    5.10    6.50
  19  -5  -4    5.70    6.10
 -19   5   4    4.10    7.20
 -17  -5   4   24.20    8.30
 -17  -5   4   28.40    7.60
  17  -5  -4   29.70    7.80
 -17   5   4   26.70    7.90
  15  -5  -4   32.70    7.20
 -15  -5   4   45.40    9.50
  15   5  -4   37.30    8.10
 -15   5   4   24.40    7.80
 -15   5   4   22.80    4.80
 -13  -5   4    8.80    7.10
  13  -5  -4    8.70    4.20
 -13  -5   4   10.50    7.30
  13  -5  -4   10.80    5.80
 -13   5   4   10.40    4.20
  13   5  -4   13.80    6.10
 -13   5   4    3.10    6.60
  11  -5  -4   -3.10    3.80
  11  -5  -4   -5.90    5.50
 -11  -5   4   12.40    6.80
 -11  -5   4    2.80    6.10
  11   5  -4    8.30    5.70
 -11   5   4   -2.70    6.30
 -11   5   4   11.00    4.80
 -11   5   4    2.10    4.40
   9  -5  -4    0.50    5.40
  -9  -5   4    0.90    5.90
   9  -5  -4    2.40    4.10
  -9  -5   4    0.60    5.80
  -9   5   4    6.90    4.50
   9   5  -4    2.90    5.30
  -9   5   4   -1.40    6.10
   7  -5  -4    4.80    4.50
   7  -5  -4   -2.50    5.90
  -7  -5   4    0.60    5.70
  -7  -5   4    4.90    6.60
  -7   5   4    2.30    4.70
   7   5  -4   20.30    9.30
  -7   5   4  -10.00    5.80
   7   5  -4    1.70    5.20
   5  -5  -4  132.69    8.80
  -5  -5   4  125.19   11.90
  -5  -5   4  149.99   11.30
   5  -5  -4  130.99   11.90
   5   5  -4  114.09    8.40
   5   5  -4  128.99    9.30
   5   5  -4  124.79    8.40
  -5   5   4  132.39    9.50
  -5   5   4  127.89   12.20
   3  -5  -4   10.60    5.00
   3  -5  -4    9.00    5.80
  -3  -5   4    6.60    5.90
  -3  -5   4   14.00    6.20
  -3   5   4   10.90    8.70
  -3   5   4    9.80    5.90
   3   5  -4    9.20    4.30
   3   5  -4   11.20    3.90
  -3   5   4    8.30    5.10
   3   5  -4   13.40    5.50
  -1  -5   4   48.00    9.00
   1  -5  -4   59.59    7.20
   1  -5  -4   45.10    7.90
  -1  -5   4   43.60    7.70
   1   5  -4   53.59    6.20
   1   5  -4   52.19    5.30
  -1   5   4   51.39    7.50
   1   5  -4   54.09    6.60
  -1   5   4   52.99    6.40
  -1   5   4   44.40   10.90
  -1   5   4   60.69    7.20
  -1  -5  -4   11.90    6.60
   1  -5   4   27.90    7.70
  -1  -5  -4   21.30    5.70
   1  -5   4   16.50    6.00
   1   5   4   19.40    6.50
   1   5   4   19.80    6.20
   1   5   4   41.80    6.00
   1   5   4    9.50    6.80
  -1   5  -4   19.60    5.40
  -1   5  -4   29.20    6.00
   3  -5   4    3.10    5.80
   3  -5   4   17.30    6.40
  -3  -5  -4   19.30    5.80
  -3  -5  -4    9.00    7.40
   3   5   4   13.10    6.60
  -3   5  -4   19.10    5.40
   3   5   4   12.10    5.40
   3   5   4   14.90    6.20
  -5  -5  -4   30.60    6.70
   5  -5   4   33.00    6.70
  -5  -5  -4   27.50    8.70
   5  -5   4   27.50    9.00
   5   5   4   34.20    7.20
   5   5   4   23.50    7.60
  -5   5  -4   30.70    6.10
   5   5   4   29.50    7.90
   7  -5   4   -7.50    6.60
   7  -5   4    1.30    5.30
  -7  -5  -4    1.50    6.00
  -7  -5  -4    2.00    5.40
   7   5   4   -3.10    5.10
   7   5   4   12.30    6.50
   7   5   4   -2.00    5.80
  -7   5  -4   10.50    5.50
  -9  -5  -4   -3.30    5.50
  -9  -5  -4    3.40    6.40
   9  -5   4   14.80    6.50
   9  -5   4   13.80    5.80
   9   5   4    4.90    6.00
   9   5   4    4.40    6.60
   9   5   4   10.30    6.30
  -9   5  -4   -2.60    5.20
  11  -5   4   46.60    9.00
 -11  -5  -4   52.49    9.80
  11  -5   4   59.79    8.60
 -11  -5  -4   46.40    8.10
  11   5   4   50.29    8.80
  11   5   4   58.19    8.70
  11   5   4   54.89    9.20
 -11   5  -4   43.20    7.30
  13  -5   4   36.30    9.00
 -13  -5  -4   41.00    8.40
 -13  -5  -4   36.30    8.00
  13   5   4   29.90    8.00
  13   5   4   39.70    8.50
  13   5   4   26.80    7.00
 -15  -5  -4   33.10    9.90
 -15   5  -4   39.50    7.80
  15   5   4   17.60    7.40
  15   5   4   22.40    8.40
   8  -6  -4   36.70    7.00
  -8  -6   4   39.20    8.90
   6  -6  -4   11.60    7.60
   6  -6  -4    2.40    5.50
  -6  -6   4   12.00    7.80
  -6  -6   4    7.40    5.80
  -6   6   4    1.10    6.40
   6   6  -4   23.90    7.20
  -6   6   4    9.10    4.30
  -6   6   4   17.60    9.60
   4  -6  -4   48.90   10.40
  -4  -6   4   54.39   10.70
   4  -6  -4   54.49    9.70
  -4  -6   4   58.39    9.10
  -4   6   4   62.99   10.30
   4   6  -4   37.40    7.80
  -4   6   4   52.79    6.70
  -4   6   4   71.89   10.80
   2  -6  -4   -8.50    7.50
  -2  -6   4    6.50    8.10
  -2  -6   4   13.10    6.60
  -2   6   4   11.30    7.30
  -2   6   4   -1.80    6.60
   2   6  -4   -8.20    6.20
  -2   6   4    4.90    5.70
   0  -6  -4    6.00    5.60
   0  -6   4    9.50    6.90
   0  -6   4    0.50    7.40
   0  -6  -4    2.50    6.50
   0   6  -4   -4.10    6.60
   0   6   4    8.70    6.40
   0   6   4    4.10    7.30
  -2  -6  -4    4.20    7.50
   2  -6   4   -0.40    6.30
  -2  -6  -4   -0.90    5.00
   2  -6   4   15.70    8.90
  -2   6  -4    7.90    7.00
   2   6   4   -0.70    5.90
   2   6   4   11.90    6.70
   2   6   4  -17.60   11.00
  -4  -6  -4    1.00    5.80
   4  -6   4    7.10    5.60
   4   6   4    0.70    6.00
 -34   0   5    0.30    6.90
 -32   0   5   -0.40    6.30
 -32   0   5   12.40    7.20
 -30   0   5   -4.90    5.00
 -30   0   5    2.40    6.00
 -28   0   5    7.20    5.90
 -28   0   5   19.10    7.90
 -26   0   5  -11.20    5.40
 -26   0   5    0.40    5.20
 -26   0   5   16.10    5.60
 -24   0   5    7.70    5.20
 -24   0   5    5.50    4.50
 -24   0   5    1.70    4.80
 -22   0   5   -7.10    4.30
 -22   0   5   10.40    4.70
 -22   0   5   -2.50    4.40
 -22   0   5   -3.50    3.90
 -20   0   5   -7.40    3.80
 -20   0   5    0.10    4.10
 -20   0   5   -4.90    3.50
 -18   0   5    6.10    4.10
 -18   0   5    0.80    3.80
  18   0  -5   -1.30    3.20
 -16   0   5   -4.00    3.30
 -16   0   5    5.00    3.60
  16   0  -5   -1.20    2.70
  14   0  -5    1.40    2.40
 -14   0   5    0.20    2.90
 -14   0   5    4.80    3.10
  14   0  -5   -3.10    2.30
  12   0  -5   -1.80    2.10
 -12   0   5    2.00    3.00
 -12   0   5    0.70    2.60
  10   0  -5   -1.60    2.10
 -10   0   5    0.50    2.80
  10   0  -5    0.10    2.20
 -10   0   5    1.30    2.50
   8   0  -5    0.80    1.50
  -8   0   5   -4.10    2.20
  -8   0   5    2.90    2.60
   8   0  -5    1.60    2.10
   6   0  -5   -0.70    2.20
  -6   0   5    2.00    2.40
  -6   0   5    0.70    2.30
   6   0  -5    1.10    2.00
   4   0  -5    2.30    2.10
  -4   0   5    4.10    2.40
   4   0  -5    1.30    1.40
  -4   0   5   -1.80    1.40
   4   0  -5   -2.90    2.10
  -4   0   5   -0.10    2.20
   2   0  -5    1.00    1.60
   2   0  -5   -1.30    2.20
   2   0  -5    0.80    2.10
  -2   0   5    0.60    2.10
  -2   0   5    0.90    1.80
  -2   0   5   -0.50    2.40
   0   0  -5   -2.00    1.70
   0   0   5    0.20    2.10
   0   0   5    0.90    1.90
   0   0  -5   -1.00    1.90
   0   0   5    0.30    2.00
   0   0  -5    0.10    1.60
   0   0  -5   -1.30    2.10
   0   0  -5    1.00    2.20
   0   0  -5    1.60    2.20
  -2   0  -5   -0.70    2.00
  -2   0  -5    1.40    2.10
  -2   0  -5    0.70    2.30
   2   0   5   -0.20    2.10
  -2   0  -5    3.30    2.20
  -2   0  -5   -0.90    2.00
   2   0   5   -1.80    2.00
   2   0   5    0.30    2.20
  -4   0  -5    0.00    2.10
  -4   0  -5    0.60    2.20
   4   0   5    2.10    2.20
  -4   0  -5    1.20    2.20
   4   0   5   -0.80    1.80
   4   0   5    0.60    2.20
   4   0   5   -0.20    2.30
  -4   0  -5    0.90    2.30
  -4   0  -5   -0.70    2.10
   4   0   5    0.90    2.00
  -6   0  -5   -2.00    2.30
  -6   0  -5   -0.60    2.40
  -6   0  -5   -0.70    2.30
   6   0   5   -5.10    2.30
   6   0   5   -2.50    1.80
   6   0   5   -3.20    2.00
   6   0   5    1.70    2.00
  -6   0  -5    0.00    2.20
   6   0   5   -0.20    2.20
  -6   0  -5   -1.90    2.40
   8   0   5   -1.70    2.70
  -8   0  -5   -3.30    2.30
   8   0   5    0.30    2.20
   8   0   5   -1.60    2.40
   8   0   5   -2.60    1.90
  -8   0  -5    0.90    2.30
  -8   0  -5    1.30    2.30
   8   0   5   -0.40    1.90
  -8   0  -5   -1.10    2.30
  -8   0  -5   -0.30    2.30
 -10   0  -5    1.80    2.60
 -10   0  -5   -2.30    2.50
  10   0   5   -1.40    2.40
  10   0   5    0.70    1.90
 -10   0  -5   -0.40    2.80
  10   0   5   -0.20    2.00
 -10   0  -5    3.40    2.80
 -10   0  -5   -0.60    2.60
  10   0   5    1.20    2.50
  12   0   5    1.40    2.70
 -12   0  -5   -1.60    3.00
  12   0   5    5.20    2.50
  12   0   5    1.70    2.40
 -12   0  -5   -3.10    2.70
 -12   0  -5    3.40    3.20
  12   0   5    0.70    2.90
 -12   0  -5    4.10    3.00
 -14   0  -5   -4.60    3.20
  14   0   5   -7.30    2.60
 -14   0  -5    7.90    3.70
  14   0   5   -2.50    3.10
 -14   0  -5    2.00    3.40
 -14   0  -5    1.80    3.30
 -14   0  -5   -3.50    2.90
 -16   0  -5    4.70    6.60
 -16   0  -5   -5.10    3.50
 -16   0  -5   15.70    7.30
 -16   0  -5    0.40    3.90
 -18   0  -5    3.50    4.00
 -18   0  -5   -1.40    3.90
 -18   0  -5   -2.40    3.70
 -18   0  -5   -3.30    4.00
 -20   0  -5    7.30    4.90
 -20   0  -5    4.40    5.10
 -20   0  -5   -1.70    4.60
 -20   0  -5    4.80    5.20
 -22   0  -5   -1.30    4.90
 -22   0  -5    0.30    6.50
 -22   0  -5   -8.10    4.30
 -24   0  -5   -7.20    5.50
 -24   0  -5   -5.90    5.20
 -26   0  -5   -0.30    5.60
 -26   0  -5   11.60    6.70
 -28   0  -5    1.70    5.70
 -28   0  -5    2.80    6.20
 -30   0  -5    4.20    6.60
 -33  -1   5   -3.90    6.00
 -33  -1   5    0.10    5.60
 -33   1   5    5.60    6.80
 -33   1   5   -0.60    6.20
 -31  -1   5   42.80    8.00
 -31  -1   5   33.00    7.40
 -31   1   5   36.60    7.90
 -31   1   5   36.00    7.20
 -29  -1   5    5.70    5.90
 -29  -1   5    6.20    6.00
 -29   1   5   -1.30    5.90
 -29   1   5   17.10    6.50
 -27  -1   5   29.70    7.20
 -27  -1   5   24.30    6.50
 -27   1   5   24.80    8.30
 -27   1   5   12.30    7.30
 -25  -1   5   89.09    9.20
 -25  -1   5   88.99    9.00
 -25   1   5  112.99    9.80
 -25   1   5   85.99    8.50
 -25   1   5   80.59    9.00
 -25   1   5   87.09    9.00
 -23  -1   5   16.20    5.90
 -23  -1   5   16.70    5.60
 -23   1   5    7.20    5.20
 -23   1   5    6.80    4.90
 -21  -1   5  180.38   10.50
 -21  -1   5  193.48   11.10
 -21  -1   5  196.98   10.80
 -21   1   5  208.38   11.00
 -21   1   5  207.78   10.60
 -19   1   5   -9.80    3.60
 -19   1   5   -6.10    3.60
 -17  -1   5  703.03   23.30
 -17  -1   5  735.53   23.70
 -17  -1   5  739.73   24.20
 -17  -1   5  690.83   23.70
 -17  -1   5  691.63   23.60
 -17   1   5  860.51   23.60
  17   1  -5  678.53   23.20
 -17   1   5  857.71   24.00
 -15  -1   5   64.69    6.40
  15  -1  -5   78.69    5.10
  15  -1  -5   72.59    4.90
 -15  -1   5   64.59    5.80
 -15  -1   5   67.19    6.20
 -15  -1   5   70.19    5.80
 -15  -1   5   70.79    7.60
 -15   1   5   78.79    6.10
 -15   1   5   84.79    6.00
  15   1  -5   70.99    5.40
  15   1  -5   62.79    5.80
  13  -1  -5   24.40    3.20
  13  -1  -5   23.60    3.30
 -13  -1   5   27.10    4.40
 -13  -1   5   23.00    2.60
 -13  -1   5   19.20    3.80
 -13  -1   5   20.80    3.70
 -13   1   5   21.70    4.00
  13   1  -5   22.90    5.70
  13   1  -5   16.90    3.60
 -13   1   5   19.80    3.70
 -11  -1   5  117.29    5.20
 -11  -1   5  124.99    6.10
  11  -1  -5  126.79    5.80
 -11  -1   5  122.59    6.60
  11  -1  -5  129.59    6.00
 -11  -1   5  122.19    6.70
  11   1  -5  128.59    6.50
  11   1  -5  124.09    6.30
 -11   1   5  128.19    6.30
 -11   1   5  123.59    6.50
   9  -1  -5   68.29    4.30
  -9  -1   5   70.99    5.10
  -9  -1   5   70.39    4.30
  -9  -1   5   72.19    5.00
  -9  -1   5   70.99    5.20
  -9  -1   5   67.89    4.20
   9  -1  -5   66.29    4.30
  -9   1   5   69.39    4.80
  -9   1   5   74.49    5.20
   9   1  -5   76.29    4.80
   9   1  -5   67.99    4.90
   7  -1  -5  853.11   24.00
  -7  -1   5  834.82   23.90
  -7  -1   5  880.21   23.50
   7  -1  -5  858.71   24.20
  -7  -1   5  842.62   24.20
   7   1  -5  850.91   23.90
  -7   1   5  853.51   24.50
   7   1  -5  820.32   24.40
   7   1  -5  837.52   24.20
  -7   1   5  866.91   24.30
  -5  -1   5  218.58    7.90
   5  -1  -5  212.48    7.80
   5  -1  -5  214.18    7.70
   5  -1  -5  228.38    8.00
  -5  -1   5  211.28    7.70
  -5  -1   5  217.78    7.80
   5  -1  -5  205.28    7.80
  -5  -1   5  218.78    8.00
  -5   1   5  213.58    7.90
  -5   1   5  210.88    8.40
  -5   1   5  210.58    8.20
   5   1  -5  215.68    7.70
   5   1  -5  215.38    7.90
   5   1  -5  206.38    7.70
   3  -1  -5  114.59    5.50
  -3  -1   5  118.09    5.80
   3  -1  -5  120.09    5.60
  -3  -1   5  110.59    4.90
   3  -1  -5  116.99    5.50
   3  -1  -5  116.19    5.40
  -3   1   5  111.69    5.80
   3   1  -5  116.49    5.00
   3   1  -5  113.09    5.20
  -3   1   5  114.19    6.00
   3   1  -5  113.09    4.90
  -3   1   5  117.59    5.60
  -1  -1   5  475.65   14.30
   1  -1  -5  489.35   14.60
   1  -1  -5  487.55   14.80
   1  -1  -5  482.75   14.80
  -1  -1   5  484.55   13.90
   1  -1  -5  475.45   14.70
  -1  -1   5  487.95   14.90
   1  -1  -5  488.15   14.70
  -1   1   5  470.95   14.70
   1   1  -5  476.25   14.10
   1   1  -5  465.85   14.70
  -1   1   5  493.15   15.10
  -1   1   5  471.55   14.80
   1   1  -5  462.85   14.10
  -1   1   5  481.15   14.80
   1   1  -5  480.45   14.00
  -1   1   5  495.35   14.70
  -1  -1  -5  162.58    6.90
  -1  -1  -5  160.28    6.80
  -1  -1  -5  163.08    7.00
   1  -1   5  168.28    5.60
   1  -1   5  171.78    6.60
  -1  -1  -5  164.48    6.90
  -1  -1  -5  165.38    6.90
   1   1   5  157.38    6.60
   1   1   5  162.88    7.20
   1   1   5  156.68    6.90
   1   1   5  156.58    6.70
   1   1   5  170.68    7.20
  -1   1  -5  160.18    6.00
  -1   1  -5  162.98    6.20
  -1   1  -5  160.88    6.70
  -1   1  -5  163.48    5.80
  -3  -1  -5  225.88    8.60
   3  -1   5  212.98    8.00
  -3  -1  -5  212.68    8.30
  -3  -1  -5  215.28    8.30
   3  -1   5  206.38    6.80
  -3  -1  -5  226.18    8.40
  -3  -1  -5  216.48    8.60
  -3   1  -5  220.98    7.30
  -3   1  -5  222.48    8.30
  -3   1  -5  219.18    7.30
  -3   1  -5  206.58    7.00
  -3   1  -5  218.58    7.50
  -3   1  -5  209.98    7.70
   3   1   5  211.88    8.20
   3   1   5  225.78    8.70
   3   1   5  242.08    9.00
   3   1   5  212.58    8.50
   3   1   5  228.88    8.40
  -3   1  -5  216.08    7.20
  -5  -1  -5  244.88    9.30
  -5  -1  -5  239.08    9.50
  -5  -1  -5  237.68    9.20
   5  -1   5  248.58    7.60
   5  -1   5  244.68    7.50
  -5  -1  -5  248.38    9.50
  -5  -1  -5  234.58    9.20
   5   1   5  234.58    9.30
  -5   1  -5  236.38    8.20
  -5   1  -5  246.38    8.00
   5   1   5  236.48    9.50
   5   1   5  251.37    9.20
  -5   1  -5  236.68    8.50
  -5   1  -5  248.88    8.20
  -5   1  -5  254.27    8.10
   5   1   5  242.08    9.20
  -5   1  -5  245.68    8.20
   5   1   5  241.28    9.60
  -7  -1  -5  260.97   10.40
   7  -1   5  274.37    8.50
  -7  -1  -5  268.97   10.30
  -7  -1  -5  276.57   10.30
  -7  -1  -5  266.57   10.50
  -7  -1  -5  275.77   10.40
   7   1   5  269.27   10.60
   7   1   5  270.57   10.10
  -7   1  -5  271.07    9.00
  -7   1  -5  277.37    9.20
   7   1   5  291.27   10.80
  -7   1  -5  271.57    9.10
  -7   1  -5  279.87    9.40
   7   1   5  272.17   10.40
  -7   1  -5  268.97    9.50
   7   1   5  276.47   10.30
  -9  -1  -5    8.50    3.00
  -9  -1  -5    8.40    3.20
  -9  -1  -5    9.30    3.40
  -9  -1  -5    8.80    3.30
  -9   1  -5    6.80    2.60
  -9   1  -5    4.60    2.40
   9   1   5    8.70    3.60
  -9   1  -5    7.70    2.60
   9   1   5    8.50    3.20
   9   1   5    9.30    3.50
   9   1   5   11.60    3.00
  -9   1  -5    9.10    2.80
   9   1   5    8.40    3.20
  -9   1  -5    7.20    2.90
 -11  -1  -5  171.48    8.60
 -11  -1  -5  188.58    9.00
 -11  -1  -5  183.58    8.80
 -11  -1  -5  167.88    8.40
 -11  -1  -5  172.78    9.30
  11   1   5  180.88    8.80
  11   1   5  188.98    9.20
  11   1   5  179.68    9.20
 -11   1  -5  182.98    7.70
 -11   1  -5  189.68    7.90
  11   1   5  171.78    9.20
 -11   1  -5  174.08    7.80
  11   1   5  167.48    8.20
 -11   1  -5  163.98    8.00
 -11   1  -5  183.08    7.70
 -13  -1  -5  215.18   12.30
 -13  -1  -5  231.48   10.50
  13  -1   5  220.38    8.10
 -13  -1  -5  214.18   10.40
  13  -1   5  243.88    9.00
 -13  -1  -5  219.78   10.30
 -13   1  -5  222.88    9.50
 -13   1  -5  220.48    9.20
 -13   1  -5  213.28   10.20
  13   1   5  212.28   10.90
  13   1   5  222.98   10.30
 -13   1  -5  225.28    9.20
  13   1   5  212.98   10.60
 -13   1  -5  223.78    9.40
 -15  -1  -5   74.59    7.30
 -15  -1  -5   66.89    7.20
 -15  -1  -5   74.29    7.20
 -15  -1  -5   69.39    7.00
 -15   1  -5   83.69    6.20
  15   1   5   89.49    7.40
  15   1   5   82.59    7.20
 -15   1  -5   80.89    6.20
 -15   1  -5   83.99    6.50
 -17  -1  -5   14.80    4.60
 -17  -1  -5    4.30    4.30
 -17  -1  -5    7.60    4.90
 -17   1  -5    4.20    4.10
 -17   1  -5    4.70    3.60
  17   1   5   -4.60    3.60
 -17   1  -5    4.40    4.00
  17   1   5    0.20    4.00
 -17   1  -5    9.50    4.70
 -19  -1  -5   52.49    7.20
 -19  -1  -5   69.59    8.60
 -19  -1  -5   56.59    7.60
 -19   1  -5   57.29    6.50
 -19   1  -5   48.10    6.00
 -19   1  -5   52.39    6.60
 -19   1  -5   61.09    6.90
 -21  -1  -5   -6.80    4.80
 -21  -1  -5    0.30    5.20
 -21   1  -5    1.50    4.70
 -21   1  -5    8.90    4.60
 -21   1  -5    1.60    5.00
 -21   1  -5    0.40    4.20
 -23  -1  -5   74.39    9.30
 -23  -1  -5   85.69   11.60
 -23   1  -5   79.19    8.90
 -23   1  -5   75.49    8.50
 -23   1  -5   69.39    8.40
 -25  -1  -5   -5.50    5.50
 -25  -1  -5   24.80    7.30
 -25   1  -5    2.60    5.40
 -25   1  -5   18.90    6.40
 -27  -1  -5  121.59   11.70
 -27  -1  -5  116.19   11.10
 -27   1  -5  145.09   11.30
 -27   1  -5  113.29   10.30
 -29  -1  -5   -1.50    6.50
 -29   1  -5   -3.50    6.20
 -32  -2   5   70.89   10.70
 -32  -2   5   69.89    9.50
 -32   2   5   86.19   14.00
 -30  -2   5    7.00    9.00
 -30  -2   5   -0.20    6.10
 -30   2   5    6.20    6.30
 -30   2   5   -4.50    5.20
 -28  -2   5   30.00    7.70
 -28  -2   5   24.70    7.60
 -28   2   5   32.50    7.20
 -28   2   5   28.90    6.90
 -26  -2   5    1.70    4.60
 -26  -2   5   -2.50    5.30
 -26   2   5    8.10    5.20
 -26   2   5   -1.40    4.70
 -26   2   5    0.90    4.70
 -24  -2   5   15.80    5.80
 -24  -2   5   18.20    5.60
 -24   2   5   20.20    5.70
 -24   2   5   20.50    6.00
 -22  -2   5   17.70    5.90
 -22  -2   5   19.00    3.80
 -22  -2   5   19.40    5.70
 -22   2   5   20.50    5.30
 -22   2   5   11.80    5.40
 -20  -2   5   18.10    3.80
 -20  -2   5   12.50    5.10
 -20  -2   5   13.80    5.00
 -20   2   5   21.80    5.00
 -20   2   5   13.30    4.50
 -18  -2   5   48.60    6.50
 -18  -2   5   32.30    4.60
 -18  -2   5   30.50    5.80
  18   2  -5   44.10    6.40
 -18   2   5   35.10    5.50
 -18   2   5   42.60    5.40
 -16  -2   5   11.30    4.40
 -16  -2   5   14.40    3.80
  16  -2  -5   13.10    2.90
 -16  -2   5   19.40    4.00
  16  -2  -5   12.40    3.00
 -16  -2   5   10.70    4.30
  16   2  -5    9.40    4.00
 -16   2   5   15.80    4.10
 -16   2   5   10.60    3.80
  16   2  -5   13.90    3.80
  14  -2  -5   94.09    5.40
 -14  -2   5   92.49    6.80
  14  -2  -5   89.79    5.00
 -14  -2   5   73.79    6.00
  14  -2  -5   91.29    5.10
 -14  -2   5   92.89    6.20
 -14  -2   5   98.59    7.20
  14   2  -5   90.59    6.70
 -14   2   5   91.89    6.30
 -14   2   5   86.69    6.50
  14   2  -5   83.59    6.60
 -12  -2   5   27.30    4.20
  12  -2  -5   26.30    3.00
 -12  -2   5   28.80    4.50
  12  -2  -5   27.70    3.10
  12  -2  -5   32.10    3.50
 -12  -2   5   28.70    4.10
 -12  -2   5   29.50    4.10
 -12  -2   5   35.80    4.60
 -12   2   5   24.80    4.00
  12   2  -5   23.40    4.40
  12   2  -5   30.90    4.20
 -10  -2   5  258.87    9.90
  10  -2  -5  249.78    9.50
  10  -2  -5  249.97    8.80
 -10  -2   5  247.58    9.80
 -10  -2   5  268.27    9.90
  10  -2  -5  242.08    8.80
  10  -2  -5  246.78    8.80
 -10  -2   5  243.68    9.20
 -10  -2   5  261.47   10.40
 -10  -2   5  250.97   10.20
  10   2  -5  246.08    9.80
 -10   2   5  263.47   10.00
 -10   2   5  253.77    9.60
  10   2  -5  254.17   10.30
   8  -2  -5   63.29    4.20
  -8  -2   5   63.69    4.70
   8  -2  -5   68.39    4.30
  -8  -2   5   70.79    5.40
  -8  -2   5   68.89    4.80
   8  -2  -5   66.29    4.10
  -8  -2   5   63.99    4.70
   8  -2  -5   67.19    4.20
  -8  -2   5   64.69    5.10
  -8  -2   5   57.99    4.60
  -8  -2   5   64.49    4.30
   8  -2  -5   67.89    5.20
  -8   2   5   63.99    6.10
   8   2  -5   58.59    4.60
   8   2  -5   63.99    5.00
   8   2  -5   67.99    4.80
  -8   2   5   65.39    5.20
  -8   2   5   62.89    4.80
  -6  -2   5  742.23   21.60
   6  -2  -5  739.33   21.30
  -6  -2   5  774.42   22.10
  -6  -2   5  726.93   21.40
   6  -2  -5  723.43   21.40
  -6  -2   5  732.13   21.40
  -6  -2   5  731.73   21.20
   6  -2  -5  724.33   21.20
  -6  -2   5  740.03   22.30
  -6  -2   5  720.43   20.80
  -6   2   5  750.32   22.20
   6   2  -5  754.72   21.00
   6   2  -5  727.73   21.60
   6   2  -5  724.63   21.90
  -6   2   5  725.83   22.70
  -6   2   5  768.02   21.90
  -4  -2   5   84.59    4.30
  -4  -2   5   90.59    4.30
  -4  -2   5   86.79    5.80
   4  -2  -5   80.89    4.80
  -4  -2   5   78.09    4.20
  -4  -2   5   75.69    5.20
   4  -2  -5   85.69    4.90
   4  -2  -5   80.79    4.80
  -4   2   5   78.69    5.20
   4   2  -5   85.59    4.90
  -4   2   5   82.69    5.50
  -4   2   5   86.69    6.20
   4   2  -5   84.09    4.70
   2  -2  -5  175.18    7.30
   2  -2  -5  188.48    7.40
   2  -2  -5  175.58    7.40
  -2  -2   5  175.78    5.80
   2  -2  -5  178.78    7.20
   2  -2  -5  178.58    8.00
  -2  -2   5  191.18    8.30
  -2  -2   5  179.68    5.80
  -2  -2   5  189.88    7.80
   2   2  -5  181.08    6.60
   2   2  -5  173.38    6.70
  -2   2   5  175.88    8.30
  -2   2   5  172.78    7.40
  -2   2   5  186.48    8.10
  -2   2   5  184.08    7.90
  -2   2   5  179.48    7.60
   0  -2  -5   10.30    3.10
   0  -2  -5    7.20    2.60
   0  -2  -5    5.40    2.50
   0  -2   5   11.30    3.10
   0  -2  -5    7.20    2.80
   0  -2   5    0.30    3.10
   0   2   5    6.70    2.70
   0   2   5    6.30    3.30
   0   2  -5    5.30    2.00
   0   2   5    6.90    3.10
   0   2   5    7.20    3.00
   0   2  -5    9.00    1.80
   0   2   5    2.20    2.50
   2  -2   5   28.70    4.40
   2  -2   5   31.60    4.20
  -2  -2  -5   31.80    4.50
  -2  -2  -5   29.10    4.00
  -2  -2  -5   26.80    3.90
  -2  -2  -5   31.60    3.90
  -2  -2  -5   31.70    3.90
   2   2   5   30.60    4.80
   2   2   5   19.10    4.00
  -2   2  -5   25.70    2.50
   2   2   5   24.60    4.00
   2   2   5   31.60    4.10
   2   2   5   30.80    3.90
  -4  -2  -5   99.79    5.90
   4  -2   5  103.49    6.80
  -4  -2  -5  104.89    6.50
  -4  -2  -5  107.39    6.20
  -4  -2  -5  108.89    6.30
  -4  -2  -5  109.09    6.20
   4  -2   5  105.29    6.20
   4   2   5  104.49    6.80
   4   2   5  105.29    7.00
   4   2   5  107.59    6.60
   4   2   5  109.49    6.60
   4   2   5  112.79    6.30
  -4   2  -5  104.09    4.20
  -6  -2  -5    0.70    3.00
  -6  -2  -5    3.80    2.80
   6  -2   5    2.70    2.90
   6  -2   5    3.10    3.50
  -6  -2  -5    4.20    2.80
  -6  -2  -5    1.30    3.00
  -6  -2  -5    4.70    2.90
   6   2   5   -2.40    3.10
  -6   2  -5   -0.20    1.50
   6   2   5    2.30    3.30
  -6   2  -5    1.10    1.60
   6   2   5    3.70    3.00
   6   2   5    0.90    3.70
   6   2   5   -2.30    2.60
  -8  -2  -5    6.90    3.70
  -8  -2  -5    3.20    2.80
  -8  -2  -5    2.20    3.00
  -8  -2  -5    3.40    3.40
  -8  -2  -5    4.60    4.00
   8   2   5    1.90    4.50
   8   2   5    9.90    4.50
   8   2   5    5.10    3.40
  -8   2  -5    3.20    1.90
   8   2   5    5.80    3.90
  -8   2  -5    1.40    1.90
   8   2   5    3.00    3.40
 -10  -2  -5   56.79    6.30
 -10  -2  -5   49.20    5.70
 -10  -2  -5   43.40    5.80
  10   2   5   41.80    5.40
  10   2   5   40.90    6.00
  10   2   5   46.90    6.20
 -10   2  -5   62.59    6.70
 -10   2  -5   46.20    4.10
  10   2   5   45.60    5.80
 -10   2  -5   37.60    3.80
 -12  -2  -5  445.86   18.20
 -12  -2  -5  465.15   17.40
 -12  -2  -5  478.75   19.00
  12   2   5  467.05   17.20
 -12   2  -5  465.15   14.60
  12   2   5  471.95   17.80
  12   2   5  467.75   17.80
 -12   2  -5  469.65   14.30
  12   2   5  444.56   16.90
 -12   2  -5  466.85   14.70
 -12   2  -5  462.75   17.30
 -14  -2  -5  120.79    9.00
 -14  -2  -5  121.79    8.90
  14   2   5  119.69    9.10
 -14   2  -5  113.39    6.40
  14   2   5  130.29    8.80
 -14   2  -5  112.49    6.50
 -14   2  -5  109.09    6.20
 -14   2  -5  115.29    6.50
  14   2   5  118.89    9.50
 -16  -2  -5  118.79    9.60
 -16  -2  -5  134.79   10.00
  16   2   5  116.59   11.40
 -16   2  -5  139.49    7.30
 -16   2  -5  122.89    7.20
 -16   2  -5  125.59    7.00
  16   2   5  129.99   10.20
 -16   2  -5  127.79    7.50
  16   2   5  143.59    9.70
 -18  -2  -5   62.09    7.90
 -18  -2  -5   54.79    7.50
 -18   2  -5   63.89    6.10
  18   2   5   56.19    7.60
  18   2   5   72.89    9.60
 -18   2  -5   63.29    6.30
 -18   2  -5   60.49    6.70
 -18   2  -5   67.29    6.20
  18   2   5   54.99    7.70
 -20  -2  -5   66.69    9.20
 -20  -2  -5   63.49    8.40
 -20   2  -5   65.49    6.60
 -20   2  -5   65.29    7.10
 -20   2  -5   58.69    6.80
 -20   2  -5   61.99    7.30
 -22  -2  -5   27.80    7.50
 -22   2  -5   44.90    6.70
 -22   2  -5   39.80    5.70
 -22   2  -5   52.49    6.80
 -24  -2  -5   11.60    6.20
 -24  -2  -5   20.00    8.40
 -24   2  -5   18.20    6.00
 -24   2  -5   16.00    5.60
 -26  -2  -5   46.20    8.20
 -26  -2  -5   62.79    9.30
 -26   2  -5   47.20    7.10
 -26   2  -5   45.70    7.20
 -28  -2  -5   -3.70    7.10
 -28   2  -5   -3.00    5.70
 -29  -3   5    5.40    6.30
 -29  -3   5    6.30    8.10
 -29   3   5   -3.80    5.30
 -29   3   5   -5.80    5.20
 -27  -3   5   -1.50    6.30
 -27   3   5   10.20    5.60
 -27   3   5    4.70    5.50
 -25  -3   5   70.39    9.10
 -25  -3   5   77.69    9.30
 -25  -3   5   92.49    7.80
 -25   3   5   70.39    8.10
 -25   3   5   86.29    8.50
 -23  -3   5   17.90    5.70
 -23  -3   5   27.80   11.80
 -23  -3   5   16.40    5.10
 -23   3   5   24.00    5.80
 -21  -3   5   13.40    5.50
 -21  -3   5   25.10    5.70
 -21  -3   5   22.10    5.10
 -21   3   5   13.40    4.90
 -21   3   5   20.40    5.50
  19  -3  -5    5.40    3.70
 -19  -3   5   -6.10    3.90
 -19  -3   5   -0.60    4.10
 -19   3   5   -0.20    3.90
 -19   3   5    7.60    4.60
  19   3  -5   -3.70    5.10
  17  -3  -5    4.60    3.80
 -17  -3   5    0.00    4.00
 -17  -3   5   -4.70    4.20
 -17  -3   5   -3.80    4.00
 -17  -3   5   -1.60    4.10
 -17   3   5    1.50    4.00
  17   3  -5   -9.20    4.00
 -17   3   5    1.80    3.80
 -15  -3   5  147.49    9.30
 -15  -3   5  132.09    9.90
 -15  -3   5  124.09    9.00
 -15  -3   5  142.09    8.50
  15  -3  -5  148.29    8.30
 -15   3   5  145.09   10.40
  15   3  -5  137.19    8.90
 -15   3   5  157.98    8.30
 -15   3   5  144.59    8.30
  15   3  -5  140.29    9.30
 -13  -3   5  186.48    9.30
 -13  -3   5  160.48    8.60
 -13  -3   5  180.38    9.60
 -13  -3   5  184.68    9.90
  13  -3  -5  199.58    9.60
 -13  -3   5  195.48    9.90
  13   3  -5  186.18    9.80
 -13   3   5  192.18    8.70
 -13   3   5  180.68   11.10
 -13   3   5  188.58    9.10
  13   3  -5  195.08   10.20
  13   3  -5  179.68    9.60
  11  -3  -5   80.59    6.90
 -11  -3   5   79.19    7.10
 -11  -3   5   84.79    6.00
 -11  -3   5   90.79    6.40
 -11  -3   5   89.59    7.40
  11   3  -5   91.99    7.00
  11   3  -5   85.69    6.60
  11   3  -5   81.79    6.40
 -11   3   5   80.89    6.20
 -11   3   5   72.29    8.10
 -11   3   5   83.99    6.50
  -9  -3   5   -0.90    2.90
   9  -3  -5    0.00    1.80
   9  -3  -5   -0.30    2.00
  -9  -3   5    5.00    2.80
   9  -3  -5    3.00    2.50
  -9  -3   5   -4.20    3.40
  -9  -3   5   -5.10    4.00
  -9  -3   5    2.10    3.80
   9  -3  -5   -2.00    3.70
   9   3  -5   -1.50    3.00
  -9   3   5   -4.40    4.10
   9   3  -5   -2.20    3.20
   9   3  -5   -1.60    3.20
  -9   3   5   -3.20    3.10
  -9   3   5   -1.00    3.10
   7  -3  -5   16.80    2.60
  -7  -3   5   20.90    4.60
  -7  -3   5   20.80    3.40
   7  -3  -5   24.00    4.80
   7  -3  -5   12.20    3.00
   7  -3  -5   19.40    2.80
  -7  -3   5   18.60    3.10
  -7  -3   5   17.90    4.60
  -7  -3   5   14.70    3.00
   7  -3  -5   18.90    3.00
  -7   3   5    8.10    3.50
   7   3  -5   17.80    3.70
  -7   3   5   14.80    4.90
   7   3  -5   21.50    4.00
  -7   3   5   18.20    4.00
   7   3  -5   20.80    3.80
  -5  -3   5  134.79    5.50
   5  -3  -5  148.69    6.90
   5  -3  -5  150.68    8.80
  -5  -3   5  165.78    8.40
  -5  -3   5  147.39    8.90
  -5  -3   5  143.09    5.80
   5  -3  -5  138.49    6.50
   5  -3  -5  133.89    6.20
  -5  -3   5  154.68    7.70
  -5  -3   5  156.18    6.80
  -5  -3   5  139.89    6.10
   5   3  -5  154.78    7.10
   5   3  -5  152.88    7.30
  -5   3   5  141.49    9.00
   5   3  -5  134.39    6.90
  -5   3   5  138.39    7.90
  -5   3   5  137.89    8.10
   3  -3  -5  815.62   23.60
   3  -3  -5  805.42   23.50
   3  -3  -5  804.52   23.40
  -3  -3   5  808.12   24.70
   3  -3  -5  748.23   23.20
  -3  -3   5  812.72   25.60
   3  -3  -5  777.82   25.20
  -3   3   5  827.32   24.90
   3   3  -5  758.22   23.60
  -3   3   5  794.32   24.00
   3   3  -5  782.22   23.10
   3   3  -5  783.62   23.10
  -3   3   5  824.22   24.50
  -3   3   5  803.32   25.60
  -3   3   5  803.12   24.20
   1  -3  -5  208.68   10.90
  -1  -3   5  191.38   10.10
   1  -3  -5  193.18    8.30
  -1  -3   5  194.58    9.40
   1   3  -5  192.28    7.60
  -1   3   5  196.38    8.70
   1   3  -5  192.68    7.90
  -1   3   5  191.08   10.20
  -1   3   5  194.78    8.80
  -1   3   5  198.78    9.40
   1   3  -5  187.48    7.30
  -1   3   5  204.28    9.80
  -1  -3  -5   46.70    5.00
  -1  -3  -5   47.00    4.80
   1  -3   5   56.19    6.70
   1  -3   5   51.69    5.70
  -1   3  -5   55.59    3.80
   1   3   5   55.19    5.50
  -1   3  -5   54.59    4.60
   1   3   5   48.20    5.40
   1   3   5   50.29    5.80
   1   3   5   53.89    6.10
   1   3   5   53.19    6.50
   3  -3   5    5.60    3.70
  -3  -3  -5    9.00    4.10
  -3  -3  -5    6.80    3.40
   3  -3   5    5.70    4.30
   3   3   5    2.20    4.20
   3   3   5   10.90    3.60
   3   3   5    7.30    3.70
   3   3   5    4.00    4.10
  -3   3  -5   10.90    3.10
   3   3   5   14.00    4.80
  -5  -3  -5   28.40    5.10
  -5  -3  -5   32.50    4.80
   5  -3   5   31.50    5.80
   5  -3   5   25.60    4.80
  -5   3  -5   31.40    4.20
   5   3   5   35.30    5.10
   5   3   5   19.70    4.70
   5   3   5   31.30    6.10
   5   3   5   24.30    5.50
   5   3   5   25.20    4.70
  -7  -3  -5   31.20    5.40
  -7  -3  -5   31.50    5.30
   7  -3   5   30.50    5.20
   7  -3   5   39.30    6.00
   7   3   5   38.10    6.00
  -7   3  -5   36.20    5.00
   7   3   5   36.00    6.20
   7   3   5   49.60    9.50
   7   3   5   42.90    6.20
   7   3   5   37.20    5.40
  -9  -3  -5   93.89    7.90
   9  -3   5  109.39    8.80
   9  -3   5  111.29    7.80
  -9  -3  -5   94.59    8.40
   9   3   5  106.09    8.90
   9   3   5  103.29    8.10
   9   3   5   95.69    9.90
   9   3   5  102.59    8.80
   9   3   5   97.69    8.50
 -11  -3  -5   19.20    5.70
  11  -3   5   24.00    5.90
 -11  -3  -5   15.90    5.50
  11   3   5   24.30    5.50
  11   3   5   18.40    5.90
  11   3   5   14.80    5.80
  11   3   5   32.90    5.70
 -13  -3  -5    3.60    4.20
 -13  -3  -5   -0.20    4.30
  13   3   5    3.90    5.10
  13   3   5    6.80    5.20
  13   3   5    3.90    5.10
 -15  -3  -5   56.39    7.60
 -15  -3  -5   72.09    9.40
  15   3   5   65.79    8.60
  15   3   5   59.39    8.60
  15   3   5   53.39    7.80
 -17  -3  -5   -2.80    5.00
 -17  -3  -5    7.60    5.50
  17   3   5    6.60    5.50
 -17   3  -5   -1.80    3.10
  17   3   5   -1.80    5.10
 -19  -3  -5   28.30    7.10
 -19  -3  -5   34.80    7.40
  19   3   5   17.50    7.50
  19   3   5    3.60    5.90
  19   3   5   21.40    6.20
 -21  -3  -5    0.80    6.00
 -21   3  -5   11.40    3.90
 -21   3  -5    5.10    3.50
 -23  -3  -5    3.80    5.80
 -23  -3  -5    6.40    6.30
 -23  -3  -5    1.00    5.90
 -23   3  -5   15.10    4.10
 -23   3  -5    6.10    4.20
 -25  -3  -5    4.60    6.00
 -25  -3  -5    2.30    7.00
 -25  -3  -5   13.40    7.60
 -25   3  -5   -9.30    4.40
 -26  -4   5   16.70    7.20
 -26  -4   5   23.70    6.00
 -26   4   5   15.30    8.40
 -26   4   5   15.80    5.30
 -24  -4   5   15.80    6.80
 -24  -4   5    8.80    6.70
 -24  -4   5    7.70    5.30
 -24   4   5    2.00    4.40
 -24   4   5    2.10    8.30
 -24   4   5    4.80    4.80
 -22  -4   5    5.40   10.00
  22  -4  -5    4.80    4.60
 -22  -4   5    7.00    6.30
 -22  -4   5    4.60    5.40
 -22  -4   5    4.90    5.10
 -22   4   5   13.60    5.00
 -22   4   5   11.30    4.80
 -22   4   5   15.20    7.70
  20  -4  -5    1.10    4.70
 -20  -4   5   -5.70    5.90
 -20  -4   5   -3.10    4.60
 -20  -4   5   -6.80    6.00
 -20  -4   5   -1.20    5.20
 -20   4   5    6.90    4.20
 -20   4   5   -2.10    6.30
 -20   4   5    8.80    4.40
 -18  -4   5   -4.20    8.10
 -18  -4   5    4.70    4.20
 -18  -4   5    1.70    5.60
 -18  -4   5    1.10    5.50
  18  -4  -5   11.40    5.10
 -18   4   5    8.40    7.20
 -18   4   5    3.20    4.50
 -18   4   5    4.80    4.10
 -16  -4   5   29.80    6.80
 -16  -4   5   41.90    7.50
 -16  -4   5   22.50    5.00
  16  -4  -5   38.10    6.50
  16   4  -5   46.10    7.40
 -16   4   5   26.70    9.30
 -16   4   5   34.50    5.30
 -16   4   5   26.30    5.90
 -14  -4   5   10.40    3.70
 -14  -4   5   17.80    6.20
  14  -4  -5   24.20    6.00
 -14  -4   5   15.20    4.20
 -14  -4   5   21.90    6.00
  14  -4  -5   17.10    3.70
 -14   4   5   22.10    4.90
 -14   4   5   18.50    4.60
  14   4  -5   19.60    5.70
  14   4  -5   17.00    6.00
  14   4  -5   13.90    5.40
 -14   4   5   14.10    6.40
 -12  -4   5   16.00    3.80
  12  -4  -5   12.90    3.70
 -12  -4   5   18.70    6.10
 -12  -4   5   17.40    5.10
 -12  -4   5    7.50    5.30
  12  -4  -5   26.60    5.90
  12   4  -5   18.70    5.80
  12   4  -5   18.90    5.10
 -12   4   5   14.90    4.70
 -12   4   5   22.30    7.10
 -12   4   5   11.70    4.50
  12   4  -5   11.30    4.90
 -10  -4   5   22.80    4.90
  10  -4  -5   21.00    5.70
 -10  -4   5   15.20    5.60
  10  -4  -5   15.20    3.80
 -10  -4   5   22.90    3.70
 -10  -4   5   18.00    5.90
  10   4  -5   14.50    4.90
 -10   4   5   18.50    4.80
  10   4  -5   11.10    5.00
 -10   4   5   14.40    6.50
  10   4  -5   17.50    4.70
 -10   4   5   15.00    4.50
   8  -4  -5   83.99    6.60
  -8  -4   5   98.39    8.50
  -8  -4   5   77.29    7.60
   8  -4  -5  107.79    9.40
  -8  -4   5  105.09    8.20
  -8  -4   5   90.79   11.90
  -8   4   5   84.59    9.30
   8   4  -5   94.29    8.30
  -8   4   5   78.39    7.70
   8   4  -5   92.19    7.50
  -8   4   5   88.59    7.30
  -6  -4   5  148.69    9.70
   6  -4  -5  118.09    7.80
  -6  -4   5  154.18   16.60
   6  -4  -5  137.69   10.20
   6   4  -5  130.29    7.70
  -6   4   5  115.19    9.10
   6   4  -5  154.68    8.30
  -6   4   5  115.89    8.70
  -6   4   5  138.19   10.40
   6   4  -5  138.19    8.20
  -4  -4   5   46.60    7.00
   4  -4  -5   39.80    6.20
  -4  -4   5   70.49   14.20
   4  -4  -5   50.29    5.70
  -4   4   5   54.19    5.90
  -4   4   5   60.89    8.30
  -4   4   5   42.10    6.30
   4   4  -5   50.69    5.70
   4   4  -5   49.30    5.20
   4   4  -5   57.49    6.30
  -4   4   5   49.30    6.30
   2  -4  -5    3.10    2.40
   2  -4  -5    4.40    4.00
  -2  -4   5    0.60    4.90
  -2  -4   5   -5.80    4.40
   2  -4  -5    4.50    7.00
   2  -4  -5    0.20    2.90
  -2   4   5   -0.50    5.00
  -2   4   5    5.60    3.50
   2   4  -5    5.00    3.00
   2   4  -5   -1.90    3.10
   2   4  -5   10.50    3.80
  -2   4   5    1.90    4.10
  -2   4   5   -0.30    4.50
  -2   4   5    4.30    3.80
   0  -4  -5   24.60    8.90
   0  -4   5   13.60    5.30
   0  -4  -5   13.50    3.30
   0  -4  -5   15.60    3.60
   0  -4   5   13.70    5.00
   0  -4  -5   17.90    4.60
   0   4   5   13.30    6.20
   0   4  -5   16.60    3.20
   0   4   5   17.80    4.30
   0   4  -5   20.10    4.20
   0   4   5   12.70    4.90
   0   4   5   15.00    5.30
   0   4   5   15.00    4.20
  -2  -4  -5   67.49    7.80
   2  -4   5   55.49    8.30
   2  -4   5   46.10    7.10
  -2  -4  -5   61.19    8.50
  -2  -4  -5   47.40    5.30
  -2  -4  -5   50.49    5.80
   2   4   5   44.80    7.80
   2   4   5   55.09    6.80
  -2   4  -5   51.89    5.90
   2   4   5   39.00    6.80
  -2   4  -5   50.89    4.00
   2   4   5   48.30    6.90
  -4  -4  -5   -2.00    4.70
  -4  -4  -5    1.60    5.50
   4  -4   5    0.80    5.80
   4  -4   5    1.00    4.50
  -4  -4  -5    1.00    3.30
   4   4   5   -1.30    4.30
   4   4   5    0.80    4.30
   4   4   5    4.60    4.20
   4   4   5    3.50    4.60
  -4   4  -5    9.30    3.90
   4   4   5    0.20    5.90
   6  -4   5   15.70    5.60
  -6  -4  -5   19.00    6.20
  -6  -4  -5    2.20    3.80
  -6  -4  -5   14.20    4.40
   6  -4   5   12.50    6.10
   6   4   5   15.40    5.10
  -6   4  -5   14.10    8.00
   6   4   5    8.40    4.80
   6   4   5   13.40    5.40
   6   4   5    5.70    6.00
   6   4   5    5.10    5.40
  -8  -4  -5    2.30    4.20
   8  -4   5   -3.60    4.30
   8  -4   5   -0.90    5.30
  -8  -4  -5   -2.60    5.40
  -8  -4  -5   -2.00    3.90
   8   4   5    8.70    5.70
   8   4   5   -2.50    5.50
   8   4   5   -3.90    4.30
   8   4   5   -2.00    5.40
  -8   4  -5   10.20    4.40
  10  -4   5    6.10    5.00
 -10  -4  -5   13.70    5.50
 -10  -4  -5    6.30    4.80
  10  -4   5   13.70    6.40
 -10  -4  -5    9.90    6.90
  10   4   5   11.20    6.20
  10   4   5    9.30    5.90
 -10   4  -5   16.90    4.80
  10   4   5    7.00    5.30
  10   4   5   20.70    6.60
 -12  -4  -5   21.60    5.90
  12  -4   5   25.60    6.90
 -12  -4  -5   34.70    8.60
 -12  -4  -5   21.80    6.00
  12   4   5   20.50    6.80
  12   4   5   12.30    6.60
 -12   4  -5   34.00    5.90
  12   4   5   13.80    6.70
 -14  -4  -5    1.00    5.10
 -14  -4  -5   -3.20    5.70
 -14  -4  -5    5.10    5.40
  14   4   5   -2.70    4.90
 -14   4  -5   10.20    5.50
  14   4   5    3.80    5.60
 -16  -4  -5   24.90    8.30
 -16  -4  -5   16.90    6.40
 -16  -4  -5   17.00    6.30
  16   4   5   20.50    8.00
 -16   4  -5   23.60    6.50
  16   4   5   22.10    7.70
  16   4   5   15.60    6.30
 -18  -4  -5    4.90    6.30
 -18  -4  -5    3.20    6.20
 -18  -4  -5    0.40    6.30
  18   4   5   -1.80    5.80
  18   4   5   -4.20    6.50
  18   4   5    6.40    6.80
 -18   4  -5   -9.60    6.50
 -20  -4  -5   16.50    7.30
 -20  -4  -5   12.20    7.10
 -20  -4  -5    2.80    8.10
 -20   4  -5    3.10    6.60
  20   4   5   16.00    7.30
 -22  -4  -5    8.10    7.20
 -22   4  -5    9.90    7.00
 -19  -5   5    2.90    5.90
  19  -5  -5    6.00    6.70
 -19  -5   5   12.80    7.70
 -19   5   5    4.60    7.10
 -19   5   5    8.20    4.60
  17  -5  -5   -0.40    5.90
 -17  -5   5    7.10    7.00
 -17  -5   5    3.30    6.30
 -17   5   5    6.70    4.30
 -17   5   5    4.00    6.40
  15  -5  -5    9.10    5.90
 -15  -5   5   -3.50    5.70
 -15   5   5   14.00    4.50
 -15   5   5   14.00    7.20
 -15   5   5    4.50    4.70
  15   5  -5   -6.80    5.90
 -13  -5   5   -3.10    5.70
  13  -5  -5    7.00    3.90
 -13  -5   5  -11.30    5.50
  13  -5  -5    3.00    5.40
 -13   5   5   -1.30    6.70
 -13   5   5   -4.70    4.20
  13   5  -5   12.50    6.30
 -13   5   5   -1.90    4.50
 -11  -5   5   -1.80    6.30
 -11  -5   5    9.10    7.10
  11  -5  -5   -0.90    3.90
  11  -5  -5    7.80    6.30
 -11   5   5    7.60    4.70
  11   5  -5    4.00    5.40
 -11   5   5    7.50    4.70
 -11   5   5    6.20    6.20
   9  -5  -5   14.80    4.80
  -9  -5   5    1.00    6.50
   9  -5  -5    9.50    6.10
  -9  -5   5    8.60    6.20
  -9   5   5    6.10    6.50
  -9   5   5   13.80    5.30
   9   5  -5   11.00    5.70
  -9   5   5   12.50    5.10
  -7  -5   5   72.69    9.30
   7  -5  -5   63.29    6.70
   7  -5  -5   71.59   10.60
  -7  -5   5   73.39   10.30
  -7   5   5   76.69    8.30
  -7   5   5   72.69    7.80
  -7   5   5   87.19   10.90
   7   5  -5   67.99    7.70
   7   5  -5   87.49    8.20
  -5  -5   5   -7.20    5.10
  -5  -5   5   10.60    6.80
   5  -5  -5   11.10    6.80
   5  -5  -5   12.30    4.90
   5   5  -5   14.60    5.10
   5   5  -5    1.20    4.80
  -5   5   5   11.10    6.30
   5   5  -5    6.40    4.40
  -5   5   5    6.80    5.00
  -5   5   5    9.60    5.40
  -3  -5   5   49.90    8.10
   3  -5  -5   50.29    6.50
   3  -5  -5   52.19    9.60
  -3  -5   5   46.40    8.30
   3   5  -5   48.40    5.80
   3   5  -5   44.10    5.50
  -3   5   5   45.60    7.00
  -3   5   5   54.09    7.10
  -3   5   5   50.59    8.40
   3   5  -5   51.99    6.80
   1  -5  -5    9.40    6.10
   1  -5  -5    3.80    5.00
  -1  -5   5   -2.30    5.40
  -1  -5   5    3.80    5.90
   1   5  -5   16.10    5.30
  -1   5   5    7.10    6.00
   1   5  -5    7.10    3.90
  -1   5   5   -0.80    4.90
  -1   5   5    1.10    5.50
  -1   5   5   11.00    4.80
   1  -5   5  -11.60    6.10
   1  -5   5    2.90    5.80
  -1  -5  -5   -2.60    4.30
  -1  -5  -5   -2.80    6.10
   1   5   5   -6.20    5.00
  -1   5  -5    9.10    3.30
   1   5   5   -3.90    4.80
  -1   5  -5   -8.20    4.40
   1   5   5   -6.80    5.00
   3  -5   5   16.30    6.40
   3  -5   5   21.40    7.90
  -3  -5  -5   12.80    5.60
  -3  -5  -5    3.80    7.00
   3   5   5   11.60    7.20
  -3   5  -5   24.30    5.40
   3   5   5   16.30    6.60
   3   5   5    9.90    5.90
   5  -5   5   10.90    5.40
   5  -5   5    3.70    6.30
  -5  -5  -5    9.50    5.20
  -5  -5  -5   -1.40    7.40
   5   5   5    1.80    5.70
  -5   5  -5   12.40    5.50
   5   5   5    6.10    5.90
   5   5   5    4.90    6.00
  -7  -5  -5    0.30    6.10
   7  -5   5    7.50    6.50
  -7  -5  -5    3.10    5.50
   7  -5   5   16.70    6.80
   7   5   5   16.90    6.70
   7   5   5   19.10    6.80
   7   5   5   25.50    7.70
  -7   5  -5   19.40    5.90
  -9  -5  -5   -2.80    5.70
  -9  -5  -5    6.30    7.00
   9  -5   5   -0.60    5.20
   9  -5   5   -0.20    6.60
   9   5   5    3.00    6.40
   9   5   5   -3.20    5.50
  -9   5  -5    3.90    5.70
   9   5   5    2.80    5.60
  11  -5   5   17.20    6.20
 -11  -5  -5   15.30    7.80
 -11  -5  -5   17.00    6.70
  11  -5   5   21.80    7.70
  11   5   5    5.00    6.70
  11   5   5   13.40    6.20
 -11   5  -5   26.00    6.50
  11   5   5   13.60    7.30
 -13  -5  -5   95.79   13.10
  13  -5   5   78.89   11.10
  13   5   5   55.49    9.40
  13   5   5   68.59    9.80
  13   5   5   62.39   10.10
 -13   5  -5   89.39    9.70
 -15  -5  -5   32.50   10.00
  15   5   5   17.30   13.80
  15   5   5   21.80    8.20
 -15   5  -5   35.40    7.40
  15   5   5   20.20    8.00
   6  -6  -5  -10.40    5.00
  -6  -6   5   -0.20    6.20
   6  -6  -5    9.00    7.60
  -6  -6   5    1.50    7.50
  -6   6   5    0.60    5.60
  -4  -6   5    4.00    8.80
   4  -6  -5    5.90    7.00
  -4  -6   5    2.60    5.90
   4  -6  -5    5.40    7.60
  -4   6   5    6.50    6.00
  -2  -6   5    0.10    6.10
   2  -6  -5    6.30    8.00
  -2  -6   5    1.30    6.90
  -2   6   5   -1.20    6.00
   0  -6   5   15.90    8.00
   0  -6  -5   13.10    7.30
   0  -6  -5    6.70    6.00
   0  -6   5    4.70    6.20
   0   6   5    3.10    6.50
   0   6   5    9.60    5.70
   2  -6   5   13.20    6.70
  -2  -6  -5    8.60    5.90
   2   6   5   -0.90    6.60
 -34   0   6    8.70    6.90
 -32   0   6   -0.60    6.00
 -32   0   6   -1.80    6.30
 -30   0   6   31.90    7.10
 -30   0   6   20.70    7.40
 -28   0   6   -6.40   10.00
 -28   0   6    6.70    6.60
 -26   0   6   52.39    8.00
 -26   0   6   42.20    7.00
 -26   0   6   43.80    7.50
 -24   0   6   -1.40    8.10
 -24   0   6    1.70    4.80
 -24   0   6    2.90    4.90
 -22   0   6  605.64   21.80
 -22   0   6  624.14   21.80
 -22   0   6  649.14   22.50
 -20   0   6  725.03   24.20
 -20   0   6  718.23   23.70
 -18   0   6  796.82   25.30
 -18   0   6  823.12   26.00
  18   0  -6  800.02   27.30
 -16   0   6  221.38   10.30
  16   0  -6  200.78    9.00
 -16   0   6  208.48    9.60
  16   0  -6  218.38   12.60
 -14   0   6    0.00    2.80
  14   0  -6   -2.80    2.30
  14   0  -6    4.20    2.40
 -14   0   6   -1.40    2.80
 -12   0   6  453.65   15.50
  12   0  -6  498.05   15.80
  12   0  -6  498.45   16.20
 -12   0   6  474.65   15.90
 -10   0   6 1164.48   33.50
  10   0  -6 1201.28   33.40
  10   0  -6 1180.68   33.60
 -10   0   6 1205.18   33.90
  -8   0   6 2053.99   56.59
  -8   0   6 2108.49   56.89
   8   0  -6 2094.09   56.79
   8   0  -6 2118.39   56.59
  -6   0   6 1143.09   32.00
  -6   0   6 1157.18   32.20
   6   0  -6 1156.58   32.20
   6   0  -6 1133.59   31.90
  -4   0   6   33.30    3.90
  -4   0   6   34.20    3.30
   4   0  -6   36.90    2.50
  -4   0   6   46.80    4.10
   4   0  -6   45.90    3.90
   4   0  -6   38.90    4.00
  -2   0   6  725.73   20.10
   2   0  -6  717.33   21.00
   2   0  -6  719.83   20.80
   2   0  -6  727.93   20.00
  -2   0   6  725.03   20.90
  -2   0   6  737.93   21.10
   0   0  -6 7356.66  193.28
   0   0  -6 7480.85  194.28
   0   0   6 7429.46  193.28
   0   0  -6 7460.65  193.98
   0   0  -6 7331.17  193.48
   0   0   6 7418.16  193.98
   0   0  -6 7439.76  194.18
   0   0  -6 7402.86  193.98
  -2   0  -6   47.50    4.00
   2   0   6   45.70    4.10
  -2   0  -6   44.70    4.00
  -2   0  -6   47.90    4.00
   2   0   6   46.00    3.80
   2   0   6   39.10    3.90
  -2   0  -6   48.70    3.60
  -2   0  -6   48.90    4.30
   4   0   6 1018.50   28.40
   4   0   6 1037.40   28.60
  -4   0  -6 1000.10   28.60
   4   0   6 1018.00   28.60
   4   0   6 1033.90   28.50
   4   0   6 1024.80   28.80
  -4   0  -6 1005.60   28.30
  -4   0  -6 1002.10   28.70
  -4   0  -6 1022.30   28.70
  -4   0  -6  988.20   28.80
  -6   0  -6   33.60    3.90
  -6   0  -6   34.80    4.10
   6   0   6   38.60    3.80
   6   0   6   38.00    4.00
   6   0   6   33.90    3.70
   6   0   6   36.50    3.60
   6   0   6   36.80    4.00
  -6   0  -6   36.30    4.00
  -6   0  -6   35.20    3.90
  -6   0  -6   36.90    3.90
   8   0   6    2.70    2.60
  -8   0  -6    0.40    2.70
   8   0   6    2.60    2.20
  -8   0  -6    2.40    2.50
  -8   0  -6   -0.10    2.50
   8   0   6    3.40    2.60
   8   0   6    1.70    3.00
  -8   0  -6    3.20    2.60
   8   0   6    3.30    2.10
 -10   0  -6  425.26   14.20
  10   0   6  403.26   13.80
  10   0   6  405.66   13.90
 -10   0  -6  429.56   14.30
 -10   0  -6  422.16   14.40
  10   0   6  412.56   13.70
 -10   0  -6  417.96   14.30
  10   0   6  428.46   14.40
 -10   0  -6  410.16   14.50
 -12   0  -6   15.40    3.70
  12   0   6   14.60    3.50
 -12   0  -6   17.50    4.30
 -12   0  -6   14.60    3.90
 -12   0  -6   14.00    3.90
  12   0   6    9.10    3.40
 -12   0  -6   14.90    4.00
  14   0   6  296.27   12.30
 -14   0  -6  319.47   12.90
 -14   0  -6  324.17   12.70
  14   0   6  319.57   12.30
 -14   0  -6  330.37   13.30
 -14   0  -6  330.07   12.80
 -16   0  -6   -5.00    3.60
 -16   0  -6    1.90    3.80
 -16   0  -6   -6.40    4.00
 -16   0  -6    0.70    3.70
 -18   0  -6  236.58   11.70
 -18   0  -6  256.17   12.40
 -18   0  -6  234.78   11.90
 -18   0  -6  240.38   12.00
 -20   0  -6   66.49    7.70
 -20   0  -6   72.19    8.60
 -20   0  -6   74.19    8.50
 -20   0  -6   81.99    8.50
 -22   0  -6   36.70    7.40
 -24   0  -6   17.90    6.70
 -24   0  -6   15.00    6.40
 -26   0  -6   39.00    7.40
 -26   0  -6   58.49    8.70
 -28   0  -6   42.40    8.40
 -28   0  -6   52.19    9.50
 -33  -1   6   18.40    7.40
 -33  -1   6    3.00    6.70
 -33   1   6   24.40    7.60
 -33   1   6    6.30    7.00
 -31  -1   6   67.39    9.80
 -31  -1   6   53.49    8.80
 -31   1   6   63.39    9.00
 -31   1   6   48.30    8.20
 -29  -1   6  105.49   11.30
 -29  -1   6   89.79   10.20
 -29   1   6  107.79   10.20
 -29   1   6  112.29   10.40
 -27  -1   6    1.60    5.40
 -27   1   6    6.00    6.00
 -27   1   6    5.30    5.70
 -25  -1   6   89.49    9.10
 -25  -1   6   82.89    8.90
 -25   1   6   77.69    9.30
 -25   1   6   88.19    8.90
 -23  -1   6    7.80    5.00
 -23  -1   6    7.50    5.20
 -23   1   6   -1.00    4.70
 -23   1   6    1.50    4.80
 -21  -1   6   97.69    8.50
 -21  -1   6   94.79    8.20
 -21   1   6   73.09    7.70
 -21   1   6   74.99    8.20
 -19  -1   6  840.02   27.80
 -19  -1   6  786.92   27.30
 -19  -1   6  829.62   27.30
 -19   1   6  984.40   27.30
  19   1  -6  754.92   28.40
 -19   1   6  990.60   27.80
 -17   1   6   -0.50    3.10
 -17   1   6    2.20    3.80
 -15  -1   6  365.46   14.10
 -15  -1   6  375.26   14.50
 -15  -1   6  381.96   13.80
  15  -1  -6  412.36   13.30
  15  -1  -6  402.46   13.60
 -15   1   6  418.16   14.30
  15   1  -6  374.36   13.90
 -15   1   6  445.76   14.50
  15   1  -6  360.16   14.30
 -13  -1   6  122.19    7.20
  13  -1  -6  135.09    6.40
 -13  -1   6  121.59    5.40
 -13  -1   6  124.39    7.40
 -13  -1   6  127.69    6.70
  13  -1  -6  135.49    6.50
 -13   1   6  128.89    7.00
  13   1  -6  123.19    7.00
 -13   1   6  141.99    7.10
  13   1  -6  122.29    6.70
 -11  -1   6   53.19    4.90
 -11  -1   6   53.29    4.50
  11  -1  -6   54.09    4.20
 -11  -1   6   55.49    4.10
 -11  -1   6   52.29    3.90
  11  -1  -6   56.59    4.40
 -11  -1   6   54.19    5.30
  11   1  -6   48.00    4.50
  11   1  -6   49.40    4.90
  11   1  -6   65.89    4.30
 -11   1   6   60.39    5.10
 -11   1   6   55.29    4.80
  -9  -1   6  261.87    8.90
  -9  -1   6  268.97    9.10
   9  -1  -6  273.17   10.80
  -9  -1   6  261.57    9.90
  -9  -1   6  275.47    9.10
  -9  -1   6  265.17   10.10
   9   1  -6  263.07    9.70
  -9   1   6  275.67   10.10
   9   1  -6  262.77    9.20
   9   1  -6  266.07   10.10
  -9   1   6  266.77    9.90
  -7  -1   6   10.30    2.80
   7  -1  -6    7.90    2.40
  -7  -1   6    7.80    2.50
   7  -1  -6    8.30    2.60
  -7  -1   6    8.00    2.40
   7   1  -6   12.90    2.90
   7   1  -6    8.70    2.50
  -7   1   6    7.30    2.80
  -7   1   6    5.70    3.00
   5  -1  -6   33.30    3.60
  -5  -1   6   29.70    3.40
   5  -1  -6   21.90    3.20
  -5  -1   6   36.50    3.60
  -5  -1   6   31.90    3.30
   5  -1  -6   24.30    3.40
  -5  -1   6   32.10    3.50
   5  -1  -6   27.10    3.40
  -5   1   6   31.50    3.90
  -5   1   6   21.70    3.40
   5   1  -6   32.00    3.30
   5   1  -6   35.20    3.60
   5   1  -6   24.70    2.70
  -5   1   6   28.50    3.60
   5   1  -6   28.70    3.20
  -3  -1   6  344.27   10.90
   3  -1  -6  330.67   11.50
   3  -1  -6  352.76   11.50
   3  -1  -6  346.97   11.40
  -3  -1   6  351.66   11.70
  -3  -1   6  348.57   10.80
   3  -1  -6  344.17   11.30
  -3   1   6  336.27   11.50
   3   1  -6  342.47   11.10
   3   1  -6  345.67   11.40
  -3   1   6  342.87   11.60
   3   1  -6  332.17   10.70
  -3   1   6  348.97   11.90
   3   1  -6  337.37   10.90
   1  -1  -6 1156.08   32.90
   1  -1  -6 1176.88   33.00
   1  -1  -6 1195.78   32.80
   1  -1  -6 1133.99   32.60
  -1  -1   6 1152.48   32.00
   1  -1  -6 1161.58   32.70
  -1  -1   6 1180.58   32.30
  -1  -1   6 1178.38   31.90
   1   1  -6 1161.98   32.90
   1   1  -6 1179.28   32.10
  -1   1   6 1190.28   32.90
   1   1  -6 1182.68   32.30
   1   1  -6 1128.79   32.60
  -1   1   6 1171.78   32.90
  -1   1   6 1213.18   33.30
  -1  -1  -6   -1.10    2.20
  -1  -1  -6   -0.90    2.40
  -1  -1  -6   -0.90    2.60
  -1  -1  -6    0.70    2.40
  -1  -1  -6    0.20    2.40
   1  -1   6   -0.10    2.40
   1  -1   6   -1.20    1.70
  -1   1  -6   -0.20    1.90
   1   1   6   -0.60    2.30
  -1   1  -6    0.20    1.90
  -1   1  -6    0.30    1.90
   1   1   6   -0.70    2.50
   1   1   6    0.10    2.50
   1   1   6    0.50    2.80
   1   1   6   -1.40    2.10
  -3  -1  -6    0.10    2.60
   3  -1   6    0.20    1.60
  -3  -1  -6   -3.60    2.50
  -3  -1  -6   -2.60    2.30
  -3  -1  -6   -2.40    2.40
  -3  -1  -6    1.20    2.30
   3   1   6   -2.20    2.60
   3   1   6   -1.80    2.10
  -3   1  -6   -2.60    1.70
   3   1   6   -2.80    2.10
   3   1   6   -3.40    2.50
  -3   1  -6   -0.60    1.80
  -3   1  -6   -4.60    1.70
  -3   1  -6   -0.60    2.00
  -3   1  -6   -2.80    1.70
   3   1   6   -2.10    2.60
  -5  -1  -6   56.09    4.70
  -5  -1  -6   57.19    4.90
   5  -1   6   49.99    3.20
  -5  -1  -6   53.09    4.80
  -5  -1  -6   51.09    4.80
   5  -1   6   49.90    3.20
   5   1   6   59.99    5.20
  -5   1  -6   50.29    3.70
   5   1   6   51.59    5.10
  -5   1  -6   52.79    3.70
  -5   1  -6   48.30    3.70
  -5   1  -6   49.30    3.80
   5   1   6   49.90    4.90
   5   1   6   58.19    5.10
   5   1   6   52.59    4.70
  -5   1  -6   48.40    3.90
  -7  -1  -6  360.36   13.00
   7  -1   6  372.76   11.00
  -7  -1  -6  365.26   12.90
   7  -1   6  353.96   11.00
  -7  -1  -6  364.26   13.20
  -7  -1  -6  343.77   12.60
  -7   1  -6  364.46   11.60
  -7   1  -6  363.06   11.70
   7   1   6  362.96   13.30
   7   1   6  369.16   12.60
   7   1   6  349.07   13.10
  -7   1  -6  361.66   11.60
   7   1   6  354.16   12.80
   7   1   6  354.56   12.80
  -7   1  -6  351.26   11.80
  -7   1  -6  370.76   12.00
  -9  -1  -6  929.91   28.20
  -9  -1  -6  923.81   27.60
  -9  -1  -6  954.40   28.10
  -9  -1  -6  914.81   27.60
   9   1   6  938.91   28.10
   9   1   6  903.11   27.60
  -9   1  -6  911.11   26.40
  -9   1  -6  923.31   26.70
   9   1   6  893.21   27.30
  -9   1  -6  881.61   26.70
  -9   1  -6  933.41   26.40
   9   1   6  925.01   28.00
  -9   1  -6  943.81   26.60
   9   1   6  906.21   27.90
 -11  -1  -6  360.26   13.50
 -11  -1  -6  356.76   13.90
 -11  -1  -6  365.06   14.00
 -11  -1  -6  342.07   13.10
 -11   1  -6  329.97   12.10
 -11   1  -6  344.17   12.70
 -11   1  -6  360.56   12.50
 -11   1  -6  330.07   12.40
  11   1   6  367.86   13.90
  11   1   6  356.66   13.50
  11   1   6  367.26   13.40
 -13  -1  -6  391.96   15.60
 -13  -1  -6  433.76   15.70
 -13  -1  -6  403.96   15.40
 -13  -1  -6  405.16   16.80
 -13   1  -6  370.86   14.50
  13   1   6  431.36   16.10
 -13   1  -6  408.76   14.10
 -13   1  -6  429.36   14.60
 -13   1  -6  417.16   14.20
 -13   1  -6  402.96   14.60
  13   1   6  408.46   15.30
  13   1   6  407.86   15.70
 -15  -1  -6   32.10    5.30
 -15  -1  -6   34.10    5.90
 -15  -1  -6   35.80    5.80
 -15  -1  -6   23.50    5.30
 -15   1  -6   24.30    4.70
 -15   1  -6   36.60    5.10
 -15   1  -6   28.10    4.30
  15   1   6   27.10    5.20
 -15   1  -6   38.30    5.20
  15   1   6   32.30    5.70
 -17  -1  -6   -0.10    4.50
 -17  -1  -6   -2.10    4.10
 -17   1  -6    0.70    3.60
  17   1   6   -1.90    3.80
 -17   1  -6    4.50    4.00
  17   1   6    4.90    4.00
 -17   1  -6    2.60    4.40
 -17   1  -6    1.10    4.10
 -19  -1  -6    3.60    4.90
 -19  -1  -6    3.10    5.20
 -19  -1  -6   13.00    5.40
 -19   1  -6   10.60    4.80
 -19   1  -6    4.00    4.50
 -19   1  -6   -8.70    4.20
 -19   1  -6   13.80    4.60
 -21  -1  -6   16.60    5.90
 -21  -1  -6    0.30    5.20
 -21   1  -6    6.80    5.00
 -21   1  -6    7.90    5.10
 -21   1  -6   10.70    4.90
 -21   1  -6    0.40    4.60
 -23  -1  -6    0.40    6.10
 -23  -1  -6   -5.80    9.70
 -23   1  -6    7.30    5.50
 -23   1  -6    1.30    5.20
 -25  -1  -6  118.49   11.50
 -25  -1  -6  114.49   11.60
 -25   1  -6  142.29   10.90
 -25   1  -6  137.99   11.30
 -27  -1  -6   47.30    8.50
 -27  -1  -6   49.80    8.50
 -27   1  -6   44.80    7.80
 -27   1  -6   41.70    8.40
 -32  -2   6   15.80    6.60
 -32  -2   6   18.40    8.00
 -30  -2   6   12.90    6.10
 -30   2   6   11.60    5.90
 -30   2   6   17.30    6.40
 -28  -2   6   31.30    7.80
 -28   2   6   28.80    6.50
 -28   2   6   35.80    7.00
 -26  -2   6    3.30    5.80
 -26  -2   6    4.10    5.30
 -26   2   6   11.20    5.40
 -26   2   6    2.60    5.30
 -24  -2   6   -2.80    4.30
 -24  -2   6    5.70    5.10
 -24   2   6    1.70    4.60
 -24   2   6    0.00    4.90
 -22  -2   6   38.10    6.30
 -22   2   6   37.50    6.20
 -22   2   6   34.60    6.10
 -20  -2   6   15.90    5.20
 -20  -2   6   12.70    5.00
 -20  -2   6    9.70    3.70
 -20   2   6   14.20    4.90
 -20   2   6    9.20    4.70
 -18  -2   6   -7.30    3.00
 -18  -2   6    0.20    4.10
 -18  -2   6   -2.70    4.10
 -18   2   6   -0.50    3.70
 -18   2   6    5.40    4.20
  18   2  -6   -5.40    4.80
 -16  -2   6   28.50    5.40
 -16  -2   6   19.70    4.00
 -16  -2   6   24.20    4.30
 -16  -2   6   23.40    4.90
  16  -2  -6   24.30    3.80
  16   2  -6   27.90    4.90
 -16   2   6   26.80    4.90
 -16   2   6   27.80    4.60
  16   2  -6   22.90    4.90
 -14  -2   6   30.90    4.80
  14  -2  -6   24.60    3.60
  14  -2  -6   22.00    3.50
 -14  -2   6   23.90    4.00
  14  -2  -6   27.20    3.60
 -14  -2   6   24.30    4.80
  14  -2  -6   30.20    5.50
 -14  -2   6   23.30    4.20
 -14  -2   6   26.30    4.10
  14   2  -6   21.70    4.40
 -14   2   6   24.00    4.50
  14   2  -6   22.30    4.40
 -14   2   6   23.30    4.30
  12  -2  -6   34.10    3.90
 -12  -2   6   38.40    4.80
 -12  -2   6   35.70    4.80
 -12  -2   6   34.40    4.70
  12  -2  -6   43.50    4.60
 -12  -2   6   42.70    4.90
 -12  -2   6   42.90    4.80
  12  -2  -6   36.10    3.90
  12  -2  -6   33.30    3.80
  12  -2  -6   38.10    4.00
 -12  -2   6   39.40    4.10
 -12  -2   6   46.00    4.70
 -12   2   6   42.30    5.10
  12   2  -6   36.50    4.90
  12   2  -6   35.40    4.70
  10  -2  -6    0.70    2.10
 -10  -2   6    4.00    2.80
  10  -2  -6   -1.90    3.40
 -10  -2   6    0.00    2.40
 -10  -2   6    2.50    2.70
 -10  -2   6    2.70    2.50
  10  -2  -6    3.10    2.90
 -10  -2   6    3.50    3.00
 -10  -2   6    3.20    2.50
 -10  -2   6    3.50    3.00
  10  -2  -6    0.30    2.20
 -10   2   6    0.00    3.30
 -10   2   6    1.00    2.90
 -10   2   6    1.30    3.00
  10   2  -6    3.90    3.00
  10   2  -6    4.60    2.80
  -8  -2   6  231.78    8.80
  -8  -2   6  219.78    8.10
  -8  -2   6  234.28    9.30
   8  -2  -6  221.58    8.40
  -8  -2   6  239.08    9.50
   8  -2  -6  239.58    8.90
  -8  -2   6  231.98    9.00
  -8   2   6  220.38   10.20
   8   2  -6  226.08    9.30
  -8   2   6  234.78    9.50
   8   2  -6  227.58    9.00
  -8   2   6  230.28    9.10
  -6  -2   6   -2.10    2.60
  -6  -2   6   -0.40    2.00
   6  -2  -6    1.10    2.20
   6  -2  -6   -0.80    1.90
   6  -2  -6   -0.40    2.10
  -6  -2   6    1.60    2.80
   6  -2  -6    2.70    2.30
  -6  -2   6   -0.30    2.10
  -6  -2   6   -1.40    2.00
  -6  -2   6   -1.10    2.00
   6   2  -6   -0.40    2.20
   6   2  -6    0.90    2.30
  -6   2   6    2.40    2.60
  -6   2   6   -2.80    3.20
  -6   2   6   -0.80    2.60
  -4  -2   6   -1.30    2.60
   4  -2  -6    0.20    2.30
   4  -2  -6    0.50    2.30
  -4  -2   6    1.40    1.70
  -4  -2   6    0.90    2.70
  -4  -2   6   -2.00    1.90
   4  -2  -6    1.80    2.30
   4  -2  -6    0.40    2.30
  -4   2   6   -0.40    2.70
   4   2  -6    0.90    2.20
  -4   2   6   -1.90    2.80
   4   2  -6   -1.50    1.90
  -4   2   6    1.90    3.60
   2  -2  -6   26.20    3.50
   2  -2  -6   25.80    3.90
  -2  -2   6   22.30    2.30
  -2  -2   6   26.00    4.20
   2  -2  -6   32.00    3.80
  -2  -2   6   33.80    4.20
  -2  -2   6   27.80    2.70
   2  -2  -6   28.40    3.50
  -2   2   6   27.20    4.20
   2   2  -6   27.90    2.90
  -2   2   6   28.70    3.90
  -2   2   6   24.50    3.90
  -2   2   6   27.20    3.70
   2   2  -6   28.30    3.20
  -2   2   6   20.50    4.10
   0  -2  -6   96.89    5.70
   0  -2  -6   85.59    5.60
   0  -2  -6   84.69    5.40
   0  -2   6   82.99    6.30
   0  -2  -6   83.79    5.30
   0  -2  -6   87.29    5.80
   0  -2   6   75.49    5.50
   0   2  -6   84.89    4.30
   0   2   6   81.49    5.30
   0   2   6   88.79    6.40
   0   2  -6   92.09    4.20
   0   2   6   86.39    5.90
   0   2   6   84.59    6.40
   0   2   6   86.59    5.50
  -2  -2  -6   42.10    4.70
  -2  -2  -6   45.10    4.80
  -2  -2  -6   49.99    4.90
   2  -2   6   48.70    5.60
   2  -2   6   53.59    5.00
  -2  -2  -6   61.09    5.80
  -2  -2  -6   51.39    6.30
  -2   2  -6   47.10    3.30
  -2   2  -6   46.50    3.10
   2   2   6   45.20    5.20
   2   2   6   44.70    4.60
   2   2   6   50.59    4.70
   2   2   6   54.09    5.60
   2   2   6   48.40    5.60
  -4  -2  -6   85.19    6.10
  -4  -2  -6   90.89    6.20
  -4  -2  -6   91.69    5.80
   4  -2   6   89.19    6.70
  -4  -2  -6   78.79    5.90
   4  -2   6   90.89    6.20
  -4  -2  -6   92.69    6.00
  -4   2  -6   89.99    4.20
   4   2   6   80.79    6.70
   4   2   6   91.99    6.10
   4   2   6   87.79    6.10
   4   2   6   94.09    6.70
   4   2   6   94.89    6.80
  -6  -2  -6  250.97   10.80
  -6  -2  -6  247.78   10.40
  -6  -2  -6  231.38   13.80
  -6  -2  -6  252.87   10.60
   6  -2   6  252.97   10.20
  -6  -2  -6  248.88   10.60
   6   2   6  264.77   11.40
   6   2   6  258.37   10.50
   6   2   6  238.98   11.70
  -6   2  -6  255.97    8.30
   6   2   6  248.68   10.80
  -6   2  -6  254.27    8.30
  -8  -2  -6   21.10    4.60
  -8  -2  -6   11.30    5.80
  -8  -2  -6   13.10    4.30
  -8  -2  -6   25.40    4.70
  -8   2  -6   10.70    2.40
   8   2   6    8.30    4.70
   8   2   6   16.00    4.70
   8   2   6   23.10    4.30
  -8   2  -6   15.70    2.70
  -8   2  -6   16.10    4.20
   8   2   6   17.10    4.80
   8   2   6   16.80    4.50
 -10  -2  -6  313.37   13.10
 -10  -2  -6  313.27   13.40
 -10  -2  -6  332.97   13.40
  10   2   6  313.47   13.20
  10   2   6  313.17   13.00
 -10   2  -6  308.87   10.30
 -10   2  -6  319.37   10.70
  10   2   6  328.77   13.70
 -10   2  -6  304.67   11.50
 -10   2  -6  317.37   10.70
  10   2   6  318.47   13.80
 -12  -2  -6    4.70    4.20
 -12  -2  -6    5.70    4.70
 -12   2  -6   -1.80    3.20
  12   2   6    3.70    4.50
 -12   2  -6    3.30    3.10
 -12   2  -6    1.00    2.70
 -12   2  -6    4.80    2.90
  12   2   6    4.90    4.60
 -12   2  -6    4.80    2.60
  12   2   6    1.50    4.10
 -14  -2  -6   14.90    5.20
 -14  -2  -6   15.60    5.00
  14   2   6   16.90    4.90
 -14   2  -6   15.90    3.80
  14   2   6   19.60    5.60
 -14   2  -6   14.40    3.70
 -14   2  -6   15.00    3.30
 -14   2  -6   18.90    3.50
  14   2   6   16.50    5.60
 -16  -2  -6    8.30    4.80
 -16  -2  -6    0.20    4.60
 -16   2  -6    3.00    3.50
  16   2   6    2.10    5.10
 -16   2  -6    3.40    3.40
  16   2   6   -1.80    4.20
 -16   2  -6    1.10    2.80
 -16   2  -6    3.50    3.50
 -18  -2  -6   -0.80    4.90
 -18  -2  -6   19.20    5.20
 -18   2  -6    3.90    4.10
 -18   2  -6    5.60    3.30
  18   2   6   -0.20    4.90
 -18   2  -6   -2.10    3.50
  18   2   6    8.20    4.90
 -18   2  -6   -2.40    3.90
  18   2   6    9.20    6.30
 -20  -2  -6   66.39    8.60
 -20  -2  -6   56.49    8.50
 -20   2  -6   58.39    6.80
  20   2   6   54.49    7.70
 -20   2  -6   64.89    6.90
 -20   2  -6   55.09    5.80
 -22  -2  -6   -8.00    5.10
 -22  -2  -6   -1.40    5.40
 -22   2  -6    6.90    4.80
 -22   2  -6   -0.20    4.70
 -22   2  -6   14.10    5.20
 -24  -2  -6  108.39   12.30
 -24  -2  -6  100.39   11.70
 -24   2  -6   97.59    8.60
 -24   2  -6  124.39    9.50
 -26  -2  -6    6.30    6.60
 -26  -2  -6   15.40    6.80
 -26   2  -6   13.40    5.80
 -26   2  -6   11.70    6.10
 -29  -3   6    7.40    8.30
 -29  -3   6   14.40    6.80
 -29   3   6    3.50    5.40
 -29   3   6    6.80    6.90
 -27  -3   6    8.90    7.00
 -27  -3   6   16.50    6.70
 -27   3   6    2.80    4.80
 -27   3   6    8.60    5.40
 -25  -3   6   12.10    6.10
 -25  -3   6    8.70    5.90
 -25   3   6    9.20    5.20
 -25   3   6   11.10    5.40
 -23  -3   6   40.50    7.50
 -23  -3   6   29.30    6.30
 -23  -3   6   28.50    6.50
 -23  -3   6   43.60    6.00
 -23   3   6   33.60    6.40
 -23   3   6   23.50    6.40
 -21  -3   6   -7.40    4.50
 -21  -3   6   -1.00    4.40
 -21  -3   6    1.00    4.80
 -21  -3   6   -0.80    4.10
  21  -3  -6    4.70    3.10
 -21   3   6   -1.00    4.60
 -21   3   6    2.80    4.30
 -19  -3   6   42.10    6.10
 -19  -3   6   37.20    5.90
 -19  -3   6   39.60    6.30
  19  -3  -6   44.70    5.40
 -19  -3   6   59.29    7.50
 -19   3   6   47.90    6.40
  19   3  -6   56.69    7.30
 -19   3   6   35.50    5.90
  17  -3  -6   61.19    6.40
 -17  -3   6   57.29    7.60
 -17  -3   6   63.99    7.00
 -17  -3   6   64.99    7.70
 -17  -3   6   55.99    6.50
  17   3  -6   77.69    8.60
 -17   3   6   66.79    7.10
 -17   3   6   69.19    7.30
  15  -3  -6  101.79    7.20
 -15  -3   6   78.29    7.70
 -15  -3   6   75.19    7.30
 -15  -3   6   73.29    7.00
 -15  -3   6   88.89    7.70
 -15  -3   6   81.59    7.10
 -15   3   6   93.19    7.40
 -15   3   6   84.69    9.10
  15   3  -6   83.89    7.90
 -15   3   6   86.59    7.00
  15   3  -6   70.89    7.50
  13  -3  -6    3.30    2.00
 -13  -3   6   -2.10    3.80
 -13  -3   6    2.80    3.50
 -13  -3   6    1.90    3.20
  13  -3  -6   -0.40    3.60
 -13  -3   6    6.00    4.30
 -13   3   6    0.60    4.80
 -13   3   6    0.50    3.60
  13   3  -6    4.30    3.90
 -13   3   6    2.20    3.70
  13   3  -6    9.60    4.30
 -11  -3   6   31.20    4.40
  11  -3  -6   40.70    5.70
  11  -3  -6   36.70    3.70
 -11  -3   6   34.30    5.60
 -11  -3   6   44.20    6.10
 -11  -3   6   42.90    4.90
  11  -3  -6   33.10    3.60
 -11   3   6   30.70    5.10
  11   3  -6   36.60    4.90
 -11   3   6   25.00    5.90
  11   3  -6   43.70    5.40
 -11   3   6   38.70    5.20
  11   3  -6   46.50    5.50
  -9  -3   6   27.80    3.80
   9  -3  -6   12.10    4.40
  -9  -3   6   20.00    3.70
  -9  -3   6   26.60    5.60
  -9  -3   6   23.10    5.10
   9  -3  -6   22.20    3.40
   9  -3  -6   22.30    5.00
   9  -3  -6   26.40    3.30
  -9  -3   6   18.00    3.70
   9   3  -6   18.20    4.70
  -9   3   6   13.00    4.70
  -9   3   6   17.40    5.50
   9   3  -6   20.10    4.10
   9   3  -6   18.70    4.30
  -9   3   6   11.10    4.20
  -7  -3   6   62.09    6.20
   7  -3  -6   80.49    7.40
   7  -3  -6   51.29    4.50
  -7  -3   6   49.40    4.20
   7  -3  -6   51.79    4.40
  -7  -3   6   69.29    6.80
  -7  -3   6   52.19    4.50
   7   3  -6   58.49    5.60
   7   3  -6   54.29    5.20
  -7   3   6   59.89    5.80
  -7   3   6   57.69    6.10
   7   3  -6   50.89    5.20
  -7   3   6   71.59    8.00
  -5  -3   6   10.30    4.00
   5  -3  -6   13.40    3.10
   5  -3  -6   22.40    3.70
   5  -3  -6    8.00    4.60
  -5  -3   6   14.20    4.40
  -5  -3   6   14.70    2.40
   5  -3  -6   16.90    3.60
  -5  -3   6   13.60    2.10
  -5   3   6    6.90    3.70
  -5   3   6   14.20    5.00
   5   3  -6   11.70    3.20
   5   3  -6    9.40    3.30
  -5   3   6   10.90    4.30
   3  -3  -6  146.49    7.50
  -3  -3   6  156.38    9.20
   3  -3  -6  142.19    7.20
   3  -3  -6  153.08    7.10
  -3  -3   6  139.49    8.40
  -3   3   6  149.19    8.60
  -3   3   6  144.39    7.70
   3   3  -6  139.99    7.00
  -3   3   6  145.89    7.80
   3   3  -6  141.99    6.80
  -3   3   6  152.38    9.30
  -3   3   6  157.88    8.40
  -1  -3   6   68.39    6.80
   1  -3  -6   80.29    5.80
  -1  -3   6   86.99    7.80
  -1   3   6   80.39    6.20
   1   3  -6   81.69    4.60
  -1   3   6   73.19    6.10
   1   3  -6   69.19    4.90
  -1   3   6   70.09    7.40
  -1   3   6   76.89    6.80
  -1   3   6   87.99    7.30
  -1  -3  -6   25.40    4.40
  -1  -3  -6   19.20    4.00
   1  -3   6   18.70    5.20
   1  -3   6   20.20    4.70
   1   3   6   23.80    4.70
   1   3   6   14.50    5.20
  -1   3  -6   22.10    3.00
   1   3   6   21.30    4.90
   1   3   6   21.70    4.30
   1   3   6   21.00    4.30
   3  -3   6  123.39    8.10
   3  -3   6  113.19    8.80
  -3  -3  -6  129.39    7.80
  -3  -3  -6  129.29    7.50
   3   3   6  120.09    8.70
   3   3   6  135.59    8.10
   3   3   6  117.79    9.00
   3   3   6  118.69    7.60
   3   3   6  124.09    8.30
   5  -3   6  147.59    8.60
  -5  -3  -6  155.58    8.90
   5  -3   6  149.88    9.60
  -5  -3  -6  153.28    8.50
   5   3   6  132.09   10.70
   5   3   6  150.48    8.90
   5   3   6  147.09    9.70
   5   3   6  141.09    9.40
   5   3   6  153.08    9.20
   7  -3   6    0.00    4.00
  -7  -3  -6   -1.90    3.80
  -7  -3  -6   -4.30    3.80
   7  -3   6   -2.60    4.40
   7   3   6   -4.80    3.70
   7   3   6    4.90    4.00
   7   3   6    2.00    4.60
  -7   3  -6   -4.60    3.00
   7   3   6   -6.40    3.90
   7   3   6   -4.30    4.30
  -9  -3  -6  133.49    8.80
   9  -3   6  138.99    9.90
   9  -3   6  139.69    8.90
  -9  -3  -6  126.79    9.20
   9   3   6  126.79    9.90
   9   3   6  137.79   10.10
   9   3   6  126.89    9.20
   9   3   6  151.68   12.30
 -11  -3  -6    2.30    4.40
 -11  -3  -6    0.80    4.10
  11   3   6    4.90    5.30
  11   3   6   -3.20    4.30
  11   3   6   11.40    6.20
 -13  -3  -6   54.69    7.50
 -13  -3  -6   37.50    6.60
  13   3   6   44.10    6.70
  13   3   6   22.60    6.20
  13   3   6   37.60    7.00
 -15  -3  -6   40.80    6.60
 -15  -3  -6   45.30    7.90
  15   3   6   30.00    6.80
  15   3   6   40.90    8.40
  15   3   6   33.10    7.10
 -17  -3  -6    0.70    5.50
 -17  -3  -6   -2.00    4.90
  17   3   6    4.60    5.20
  17   3   6   -4.10    5.80
  17   3   6    1.90    5.70
 -19  -3  -6   36.90    8.00
 -19  -3  -6   34.60    7.60
  19   3   6   33.00    8.90
 -19   3  -6   28.20    4.40
  19   3   6   40.20    8.30
 -19   3  -6   37.50    4.70
 -21  -3  -6  -10.30    6.10
 -21  -3  -6   -1.80    6.20
 -21   3  -6    2.40    3.60
 -21   3  -6   16.20    3.50
 -23  -3  -6   16.70    7.60
 -23  -3  -6    4.00    6.00
 -23   3  -6   -5.00    3.80
 -25  -3  -6    7.00    6.20
 -26  -4   6   12.60    7.50
 -26  -4   6    6.70    6.70
 -26   4   6    3.70    9.40
 -26   4   6    5.30    5.10
 -26   4   6   13.20    6.20
 -24  -4   6   61.89    9.20
 -24  -4   6   37.50    7.40
 -24  -4   6   54.29    7.20
 -24   4   6   31.80    6.30
 -24   4   6   31.60    9.30
 -24   4   6   28.20    6.00
 -22  -4   6    5.90    5.40
 -22  -4   6   -6.60    5.00
  22  -4  -6   -0.20    4.90
 -22  -4   6    6.00    4.90
 -22   4   6   -2.40    6.70
 -22   4   6    3.90    4.30
 -22   4   6    3.90    4.60
 -20  -4   6    6.20    4.60
  20  -4  -6    6.20    5.00
 -20  -4   6   -3.10    6.20
 -20  -4   6   10.10    5.20
 -20  -4   6  -10.70    4.70
 -20   4   6   13.40    4.90
 -20   4   6    3.40    4.10
 -20   4   6   10.30    7.60
 -18  -4   6   38.90    7.30
 -18  -4   6   35.90    5.90
 -18  -4   6   50.29    7.80
  18  -4  -6   51.19    7.10
 -18  -4   6   38.60    5.60
 -18   4   6   45.40    8.50
 -18   4   6   46.20    6.50
 -16  -4   6   -2.90    5.10
 -16  -4   6    8.90    6.10
 -16  -4   6    2.60    5.50
 -16  -4   6    6.60    3.50
  16  -4  -6   -0.50    4.30
 -16   4   6    7.20    7.70
 -16   4   6    2.30    4.20
 -14  -4   6   96.69    6.90
 -14  -4   6  108.59    9.90
  14  -4  -6  127.19    9.60
 -14  -4   6   96.89    7.30
 -14  -4   6  109.79   10.00
 -14   4   6  117.09    8.30
 -14   4   6  121.39   10.90
 -14   4   6  113.49    8.30
  14   4  -6  129.99    9.60
  14   4  -6  131.19   10.00
  12  -4  -6    8.10    5.00
 -12  -4   6    9.10    2.90
 -12  -4   6    3.10    5.30
 -12  -4   6    0.30    4.80
  12   4  -6    7.80    4.70
 -12   4   6    0.80    4.10
 -12   4   6   -6.10    5.30
  12   4  -6   13.20    4.90
 -12   4   6    0.80    4.10
  12   4  -6    4.60    4.30
 -10  -4   6   -4.10    4.50
 -10  -4   6    6.00    2.60
  10  -4  -6    8.00    3.30
 -10  -4   6    8.20    5.60
 -10  -4   6    4.40    3.10
  10  -4  -6    3.20    4.50
 -10  -4   6    3.30    4.50
  10   4  -6    5.40    4.20
 -10   4   6    7.10    4.70
  10   4  -6    5.80    4.10
 -10   4   6   12.80    6.60
 -10   4   6    8.10    4.40
   8  -4  -6  126.29    9.80
   8  -4  -6  116.69    7.00
  -8  -4   6  109.59    9.20
  -8  -4   6  128.99   10.10
   8   4  -6  128.29    8.00
  -8   4   6   97.59    9.90
  -8   4   6  105.19    8.40
  -8   4   6  108.49    8.20
   8   4  -6  119.69    7.80
   8   4  -6  108.59    7.80
   6  -4  -6  106.89    7.00
   6  -4  -6   93.09   10.20
   6  -4  -6   88.89    7.10
  -6  -4   6   99.59    9.00
  -6  -4   6   87.19    9.20
  -6   4   6   94.59    9.40
   6   4  -6  100.19    9.80
   6   4  -6   97.89    6.70
  -6   4   6   84.09    8.00
  -6   4   6   91.49    8.40
   4  -4  -6  669.63   20.50
  -4  -4   6  726.93   23.60
   4  -4  -6  659.43   20.40
  -4  -4   6  663.53   24.20
   4  -4  -6  682.93   21.50
   4   4  -6  665.83   20.80
  -4   4   6  622.64   24.00
  -4   4   6  687.63   22.70
   4   4  -6  695.83   21.40
  -4   4   6  690.23   23.40
   4   4  -6  662.73   20.80
   2  -4  -6  201.88    9.30
  -2  -4   6  213.78   12.30
  -2  -4   6  204.68   11.30
   2  -4  -6  204.08    9.80
   2  -4  -6  199.18   12.80
  -2   4   6  195.58    9.70
   2   4  -6  189.98    8.70
  -2   4   6  204.98   11.10
  -2   4   6  191.28    9.80
  -2   4   6  195.18   12.10
  -2   4   6  199.68   11.20
   2   4  -6  187.08    8.20
   0  -4   6   57.29    7.30
   0  -4  -6   71.19    8.60
   0  -4  -6   61.79    6.20
   0  -4  -6   66.99    6.60
   0  -4   6   58.79    8.20
   0   4  -6   61.29    5.10
   0   4   6   60.99    7.60
   0   4   6   59.29    6.70
   0   4   6   49.70    6.90
   0   4   6   62.09    8.50
   2  -4   6    1.70    4.70
   2  -4   6   -7.30    4.50
  -2  -4  -6    2.70    3.50
  -2  -4  -6    1.40    5.40
  -2  -4  -6    1.30    3.40
   2   4   6    5.90    4.60
   2   4   6    3.60    4.90
   2   4   6    0.70    5.30
   2   4   6    3.70    4.30
   2   4   6   -0.10    4.00
   4  -4   6   29.60    6.30
   4  -4   6   28.50    6.70
  -4  -4  -6   34.10    8.10
  -4  -4  -6   27.30    4.90
   4   4   6   23.50    5.90
   4   4   6   27.20    6.60
  -4   4  -6   31.00    4.40
   4   4   6   38.00    5.70
   4   4   6   43.40    6.60
   4   4   6   23.10    6.80
  -6  -4  -6   13.20    6.00
   6  -4   6   14.50    5.60
   6  -4   6    9.90    6.50
  -6  -4  -6   11.00    4.70
   6   4   6    9.90    6.10
   6   4   6   10.60    5.60
   6   4   6    2.10    5.30
   6   4   6    8.90    5.30
   8  -4   6   28.30    6.10
  -8  -4  -6   26.40    7.00
  -8  -4  -6   32.50    6.40
   8  -4   6   28.20    7.20
  -8  -4  -6   35.60    6.10
   8   4   6   26.30    6.30
   8   4   6   43.00   12.10
   8   4   6   36.10    7.60
   8   4   6   36.00    7.60
  -8   4  -6   34.80    7.40
  10  -4   6   -0.30    4.50
 -10  -4  -6   -8.40    4.20
 -10  -4  -6   -6.50    5.80
  10  -4   6    1.10    5.60
 -10   4  -6    0.30    4.10
  10   4   6   -6.30    5.50
 -12  -4  -6  -12.50    4.10
 -12  -4  -6   -1.20    5.40
 -12  -4  -6    4.80    4.60
  12   4   6   11.50    7.70
  12   4   6   -3.40    4.90
  12   4   6   -2.80    6.10
 -12   4  -6   -2.10    3.90
 -14  -4  -6   -0.50    4.90
 -14  -4  -6    0.80    6.10
 -14  -4  -6    3.30    5.80
 -14   4  -6    1.00    4.90
  14   4   6    3.30    5.60
  14   4   6    1.30    5.70
  14   4   6    9.90    6.20
 -16  -4  -6   17.20    7.30
 -16  -4  -6    6.10    6.30
 -16  -4  -6   15.80    6.40
  16   4   6    8.20    6.90
  16   4   6    3.00    6.30
  16   4   6   16.10    7.50
 -16   4  -6    8.30    5.40
 -18  -4  -6   50.49    8.70
 -18  -4  -6    0.60    6.90
 -18  -4  -6   17.60    7.70
  18   4   6   31.30    8.30
  18   4   6   23.80    7.50
 -18   4  -6   19.00    8.40
  18   4   6   33.00    7.40
 -20  -4  -6   -8.30    6.30
 -20  -4  -6   -2.10   12.30
 -20  -4  -6    7.50    7.20
  20   4   6    0.80   11.20
 -20   4  -6    0.50    6.60
 -19  -5   6   -5.30    6.40
  19  -5  -6   12.40    6.40
 -19  -5   6    3.60    6.40
 -19   5   6   -5.20    4.70
 -17  -5   6   10.60    7.20
  17  -5  -6    9.90    6.30
 -17  -5   6   -0.10    6.10
 -17   5   6    2.10    6.70
 -17   5   6    6.10    4.60
 -17   5   6    9.30    4.50
  15  -5  -6   12.10    6.50
 -15  -5   6    9.70    7.70
 -15  -5   6    7.80    6.70
 -15   5   6    9.20    7.10
 -15   5   6    5.10    4.70
 -15   5   6    1.00    4.00
  13  -5  -6    4.90    3.60
 -13  -5   6   -4.30    6.50
 -13  -5   6    6.90    6.50
  13  -5  -6    0.40    6.00
 -13   5   6    3.50    4.80
 -13   5   6   -2.30    4.30
  13   5  -6   -0.70    5.80
 -13   5   6    9.20    7.10
 -11  -5   6   15.00    7.20
 -11  -5   6   24.60    7.10
  11  -5  -6   14.90    4.30
  11  -5  -6   18.00    7.10
 -11   5   6   29.20    7.80
  11   5  -6   15.50    5.70
 -11   5   6   21.30    5.40
 -11   5   6   14.60    5.50
   9  -5  -6   40.00    5.70
   9  -5  -6   33.80    8.40
  -9  -5   6   48.00    9.50
  -9  -5   6   39.40    8.30
  -9   5   6   35.50    6.00
   9   5  -6   52.29    6.90
  -9   5   6   35.30    8.00
  -9   5   6   32.50    6.60
  -7  -5   6   24.40    7.30
   7  -5  -6   24.80    5.20
  -7  -5   6   33.10    8.10
   7  -5  -6   25.70    6.90
   7   5  -6   27.40    5.50
  -7   5   6   20.40    7.00
  -7   5   6   26.50    6.00
   7   5  -6   30.40    5.70
  -7   5   6   17.40    6.10
  -5  -5   6   23.40    7.20
  -5  -5   6   32.50    7.40
   5  -5  -6   25.60    4.90
   5  -5  -6   30.90    7.30
  -5   5   6   24.30    5.70
  -5   5   6   20.90    6.30
  -5   5   6   20.50    7.30
   5   5  -6   29.50    5.40
  -3  -5   6   -2.20    6.10
   3  -5  -6    4.60    5.80
  -3  -5   6   13.40    6.60
   3  -5  -6    3.30    4.20
   3   5  -6    6.00    3.90
  -3   5   6    7.60    5.90
  -3   5   6    6.20    5.20
  -3   5   6    6.40    6.50
   3   5  -6   -7.00    3.40
   1  -5  -6   54.69    9.40
  -1  -5   6   54.09    8.50
  -1  -5   6   55.99    9.70
   1  -5  -6   49.70    6.80
  -1   5   6   41.90    7.40
  -1   5   6   42.20    7.20
  -1   5   6   49.80    8.90
   1  -5   6   12.10    6.70
   1  -5   6    7.00    6.80
  -1  -5  -6    4.10    6.40
  -1  -5  -6   10.80    4.60
   1   5   6   17.60    6.90
   1   5   6    8.50    5.80
   1   5   6   10.40    5.80
  -3  -5  -6    7.60    7.30
   3  -5   6   -5.90    5.10
   3  -5   6   -3.20    5.60
  -3  -5  -6    3.40    5.00
   3   5   6    0.80    4.90
   3   5   6    5.20    5.70
   3   5   6    1.00    6.20
   5  -5   6   26.60    6.60
   5  -5   6   25.70    8.50
  -5  -5  -6   17.00    7.70
  -5  -5  -6   23.70    6.50
   5   5   6   44.80    7.80
   5   5   6   33.60    7.90
   5   5   6   27.40    6.80
   7  -5   6    7.00    5.70
   7  -5   6   -2.70    6.30
  -7  -5  -6    7.60    7.30
  -7  -5  -6    6.20    5.30
   7   5   6    4.00    6.20
   7   5   6    3.20    5.70
   7   5   6    3.10    6.30
   9  -5   6    7.10    7.20
  -9  -5  -6   -4.20    5.40
  -9  -5  -6   -3.20    5.70
   9  -5   6    8.60    6.50
   9   5   6   -0.90    5.80
  -9   5  -6   19.20    5.10
   9   5   6    3.10    6.40
   9   5   6   -3.00    5.80
 -11  -5  -6   15.20    7.40
  11  -5   6    7.30    7.30
  11   5   6   -7.80    7.00
 -11   5  -6   -3.80    5.30
  11   5   6  -14.80    5.20
  11   5   6    4.10    6.00
 -13   5  -6    7.20    6.50
  13   5   6   14.60    6.80
  13   5   6    2.20    8.80
 -34   0   7   -4.80    6.60
 -32   0   7  -10.10    4.90
 -32   0   7   -0.30    5.70
 -30   0   7   -4.30    5.40
 -30   0   7   12.90    6.40
 -28   0   7   -0.50    5.50
 -28   0   7   -1.10    6.90
 -26   0   7   -7.30    5.00
 -26   0   7   -1.30    5.10
 -24   0   7    2.20    4.90
 -24   0   7    1.30    5.00
 -24   0   7    7.00    4.40
 -22   0   7   13.70    4.80
 -22   0   7    7.90    4.80
 -20   0   7    5.40    4.30
 -20   0   7    3.20    4.20
 -18   0   7   -0.50    3.80
 -18   0   7   -4.70    3.50
  16   0  -7    1.30    2.50
 -16   0   7   -0.70    3.40
  16   0  -7    4.00    2.70
 -16   0   7   -3.50    2.80
  14   0  -7    3.10    2.70
 -14   0   7   -0.50    2.90
  14   0  -7    6.60    2.80
 -14   0   7    2.20    3.30
  12   0  -7    0.40    2.30
  12   0  -7   -1.20    2.80
 -12   0   7    4.10    3.00
 -12   0   7   -2.20    2.90
  10   0  -7   -2.00    2.30
  10   0  -7   -2.10    2.20
 -10   0   7    0.80    2.80
  10   0  -7    0.00    1.70
 -10   0   7    1.00    2.70
   8   0  -7    0.00    2.30
  -8   0   7   -3.50    2.40
   8   0  -7    0.10    2.10
  -8   0   7    0.20    2.60
   6   0  -7   -1.70    2.50
  -6   0   7   -1.30    2.50
   6   0  -7   -1.50    2.10
  -6   0   7    0.20    2.60
  -4   0   7    4.20    2.50
   4   0  -7   -1.80    2.30
   4   0  -7    1.10    2.30
  -4   0   7    1.60    2.10
   4   0  -7   -1.40    1.50
  -4   0   7    0.40    2.20
   2   0  -7    0.80    1.80
  -2   0   7    2.90    2.50
   2   0  -7    0.80    2.50
  -2   0   7    0.80    2.00
   2   0  -7   -1.00    2.20
  -2   0   7    1.30    2.50
   0   0  -7   -2.50    2.00
   0   0  -7    2.20    2.30
   0   0  -7   -0.20    2.20
   0   0   7    0.80    2.10
   0   0  -7   -1.30    2.10
   0   0   7   -0.60    2.20
   0   0  -7   -1.40    2.10
   0   0   7   -2.40    2.20
   0   0  -7    1.40    1.80
  -2   0  -7   -1.00    1.90
  -2   0  -7   -0.70    2.20
   2   0   7   -0.90    2.20
   2   0   7   -2.00    2.20
  -2   0  -7    0.70    1.90
  -2   0  -7   -0.90    2.10
  -2   0  -7   -0.40    2.30
  -2   0  -7   -1.80    2.20
   4   0   7   -2.60    2.10
   4   0   7   -0.60    2.40
  -4   0  -7    0.70    2.40
  -4   0  -7   -2.90    2.10
   4   0   7   -1.80    2.10
  -4   0  -7    0.50    2.20
  -4   0  -7    1.10    2.30
  -4   0  -7   -2.00    2.40
  -6   0  -7   -0.60    2.40
   6   0   7   -2.00    2.30
   6   0   7    4.30    2.30
   6   0   7   -1.20    2.10
  -6   0  -7   -2.60    2.50
   6   0   7   -0.40    2.30
  -6   0  -7   -2.90    2.30
  -6   0  -7    0.70    2.50
  -6   0  -7    0.20    2.80
   6   0   7    0.80    2.60
  -8   0  -7   -2.30    2.50
  -8   0  -7   -1.50    2.70
  -8   0  -7   -1.60    2.50
   8   0   7    0.80    2.20
   8   0   7   -3.50    3.10
   8   0   7    0.20    2.60
   8   0   7    0.10    2.40
   8   0   7    0.40    2.10
  -8   0  -7    0.50    2.70
  -8   0  -7   -0.40    2.80
  10   0   7    2.60    2.60
 -10   0  -7    0.60    3.10
 -10   0  -7    0.50    3.10
 -10   0  -7    1.20    3.00
  10   0   7    0.60    2.80
  10   0   7    0.50    2.40
 -10   0  -7    2.20    3.00
  10   0   7   -0.90    2.70
 -12   0  -7    4.40    3.60
 -12   0  -7   -1.40    3.30
 -12   0  -7   -1.60    3.40
  12   0   7   -0.50    3.10
  12   0   7   -4.30    2.90
 -12   0  -7    6.40    3.40
 -12   0  -7   -1.30    2.90
 -14   0  -7   -3.50    3.60
  14   0   7   -0.10    3.10
  14   0   7   -1.40    3.30
 -14   0  -7   -1.30    3.80
 -16   0  -7    5.00    3.90
 -16   0  -7   -1.90    3.90
 -16   0  -7    6.00    4.50
 -16   0  -7   -0.50    3.90
 -18   0  -7    7.10    4.80
 -18   0  -7   -4.70    4.00
 -18   0  -7    0.20    4.80
 -18   0  -7    0.80    4.50
 -20   0  -7   -0.30    4.80
 -20   0  -7    4.60    5.00
 -20   0  -7  -21.70    8.40
 -20   0  -7   -0.70    4.80
 -22   0  -7    1.00    5.10
 -22   0  -7    1.10    5.30
 -24   0  -7   -5.10    5.30
 -24   0  -7    0.40    5.90
 -26   0  -7    2.70    5.80
 -26   0  -7    7.30    6.30
 -28   0  -7    6.90    7.10
 -28   0  -7   -2.20    6.20
 -33  -1   7   44.20    8.30
 -33  -1   7   28.90    7.90
 -33   1   7   41.30    8.20
 -33   1   7   42.40    8.60
 -31  -1   7   45.40    8.30
 -31  -1   7   32.60    8.40
 -31   1   7   45.00    8.00
 -31   1   7   35.60    7.60
 -29  -1   7   12.70    6.00
 -29  -1   7   19.50    6.70
 -29   1   7   16.20    6.60
 -29   1   7    0.00    5.40
 -27  -1   7   -3.40    5.40
 -27  -1   7    6.00    5.70
 -27   1   7   -4.60    5.30
 -27   1   7    5.80    5.50
 -27   1   7   -9.70    6.10
 -25  -1   7    4.50    5.30
 -25  -1   7   18.40    6.00
 -25   1   7    5.20    5.50
 -25   1   7    8.60    5.30
 -23  -1   7    0.00    4.70
 -23  -1   7   -2.60    4.60
 -23   1   7   -2.10    4.70
 -23   1   7    0.80    4.60
 -21  -1   7  351.96   16.20
 -21  -1   7  354.86   15.50
 -21   1   7  403.96   15.20
 -21   1   7  382.86   15.50
 -19   1   7    0.90    4.00
 -19   1   7    2.20    4.30
 -17  -1   7   84.49    7.50
 -17  -1   7  105.39    7.40
 -17  -1   7   87.89    7.30
  17   1  -7   80.29    6.60
 -17   1   7   94.79    7.50
  17   1  -7   92.19   10.60
 -17   1   7  100.29    7.20
 -15  -1   7   56.99    5.60
 -15  -1   7   55.99    5.90
 -15  -1   7   55.99    6.10
  15  -1  -7   51.59    4.90
  15  -1  -7   52.89    4.80
 -15   1   7   49.10    5.70
  15   1  -7   46.70    6.00
 -15   1   7   53.09    8.80
  15   1  -7   44.70    5.20
  13  -1  -7   37.50    5.40
 -13  -1   7   26.70    4.60
 -13  -1   7   36.10    4.10
 -13  -1   7   31.60    4.60
  13  -1  -7   28.40    3.80
 -13  -1   7   30.00    3.50
  13   1  -7   35.70    4.60
 -13   1   7   24.30    4.10
  13   1  -7   34.00    3.60
 -13   1   7   25.30    4.40
  13   1  -7   28.30    3.90
  11  -1  -7  269.97   10.20
 -11  -1   7  266.87   10.70
 -11  -1   7  285.27    9.70
 -11  -1   7  265.77    9.30
 -11  -1   7  269.17   10.40
  11  -1  -7  280.07   10.00
 -11   1   7  275.97   10.90
 -11   1   7  273.27   10.50
  11   1  -7  260.87   10.20
  11   1  -7  271.37   10.60
  -9  -1   7  159.78    7.30
   9  -1  -7  167.38    7.00
  -9  -1   7  165.98    6.40
  -9  -1   7  159.18    7.50
  -9  -1   7  162.18    6.40
   9  -1  -7  170.48    7.40
  -9   1   7  156.58    7.50
   9   1  -7  157.18    6.70
   9   1  -7  158.98    7.50
  -9   1   7  169.08    8.00
   9   1  -7  156.08    7.10
   7  -1  -7    0.00    2.10
  -7  -1   7    3.30    2.60
  -7  -1   7    3.70    2.30
  -7   1   7    3.50    2.80
   7   1  -7    1.00    2.60
  -7   1   7    1.40    2.50
   7   1  -7    3.10    2.40
   7   1  -7    5.00    2.20
  -7   1   7    2.70    2.80
   5  -1  -7   40.90    4.10
   5  -1  -7   42.10    4.30
  -5  -1   7   34.00    3.80
  -5  -1   7   37.10    3.50
   5  -1  -7   42.20    4.10
  -5  -1   7   34.60    3.80
   5  -1  -7   35.90    3.80
  -5   1   7   41.20    4.40
  -5   1   7   40.60    4.10
   5   1  -7   38.70    3.80
   5   1  -7   36.40    3.60
   5   1  -7   36.70    3.90
  -5   1   7   35.20    3.90
   5   1  -7   36.90    3.10
   3  -1  -7   24.80    3.60
   3  -1  -7   22.90    3.40
   3  -1  -7   18.80    3.30
   3  -1  -7   20.10    3.50
  -3  -1   7   18.50    3.40
  -3  -1   7   25.90    3.20
   3   1  -7   20.10    3.10
  -3   1   7   19.60    3.50
  -3   1   7   23.30    3.80
  -3   1   7   24.70    3.70
   3   1  -7   17.10    2.90
  -1  -1   7  669.83   19.00
   1  -1  -7  658.03   19.80
   1  -1  -7  658.53   20.20
   1  -1  -7  659.03   19.90
  -1  -1   7  681.53   19.40
   1  -1  -7  662.43   20.10
   1  -1  -7  663.23   19.80
  -1  -1   7  657.93   19.20
   1   1  -7  656.63   19.20
  -1   1   7  653.73   20.00
  -1   1   7  662.63   19.90
   1   1  -7  640.14   19.20
  -1   1   7  666.53   20.40
   1   1  -7  662.03   19.40
   1  -1   7  176.88    6.60
  -1  -1  -7  174.48    7.50
   1  -1   7  171.38    7.20
  -1  -1  -7  173.88    7.70
   1  -1   7  174.58    6.40
  -1  -1  -7  182.28    7.80
  -1  -1  -7  174.28    7.60
  -1  -1  -7  180.38    8.00
  -1   1  -7  169.18    6.90
   1   1   7  181.68    8.00
  -1   1  -7  178.88    7.10
   1   1   7  181.08    7.60
  -1   1  -7  190.88    6.90
   1   1   7  187.38    8.20
   1   1   7  179.08    7.90
   1   1   7  188.88    7.80
  -3  -1  -7   76.29    5.40
   3  -1   7   81.99    4.10
  -3  -1  -7   64.49    5.30
  -3  -1  -7   72.59    5.40
  -3  -1  -7   75.09    5.30
  -3  -1  -7   75.29    5.10
   3   1   7   71.49    5.50
   3   1   7   76.59    5.70
  -3   1  -7   80.09    4.60
  -3   1  -7   77.69    4.70
   3   1   7   73.49    5.20
   3   1   7   76.89    5.20
  -3   1  -7   83.39    4.50
   3   1   7   77.19    5.70
  -3   1  -7   77.09    4.50
  -5  -1  -7    5.80    2.80
  -5  -1  -7   -0.90    2.60
   5  -1   7   -0.90    1.80
  -5  -1  -7   -1.90    2.50
  -5  -1  -7   -0.70    2.70
   5   1   7   -0.10    2.50
   5   1   7    3.50    2.80
   5   1   7   -0.80    2.70
  -5   1  -7   -1.10    2.30
  -5   1  -7   -0.70    2.20
  -5   1  -7    1.30    2.30
   5   1   7    3.00    3.20
  -5   1  -7   -0.60    2.10
   5   1   7    4.20    3.10
  -5   1  -7    0.70    2.20
  -7  -1  -7   54.09    5.50
  -7  -1  -7   57.49    5.50
   7  -1   7   54.29    3.80
  -7  -1  -7   61.09    5.60
  -7  -1  -7   55.59    4.90
  -7  -1  -7   63.59    5.80
   7   1   7   57.59    5.80
  -7   1  -7   53.29    4.50
  -7   1  -7   61.09    4.50
   7   1   7   55.69    5.10
  -7   1  -7   56.39    4.70
   7   1   7   62.09    5.50
   7   1   7   53.19    5.00
   7   1   7   59.19    5.80
  -7   1  -7   55.89    4.40
  -7   1  -7   59.59    4.50
  -9  -1  -7  293.37   11.70
  -9  -1  -7  288.97   12.10
  -9  -1  -7  307.57   12.20
  -9  -1  -7  284.87   11.80
  -9  -1  -7  289.17   12.20
   9  -1   7  291.07    9.90
   9   1   7  288.97   11.70
  -9   1  -7  312.57   11.50
   9   1   7  298.17   12.30
  -9   1  -7  258.07   12.20
  -9   1  -7  313.27   11.10
  -9   1  -7  310.87   11.20
   9   1   7  294.27   12.20
   9   1   7  291.57   11.80
   9   1   7  311.17   11.60
  -9   1  -7  317.27   10.80
 -11  -1  -7  565.74   18.70
  11   1   7  531.65   18.90
  11   1   7  558.14   19.10
 -11   1  -7  483.65   17.30
  11   1   7  560.14   18.60
 -11   1  -7  527.25   17.20
 -11   1  -7  533.25   17.50
 -11   1  -7  531.25   17.60
 -11   1  -7  544.35   17.20
 -13  -1  -7   22.40    4.90
 -13  -1  -7   23.20    5.00
 -13  -1  -7   35.60    5.40
 -13  -1  -7   20.80    5.00
  13   1   7   23.00    5.10
 -13   1  -7   20.50    4.20
 -13   1  -7   20.40    4.40
 -13   1  -7   21.30    4.20
 -13   1  -7   16.70    4.10
  13   1   7   13.60    5.10
  13   1   7   20.40    4.90
 -13   1  -7   18.20    4.00
 -15  -1  -7    3.50    4.00
 -15  -1  -7    7.30    4.30
 -15  -1  -7    1.30    4.10
 -15   1  -7    1.50    3.80
  15   1   7   -0.20    3.70
 -15   1  -7   -0.40    3.80
 -15   1  -7    3.60    3.90
 -15   1  -7    2.80    3.40
  15   1   7   -4.80    3.70
 -17  -1  -7   49.30    7.60
 -17  -1  -7   68.69    7.70
 -17  -1  -7   80.59    8.70
  17   1   7   64.59    7.20
 -17   1  -7   64.09    7.10
  17   1   7   70.99    7.40
 -17   1  -7   62.09    7.10
 -17   1  -7   68.79    6.70
 -17   1  -7   69.39    6.90
 -19  -1  -7   16.30    5.90
 -19  -1  -7   13.60    5.80
 -19   1  -7   17.40    5.00
 -19   1  -7   15.70    5.40
 -19   1  -7   14.10    4.80
  19   1   7   15.10    4.40
 -19   1  -7   21.30    5.80
 -21  -1  -7   50.79   10.80
 -21  -1  -7   40.50    7.50
 -21   1  -7   37.80    6.50
 -21   1  -7   42.50    8.10
 -21   1  -7   44.70    7.20
 -23  -1  -7   29.80    7.20
 -23  -1  -7   38.00    7.70
 -23   1  -7   43.40    7.50
 -23   1  -7   46.90    7.70
 -25  -1  -7   -7.70    6.30
 -25  -1  -7   14.90    7.50
 -25   1  -7    0.70    5.60
 -25   1  -7   -3.30    5.60
 -27  -1  -7   16.70    7.60
 -32  -2   7   13.10    7.50
 -32  -2   7   23.70    6.80
 -30  -2   7   46.40    7.90
 -30  -2   7   54.19   10.20
 -30   2   7   47.40    7.50
 -30   2   7   47.10    7.80
 -28  -2   7   26.30    7.30
 -28   2   7   13.00    5.50
 -28   2   7    2.90    5.40
 -26  -2   7  155.78   11.30
 -26  -2   7  152.18   11.60
 -26   2   7  163.38   10.80
 -26   2   7  149.39   10.80
 -24  -2   7    4.80    5.00
 -24  -2   7    7.50    5.90
 -24   2   7    7.90    5.00
 -24   2   7   -1.20    4.90
 -22  -2   7   14.50    4.80
 -22  -2   7    2.60    5.00
 -22   2   7    0.20    4.60
 -22   2   7    4.20    4.80
 -20  -2   7   74.09    8.50
 -20  -2   7   64.59    7.10
 -20  -2   7   61.09    5.70
 -20   2   7   69.79    7.70
 -20   2   7   58.39    6.80
 -18  -2   7  345.47   12.40
 -18  -2   7  330.97   14.20
 -18  -2   7  347.87   13.20
 -18  -2   7  339.77   14.70
 -18  -2   7  303.77   15.00
 -18   2   7  349.77   14.20
 -18   2   7  372.06   13.90
  18   2  -7  355.36   18.00
  16  -2  -7   56.99    5.20
 -16  -2   7   61.49    6.00
 -16  -2   7   73.79    6.80
  16  -2  -7   60.09    4.70
 -16  -2   7   66.49    5.90
  16  -2  -7   55.69    6.10
 -16  -2   7   56.79    6.60
  16   2  -7   59.59    6.20
  16   2  -7   65.29    6.60
 -16   2   7   62.59    6.70
 -16   2   7   60.59    6.70
 -14  -2   7   35.70    5.20
 -14  -2   7   30.30    4.10
  14  -2  -7   33.50    4.10
 -14  -2   7   37.60    4.70
 -14  -2   7   35.80    4.90
  14  -2  -7   28.80    4.00
  14  -2  -7   27.40    4.20
 -14  -2   7   26.20    4.50
 -14   2   7   27.00    5.00
 -14   2   7   34.00    5.00
  14   2  -7   26.10    4.70
  14   2  -7   27.60    4.70
  12  -2  -7   41.00    4.20
  12  -2  -7   45.20    4.80
 -12  -2   7   47.50    5.40
 -12  -2   7   49.20    5.10
 -12  -2   7   58.09    5.60
 -12  -2   7   49.70    5.30
 -12  -2   7   42.70    4.20
  12  -2  -7   41.60    4.50
  12   2  -7   43.30    4.80
 -12   2   7   51.29    5.40
 -12   2   7   44.60    5.50
  12   2  -7   48.20    6.10
 -10  -2   7    3.80    3.00
 -10  -2   7    4.30    2.30
  10  -2  -7    4.30    2.70
  10  -2  -7    9.80    2.80
 -10  -2   7    5.40    3.20
 -10  -2   7   10.80    2.80
 -10  -2   7    4.10    3.20
 -10  -2   7    7.80    3.40
  10  -2  -7    4.80    2.80
 -10  -2   7    6.70    2.90
  10   2  -7    8.30    2.90
  10   2  -7    6.80    3.10
  -8  -2   7   65.29    5.20
   8  -2  -7   63.29    4.70
   8  -2  -7   62.59    4.70
   8  -2  -7   70.19    4.80
  -8  -2   7   73.79    5.00
  -8  -2   7   65.89    5.80
  -8  -2   7   81.59    5.40
   8  -2  -7   63.29    4.90
  -8  -2   7   61.89    4.90
  -8   2   7   64.99    5.50
  -8   2   7   71.39    5.60
   8   2  -7   61.69    5.10
   8   2  -7   70.69    5.40
  -8   2   7   64.19    6.20
   6  -2  -7   38.90    4.30
   6  -2  -7   42.90    4.50
  -6  -2   7   49.30    5.00
  -6  -2   7   44.70    4.00
  -6  -2   7   48.80    4.30
  -6  -2   7   51.39    5.40
   6  -2  -7   52.69    4.70
   6  -2  -7   49.60    4.40
  -6  -2   7   40.90    4.00
  -6   2   7   58.69    5.90
   6   2  -7   50.39    4.60
   6   2  -7   42.00    4.50
  -6   2   7   48.30    5.30
  -6   2   7   48.00    5.00
   4  -2  -7   46.00    4.60
  -4  -2   7   43.80    3.50
  -4  -2   7   41.60    3.50
  -4  -2   7   50.19    4.90
  -4  -2   7   57.89    5.80
  -4  -2   7   47.70    3.80
   4  -2  -7   47.20    4.70
  -4   2   7   43.90    4.60
  -4   2   7   48.10    5.60
   4   2  -7   38.30    4.00
  -4   2   7   49.30    5.30
   4   2  -7   39.80    4.40
  -2  -2   7  185.08    8.80
   2  -2  -7  184.58    9.20
  -2  -2   7  171.98    6.00
  -2  -2   7  182.88    8.00
  -2  -2   7  174.68    6.10
   2  -2  -7  174.48    7.80
   2  -2  -7  168.38    7.80
  -2   2   7  166.48    8.30
  -2   2   7  187.28    8.00
  -2   2   7  188.88    8.90
  -2   2   7  177.28    8.70
   2   2  -7  181.28    6.90
   2   2  -7  171.48    7.20
  -2   2   7  158.18    8.00
   0  -2  -7    6.30    2.60
   0  -2  -7    2.10    2.70
   0  -2   7    5.40    3.40
   0  -2  -7    4.10    4.10
   0  -2  -7    4.10    3.40
   0  -2   7    3.90    3.10
   0  -2  -7    5.70    3.00
   0   2   7    0.00    2.60
   0   2  -7    5.30    2.50
   0   2   7    7.20    3.20
   0   2   7   -0.20    3.40
   0   2   7    0.70    2.70
   0   2   7    3.70    3.60
   0   2  -7    5.40    2.10
   2  -2   7   81.29    6.10
  -2  -2  -7   88.99    6.10
  -2  -2  -7   91.29    5.80
   2  -2   7   89.19    6.90
  -2  -2  -7   98.79    6.40
  -2  -2  -7  103.19    6.40
   2   2   7   85.09    6.60
  -2   2  -7   91.99    4.70
   2   2   7   83.39    6.80
   2   2   7   94.59    6.90
   2   2   7  100.99    6.30
  -2   2  -7  100.19    4.60
   2   2   7   90.49    6.20
  -4  -2  -7  216.48    9.70
  -4  -2  -7  219.78    9.70
  -4  -2  -7  212.88    9.70
   4  -2   7  208.48    9.30
  -4  -2  -7  213.88    9.70
  -4  -2  -7  200.98    9.30
   4   2   7  213.28    9.60
  -4   2  -7  221.58    7.60
  -4   2  -7  221.78    7.80
  -4   2  -7  208.58    7.50
  -4   2  -7  212.58    7.70
   4   2   7  212.48   10.30
   4   2   7  219.18    9.60
   4   2   7  224.88   10.10
   6  -2   7   76.69    6.10
  -6  -2  -7   67.19    6.10
  -6  -2  -7   75.29    6.40
  -6  -2  -7   82.89    6.60
  -6  -2  -7   86.09   10.60
  -6   2  -7   73.89    4.40
   6   2   7   81.29    7.70
  -6   2  -7   73.59    4.40
   6   2   7   77.09    7.10
  -6   2  -7   79.79    4.20
   6   2   7   89.19    6.50
   6   2   7   70.99    7.20
   6   2   7   81.59    6.70
  -8  -2  -7  104.89    7.70
  -8  -2  -7  111.89    7.80
  -8  -2  -7  124.19    7.80
   8   2   7  116.49    8.00
  -8   2  -7  111.49    5.40
   8   2   7  122.99    8.60
   8   2   7  135.59   10.60
  -8   2  -7  114.09    5.30
  -8   2  -7  114.89    5.70
  -8   2  -7  111.69    6.00
  -8   2  -7  104.39    5.60
   8   2   7  122.39    8.40
 -10  -2  -7    3.40    4.00
 -10  -2  -7   -1.20    4.00
 -10   2  -7    4.30    2.60
 -10   2  -7    2.40    2.40
  10   2   7   10.10    4.50
 -10   2  -7    8.90    3.30
  10   2   7    2.40    4.10
 -10   2  -7    3.20    2.80
  10   2   7    2.70    4.40
 -10   2  -7    2.90    2.80
  10   2   7    8.30    5.20
 -12  -2  -7   36.30    5.80
 -12   2  -7   27.90    4.40
 -12   2  -7   35.30    4.10
 -12   2  -7   32.90    4.50
  12   2   7   35.50    6.20
  12   2   7   32.00    5.90
 -12   2  -7   40.60    4.30
  12   2   7   38.30    7.10
 -12   2  -7   33.00    4.00
 -14  -2  -7    2.60    4.80
 -14  -2  -7    0.50    4.70
 -14   2  -7    0.20    3.20
  14   2   7   -3.10    4.70
 -14   2  -7   -3.60    3.30
 -14   2  -7   -1.90    2.90
  14   2   7   -7.80    3.80
 -14   2  -7    2.10    3.00
  14   2   7   -2.10    4.90
 -16  -2  -7   27.20    6.40
 -16  -2  -7   29.00    6.20
 -16   2  -7   26.90    4.90
 -16   2  -7   21.00    4.80
 -16   2  -7   29.80    4.40
  16   2   7   23.70    6.00
  16   2   7   19.70    6.20
  16   2   7   18.80    5.20
 -16   2  -7   27.70    4.50
 -18  -2  -7   62.39    8.10
 -18  -2  -7   65.99    9.00
 -18   2  -7   57.99    6.30
  18   2   7   52.29    7.70
 -18   2  -7   60.29    6.00
 -18   2  -7   46.00    5.90
 -18   2  -7   57.79    6.70
  18   2   7   46.90    8.30
  18   2   7   46.40    7.20
 -20  -2  -7   -5.40    5.20
  20   2   7    3.50    4.60
 -20   2  -7   -6.90    3.50
 -20   2  -7   -1.70    3.70
 -20   2  -7    1.40    4.60
  20   2   7    9.40    5.30
 -22  -2  -7    7.90    8.00
 -22  -2  -7   10.80    6.20
 -22   2  -7    2.80    4.80
 -22   2  -7    4.00    4.50
 -24  -2  -7   24.10    7.30
 -24  -2  -7   28.40    7.60
 -24   2  -7   20.20    5.60
 -24   2  -7   30.90    7.00
 -26  -2  -7  134.19   18.50
 -26  -2  -7   65.89   10.50
 -26   2  -7   62.89    9.80
 -29  -3   7   15.40    7.20
 -29  -3   7  -16.10    7.50
 -29   3   7   12.40    6.00
 -29   3   7   24.40    9.10
 -27  -3   7    7.50    6.00
 -27  -3   7   -3.10    5.40
 -27  -3   7    9.10    6.50
 -27   3   7    2.80    4.70
 -27   3   7    0.40    5.30
 -25  -3   7   11.20    6.10
 -25  -3   7   20.30    6.20
 -25  -3   7   16.50    5.10
 -25  -3   7   23.30    6.70
 -25   3   7    9.60    5.60
 -25   3   7    8.60    5.50
 -23  -3   7   19.60    5.80
 -23  -3   7   13.70    5.70
 -23  -3   7   10.50    5.20
 -23  -3   7   15.00    5.00
 -23   3   7   13.70    5.70
 -23   3   7   13.50    6.00
 -21  -3   7    9.30    4.50
 -21  -3   7   11.00    4.50
 -21  -3   7    0.60    4.40
 -21  -3   7    3.20    4.90
 -21   3   7    3.60    8.00
 -21   3   7    3.40    4.90
 -19  -3   7    1.70    4.20
  19  -3  -7   -1.20    3.50
 -19  -3   7   -0.70    4.50
 -19  -3   7    1.90    4.10
 -19  -3   7   -3.00    4.30
 -19   3   7    2.10    4.40
  19   3  -7    2.20    5.60
 -19   3   7    2.30    4.70
 -17  -3   7  181.58   10.00
 -17  -3   7  162.18    9.80
 -17  -3   7  170.98    9.70
 -17  -3   7  176.68   10.10
  17  -3  -7  179.38    9.00
  17  -3  -7  161.28    7.90
 -17   3   7  173.28    9.90
 -17   3   7  178.88   11.70
 -17   3   7  191.88   10.00
  17   3  -7  183.78   11.10
 -15  -3   7    8.60    4.60
 -15  -3   7    3.90    4.00
 -15  -3   7    5.90    4.20
  15  -3  -7    9.10    2.50
 -15  -3   7    4.10    3.70
  15  -3  -7    4.30    4.00
 -15  -3   7    7.20    3.70
 -15   3   7    2.80    5.20
  15   3  -7   10.50    4.30
 -15   3   7    1.30    3.60
 -15   3   7   -2.90    3.80
  15   3  -7   11.20    4.40
  13  -3  -7    6.20    2.60
 -13  -3   7    1.30    4.50
  13  -3  -7    9.30    4.10
 -13  -3   7   10.60    3.50
  13  -3  -7    7.70    2.80
 -13  -3   7    6.20    3.60
 -13  -3   7    5.70    4.70
 -13  -3   7   11.90    4.00
  13   3  -7    9.90    3.90
  13   3  -7    6.00    4.30
 -13   3   7    2.10    3.90
 -13   3   7    9.50    5.30
 -13   3   7    3.50    3.80
 -11  -3   7    4.60    4.00
  11  -3  -7   -4.00    2.40
  11  -3  -7    3.40    4.10
 -11  -3   7   -2.30    2.90
 -11  -3   7   -1.10    2.90
 -11  -3   7   -8.00    3.80
 -11   3   7   -5.40    3.80
  11   3  -7    2.80    3.30
 -11   3   7   -3.20    3.40
 -11   3   7    1.40    4.40
  11   3  -7    2.30    3.50
  -9  -3   7   -2.20    2.40
   9  -3  -7    0.10    3.90
   9  -3  -7   -3.80    2.70
  -9  -3   7   -1.10    3.80
   9  -3  -7   -2.00    2.40
  -9  -3   7    2.90    3.90
  -9  -3   7    3.20    2.90
  -9   3   7   -2.30    4.90
  -9   3   7   -2.20    3.30
   9   3  -7   -1.00    3.40
  -9   3   7   -1.30    3.60
   9   3  -7    2.30    3.10
  -7  -3   7  666.33   21.50
  -7  -3   7  664.73   22.10
  -7  -3   7  613.34   19.90
   7  -3  -7  666.83   21.70
   7  -3  -7  663.13   20.20
   7  -3  -7  663.93   19.20
  -7  -3   7  600.24   19.40
   7  -3  -7  647.74   20.40
  -7   3   7  669.53   21.30
  -7   3   7  662.43   22.60
  -7   3   7  654.83   21.70
   7   3  -7  673.73   20.60
   7   3  -7  667.83   21.00
   5  -3  -7   54.79    5.30
  -5  -3   7   68.19    6.80
  -5  -3   7   63.69    7.20
   5  -3  -7   56.19    4.80
   5  -3  -7   53.29    5.20
  -5   3   7   59.59    7.20
   5   3  -7   51.49    5.00
  -5   3   7   57.99    6.30
   5   3  -7   55.89    5.30
  -5   3   7   66.99    6.80
   3  -3  -7  478.25   15.90
  -3  -3   7  485.55   17.80
  -3  -3   7  481.45   16.70
   3   3  -7  474.95   15.00
  -3   3   7  461.75   17.60
   3   3  -7  448.06   15.20
  -3   3   7  456.75   16.30
  -3   3   7  480.75   16.90
  -3   3   7  464.45   16.40
  -3   3   7  475.45   17.20
   1  -3  -7    4.70    3.20
  -1  -3   7    1.90    4.20
  -1  -3   7    0.10    3.70
   1  -3  -7   -0.40    3.10
  -1   3   7   -6.80    3.00
  -1   3   7   -3.50    3.60
  -1   3   7   -2.30    4.10
   1   3  -7   -0.40    2.40
  -1   3   7    6.90    3.90
   1   3  -7    3.20    2.30
  -1   3   7   -3.40    4.00
  -1  -3  -7   43.30    5.10
  -1  -3  -7   59.49    6.20
   1  -3   7   54.79    6.20
   1  -3   7   43.30    6.50
   1   3   7   50.89    7.40
   1   3   7   57.29    6.20
   1   3   7   48.10    6.60
   1   3   7   45.60    6.20
   1   3   7   52.99    6.00
  -1   3  -7   41.50    4.00
  -3  -3  -7   33.50    5.30
  -3  -3  -7   27.20    5.00
   3  -3   7   19.50    4.90
   3  -3   7   26.50    5.90
   3   3   7   22.40    5.60
   3   3   7   21.50    5.40
   3   3   7   28.60    5.50
  -3   3  -7   22.60    2.90
   3   3   7   31.60    5.70
   3   3   7   21.90    4.70
  -5  -3  -7   16.20    4.60
   5  -3   7   12.00    5.00
  -5  -3  -7   14.60    4.50
   5  -3   7   18.20    5.40
   5   3   7   10.20    5.30
   5   3   7   13.30    5.20
   5   3   7   15.90    4.60
   5   3   7   13.10    5.20
   5   3   7   23.50    5.20
  -7  -3  -7   86.29    7.60
   7  -3   7   86.79    8.90
   7  -3   7   88.39    7.60
  -7  -3  -7   84.79    7.80
   7   3   7   82.89    8.50
  -7   3  -7   90.69    5.90
   7   3   7   89.79    8.20
   7   3   7   94.39    9.00
   7   3   7   98.09   11.00
  -9  -3  -7    9.00    5.50
  -9  -3  -7    8.60    4.60
   9   3   7    2.00    4.80
   9   3   7    3.10    5.60
   9   3   7   -3.30    4.20
   9   3   7   12.60    4.90
 -11  -3  -7   30.30    6.30
 -11  -3  -7   23.30    5.60
  11   3   7   23.20    7.20
  11   3   7   26.40    6.20
  11   3   7   35.30    7.10
 -11   3  -7   24.40    4.40
 -13  -3  -7   60.09   12.40
 -13  -3  -7   66.59    7.90
  13   3   7   63.19    9.00
  13   3   7   61.99    8.40
  13   3   7   44.30    7.50
 -15  -3  -7   14.20    5.50
 -15  -3  -7   15.20    6.00
  15   3   7   11.90    5.40
  15   3   7    9.30    5.60
 -17  -3  -7  110.79   10.50
 -17  -3  -7   99.99   10.30
  17   3   7  102.49   10.60
  17   3   7   84.59    9.50
  17   3   7  104.89   12.10
 -17   3  -7  106.99    7.20
 -19  -3  -7   11.10   10.80
 -19  -3  -7   18.00    7.00
  19   3   7   12.30    6.30
 -19   3  -7   14.20    3.40
  19   3   7   12.10    6.10
  19   3   7   14.60    7.20
 -19   3  -7   14.70    4.30
 -21  -3  -7    7.20    6.40
 -21  -3  -7    6.30    7.60
 -21   3  -7   -3.70    3.50
  21   3   7    5.50    6.40
 -21   3  -7    1.10    4.10
 -23  -3  -7   22.10    7.00
 -23  -3  -7    6.40    7.10
 -23   3  -7    7.80    4.60
 -26  -4   7    9.90    5.90
 -26  -4   7  -15.20    9.80
 -26  -4   7   -2.70    5.20
 -26   4   7   11.20    5.40
 -26   4   7   12.70    6.80
 -26   4   7    6.00    7.70
 -24  -4   7   32.30    8.70
 -24  -4   7   11.50    6.20
 -24  -4   7   29.30    6.40
 -24   4   7   23.10    6.00
 -24   4   7   18.30    7.60
 -24   4   7   27.50    5.70
 -22  -4   7    3.00    5.20
 -22  -4   7    3.90    5.90
  22  -4  -7    4.10    4.70
 -22  -4   7   21.80    5.80
 -22   4   7    8.30    5.00
 -22   4   7    9.90    5.00
 -22   4   7   -7.10    5.90
 -20  -4   7    9.30    5.60
  20  -4  -7    6.80    4.60
 -20  -4   7   12.10    6.40
 -20  -4   7    4.70    4.40
 -20   4   7   15.00    7.30
 -20   4   7   -0.40    4.80
 -20   4   7   -0.40    4.30
 -18  -4   7   10.40    5.80
  18  -4  -7    9.70    5.00
 -18  -4   7   -5.70    4.50
 -18  -4   7    3.30    5.70
 -18  -4   7    8.30    4.00
 -18   4   7   -9.00    5.40
 -18   4   7    9.30    5.30
 -18   4   7    2.80    4.40
 -16  -4   7    1.20    5.20
 -16  -4   7    2.00    3.80
 -16  -4   7   -2.00    4.90
 -16  -4   7   -4.70    3.20
  16  -4  -7   -3.90    4.50
 -16   4   7    1.20    6.60
 -16   4   7    4.50    4.60
 -16   4   7    0.60    4.90
  14  -4  -7    1.20    4.70
 -14  -4   7   -1.10    4.80
 -14  -4   7    0.90    5.00
 -14  -4   7    3.40    3.60
 -14  -4   7   -2.10    3.10
 -14   4   7   -1.00    4.90
 -14   4   7    0.50    4.50
  14   4  -7  -10.50    4.40
  14   4  -7  -15.60    5.60
 -14   4   7   -1.10    6.10
 -12  -4   7   31.80    4.10
 -12  -4   7   21.20    5.80
 -12  -4   7   36.80    6.50
  12  -4  -7   42.60    7.10
 -12  -4   7   29.20    6.50
 -12   4   7   33.90    6.00
 -12   4   7   31.20    7.60
  12   4  -7   43.90    6.40
  12   4  -7   36.60    7.80
 -12   4   7   25.70    5.40
 -10  -4   7   61.79    8.20
 -10  -4   7   48.30    4.30
  10  -4  -7   55.49   12.30
 -10  -4   7   48.00    7.20
  10   4  -7   58.99    6.50
 -10   4   7   47.50    6.90
  10   4  -7   65.39    7.00
 -10   4   7   49.90    8.40
 -10   4   7   49.60    6.60
  10   4  -7   55.49    6.10
   8  -4  -7   52.99    5.60
  -8  -4   7   64.39    8.80
  -8  -4   7   53.09    8.00
   8  -4  -7   58.89    4.60
  -8   4   7   61.89    8.70
   8   4  -7   59.89    6.40
  -8   4   7   58.09    7.20
   8   4  -7   68.19    7.00
  -8   4   7   59.89    7.40
  -6  -4   7    5.30    5.50
   6  -4  -7    1.60    6.00
   6  -4  -7    1.90    2.80
  -6  -4   7    8.10    5.50
   6  -4  -7    4.70    3.00
   6  -4  -7   -2.60    3.00
   6   4  -7    0.30    3.30
  -6   4   7    0.80    4.90
   6   4  -7   -0.80    4.20
  -6   4   7   -5.20    4.50
  -6   4   7   -4.80    5.10
   4  -4  -7    5.90    4.00
  -4  -4   7   -0.40    5.60
   4  -4  -7    7.90    5.30
   4  -4  -7   -1.70    2.40
  -4  -4   7   -3.40    4.70
   4   4  -7    2.20    3.20
  -4   4   7    5.60    5.70
   4   4  -7    1.80    3.60
  -4   4   7   -2.80    4.70
  -4   4   7    7.90    4.70
  -2  -4   7  242.98   12.30
   2  -4  -7  232.18   10.20
  -2  -4   7  240.68   13.60
   2  -4  -7  230.48   13.20
   2  -4  -7  246.18   10.60
  -2   4   7  222.88   11.10
   2   4  -7  231.98    9.70
  -2   4   7  213.08   13.20
  -2   4   7  211.38   12.80
  -2   4   7  238.58   12.30
  -2   4   7  242.78   12.00
   2   4  -7  203.98    9.00
   0  -4  -7   10.20    5.90
   0  -4   7    2.10    5.80
   0  -4  -7    5.40    3.10
   0  -4  -7    4.60    4.10
   0  -4  -7    2.90    3.40
   0  -4   7   -7.30    4.60
   0   4   7    2.60    4.80
   0   4   7    3.10    4.30
   0   4  -7    6.80    2.90
   0   4   7   -1.90    4.80
   0   4   7    5.10    4.30
   0   4   7   -3.90    5.10
  -2  -4  -7   65.29    9.20
  -2  -4  -7   59.79    6.20
   2  -4   7   54.79    8.40
   2  -4   7   68.59    7.70
   2   4   7   53.49    7.30
   2   4   7   54.09    6.90
   2   4   7   65.19    7.20
   2   4   7   56.29    7.90
   2   4   7   56.89    8.20
   4  -4   7    1.80    5.60
  -4  -4  -7    6.90    4.10
  -4  -4  -7   11.10    4.30
  -4  -4  -7    5.00    5.60
   4  -4   7    5.10    5.20
   4   4   7   10.50    5.40
   4   4   7    1.80    7.60
   4   4   7   -1.10    5.00
   4   4   7   -0.30    5.60
  -6  -4  -7    0.60    4.10
   6  -4   7    1.50    5.90
  -6  -4  -7   -2.80    4.40
   6  -4   7    2.20    5.00
   6   4   7   15.30    7.10
   6   4   7   -2.90    5.00
   6   4   7   -0.40    5.20
   6   4   7    2.30    5.40
  -8  -4  -7   -2.50    4.60
  -8  -4  -7   -1.00    4.40
   8  -4   7    9.70    5.30
   8  -4   7    1.70    5.60
   8   4   7   12.10    9.80
   8   4   7    6.80    5.80
 -10  -4  -7    3.70    4.50
 -10  -4  -7    7.70    4.80
  10   4   7   10.40    6.50
  10   4   7    2.90    5.70
 -10   4  -7   13.10    4.20
  10   4   7    6.60    7.00
 -12  -4  -7   31.90    6.20
 -12  -4  -7   50.69    7.00
 -12   4  -7   38.00    5.80
  12   4   7   37.10    6.80
  12   4   7   34.80    7.90
  12   4   7   35.20    8.40
 -14  -4  -7    8.30    5.60
 -14  -4  -7  -12.80    8.90
 -14  -4  -7    2.60    6.70
  14   4   7    1.00    6.30
  14   4   7    1.60    6.10
  14   4   7    2.20    6.60
 -14   4  -7    3.30    4.90
 -16  -4  -7   33.30    7.40
 -16  -4  -7    9.40    6.80
 -16  -4  -7    5.00    7.20
  16   4   7   15.50    6.90
  16   4   7   10.90    6.50
  16   4   7   20.90    7.20
 -16   4  -7   26.80    6.00
 -18  -4  -7    9.50    8.10
 -18  -4  -7    6.10    6.70
 -18  -4  -7   15.10    8.00
 -18   4  -7  -10.10    6.50
  18   4   7   -2.00    5.60
  18   4   7   -3.70    5.90
  18   4   7   11.20    7.00
  20   4   7   -5.90    6.30
 -20   4  -7   -4.60    6.80
  19  -5  -7    4.30    6.30
 -19  -5   7    4.10    6.50
 -19  -5   7    2.90    6.20
 -19   5   7    6.90    4.50
 -17  -5   7    3.00    6.10
 -17  -5   7   17.90    7.10
  17  -5  -7   -3.20    5.70
 -17   5   7    7.50    7.40
 -17   5   7   12.10    4.90
 -17   5   7   12.70    5.40
  15  -5  -7   17.70    7.10
 -15  -5   7   22.30    7.90
 -15  -5   7    6.70    6.40
 -15   5   7   29.40    5.80
 -15   5   7   17.40    7.40
 -15   5   7   14.90    5.20
  13  -5  -7    7.80    6.50
 -13  -5   7   -6.30    6.70
 -13  -5   7    3.00    9.60
 -13   5   7    6.50    4.50
 -13   5   7    4.70    6.70
 -13   5   7    4.70    5.20
 -11  -5   7   42.00    8.30
  11  -5  -7   35.60    5.90
  11  -5  -7   32.00    7.30
 -11  -5   7   25.00    7.70
 -11   5   7   28.60    7.80
 -11   5   7   30.10    6.60
 -11   5   7   32.40    5.90
   9  -5  -7   18.70    4.50
   9  -5  -7   23.70    6.70
  -9  -5   7   18.20    7.10
  -9  -5   7   12.80    6.60
  -9   5   7   18.00    5.90
  -9   5   7   -1.70    6.30
  -9   5   7   22.30    6.20
   7  -5  -7    3.10    4.20
   7  -5  -7    0.90    5.40
  -7  -5   7    3.40    5.90
  -7  -5   7   20.60    7.70
  -7   5   7   -9.20    6.40
  -7   5   7   -5.30    4.80
  -7   5   7    0.00    4.60
   7   5  -7    7.40    5.10
  -5  -5   7    9.40    7.00
   5  -5  -7   17.50    6.70
   5  -5  -7    8.50    4.00
  -5  -5   7   14.10    6.60
  -5   5   7    4.80    7.20
  -5   5   7   18.80    6.00
   5   5  -7   -4.40    4.40
  -5   5   7   15.90    6.10
  -3  -5   7   40.60    9.70
   3  -5  -7   28.80    8.20
  -3  -5   7   29.40    7.50
   3  -5  -7   30.90    5.40
   3   5  -7   38.60    4.70
  -3   5   7   35.30    7.20
  -3   5   7   28.80    8.80
   3   5  -7   37.20    4.90
  -3   5   7   37.70    7.60
  -1  -5   7    7.30    5.70
   1  -5  -7   -1.10    5.80
   1  -5  -7    1.00    4.20
  -1  -5   7   -3.90    6.30
  -1   5   7    2.40    5.50
  -1   5   7   -3.60    5.40
   1   5  -7    7.90    3.60
  -1   5   7   10.20    6.80
   1  -5   7   18.00    7.00
  -1  -5  -7   14.70    6.70
  -1  -5  -7   22.70    5.70
   1  -5   7   22.10    7.80
   1   5   7   14.80    6.20
   1   5   7   17.40    6.80
   1   5   7   27.50    6.70
   3  -5   7    6.30    7.10
  -3  -5  -7   10.80    5.70
   3  -5   7   19.30    6.70
  -3  -5  -7   11.10    6.60
   3   5   7   13.40    6.10
   3   5   7    7.90    5.90
   3   5   7    4.40    6.70
   5  -5   7   -6.00    5.20
   5  -5   7   -5.70    6.00
  -5  -5  -7   -2.40    5.20
  -5  -5  -7   12.30    8.00
   5   5   7   -0.80    5.50
   5   5   7    7.50    7.50
   5   5   7    4.80    6.30
   7  -5   7    8.00    7.40
  -7  -5  -7    9.70    6.10
  -7  -5  -7   13.80    8.90
   7  -5   7    6.10    6.10
   7   5   7   15.00    6.60
   7   5   7    4.70    6.50
   7   5   7   13.90    7.10
   9  -5   7    5.50    6.90
  -9  -5  -7    0.20    6.90
  -9  -5  -7   -4.80    5.50
   9  -5   7   10.20   10.90
   9   5   7    0.20    6.30
   9   5   7    3.40    5.90
   9   5   7    7.10    6.80
 -11  -5  -7   -3.00   12.50
  11   5   7   -2.20    6.40
  11   5   7    6.60    7.10
  11   5   7   -4.20    7.50
 -13  -5  -7   16.50    9.00
  13   5   7    9.40    6.80
  13   5   7   15.90    7.60
 -34   0   8  270.37   16.20
 -34   0   8  256.97   23.70
 -32   0   8    9.50    6.20
 -32   0   8   25.80    6.80
 -30   0   8   23.00    7.00
 -30   0   8   13.00    6.50
 -28   0   8    9.30    5.40
 -28   0   8    6.10    6.20
 -26   0   8  132.79   10.40
 -26   0   8  127.39   10.60
 -24   0   8   35.40    6.80
 -24   0   8   48.60    7.00
 -22   0   8   43.70    6.40
 -22   0   8   45.60    6.80
 -20   0   8   14.30    5.30
 -20   0   8   20.30    5.00
 -18   0   8   97.39    7.70
 -18   0   8  104.89    8.20
 -16   0   8  131.79    8.20
  16   0  -8  135.59    7.60
  16   0  -8  136.79    7.40
 -16   0   8  144.29    8.40
 -14   0   8   56.99    6.00
  14   0  -8   42.70    6.90
  14   0  -8   49.50    4.80
 -14   0   8   46.90    5.40
  12   0  -8  403.96   14.00
 -12   0   8  419.36   14.70
  12   0  -8  410.16   12.30
 -12   0   8  427.26   14.40
 -10   0   8  756.32   23.00
  10   0  -8  765.82   21.60
  10   0  -8  757.72   23.10
 -10   0   8  762.22   23.30
   8   0  -8  247.88    9.60
   8   0  -8  249.88    9.20
  -8   0   8  244.28    9.50
  -8   0   8  251.97   10.10
   6   0  -8   50.39    4.50
   6   0  -8   51.69    4.40
  -6   0   8   48.60    4.70
  -6   0   8   48.90    4.60
  -6   0   8   54.99    4.00
  -4   0   8  270.37    9.60
  -4   0   8  260.07    8.60
  -4   0   8  260.27    9.80
   4   0  -8  247.98    9.40
   4   0  -8  248.78    9.70
  -2   0   8   25.00    3.80
   2   0  -8   18.60    3.30
   2   0  -8   21.30    3.40
   2   0  -8   24.30    3.60
   2   0  -8   22.90    2.60
  -2   0   8   28.20    3.60
  -2   0   8   27.80    3.10
   0   0  -8  740.03   22.20
   0   0   8  746.63   22.00
   0   0   8  761.82   22.30
   0   0  -8  744.53   21.90
   0   0   8  746.63   21.10
   0   0  -8  722.43   21.00
   0   0  -8  746.33   22.30
   0   0  -8  741.63   22.00
   2   0   8    7.00    2.90
  -2   0  -8    3.90    2.70
  -2   0  -8    6.40    2.20
  -2   0  -8    5.00    2.70
  -2   0  -8    7.50    2.70
   2   0   8    8.80    2.60
   2   0   8    6.90    2.70
  -2   0  -8    3.30    2.60
  -2   0  -8    6.60    2.40
  -4   0  -8   18.70    3.50
  -4   0  -8   18.80    3.10
  -4   0  -8   14.80    3.20
  -4   0  -8   17.90    3.40
   4   0   8   15.30    3.30
  -4   0  -8   18.50    3.70
   4   0   8   26.80    3.70
  -6   0  -8 1059.89   31.20
  -6   0  -8 1059.59   30.70
  -6   0  -8 1064.59   30.70
  -6   0  -8 1021.20   30.20
  -6   0  -8 1066.59   30.90
   6   0   8 1066.59   30.40
   6   0   8 1062.89   31.80
   6   0   8 1069.39   30.60
   8   0   8   97.39    5.60
   8   0   8   81.59    5.60
  -8   0  -8   94.39    7.00
  -8   0  -8   88.49    9.40
  -8   0  -8   81.99    5.90
   8   0   8   76.49    5.30
  -8   0  -8   92.49    6.20
   8   0   8   84.19    5.80
  -8   0  -8   78.09    5.40
   8   0   8   71.59    6.20
 -10   0  -8 3497.65   95.79
 -10   0  -8 3448.16   95.49
 -10   0  -8 3424.26   95.19
 -10   0  -8 3864.81  101.09
  10   0   8 3408.06   95.19
  10   0   8 3469.65   94.79
 -10   0  -8 3582.94   95.29
  12   0   8  324.17   12.50
 -12   0  -8  293.57   13.70
 -12   0  -8  323.37   14.70
 -12   0  -8  321.17   13.10
 -12   0  -8  338.67   12.90
  12   0   8  330.67   12.30
 -12   0  -8  277.07   14.30
 -14   0  -8   10.90    3.90
 -14   0  -8   11.10    4.60
 -14   0  -8    9.30    4.10
  14   0   8    9.20    3.70
  14   0   8   11.20    3.70
 -14   0  -8   10.30    4.60
 -16   0  -8   13.80    4.80
 -16   0  -8   23.30    5.10
 -16   0  -8   17.20    5.40
  16   0   8   12.10    4.30
 -16   0  -8    7.60    4.70
  16   0   8    8.90    3.10
 -18   0  -8   58.19    7.30
 -18   0  -8   57.89    7.30
 -18   0  -8   40.90    6.80
 -18   0  -8   51.39    7.20
 -20   0  -8  112.89   11.40
 -22   0  -8   14.10    6.40
 -22   0  -8    6.40    6.20
 -24   0  -8    1.60    5.50
 -24   0  -8   -1.20    5.40
 -26   0  -8   10.50    6.70
 -26   0  -8    8.60    6.60
 -33  -1   8   40.60    7.80
 -33  -1   8   29.90    8.50
 -33   1   8   44.50    8.30
 -33   1   8   43.90    8.90
 -31  -1   8    1.70    5.60
 -31  -1   8   -0.60    5.80
 -31   1   8    4.00    5.60
 -31   1   8    5.60    5.80
 -29  -1   8   26.40    7.10
 -29  -1   8   -3.70    5.30
 -29   1   8    2.40    5.90
 -29   1   8    0.90    5.10
 -27  -1   8   19.30    6.40
 -27  -1   8   35.80    7.40
 -27   1   8   28.20    8.20
 -27   1   8   34.30    7.00
 -25  -1   8   54.89    7.70
 -25  -1   8   44.60    7.40
 -25   1   8   39.30    7.00
 -25   1   8   48.90    6.90
 -23  -1   8   84.89    8.80
 -23  -1   8   70.19    8.60
 -23   1   8   82.09    8.30
 -23   1   8   95.69    8.90
 -21  -1   8   16.40    5.10
 -21  -1   8    7.10    5.70
 -21   1   8    5.00    4.90
 -21   1   8    3.70    4.50
 -19  -1   8  261.87   12.50
 -19  -1   8  273.27   13.10
 -19   1   8  297.97   12.50
  19   1  -8  284.77   17.90
 -19   1   8  293.47   13.00
 -17  -1   8   75.99    5.20
 -17  -1   8   88.39    7.20
 -17  -1   8   72.69    7.10
 -17   1   8   79.59    7.00
 -17   1   8   81.59    7.00
  17   1  -8   72.19    6.80
  15  -1  -8   51.39    6.90
 -15  -1   8   53.09    5.70
 -15  -1   8   49.40    5.10
 -15  -1   8   40.90    4.20
 -15  -1   8   49.40    5.90
  15   1  -8   53.99    4.30
 -15   1   8   52.89    7.80
  15   1  -8   44.50    5.60
 -15   1   8   49.70    5.60
 -13  -1   8  157.18    8.30
  13  -1  -8  165.58    7.90
 -13  -1   8  164.78    7.30
 -13  -1   8  150.08    8.40
  13  -1  -8  160.18    7.50
 -13  -1   8  161.28    6.80
 -13   1   8  168.48    8.60
 -13   1   8  158.28    8.30
  13   1  -8  153.18    7.80
  13   1  -8  188.48    7.60
  13   1  -8  154.88    8.20
 -11  -1   8    9.00    3.50
 -11  -1   8   12.90    2.80
 -11  -1   8   13.10    3.60
 -11  -1   8    6.80    2.60
  11  -1  -8   14.20    3.10
 -11   1   8    8.30    3.70
  11   1  -8    7.90    3.20
  11   1  -8   11.20    2.70
  11   1  -8   12.80    3.10
 -11   1   8   15.10    3.90
  -9  -1   8 1192.78   32.70
  -9  -1   8 1182.08   33.70
   9  -1  -8 1157.18   33.50
   9  -1  -8 1161.88   33.90
  -9  -1   8 1174.38   34.00
  -9   1   8 1183.78   34.30
  -9   1   8 1205.38   34.10
   9   1  -8 1169.98   33.10
   9   1  -8 1200.48   34.20
   9   1  -8 1189.78   33.70
  -9   1   8 1182.78   34.00
   7  -1  -8    2.90    2.40
  -7  -1   8    2.50    2.90
   7  -1  -8   -1.10    2.50
   7  -1  -8   -0.80    2.20
  -7  -1   8    3.20    2.50
   7  -1  -8   -2.00    2.40
  -7  -1   8   -3.10    2.10
   7   1  -8    3.70    2.50
  -7   1   8    3.70    2.80
   7   1  -8   -0.30    1.80
  -7   1   8   -0.60    3.00
  -7   1   8   -1.00    2.50
   7   1  -8   -4.10    2.30
   5  -1  -8    1.30    2.50
  -5  -1   8   -0.20    2.20
   5  -1  -8   -0.30    2.50
  -5  -1   8    2.80    2.50
  -5  -1   8    2.90    2.50
   5  -1  -8    2.20    2.60
   5  -1  -8    2.00    2.70
  -5   1   8   -1.20    2.70
  -5   1   8    3.10    3.10
   5   1  -8    3.70    1.90
   5   1  -8   -1.60    2.30
   5   1  -8   -2.00    2.30
  -5   1   8   -0.40    2.70
   3  -1  -8  314.17   11.30
  -3  -1   8  324.37   10.40
   3  -1  -8  307.47   11.10
  -3  -1   8  296.87   10.30
   3  -1  -8  306.37   11.20
   3   1  -8  312.37   10.60
   3   1  -8  318.77   10.80
  -3   1   8  309.07   11.50
  -3   1   8  306.77   11.00
   3   1  -8  278.77    9.90
  -3   1   8  304.77   11.20
  -1  -1   8  719.93   20.60
   1  -1  -8  731.33   21.80
   1  -1  -8  699.53   21.80
  -1  -1   8  728.53   20.90
   1  -1  -8  703.03   21.50
   1  -1  -8  685.93   21.20
   1   1  -8  707.63   21.10
  -1   1   8  726.83   21.50
   1   1  -8  674.83   20.60
  -1   1   8  711.03   22.00
   1   1  -8  732.73   20.90
  -1   1   8  715.03   21.70
  -1  -1  -8  206.18   10.00
  -1  -1  -8  185.48    8.30
   1  -1   8  188.58    7.20
  -1  -1  -8  187.28    8.30
   1  -1   8  190.98    7.10
  -1  -1  -8  188.48    8.40
  -1   1  -8  188.78    7.50
  -1   1  -8  185.88    7.60
  -1   1  -8  188.68    7.50
   1   1   8  192.58    8.40
   1   1   8  179.58    8.50
   1   1   8  185.58    8.40
   3  -1   8  442.16   14.20
  -3  -1  -8  478.55   15.80
  -3  -1  -8  450.65   15.40
  -3  -1  -8  481.95   16.10
  -3  -1  -8  489.55   15.80
   3  -1   8  470.85   14.50
  -3  -1  -8  487.05   16.30
   3   1   8  481.15   16.00
   3   1   8  490.25   15.90
   3   1   8  485.65   16.40
  -3   1  -8  475.95   15.10
   3   1   8  470.65   15.90
  -3   1  -8  477.85   15.00
  -3   1  -8  473.15   14.80
   3   1   8  480.85   15.70
  -3   1  -8  473.45   14.80
   5  -1   8    2.80    2.10
  -5  -1  -8    3.80    3.20
  -5  -1  -8    5.50    2.90
  -5  -1  -8    2.00    3.10
  -5  -1  -8    2.90    3.10
  -5  -1  -8    5.30    3.10
  -5   1  -8    4.60    2.50
   5   1   8    6.10    3.50
   5   1   8    3.70    3.50
   5   1   8    4.20    2.90
   5   1   8    2.70    2.80
  -5   1  -8    3.30    2.70
   5   1   8    8.30    3.90
  -5   1  -8    6.20    2.80
  -5   1  -8    5.10    2.80
  -7  -1  -8   61.69    5.30
  -7  -1  -8   62.29    5.90
  -7  -1  -8   70.79    6.20
  -7  -1  -8   70.09    6.10
  -7  -1  -8   68.79    5.90
   7  -1   8   65.29    4.30
   7   1   8   66.89    5.60
  -7   1  -8   58.79    4.80
  -7   1  -8   70.29    5.80
   7   1   8   66.79    6.20
   7   1   8   66.69    6.00
   7   1   8   67.99    6.40
  -7   1  -8   65.49    4.90
   7   1   8   69.79    5.50
  -7   1  -8   72.49    5.30
  -7   1  -8   74.79    5.50
  -9  -1  -8    0.30    3.40
  -9  -1  -8    2.60    3.20
   9  -1   8   -2.40    2.20
  -9  -1  -8   -1.80    3.40
  -9   1  -8   -1.50    2.90
  -9   1  -8    1.30    2.80
   9   1   8    0.10    3.60
  -9   1  -8   -3.40    4.60
  -9   1  -8   -1.50    2.90
   9   1   8   -4.20    4.80
   9   1   8   -2.50    3.60
  -9   1  -8   -4.90    2.60
 -11  -1  -8   23.60    5.10
 -11  -1  -8   18.70    4.90
 -11  -1  -8   26.10    5.20
 -11  -1  -8   23.60    5.10
  11   1   8   22.80    4.70
  11   1   8   22.10    4.90
 -11   1  -8   23.40    4.20
  11   1   8   20.20    5.30
 -11   1  -8   24.20    4.10
 -11   1  -8   24.40    4.10
 -11   1  -8   31.30    4.60
 -11   1  -8   25.90    4.00
 -13  -1  -8  148.59    9.50
 -13  -1  -8  139.19    9.50
 -13  -1  -8  137.69    9.30
 -13   1  -8  153.88    8.40
  13   1   8  155.98    9.80
  13   1   8  147.19    9.60
  13   1   8  162.38    9.20
 -13   1  -8  164.28    8.50
 -13   1  -8  127.89    7.70
 -13   1  -8  138.99    8.10
 -13   1  -8  162.48    8.60
 -15  -1  -8   -0.10    4.50
 -15  -1  -8   12.00    4.80
  15   1   8   12.90    4.70
 -15   1  -8   12.90    4.50
 -15   1  -8    0.70    4.10
  15   1   8   14.10    4.90
 -15   1  -8    6.20    4.00
 -15   1  -8    9.40    3.90
 -17  -1  -8   80.99    8.80
 -17  -1  -8   75.29    8.60
 -17  -1  -8   85.09    9.30
 -17   1  -8   72.89    7.10
  17   1   8   74.39    8.40
  17   1   8   81.69    7.80
 -17   1  -8   77.09    7.80
 -17   1  -8   70.99    7.30
 -17   1  -8   80.29    7.80
 -19  -1  -8   58.19    8.30
 -19  -1  -8   87.79    9.50
 -19   1  -8   67.29    7.50
 -19   1  -8   68.59    7.40
 -19   1  -8   82.79    8.40
  19   1   8   56.09    7.10
  19   1   8   60.69    7.50
 -19   1  -8   81.99   10.50
 -21  -1  -8    1.10    5.30
 -21  -1  -8   -6.60    5.50
 -21   1  -8    8.20    5.20
 -21   1  -8    0.50    4.90
 -23  -1  -8   12.20    6.50
 -23  -1  -8   12.40    6.30
 -23   1  -8   13.50    6.30
 -23   1  -8   21.50    6.50
 -25  -1  -8   17.10    6.90
 -25  -1  -8    5.40    6.70
 -25   1  -8   -3.30    5.60
 -25   1  -8   15.60    6.60
 -32  -2   8   22.60    7.90
 -32  -2   8   17.20    5.60
 -32  -2   8    8.40    6.00
 -30  -2   8   20.40    7.00
 -30  -2   8   14.80    6.30
 -30  -2   8    8.60    4.60
 -30   2   8   12.40    6.00
 -30   2   8   15.10    6.00
 -28  -2   8   -0.50    5.80
 -28   2   8    9.30    5.40
 -28   2   8    4.20    5.00
 -26  -2   8   11.60    6.10
 -26  -2   8   16.20    6.00
 -26  -2   8   15.00    5.30
 -26   2   8   16.30    6.00
 -26   2   8   14.90    6.10
 -24  -2   8   35.50    5.70
 -24  -2   8   46.40    7.30
 -24  -2   8   39.30    7.20
 -24   2   8   47.30    7.20
 -24   2   8   45.50    7.20
 -22  -2   8  168.18   10.50
 -22  -2   8  165.98   10.60
 -22  -2   8  169.58   11.20
 -22   2   8  174.58   10.80
 -22   2   8  182.98   10.70
 -20  -2   8  249.78   12.20
 -20  -2   8  233.98    9.60
 -20  -2   8  223.48   12.30
 -20  -2   8  254.07   11.10
 -20   2   8  253.27   12.40
 -20   2   8  264.67   12.20
 -18  -2   8  608.94   19.10
 -18  -2   8  597.24   20.20
 -18  -2   8  585.24   21.00
 -18  -2   8  634.94   20.00
 -18  -2   8  583.34   21.50
  18   2  -8  631.64   26.00
 -18   2   8  632.44   20.90
 -18   2   8  600.04   21.20
 -16  -2   8  206.38    9.20
 -16  -2   8  210.18   10.80
 -16  -2   8  217.58    9.30
  16  -2  -8  213.18    9.50
 -16  -2   8  227.18   10.60
 -16  -2   8  207.88    9.60
 -16   2   8  216.68   10.90
  16   2  -8  217.68   10.50
  16   2  -8  213.38   10.60
 -16   2   8  220.78   10.50
 -14  -2   8  114.09    7.50
  14  -2  -8  101.79    6.60
 -14  -2   8  123.39    7.10
  14  -2  -8  114.39    6.60
 -14  -2   8  108.29    6.90
 -14  -2   8  113.19    7.90
  14   2  -8  114.99    7.50
 -14   2   8  119.79    7.90
  14   2  -8  109.79    7.30
 -14   2   8  117.19    8.00
  12  -2  -8    5.10    3.00
 -12  -2   8    4.20    3.30
 -12  -2   8    3.60    3.40
 -12  -2   8    0.40    3.30
 -12  -2   8   -0.40    3.30
  12  -2  -8    4.20    2.60
 -12  -2   8    7.80    2.70
 -12   2   8   -0.30    4.30
  12   2  -8    4.30    3.40
 -12   2   8    3.50    3.50
  12   2  -8    4.40    3.40
 -12   2   8    6.30    3.60
  10  -2  -8   89.99    5.80
 -10  -2   8   76.59    5.90
 -10  -2   8   78.49    5.70
 -10  -2   8   94.39    6.10
  10  -2  -8   90.99    6.30
  10  -2  -8   81.99    5.70
 -10  -2   8   93.99    7.90
 -10  -2   8   81.89    6.30
  10   2  -8   94.09    6.00
 -10   2   8   86.49    6.30
 -10   2   8   69.89    7.10
  10   2  -8   78.79    6.30
 -10   2   8   69.79    6.20
   8  -2  -8   92.09    5.70
  -8  -2   8   95.89    6.60
  -8  -2   8   93.19    5.40
   8  -2  -8   92.39    5.90
   8  -2  -8   70.99    6.50
  -8  -2   8   84.29    6.10
   8  -2  -8   93.49    5.50
  -8  -2   8   83.79    5.50
  -8   2   8   90.39    7.90
  -8   2   8   95.39    6.70
   8   2  -8   90.79    6.00
  -8   2   8   87.19   10.10
  -6  -2   8  335.17   11.90
   6  -2  -8  321.07   11.90
  -6  -2   8  319.27   11.20
  -6  -2   8  334.67   12.60
   6  -2  -8  332.67   12.00
  -6  -2   8  317.27   11.10
   6  -2  -8  309.87   11.90
  -6  -2   8  330.47   11.30
   6  -2  -8  333.87   11.80
   6   2  -8  332.97   11.60
   6   2  -8  333.97   12.00
  -6   2   8  337.67   13.00
  -6   2   8  339.67   13.10
  -6   2   8  339.47   12.80
   4  -2  -8   40.80    4.70
  -4  -2   8   35.30    3.30
  -4  -2   8   39.00    3.70
  -4  -2   8   42.60    5.20
  -4  -2   8   37.40    4.80
   4  -2  -8   37.50    4.50
   4  -2  -8   37.70    4.60
   4  -2  -8   38.70    4.10
   4   2  -8   35.90    4.20
  -4   2   8   33.80    4.90
  -4   2   8   35.70    4.90
  -4   2   8   38.70    5.00
   4   2  -8   37.80    4.10
   2  -2  -8    2.10    2.90
   2  -2  -8    6.20    3.20
   2  -2  -8    0.20    2.50
  -2  -2   8    3.70    3.50
  -2  -2   8    6.50    3.30
   2  -2  -8    5.80    3.10
  -2  -2   8    1.70    1.80
  -2  -2   8    4.70    1.80
   2  -2  -8    5.40    2.60
  -2  -2   8    3.80    1.90
  -2   2   8    0.30    3.30
   2   2  -8    3.10    2.60
  -2   2   8    2.50    3.40
  -2   2   8    9.50    3.90
   2   2  -8    2.20    2.30
   0  -2  -8    5.80    2.90
   0  -2  -8    6.40    2.90
   0  -2  -8    6.00    3.10
   0  -2  -8   10.60    3.20
   0  -2   8    5.40    3.40
   0  -2   8    8.80    3.70
   0  -2  -8    3.60    3.10
   0   2  -8    2.10    2.70
   0   2  -8    7.70    2.50
   0   2   8    0.90    3.70
   0   2   8    4.10    2.80
   0   2   8    1.20    3.60
   0   2   8    5.10    3.70
   0   2   8    4.40    3.10
  -2  -2  -8   92.49    6.30
  -2  -2  -8   91.59    6.20
  -2  -2  -8   91.49    6.50
  -2  -2  -8   95.49    6.60
  -2  -2  -8   90.39    6.50
   2  -2   8  101.19    6.70
  -2   2  -8   88.99    4.90
   2   2   8   95.19    7.30
   2   2   8   93.89    6.70
   2   2   8   93.89    7.20
  -2   2  -8   98.79    5.20
   2   2   8   96.89    6.40
  -4  -2  -8   31.10    4.90
   4  -2   8   34.20    4.60
  -4  -2  -8   32.10    5.00
  -4  -2  -8   43.40    5.50
   4   2   8   32.90    5.10
  -4   2  -8   33.80    3.80
  -4   2  -8   36.20    3.50
   4   2   8   38.40    5.10
  -4   2  -8   35.90    3.50
   4   2   8   37.40    5.70
   4   2   8   33.00    5.60
  -4   2  -8   31.30    3.60
  -6  -2  -8   44.90    5.90
  -6  -2  -8   45.10    5.60
  -6  -2  -8   45.70    5.90
  -6   2  -8   44.30    4.30
   6   2   8   65.79    7.10
   6   2   8   55.69    6.40
   6   2   8   44.60    6.40
   6   2   8   47.20    6.30
  -6   2  -8   43.80    4.20
  -6   2  -8   40.80    3.90
  -8  -2  -8   16.00    4.80
  -8  -2  -8   20.80    4.80
   8   2   8   21.70    5.80
   8   2   8   16.50    4.90
  -8   2  -8   19.50    3.50
   8   2   8   19.80    4.80
  -8   2  -8   23.00    3.30
  -8   2  -8   23.40    3.50
  -8   2  -8   22.30    3.40
   8   2   8   27.90    5.20
  -8   2  -8   19.80    3.20
 -10  -2  -8   51.19    6.90
 -10  -2  -8   55.69    7.00
  10   2   8   66.29    7.60
 -10   2  -8   45.50    4.70
  10   2   8   52.89    7.90
 -10   2  -8   56.19    5.10
 -10   2  -8   49.99    5.10
  10   2   8   52.39    6.70
 -10   2  -8   48.20    4.90
 -10   2  -8   47.90    4.60
 -12  -2  -8   53.79    7.30
 -12  -2  -8   59.69    7.60
  12   2   8   53.59    6.80
  12   2   8   66.19    8.70
 -12   2  -8   49.60    5.40
 -12   2  -8   46.00    5.50
 -12   2  -8   51.49    4.80
 -12   2  -8   34.70    5.00
  12   2   8   61.19    8.20
 -12   2  -8   44.60    5.10
 -14  -2  -8    5.40    4.50
 -14  -2  -8   -0.80    4.10
 -14   2  -8   -1.00    2.80
  14   2   8    0.20    4.40
 -14   2  -8    1.80    2.90
 -14   2  -8    1.20    3.80
  14   2   8   -6.00    5.00
 -14   2  -8   -1.40    3.30
 -16  -2  -8    7.90    4.90
 -16  -2  -8    4.40    4.90
 -16   2  -8    4.70    4.30
  16   2   8   -6.10    4.60
 -16   2  -8    2.50    3.40
  16   2   8   -2.00    4.90
 -16   2  -8    6.30    4.00
 -16   2  -8    2.80    3.30
  16   2   8    5.60    4.90
 -18  -2  -8    1.10    5.60
 -18  -2  -8    5.70    6.00
 -18   2  -8   -2.40    5.00
 -18   2  -8    4.70    3.50
 -18   2  -8    0.20    4.40
  18   2   8    0.30    6.60
  18   2   8    0.80    5.00
  18   2   8   -0.10    4.60
 -18   2  -8   -9.80    3.20
 -20  -2  -8    1.40    5.40
 -20  -2  -8   -1.90    5.80
 -20   2  -8    2.50    4.60
 -20   2  -8    2.70    4.00
  20   2   8    3.30    5.00
  20   2   8   10.10    5.60
 -20   2  -8    5.40    4.80
 -22  -2  -8   17.70    7.30
 -22  -2  -8  -11.70    5.40
 -22   2  -8    5.30    5.20
 -22   2  -8   17.80    6.20
 -24  -2  -8   55.39    9.20
 -24  -2  -8   34.20    8.10
 -24   2  -8   51.39    7.30
 -24   2  -8   40.80    7.00
 -29  -3   8   24.70    7.10
 -29  -3   8   19.10    9.10
 -29   3   8   34.20    7.20
 -27  -3   8   21.90    6.40
 -27  -3   8   23.50    6.50
 -27  -3   8   11.80    6.80
 -27   3   8   21.30    6.10
 -27   3   8    9.40    5.60
 -25  -3   8   26.30    6.50
 -25  -3   8   23.00    6.50
 -25  -3   8   42.10    7.40
 -25  -3   8   22.90    5.30
 -25   3   8   31.70    7.30
 -25   3   8   25.30    6.40
 -23  -3   8   -4.10    4.20
 -23  -3   8   -4.40    4.70
 -23  -3   8    0.10    4.80
 -23  -3   8    6.40    4.20
 -23   3   8    2.20    5.60
 -23   3   8    0.40    4.80
 -21  -3   8   20.90    5.80
 -21  -3   8   25.00    5.20
 -21  -3   8   22.10    5.50
  21  -3  -8   18.40    4.20
 -21  -3   8   31.40    6.10
 -21   3   8   20.50    6.50
  19  -3  -8   22.20    3.50
 -19  -3   8   29.80    5.40
  19  -3  -8   25.90    4.20
 -19  -3   8   19.60    5.30
 -19  -3   8   29.40    5.40
  19  -3  -8   26.50    4.50
 -19  -3   8   17.60    5.10
 -19   3   8   21.40    5.70
 -19   3   8   27.20    5.70
 -19   3   8   13.40    5.90
  19   3  -8   34.20    7.00
 -17  -3   8   53.59    6.30
 -17  -3   8   65.19    7.20
 -17  -3   8   57.39    6.40
  17  -3  -8   66.99    4.90
  17  -3  -8   72.19    6.90
 -17  -3   8   61.79    7.20
  17  -3  -8   71.49    4.80
  17   3  -8   51.69    7.30
 -17   3   8   53.29    7.00
 -17   3   8   51.49    8.40
 -17   3   8   62.49    6.90
 -15  -3   8   -0.10    3.60
  15  -3  -8    8.80    3.30
  15  -3  -8   -1.20    3.50
 -15  -3   8    3.00    4.40
 -15  -3   8    3.60    4.20
 -15  -3   8    8.30    4.50
 -15   3   8    2.40    5.40
  15   3  -8    8.40    4.30
 -15   3   8    2.10    4.10
 -15   3   8   -0.40    4.30
  15   3  -8    9.60    4.60
  13  -3  -8   23.20    4.60
  13  -3  -8   20.70    3.30
 -13  -3   8   17.40    3.90
 -13  -3   8   19.60    3.70
 -13  -3   8   19.50    5.10
  13   3  -8   13.70    4.30
 -13   3   8   12.10    4.40
 -13   3   8    1.70    4.90
  13   3  -8   15.30    5.90
 -13   3   8   24.00    5.30
  11  -3  -8   39.90    5.80
 -11  -3   8   42.40    6.00
 -11  -3   8   38.20    5.40
 -11  -3   8   38.90    4.70
  11  -3  -8   42.60    4.70
 -11  -3   8   39.40    4.60
  11  -3  -8   43.30    4.80
 -11   3   8   36.00    6.70
  11   3  -8   32.30    5.30
 -11   3   8   33.10    5.70
 -11   3   8   37.40    6.10
  11   3  -8   39.50    5.20
   9  -3  -8  257.77   10.10
  -9  -3   8  258.27   12.20
  -9  -3   8  259.87   11.50
   9  -3  -8  257.07   11.70
  -9  -3   8  245.78    9.80
   9  -3  -8  251.17   12.50
  -9  -3   8  225.98    9.40
   9   3  -8  258.37   11.10
  -9   3   8  247.18   11.30
  -9   3   8  263.87   12.70
  -9   3   8  259.27   11.80
   9   3  -8  239.18   10.80
  -7  -3   8   53.79    6.90
  -7  -3   8   36.40    4.00
   7  -3  -8   53.49    5.50
  -7  -3   8   52.49    6.50
   7  -3  -8   51.39    6.00
  -7  -3   8   56.49    6.60
   7   3  -8   41.40    5.30
  -7   3   8   46.80    7.00
  -7   3   8   33.00    5.60
   7   3  -8   41.80    4.90
  -7   3   8   39.50    5.50
  -5  -3   8  424.46   16.70
   5  -3  -8  439.76   13.90
  -5  -3   8  439.06   16.00
   5  -3  -8  441.16   15.10
   5   3  -8  442.26   15.10
  -5   3   8  414.16   16.90
  -5   3   8  431.36   16.60
   5   3  -8  418.96   14.50
  -5   3   8  459.45   16.30
  -3  -3   8   14.20    4.60
   3  -3  -8    8.60    3.40
  -3  -3   8   13.50    4.90
   3  -3  -8   12.50    3.70
  -3   3   8    8.10    5.00
   3   3  -8   10.70    2.80
   3   3  -8   12.80    3.40
  -3   3   8    7.70    4.40
  -3   3   8   10.30    4.60
  -1  -3   8   20.90    5.20
   1  -3  -8   20.50    4.10
  -1  -3   8   22.10    4.70
   1  -3  -8   21.30    4.50
   1   3  -8   19.30    3.40
   1   3  -8   21.90    3.10
  -1   3   8   23.60    4.40
  -1   3   8   18.50    5.50
  -1   3   8   24.40    5.70
  -1   3   8   21.30    5.10
  -1   3   8   20.80    4.50
  -1  -3  -8    0.20    3.30
  -1  -3  -8    4.20    3.50
   1  -3   8    2.00    4.20
   1  -3   8    6.60    5.00
   1   3   8    1.40    3.30
  -1   3  -8    1.10    2.30
  -1   3  -8    4.40    3.60
   1   3   8    1.30    4.60
   1   3   8   -0.30    4.10
   1   3   8    0.00    4.20
   1   3   8    3.20    4.80
  -3  -3  -8   15.90    4.50
  -3  -3  -8   24.80    4.80
   3  -3   8   27.00    5.90
  -3   3  -8   17.70    3.00
   3   3   8   16.50    5.40
   3   3   8   16.90    4.60
   3   3   8   12.40    5.00
   3   3   8   16.20    5.40
   3   3   8   33.00    4.90
  -5  -3  -8   -2.60    3.70
   5  -3   8   -1.00    4.40
  -5  -3  -8   -3.70    3.70
   5  -3   8    4.50    5.00
  -5   3  -8    2.00    2.20
   5   3   8   -7.10    3.90
   5   3   8    6.80    3.90
   5   3   8   -7.00    4.00
   5   3   8    9.20    5.40
  -7  -3  -8    3.60    4.00
   7  -3   8    4.40    4.00
   7   3   8    5.10    4.00
   7   3   8    1.30    4.50
   7   3   8   -6.00    4.60
   7   3   8   -4.40    4.20
  -9  -3  -8    5.80    4.20
  -9  -3  -8   -3.00    3.60
   9   3   8   -1.80    4.40
   9   3   8   -2.30    4.90
   9   3   8   -2.00    4.80
 -11  -3  -8    1.60    4.40
 -11  -3  -8   -3.10    4.30
 -11   3  -8   -1.20    3.70
  11   3   8   -3.10    4.70
  11   3   8   -1.60    4.70
  11   3   8    1.00    5.60
 -13  -3  -8    1.50    4.70
 -13  -3  -8    0.10    4.90
  13   3   8   -5.10    4.90
  13   3   8   -5.80    5.00
  13   3   8    6.40    6.10
 -15  -3  -8   10.00    5.10
 -15  -3  -8    1.30    5.10
  15   3   8    0.90    5.90
 -15   3  -8    2.00    3.30
  15   3   8   -1.50    4.90
  15   3   8    2.00    5.90
 -15   3  -8    7.30    4.90
 -17  -3  -8   20.00    6.90
 -17  -3  -8   12.90    6.60
  17   3   8    6.90    6.20
 -17   3  -8   13.20    3.60
  17   3   8    9.10    6.20
  17   3   8    9.10    7.00
 -17   3  -8   16.40    4.00
 -19  -3  -8    3.70    6.10
 -19  -3  -8   -9.90    5.60
  19   3   8   -1.20    5.80
  19   3   8   -1.20    5.90
 -19   3  -8   11.40    3.80
  19   3   8    1.10    6.80
 -19   3  -8    5.20    3.30
 -21  -3  -8   17.00    7.70
 -21  -3  -8   15.00    6.50
 -21   3  -8   18.70    4.70
 -26  -4   8   -4.30    4.50
 -26  -4   8   -2.90    5.60
 -26   4   8    1.30    5.20
 -26   4   8   -0.70    7.60
 -24  -4   8   13.40    5.40
 -24  -4   8    0.00    6.50
 -24  -4   8   -2.80    6.80
 -24   4   8    8.30    5.10
 -24   4   8    1.90    6.60
 -24   4   8    8.60    5.50
  22  -4  -8   11.10    5.00
 -22  -4   8    3.30    5.10
 -22  -4   8   20.00    6.90
 -22  -4   8   12.60    5.50
 -22   4   8    9.10    5.10
 -22   4   8    7.00    7.40
 -22   4   8   11.20    5.70
 -20  -4   8   -2.80    4.30
  20  -4  -8    7.50    4.70
 -20  -4   8   14.10    6.20
 -20  -4   8   10.20    6.00
 -20   4   8    8.00    5.00
 -20   4   8    6.50    5.00
 -20   4   8   12.60    6.90
 -18  -4   8   -5.60    5.40
 -18  -4   8   -2.10    3.40
 -18  -4   8   -0.40    5.30
  18  -4  -8    4.60    4.60
 -18   4   8    8.10    4.90
 -18   4   8    2.60    4.60
 -18   4   8    2.70    5.90
 -16  -4   8   -2.10    5.10
  16  -4  -8   -1.80    5.50
 -16  -4   8    2.10    4.00
 -16  -4   8    5.10    3.20
 -16  -4   8    3.90    5.10
 -16   4   8   -0.30    4.90
 -16   4   8    3.80    6.50
 -16   4   8   -1.20    4.70
 -14  -4   8    2.30    5.20
 -14  -4   8    6.70    3.50
 -14  -4   8   -1.60    4.90
 -14   4   8   11.10   11.40
 -14   4   8   -3.30    5.30
 -14   4   8   10.80    4.80
  14   4  -8    8.70    4.90
  12  -4  -8   30.40   11.60
 -12  -4   8   29.70    4.30
 -12  -4   8   30.40    6.30
 -12  -4   8   19.20    4.10
 -12  -4   8   31.30    6.80
 -12   4   8   27.00    6.00
  12   4  -8   29.60    5.70
 -12   4   8   23.70    6.20
  12   4  -8   17.80    7.40
 -12   4   8   24.70    7.50
  10  -4  -8   -3.00    3.30
 -10  -4   8    9.60    5.90
 -10  -4   8   11.60    3.90
 -10  -4   8    0.10    5.10
  10  -4  -8    4.50    5.30
  10   4  -8    9.20    4.70
 -10   4   8   -1.20    5.30
 -10   4   8    7.50    5.20
 -10   4   8    2.00    4.60
  10   4  -8    3.10    4.20
   8  -4  -8  163.08   11.30
   8  -4  -8  149.49    7.20
  -8  -4   8  153.48   11.60
   8  -4  -8  160.58    7.80
  -8  -4   8  157.18   10.90
  -8   4   8  162.38   10.80
  -8   4   8  153.08   11.40
   8   4  -8  157.08    8.90
  -8   4   8  155.18   10.10
   8   4  -8  170.88    9.30
  -6  -4   8   15.80    5.60
  -6  -4   8   16.00    6.80
   6  -4  -8   18.80    5.40
   6  -4  -8   13.50    3.80
   6  -4  -8   19.30    6.00
   6   4  -8   11.00    3.90
  -6   4   8   12.10    4.90
   6   4  -8   17.10    4.60
  -6   4   8   12.60    5.40
  -6   4   8    9.30    6.30
  -4  -4   8  122.29   11.00
   4  -4  -8  118.89   10.60
  -4  -4   8  131.09    9.90
   4  -4  -8  145.99    7.80
   4  -4  -8  111.39   10.10
   4  -4  -8  136.39    7.70
  -4   4   8  138.59   10.40
   4   4  -8  124.89    7.60
  -4   4   8  120.49    9.30
  -4   4   8  128.59   10.50
   4   4  -8  118.59    7.30
   2  -4  -8   -0.60    5.80
   2  -4  -8   -0.10    3.30
   2  -4  -8    2.40    3.30
   2  -4  -8   -6.90    3.40
  -2  -4   8    0.70    5.10
  -2  -4   8   -4.50    5.30
  -2   4   8    8.00    5.60
  -2   4   8    0.90    4.70
   2   4  -8   -2.20    2.90
   2   4  -8    4.90    3.90
  -2   4   8    1.50    4.90
   0  -4  -8    4.60    3.60
   0  -4  -8    2.60    3.50
   0  -4   8    3.40    5.60
   0  -4   8    2.90    5.30
   0  -4  -8    1.80    5.60
   0   4   8    2.30    5.20
   0   4   8    2.90    4.30
   0   4  -8    7.20    3.10
   0   4   8   -2.60    4.70
   0   4   8   -0.30    5.40
   0   4   8    7.00    5.20
   2  -4   8   48.20    7.60
  -2  -4  -8   55.99    6.40
   2  -4   8   43.20    7.90
  -2  -4  -8   55.59    6.20
   2   4   8   51.39    7.90
   2   4   8   47.20    7.90
   2   4   8   50.59    8.00
   4  -4   8   58.39    8.80
  -4  -4  -8   66.29    7.50
   4  -4   8   54.69    7.30
  -4  -4  -8   55.39    6.60
   4   4   8   45.50    7.80
   4   4   8   64.19    9.20
   4   4   8   59.69    8.50
   4   4   8   71.99    8.40
  -6  -4  -8   89.09    8.30
   6  -4   8   76.29    8.50
   6  -4   8   82.69    9.90
  -6  -4  -8   79.79    7.90
   6   4   8   89.49    9.70
   6   4   8   98.69    9.90
  -8  -4  -8   21.60    5.60
  -8  -4  -8   30.00    6.50
   8  -4   8   21.60    6.70
   8   4   8   29.00    7.20
   8   4   8   31.50    7.80
   8   4   8   21.60    6.70
 -10  -4  -8   34.10    6.50
 -10  -4  -8   25.10    6.10
  10   4   8   50.19   10.70
  10   4   8   30.90    8.90
  10   4   8   19.50    6.70
 -12  -4  -8   19.60    6.20
 -12  -4  -8    8.90    6.30
  12   4   8   15.50    6.50
  12   4   8    9.10    6.90
  12   4   8   13.30    7.20
 -14  -4  -8   92.99   10.50
 -14  -4  -8  123.89   11.10
  14   4   8   95.69   10.90
  14   4   8  105.29   11.80
  14   4   8  114.09   11.20
 -16  -4  -8   -1.40    6.90
  16   4   8    4.80    5.60
  16   4   8    5.80    6.80
  16   4   8    1.30    6.40
 -16   4  -8    1.90    5.10
 -18  -4  -8    8.10   11.70
 -18  -4  -8  -23.00   13.20
 -18  -4  -8   11.10    7.00
  18   4   8   -2.00    6.20
  18   4   8  -13.00    5.30
  18   4   8   -3.40    6.60
 -18   4  -8   28.00    7.80
 -19  -5   8   18.10    7.00
  19  -5  -8   23.70    7.30
 -19  -5   8   18.90    7.80
 -19   5   8   19.40    5.90
 -19   5   8   12.90    6.60
 -19   5   8   10.30    7.10
  17  -5  -8   12.30    6.70
 -17  -5   8   11.10    7.20
 -17  -5   8   11.50    6.30
 -17   5   8   13.90    6.40
 -17   5   8   29.80    9.80
 -17   5   8   10.20    5.00
 -15  -5   8   30.00    7.60
  15  -5  -8   20.80    7.20
 -15  -5   8   36.90    8.90
 -15   5   8   27.10    6.40
 -15   5   8   35.20    9.10
 -15   5   8   27.80    6.60
  13  -5  -8    6.40    6.80
 -13  -5   8   11.70    8.80
 -13  -5   8   11.20    6.90
 -13   5   8    6.50    5.80
 -13   5   8   -6.80    6.90
 -13   5   8    7.80    4.80
  11  -5  -8   11.10    7.00
 -11  -5   8    9.20    6.90
 -11  -5   8   22.80    7.40
 -11   5   8    7.20    6.20
 -11   5   8   20.90    7.40
 -11   5   8   11.70    5.50
  -9  -5   8    7.90    5.90
   9  -5  -8    6.90    4.20
  -9  -5   8   -0.70    6.10
   9  -5  -8   -6.40    5.10
  -9   5   8    4.40    5.30
  -9   5   8   11.70    5.80
  -9   5   8    5.90    7.20
   7  -5  -8    1.80    3.70
  -7  -5   8   -3.90    6.20
   7  -5  -8   11.70    6.70
  -7  -5   8   21.30    8.90
  -7   5   8    9.00    6.20
  -7   5   8   13.50    6.00
  -7   5   8   18.10    7.40
   7   5  -8    1.30    8.20
  -5  -5   8  160.68   12.30
   5  -5  -8  150.78    9.10
   5  -5  -8  149.49   13.10
  -5  -5   8  143.39   13.10
  -5   5   8  152.98   11.80
  -5   5   8  153.58   11.10
   5   5  -8  165.48    9.50
  -5   5   8  123.89   12.20
  -3  -5   8   -0.90    6.00
   3  -5  -8   -2.50    6.60
  -3  -5   8   15.60    7.10
   3  -5  -8   -2.10    3.90
  -3   5   8    0.60    6.00
  -3   5   8   10.70    6.10
   3   5  -8   16.20    5.40
  -3   5   8    3.10    6.10
   1  -5  -8   41.30    6.00
   1  -5  -8   44.20    9.80
  -1  -5   8   30.60    8.50
  -1  -5   8   37.50    8.00
  -1   5   8   48.20    8.90
  -1   5   8   41.40    7.40
   1   5  -8   39.60    4.50
  -1   5   8   45.50    7.70
  -1  -5  -8    6.20    4.90
   1  -5   8   -0.10    7.30
   1  -5   8   -1.10    5.60
  -1  -5  -8   11.60    6.90
   1   5   8   -1.20    6.30
   1   5   8   10.90    6.10
   1   5   8    1.00    5.60
  -3  -5  -8    9.80    7.20
   3  -5   8    3.40    6.90
   3  -5   8    3.20    6.10
  -3  -5  -8    4.10    5.40
   3   5   8    5.00    6.40
   3   5   8    3.20    6.60
   3   5   8    4.40    5.60
   5  -5   8   20.30    8.10
   5  -5   8   12.90    8.40
  -5  -5  -8   12.70    9.10
  -5  -5  -8   12.60    5.60
   5   5   8   15.00    6.80
   5   5   8   21.10    7.30
   5   5   8    8.80    6.80
  -7  -5  -8    9.20    5.30
  -7  -5  -8  -10.00    7.10
   7  -5   8   -2.10    6.20
   7  -5   8   -2.10    5.90
   7   5   8    4.10    6.90
   7   5   8   -2.00    6.50
   7   5   8    1.10    6.30
   9   5   8   10.50    7.40
   9   5   8   11.20    7.10
   9   5   8    2.50    6.50
 -11  -5  -8   25.70    9.60
  11   5   8   21.30    8.40
  11   5   8   18.80    7.90
  11   5   8   18.50    8.60
 -34   0   9   30.60    7.50
 -32   0   9   -0.50    5.70
 -32   0   9    2.90    5.90
 -30   0   9    1.00    5.70
 -30   0   9   -0.20    5.60
 -28   0   9    5.00    5.40
 -28   0   9    1.20    5.90
 -26   0   9   13.40    5.60
 -26   0   9   10.50    5.10
 -24   0   9    1.40    5.00
 -24   0   9    2.30    4.50
 -22   0   9    1.30    4.30
 -22   0   9    1.30    4.30
 -20   0   9   -6.00    4.20
 -20   0   9   -4.90    4.10
 -18   0   9   -1.90    4.60
 -18   0   9    3.40    4.00
  16   0  -9    0.70    2.50
 -16   0   9    1.20    3.70
 -14   0   9    0.70    3.40
  14   0  -9    2.50    2.80
 -14   0   9    4.40    3.70
  14   0  -9    2.40    2.80
  12   0  -9    0.10    1.80
 -12   0   9    0.30    3.00
  12   0  -9    2.40    2.80
 -12   0   9   -3.10    2.80
  12   0  -9    2.90    2.40
 -10   0   9    2.90    3.10
  10   0  -9   -0.80    2.50
  10   0  -9    2.20    2.00
 -10   0   9   -0.80    2.70
  10   0  -9    0.70    2.30
  -8   0   9   -0.50    2.80
  -8   0   9    6.70    3.10
   8   0  -9   -3.70    2.10
  -8   0   9   -0.80    2.20
   8   0  -9   -3.10    2.30
  -6   0   9    0.90    2.60
  -6   0   9   -0.60    2.30
   6   0  -9    2.00    2.40
   6   0  -9    2.60    2.60
  -6   0   9    0.70    2.60
  -4   0   9   -1.90    2.10
   4   0  -9    0.40    2.50
   4   0  -9   -0.50    1.70
   4   0  -9    2.00    2.90
  -4   0   9   -2.10    2.60
  -4   0   9    0.70    2.70
  -2   0   9   -0.30    2.40
   2   0  -9   -1.10    2.50
   2   0  -9    2.90    2.50
   2   0  -9   -1.00    2.50
  -2   0   9    2.20    2.20
   2   0  -9    2.30    2.30
  -2   0   9    1.20    2.70
   0   0   9    0.00    2.70
   0   0  -9   -2.10    2.40
   0   0  -9   -1.90    1.80
   0   0   9    0.00    2.40
   0   0  -9    0.30    1.70
   0   0  -9    1.50    2.40
   0   0  -9   -2.60    2.40
   0   0  -9    2.70    2.70
   0   0   9   -0.80    2.20
   2   0   9    1.60    2.30
  -2   0  -9    0.10    2.60
  -2   0  -9   -1.40    2.60
  -2   0  -9    0.10    2.10
  -2   0  -9   -1.00    2.40
   2   0   9    2.70    2.70
  -2   0  -9    0.30    2.50
   2   0   9   -2.00    2.50
   4   0   9   -3.30    2.50
   4   0   9   -4.70    2.50
  -4   0  -9    0.70    2.90
  -4   0  -9   -1.80    2.30
   4   0   9   -1.20    2.60
  -4   0  -9   -0.90    2.70
  -4   0  -9   -0.30    2.80
  -4   0  -9    1.00    2.60
  -6   0  -9    1.20    2.90
   6   0   9   -0.40    2.60
  -6   0  -9    2.60    3.20
   6   0   9    2.70    2.80
  -6   0  -9    5.10    3.00
  -6   0  -9    2.40    3.30
  -8   0  -9    1.10    3.00
   8   0   9    5.90    3.60
  -8   0  -9   -2.40    2.90
   8   0   9   -1.30    2.80
  -8   0  -9   -3.60    3.10
  -8   0  -9   -4.00    3.30
   8   0   9   -0.90    3.20
  -8   0  -9    3.30    3.00
 -10   0  -9   -1.10    2.90
 -10   0  -9    0.00    3.70
 -10   0  -9    7.90    7.20
  10   0   9    3.90    3.30
  10   0   9   -1.90    2.90
 -10   0  -9   -3.70    3.40
 -10   0  -9    0.10    3.30
 -12   0  -9   -3.90    3.40
 -12   0  -9   -0.40    3.40
 -12   0  -9   -1.40    3.70
 -12   0  -9    4.50    3.60
  12   0   9   -0.60    2.90
  12   0   9    5.90    3.50
  14   0   9   -0.70    3.70
 -14   0  -9    4.30    4.20
 -14   0  -9    3.00    4.30
  14   0   9   -1.30    2.90
 -14   0  -9   -4.20    4.00
 -14   0  -9   -2.40    3.80
  16   0   9    0.60    2.20
 -16   0  -9   -1.50    4.40
 -16   0  -9    7.20    4.80
 -16   0  -9    5.90    4.90
 -16   0  -9    2.20    4.40
  16   0   9   -1.90    3.40
 -18   0  -9    1.80    5.00
 -18   0  -9   -3.70    5.30
 -18   0  -9   -2.20    4.80
 -20   0  -9   -0.20    5.50
 -20   0  -9   -3.60    5.30
 -22   0  -9    0.40    5.40
 -22   0  -9    7.90    6.20
 -24   0  -9    5.40    6.00
 -24   0  -9   13.80    5.60
 -26   0  -9   -3.80    6.40
 -26   0  -9   -4.50    6.30
 -33  -1   9   51.89    8.70
 -33  -1   9   54.39    5.90
 -33  -1   9   66.69    9.30
 -33   1   9   83.69   10.40
 -31  -1   9   -1.50    3.90
 -31  -1   9   -0.90    4.90
 -31  -1   9   12.50    6.90
 -31   1   9    9.80    5.70
 -31   1   9    2.30    6.10
 -29  -1   9    5.80    5.60
 -29  -1   9    0.60    5.80
 -29   1   9    4.90    5.30
 -29   1   9    6.00    4.90
 -27  -1   9   38.50    7.40
 -27  -1   9   46.40    8.00
 -27   1   9   35.80    6.70
 -25  -1   9   52.89    5.40
 -25  -1   9   48.30    7.30
 -25  -1   9   43.50    6.90
 -25   1   9   35.90    6.80
 -25   1   9   32.60    6.60
 -23  -1   9   38.60    4.70
 -23  -1   9   48.70    7.50
 -23  -1   9   42.70    6.90
 -23   1   9   43.20    6.90
 -23   1   9   44.10    6.90
 -21  -1   9   21.90    6.50
 -21  -1   9   26.20    5.60
 -21  -1   9   26.20    4.00
 -21   1   9   18.30    5.40
 -21   1   9   27.30    5.40
 -19  -1   9   75.79    7.60
 -19  -1   9   65.99    7.90
 -19  -1   9   68.59    5.20
 -19  -1   9   72.39    8.00
 -19   1   9   77.19    7.40
 -19   1   9   71.79    7.60
 -17  -1   9   78.89    7.90
 -17  -1   9   91.69    5.40
 -17  -1   9   88.39    7.70
 -17  -1   9   91.49    7.50
 -17   1   9   98.29    7.60
 -17   1   9  108.49    8.30
  17   1  -9   91.39    8.40
 -15  -1   9    0.20    3.20
 -15  -1   9   -1.20    3.40
 -15  -1   9    3.10    3.70
 -15  -1   9   -3.30    2.50
  15   1  -9    5.90    3.10
 -15   1   9   -5.80    3.30
 -15   1   9    1.30    4.10
  15   1  -9    1.10    3.20
  15   1  -9    6.40    3.20
 -13  -1   9   59.39    6.20
 -13  -1   9   42.70    4.10
  13  -1  -9   42.10    4.70
  13  -1  -9   39.40    4.40
 -13  -1   9   47.50    4.50
 -13  -1   9   53.19    5.60
 -13   1   9   57.19    6.50
  13   1  -9   46.50    4.90
  13   1  -9   54.19    5.80
  13   1  -9   58.29    5.00
  11  -1  -9  152.98    7.30
 -11  -1   9  150.48    7.90
 -11  -1   9  152.18    6.50
 -11  -1   9  146.39    6.40
 -11  -1   9  145.49    8.00
 -11   1   9  156.28    8.50
  11   1  -9  168.58    8.20
 -11   1   9  172.28    8.50
  -9  -1   9   45.40    5.00
   9  -1  -9   41.40    4.40
  -9  -1   9   39.60    3.90
  -9  -1   9   49.90    5.20
  -9   1   9   44.20    5.10
  -9   1   9   44.00    5.30
  -9   1   9   48.70    5.20
   9   1  -9   40.60    4.40
  -7  -1   9   65.99    5.30
   7  -1  -9   71.89    5.50
   7  -1  -9   66.49    4.90
   7  -1  -9   60.59    5.00
   7  -1  -9   62.39    5.30
  -7  -1   9   75.49    5.20
  -7  -1   9   68.29    4.50
  -7   1   9   69.59    5.40
  -7   1   9   61.59    5.50
   7   1  -9   67.49    3.90
   7   1  -9   65.09    5.10
  -7   1   9   65.79    5.80
   7   1  -9   59.19    4.80
  -5  -1   9   40.60    4.20
   5  -1  -9   38.80    4.50
  -5  -1   9   45.60    4.10
   5  -1  -9   42.20    4.50
   5  -1  -9   49.20    5.00
  -5  -1   9   39.00    4.30
   5  -1  -9   53.99    5.40
  -5   1   9   49.00    4.90
   5   1  -9   41.80    3.40
  -5   1   9   49.00    5.30
  -5   1   9   43.50    4.80
   5   1  -9   36.80    4.40
  -3  -1   9  387.06   12.60
  -3  -1   9  400.76   12.70
   3  -1  -9  381.66   13.40
  -3  -1   9  355.36   12.60
   3  -1  -9  381.86   13.30
   3  -1  -9  387.76   13.60
   3   1  -9  398.66   13.20
  -3   1   9  387.66   14.00
  -3   1   9  382.96   13.50
  -3   1   9  400.86   13.40
   3   1  -9  385.56   12.80
   1  -1  -9   96.99    6.20
   1  -1  -9   86.79    6.00
   1  -1  -9   94.29    6.10
  -1  -1   9   88.69    5.50
   1  -1  -9   91.39    5.80
   1  -1  -9   93.89    6.10
   1   1  -9   90.39    5.60
  -1   1   9   89.89    6.40
  -1   1   9  103.49    6.20
  -1   1   9   96.79    6.40
   1   1  -9   94.99    5.50
  -1  -1  -9   27.60    3.90
  -1  -1  -9   15.90    3.70
  -1  -1  -9   20.30    3.90
   1  -1   9   19.60    3.00
   1  -1   9   22.20    3.10
  -1  -1  -9   18.80    3.60
  -1  -1  -9   21.10    3.80
  -1   1  -9   20.30    3.40
  -1   1  -9   25.30    3.80
  -1   1  -9   19.90    3.40
   1   1   9   22.00    4.30
  -1   1  -9   22.50    3.40
   1   1   9   28.60    4.40
   1   1   9   25.60    4.10
  -3  -1  -9   90.69    6.40
  -3  -1  -9   83.09    5.50
   3  -1   9   95.09    5.00
  -3  -1  -9   94.69    6.40
  -3  -1  -9   96.29    6.40
  -3  -1  -9   92.19    6.10
   3  -1   9   86.99    4.90
   3   1   9   97.19    6.50
  -3   1  -9   82.29    5.40
  -3   1  -9   82.59    5.50
   3   1   9   80.09    6.50
  -3   1  -9   92.39    5.70
   3   1   9   72.89    6.20
   3   1   9   90.29    6.00
  -3   1  -9   89.99    5.40
   5  -1   9   65.09    4.00
  -5  -1  -9   64.79    6.00
  -5  -1  -9   70.19    6.00
   5  -1   9   72.29    4.50
  -5  -1  -9   60.59    6.00
  -5   1  -9   66.69    4.20
   5   1   9   63.09    5.60
  -5   1  -9   67.99    5.40
  -5   1  -9   74.59    5.20
  -5   1  -9   72.49    5.50
   5   1   9   68.29    6.30
   5   1   9   70.39    6.30
   5   1   9   63.99    6.20
   5   1   9   71.19    5.70
  -7  -1  -9  228.28   10.60
  -7  -1  -9  245.08   11.80
  -7  -1  -9  243.88   11.00
  -7  -1  -9  229.98   10.00
   7  -1   9  222.48    8.70
  -7   1  -9  245.18   10.00
  -7   1  -9  229.48    9.80
  -7   1  -9  215.98    9.40
   7   1   9  259.67   11.90
  -7   1  -9  236.68    9.50
   7   1   9  237.48   11.00
  -7   1  -9  222.98    8.90
   7   1   9  252.87   10.70
  -9  -1  -9  184.18    9.50
  -9  -1  -9  186.08    9.70
   9  -1   9  186.58    7.50
  -9  -1  -9  183.68    9.80
  -9  -1  -9  173.98    9.90
  -9   1  -9  175.78    8.60
   9   1   9  172.58    9.30
  -9   1  -9  190.88    8.50
   9   1   9  173.78    9.60
  -9   1  -9  185.38    8.40
   9   1   9  179.18    9.80
  -9   1  -9  185.68    8.80
  -9   1  -9  167.98    8.00
  11  -1   9  103.09    6.40
 -11  -1  -9  114.59   12.50
 -11  -1  -9  106.79    8.10
 -11  -1  -9  105.59    8.30
 -11  -1  -9  114.09    8.30
 -11   1  -9  110.69    7.20
 -11   1  -9  119.09    7.30
 -11   1  -9   80.99    9.40
  11   1   9   97.59    8.10
 -11   1  -9  122.59    6.90
  11   1   9   98.59    8.40
 -11   1  -9  112.89    7.50
  11   1   9  111.89    7.90
 -13  -1  -9   -2.70    4.20
 -13  -1  -9    2.90    4.30
 -13   1  -9   -0.10    3.50
 -13   1  -9    4.60    3.60
  13   1   9    3.00    4.00
  13   1   9    2.60    3.80
 -13   1  -9    2.00    4.00
 -13   1  -9   -0.70    3.80
  13   1   9   -9.10    4.10
 -15  -1  -9   14.40    5.20
 -15  -1  -9   12.10    5.10
 -15  -1  -9    5.30    4.90
 -15   1  -9    6.20    3.90
  15   1   9    3.50    4.20
  15   1   9    7.10    4.30
 -15   1  -9    7.10    4.20
 -15   1  -9    3.30    4.20
 -15   1  -9    8.40    4.70
 -17  -1  -9   28.30    6.20
 -17  -1  -9   38.30    6.90
 -17   1  -9   39.50    6.30
 -17   1  -9   35.80    5.40
  17   1   9   20.00    5.90
 -17   1  -9   34.40    5.60
 -17   1  -9   38.10    6.30
  17   1   9   28.10    5.40
 -19  -1  -9    2.00    5.30
 -19  -1  -9    0.90    5.50
  19   1   9   15.10    4.80
 -19   1  -9   10.00    5.00
  19   1   9    1.20    3.90
 -19   1  -9    8.30    5.20
 -19   1  -9    3.70    5.10
 -21  -1  -9   31.50    7.60
 -21  -1  -9   20.60    6.70
 -21   1  -9   24.50    6.60
 -21   1  -9   19.20    6.40
 -23  -1  -9    0.10    6.10
 -23  -1  -9    1.90    5.80
 -23   1  -9   -7.90    5.60
 -23   1  -9    1.60    5.70
 -25  -1  -9   34.60    8.60
 -32  -2   9   10.80    5.20
 -32  -2   9   13.20    7.40
 -32  -2   9   35.80    7.70
 -32   2   9   17.10    6.70
 -32   2   9   18.60   10.10
 -30  -2   9   20.20    6.60
 -30  -2   9   35.10    8.20
 -30   2   9   32.00    7.60
 -30   2   9   27.10    6.70
 -28  -2   9    7.20    5.90
 -28  -2   9    2.30    4.30
 -28   2   9    5.60    5.10
 -28   2   9    4.20    5.40
 -26  -2   9   68.49    8.90
 -26  -2   9   59.19    8.50
 -26  -2   9   71.49    7.40
 -26   2   9   65.69    8.80
 -26   2   9   55.39    7.90
 -24  -2   9   76.79    9.00
 -24  -2   9   86.29    7.50
 -24  -2   9   85.39    8.90
 -24   2   9   97.99   10.30
 -24   2   9   85.29   12.80
 -22  -2   9  123.39    8.80
 -22  -2   9  109.49    9.90
 -22  -2   9  120.69    9.40
 -22   2   9  120.79    9.70
 -22   2   9  157.78   10.00
 -20  -2   9   29.40    5.60
 -20  -2   9   28.40    5.20
 -20  -2   9   38.00    6.30
 -20   2   9   35.60    6.00
 -20   2   9   35.90    6.50
 -18  -2   9    7.20    4.60
 -18  -2   9    9.10    4.10
 -18  -2   9    6.70    4.40
 -18  -2   9    4.90    4.00
  18  -2  -9   13.20    3.80
 -18  -2   9    6.90    3.30
 -18   2   9    8.80    4.50
 -18   2   9    7.90    4.50
  18   2  -9    3.20    4.50
 -16  -2   9    3.60    3.80
  16  -2  -9    8.40    3.70
 -16  -2   9    8.50    4.30
 -16  -2   9    7.80    3.50
  16  -2  -9    4.40    3.40
 -16  -2   9    3.00    4.00
 -16  -2   9    9.20    3.80
  16  -2  -9    7.00    3.20
  16   2  -9    7.50    4.10
 -16   2   9    6.70    4.40
 -16   2   9   14.90    5.00
  16   2  -9    9.80    3.60
 -14  -2   9    5.30    3.80
 -14  -2   9    7.70    3.80
 -14  -2   9    7.50    3.60
 -14  -2   9   12.70    3.90
 -14  -2   9   10.10    2.80
  14  -2  -9    5.30    3.20
  14  -2  -9    7.50    3.60
  14  -2  -9    9.60    3.50
  14   2  -9    4.00    3.60
 -14   2   9    0.70    4.10
 -14   2   9    6.80    4.70
  14   2  -9    2.40    3.40
 -14   2   9    1.00    3.90
  12  -2  -9   23.80    4.50
 -12  -2   9   23.40    4.70
  12  -2  -9   18.50    4.10
 -12  -2   9   31.70    4.70
 -12  -2   9   23.00    4.20
 -12  -2   9   28.90    4.70
 -12   2   9   20.40    5.10
 -12   2   9   25.40    5.40
 -12   2   9   30.00    5.10
  12   2  -9   21.70    4.40
 -10  -2   9   39.20    4.90
  10  -2  -9   37.10    4.70
  10  -2  -9   47.80    5.40
 -10  -2   9   40.00    5.00
 -10  -2   9   39.40    4.70
 -10  -2   9   36.80    4.80
 -10   2   9   42.40    5.80
 -10   2   9   34.20    5.10
  10   2  -9   40.80    5.00
  10   2  -9   32.50    4.70
 -10   2   9   36.40    5.90
   8  -2  -9   54.69    5.50
  -8  -2   9   43.30    4.50
  -8  -2   9   58.59    6.10
   8  -2  -9   45.60    5.10
  -8  -2   9   52.89    5.40
  -8   2   9   47.80    6.50
   8   2  -9   44.50    5.20
  -8   2   9   52.59    5.70
   8   2  -9   46.90    4.90
  -8   2   9   56.69    6.80
   6  -2  -9  500.65   17.60
   6  -2  -9  474.45   16.60
  -6  -2   9  505.55   17.10
  -6  -2   9  499.55   16.20
  -6  -2   9  488.05   15.70
   6  -2  -9  496.95   16.60
  -6  -2   9  480.25   15.40
  -6   2   9  496.55   17.00
   6   2  -9  496.65   16.10
  -6   2   9  438.06   19.40
  -6   2   9  505.25   18.40
   6   2  -9  511.75   16.60
  -4  -2   9  455.25   16.30
   4  -2  -9  447.26   15.70
   4  -2  -9  467.35   15.70
  -4  -2   9  445.36   14.30
  -4  -2   9  474.35   15.50
   4  -2  -9  429.86   15.60
  -4   2   9  449.16   16.60
  -4   2   9  455.15   16.20
   4   2  -9  476.45   15.40
   4   2  -9  467.45   14.90
  -2  -2   9  194.18    7.00
  -2  -2   9  192.78    7.10
   2  -2  -9  185.38    9.00
   2  -2  -9  181.48    8.90
   2  -2  -9  199.38    9.30
  -2  -2   9  210.08    9.10
   2  -2  -9  197.68    9.10
  -2   2   9  201.48    9.90
   2   2  -9  188.98    7.80
   2   2  -9  210.38    8.50
  -2   2   9  193.28   10.40
   0  -2  -9   30.00    5.00
   0  -2   9   25.90    4.50
   0  -2  -9   28.60    5.10
   0  -2  -9   34.10    4.70
   0  -2  -9   24.90    4.60
   0   2   9   28.60    5.10
   0   2   9   28.30    4.80
   0   2   9   30.50    5.30
   0   2  -9   34.00    3.80
   0   2  -9   31.40    3.50
   0   2   9   27.70    5.10
  -2  -2  -9  127.09    7.60
  -2  -2  -9  117.99    7.50
  -2  -2  -9  127.39    7.70
   2  -2   9  121.99    7.30
   2   2   9  127.59    8.20
   2   2   9  132.29    8.50
   2   2   9  122.59    7.60
  -2   2  -9  113.89    7.00
   2   2   9  125.49    8.40
   2   2   9  129.89    7.50
  -2   2  -9  123.49    5.90
  -4  -2  -9   22.40    4.70
  -4  -2  -9   23.70    4.80
  -4  -2  -9   20.60    6.90
   4   2   9   22.60    5.20
   4   2   9   21.50    5.10
   4   2   9   27.00    6.40
  -4   2  -9   16.80    3.10
  -4   2  -9   17.50    3.30
   4   2   9   15.80    5.20
  -4   2  -9   21.70    3.20
  -4   2  -9   21.50    3.60
  -6  -2  -9    4.20    3.80
  -6  -2  -9    6.70    4.10
   6   2   9    8.80    3.70
   6   2   9   10.30    4.40
   6   2   9    6.90    4.70
  -6   2  -9    4.50    3.10
  -6   2  -9   13.10    3.10
  -6   2  -9    4.10    2.80
   6   2   9    7.80    4.40
  -6   2  -9   10.10    2.80
  -8  -2  -9   41.20    6.20
  -8  -2  -9   34.60    5.80
   8   2   9   36.90    5.80
   8   2   9   29.40    6.10
  -8   2  -9   34.80    4.30
  -8   2  -9   40.50    4.60
   8   2   9   43.70    7.10
  -8   2  -9   34.10    4.10
  -8   2  -9   33.50    3.80
 -10  -2  -9   63.19    7.50
 -10  -2  -9   63.59    7.50
  10   2   9   48.40    6.70
 -10   2  -9   54.49    5.40
 -10   2  -9   62.49    4.90
  10   2   9   56.99    7.80
  10   2   9   67.59    9.30
 -10   2  -9   45.90    5.30
 -10   2  -9   48.30    5.10
 -12  -2  -9   25.70    6.20
 -12  -2  -9   23.60    5.70
 -12   2  -9   19.30    3.70
 -12   2  -9   25.20    4.20
  12   2   9   11.30    4.90
 -12   2  -9   22.80    4.20
 -12   2  -9   14.20    4.10
 -12   2  -9   22.60    4.50
  12   2   9   11.60    5.80
 -14  -2  -9    6.20    4.50
 -14  -2  -9   17.90    5.60
 -14   2  -9   11.10    3.40
 -14   2  -9   16.80    3.90
 -14   2  -9    4.30    4.20
  14   2   9   15.10    4.90
  14   2   9    9.20    5.50
 -14   2  -9   11.40    4.20
  14   2   9    7.30    5.20
 -16  -2  -9  136.89   10.50
 -16  -2  -9  134.69   10.70
 -16   2  -9  139.69    8.40
 -16   2  -9  131.59    9.00
 -16   2  -9  120.89    8.00
  16   2   9  124.69   10.30
 -16   2  -9  123.39    7.50
  16   2   9  132.89   11.20
  16   2   9  130.09    9.90
 -18  -2  -9   17.60    6.60
 -18  -2  -9   15.10    6.90
  18   2   9   11.80    5.00
 -18   2  -9   12.20    5.90
 -18   2  -9   10.40    4.90
  18   2   9   16.30    5.60
 -18   2  -9    9.60    4.60
  18   2   9   17.80    6.60
 -20  -2  -9   -0.90    5.80
 -20  -2  -9   -1.00    5.60
  20   2   9   -2.10    5.20
 -20   2  -9   -0.90    4.70
 -20   2  -9    5.90    4.60
  20   2   9    0.20    5.20
 -22  -2  -9   18.20    6.80
 -22  -2  -9   29.90    7.50
 -22   2  -9   32.00    6.20
 -22   2  -9   25.40    6.50
 -24  -2  -9   -2.40    7.30
 -24   2  -9   -1.80   10.40
 -24   2  -9    6.00    5.90
 -29  -3   9    8.40   11.80
 -29  -3   9    5.80    9.50
 -29  -3   9   -2.80    5.90
 -27  -3   9   11.90    6.00
 -27  -3   9   24.60    6.70
 -27  -3   9   10.60    6.60
 -27   3   9   14.10    6.70
 -27   3   9   12.40    5.90
 -25  -3   9   14.70    7.20
 -25  -3   9   17.50    5.90
 -25  -3   9   14.80    6.00
 -25   3   9   20.80    6.40
 -25   3   9   11.90    6.40
 -23  -3   9    5.70    4.90
 -23  -3   9    0.10    4.10
 -23  -3   9   14.00    5.40
 -23  -3   9   -1.30    4.40
 -23   3   9    8.20    5.70
 -23   3   9    4.80    6.30
 -23   3   9   -8.70    4.50
  21  -3  -9  156.68    7.60
 -21  -3   9  153.78   10.40
 -21  -3   9  151.68    9.10
 -21  -3   9  170.78   10.30
  21  -3  -9  158.08    8.20
 -21  -3   9  148.39   10.10
 -21   3   9  142.39   11.60
 -21   3   9  133.29   12.00
 -21   3   9  158.98   10.80
  19  -3  -9   22.80    4.10
 -19  -3   9   13.60    4.70
  19  -3  -9   17.40    3.90
 -19  -3   9   23.00    5.40
  19  -3  -9   21.00    4.30
 -19  -3   9   25.00    6.10
 -19  -3   9   28.70    5.60
 -19   3   9   25.30    5.80
 -19   3   9   23.00    6.00
  19   3  -9    4.20    6.00
 -19   3   9   27.50    7.70
 -17  -3   9   74.89    7.30
  17  -3  -9   86.69    6.60
 -17  -3   9   84.19    8.20
  17  -3  -9   85.19    7.00
 -17  -3   9   94.99    8.20
 -17  -3   9   67.49    6.70
 -17  -3   9   94.39    7.70
 -17   3   9   85.69    8.40
  17   3  -9   78.69    8.60
 -17   3   9   92.49    9.80
 -17   3   9   83.09    7.70
  15  -3  -9    9.40    3.20
 -15  -3   9   11.60    3.70
  15  -3  -9    5.50    2.90
  15  -3  -9    5.70    3.90
 -15  -3   9   -4.20    3.80
 -15  -3   9    6.50    3.60
 -15  -3   9    9.10    3.90
 -15  -3   9    5.70    4.60
 -15   3   9    4.00    5.30
 -15   3   9   10.80    5.00
  15   3  -9   15.80    5.40
 -15   3   9    2.30    4.40
  15   3  -9    9.40    4.80
 -13  -3   9   30.10    5.80
  13  -3  -9   34.60    5.60
 -13  -3   9   34.20    4.40
  13  -3  -9   29.20    4.20
 -13  -3   9   36.90    5.90
 -13   3   9   30.50    6.50
  13   3  -9   26.10    4.70
 -13   3   9   21.10    5.50
  13   3  -9   29.00    7.20
 -13   3   9   29.30    5.50
  11  -3  -9   45.30    5.10
  11  -3  -9   44.10    5.00
 -11  -3   9   41.50    6.50
  11  -3  -9   52.99    6.70
 -11  -3   9   42.00    4.80
 -11  -3   9   48.30    5.70
  11   3  -9   50.49    5.60
 -11   3   9   44.90    6.30
 -11   3   9   41.50    7.30
  11   3  -9   53.69    6.50
 -11   3   9   32.40    5.90
  -9  -3   9    3.50    2.70
  -9  -3   9    0.60    1.50
  -9  -3   9    9.60    4.40
   9  -3  -9    2.60    3.20
  -9  -3   9    4.90    4.80
   9   3  -9    5.10    3.60
  -9   3   9   -2.70    3.90
  -9   3   9    1.40    5.00
   9   3  -9    2.70    3.10
  -9   3   9    4.90    4.10
   7  -3  -9  269.87   10.70
  -7  -3   9  257.17   12.40
  -7  -3   9  245.18   11.40
  -7  -3   9  236.18    8.80
  -7  -3   9  239.48    9.10
   7   3  -9  247.68   10.40
  -7   3   9  254.07   11.60
   7   3  -9  249.28   10.70
  -7   3   9  265.47   12.30
  -7   3   9  255.77   12.70
   5  -3  -9   23.40    4.50
   5  -3  -9   14.50    3.80
   5  -3  -9   14.20    3.40
  -5  -3   9   23.40    6.10
  -5  -3   9   20.10    5.20
  -5   3   9   18.50    5.40
  -5   3   9   21.60    5.40
   5   3  -9   17.10    3.60
  -5   3   9   17.80    4.80
   5   3  -9   19.70    4.00
  -3  -3   9   64.09    6.90
   3  -3  -9   60.09    6.10
   3  -3  -9   55.59    5.80
  -3  -3   9   54.19    7.10
  -3   3   9   66.29    7.20
   3   3  -9   66.89    5.30
   3   3  -9   55.59    4.90
  -3   3   9   59.39    7.20
  -3   3   9   61.59    7.90
   1  -3  -9    3.80    3.50
   1  -3  -9    6.60    3.80
  -1  -3   9    9.60    5.20
  -1   3   9   13.00    5.10
  -1   3   9    7.70    4.20
   1   3  -9    8.20    3.10
  -1   3   9    0.60    4.30
  -1   3   9    6.50    4.90
  -1   3   9   12.30    3.70
   1   3  -9    4.90    2.80
   1  -3   9    4.30    4.10
   1  -3   9   -0.60    4.70
  -1  -3  -9   -0.80    3.30
  -1  -3  -9    7.60    3.60
   1   3   9    2.80    4.00
   1   3   9    4.40    3.60
  -1   3  -9    4.50    2.40
   1   3   9   -7.60    3.80
   1   3   9    3.50    4.90
  -1   3  -9   -0.90    2.60
   1   3   9   -3.80    4.10
  -3  -3  -9   99.89    7.90
   3  -3   9  118.59    8.60
  -3  -3  -9  104.29    8.00
   3   3   9  118.79    9.50
   3   3   9  118.79    9.40
   3   3   9  109.99    9.20
  -3   3  -9  115.89    5.90
   3   3   9  120.19    8.40
  -5  -3  -9    4.60    4.30
   5  -3   9   12.60    4.90
  -5  -3  -9    6.50    4.40
   5   3   9    1.10    4.20
   5   3   9    4.80    5.30
   5   3   9    2.30    4.70
  -5   3  -9    8.30    2.70
   5   3   9    7.10    5.00
  -5   3  -9    6.10    2.60
  -7  -3  -9    7.10    4.40
  -7  -3  -9    8.20    4.40
  -7   3  -9    3.40    2.20
   7   3   9    4.20    5.30
  -7   3  -9    6.50    2.60
   7   3   9    0.80    4.60
   7   3   9   11.90    5.20
  -9  -3  -9    7.90    4.50
  -9  -3  -9    5.70    4.80
   9   3   9   -1.40    4.60
  -9   3  -9    7.20    2.50
  -9   3  -9    1.90    2.80
   9   3   9    3.60    5.00
   9   3   9   10.70    6.40
 -11  -3  -9   12.90    5.10
 -11  -3  -9   17.10    5.70
 -11   3  -9   21.10    3.30
 -11   3  -9   18.50    3.60
  11   3   9   21.10    6.20
  11   3   9   16.00    6.30
  11   3   9   14.00    5.80
 -13  -3  -9  115.19    9.90
 -13  -3  -9  113.79   10.00
  13   3   9  113.49   10.10
  13   3   9  116.29   11.30
  13   3   9  123.59   10.70
 -15  -3  -9   36.60    7.20
 -15  -3  -9   36.90    7.40
  15   3   9   30.30    7.80
  15   3   9   27.40    7.40
 -15   3  -9   34.50    4.30
 -15   3  -9   27.60    4.30
 -17  -3  -9    4.00    5.80
 -17  -3  -9    4.00    6.00
  17   3   9    2.50    5.00
  17   3   9   -2.90    6.10
 -17   3  -9    0.70    3.20
 -17   3  -9    5.10    3.90
  17   3   9   -5.60    5.80
 -19  -3  -9   11.50    6.20
  19   3   9   -8.60    6.10
  19   3   9   15.50    7.60
 -19   3  -9    2.10    4.10
 -19   3  -9   -6.10    3.30
  19   3   9    5.80    6.20
 -21  -3  -9   37.50    7.20
 -21  -3  -9   28.40    7.90
  21   3   9   18.70    8.00
 -21   3  -9   32.30    5.40
 -26  -4   9    9.20    6.90
 -24  -4   9   14.10    5.40
 -24  -4   9    0.50    5.70
 -24   4   9   11.50    7.60
 -24   4   9   21.10    5.60
 -24   4   9    0.90    5.90
 -22  -4   9   27.90    6.20
 -22  -4   9   20.10    6.20
  22  -4  -9   17.40    5.50
 -22  -4   9   31.90    7.10
 -22   4   9   24.40    6.10
 -22   4   9   20.70    7.60
 -22   4   9   33.50    7.20
  20  -4  -9   10.90    5.00
 -20  -4   9    6.70    5.30
 -20  -4   9    0.20    6.10
 -20  -4   9    4.90    4.60
 -20   4   9    7.20    5.40
 -20   4   9   11.50    5.20
 -20   4   9   -1.30    6.00
 -18  -4   9   21.00    6.90
 -18  -4   9   20.70    6.30
 -18  -4   9   16.70    4.60
 -18   4   9   21.90    7.10
 -18   4   9   32.40    7.00
 -18   4   9   28.90    5.90
 -16  -4   9    2.60    5.60
 -16  -4   9  -11.50    5.00
  16  -4  -9    5.90    5.30
 -16  -4   9    4.00    3.60
 -16   4   9   -3.10    6.10
 -16   4   9    2.20    5.00
 -16   4   9    8.70    5.10
  14  -4  -9   27.00    6.00
 -14  -4   9   23.90    4.90
 -14  -4   9   21.90    6.30
 -14  -4   9   13.10    3.50
 -14  -4   9   23.30    6.10
 -14   4   9   21.10    6.50
 -14   4   9   19.70    7.20
 -14   4   9   23.50    5.90
 -12  -4   9    4.20    5.50
 -12  -4   9   12.70    5.80
 -12  -4   9    6.20    2.80
  12  -4  -9    2.40    5.30
 -12  -4   9   -4.70    5.40
 -12   4   9    1.80    5.90
 -12   4   9   -1.70    7.70
  12   4  -9    0.20    4.30
  12   4  -9   16.00    6.10
  10  -4  -9   10.10    3.00
 -10  -4   9   11.00    6.40
  10  -4  -9    8.40    5.50
 -10  -4   9   11.30    6.00
 -10   4   9    9.00    6.10
  10   4  -9    9.00    4.50
 -10   4   9   -5.50    4.30
 -10   4   9    9.20    5.20
  10   4  -9    8.40    4.40
   8  -4  -9   13.50    3.80
   8  -4  -9   27.50    6.40
  -8  -4   9   14.60    5.80
  -8  -4   9   15.80    6.00
  -8   4   9   14.10    5.50
  -8   4   9   18.10    6.40
   8   4  -9   24.60    4.80
   8   4  -9   23.60    4.80
  -8   4   9   14.40    5.90
  -6  -4   9   37.30    6.90
   6  -4  -9   40.10    7.00
   6  -4  -9   44.30    4.90
  -6  -4   9   47.30    7.80
   6  -4  -9   48.30    5.40
  -6   4   9   41.90    7.30
   6   4  -9   42.60    5.50
  -6   4   9   43.50    6.70
  -6   4   9   33.40    7.70
   6   4  -9   27.70    5.10
  -4  -4   9   21.70    6.30
   4  -4  -9   26.10    7.30
   4  -4  -9   25.10    4.40
   4  -4  -9   29.80    4.80
  -4  -4   9   18.50    6.50
   4  -4  -9   17.90    4.50
   4   4  -9   22.80    4.50
  -4   4   9   21.10    6.20
  -4   4   9   18.40    6.00
  -4   4   9   19.60    7.00
   4   4  -9   15.10    3.60
   2  -4  -9    4.20    5.60
   2  -4  -9    6.90    5.70
   2  -4  -9    3.00    3.70
   2  -4  -9    8.00    3.80
  -2  -4   9    9.80    6.10
  -2  -4   9   -1.00    5.10
   2   4  -9   10.80    3.50
  -2   4   9    7.70    5.10
  -2   4   9   -0.20    5.00
  -2   4   9    8.90    6.30
   0  -4   9   -0.10    5.10
   0  -4  -9    9.70    4.10
   0  -4   9    3.10    6.20
   0  -4  -9    5.60    4.10
   0   4   9   13.40    6.10
   0   4   9   10.90    5.60
   0   4   9   -6.10    5.20
   0   4  -9   15.10    3.50
   0   4   9   15.00    6.70
   2  -4   9   -3.10    5.90
  -2  -4  -9    2.90    4.10
   2  -4   9   -6.60    5.00
  -2  -4  -9    1.10    3.80
   2   4   9    1.10    4.80
   2   4   9    0.20    5.40
   2   4   9    4.20    5.30
   2   4   9    1.40    5.60
   4  -4   9   12.70    6.70
   4  -4   9   10.80    5.90
  -4  -4  -9    8.60    4.20
  -4  -4  -9   12.30    4.80
   4   4   9   11.20    7.80
   4   4   9    6.70    6.70
   4   4   9    7.50    5.80
  -6  -4  -9   17.50    5.30
  -6  -4  -9   13.30    4.50
   6  -4   9   10.60    5.70
   6   4   9   16.00    7.20
   6   4   9    5.40    5.70
   6   4   9   10.10    7.00
  -8  -4  -9    2.20    4.60
  -8  -4  -9   -3.00    4.70
   8   4   9    5.50    5.10
   8   4   9    0.70    6.20
   8   4   9    0.50    6.00
 -10  -4  -9    1.20    4.90
 -10  -4  -9    4.50    5.60
  10   4   9   -0.30    6.50
  10   4   9    8.00    6.10
  10   4   9    5.90    6.10
 -12  -4  -9   11.40    6.00
 -12  -4  -9   -6.20    6.00
  12   4   9    7.70    6.80
  12   4   9    3.20    6.80
  12   4   9    5.00    6.20
 -14  -4  -9    0.10    6.00
 -14  -4  -9   16.40    7.20
  14   4   9   -3.60    5.80
  14   4   9    5.30    6.70
  14   4   9    7.10    6.30
 -16  -4  -9   28.90    7.50
 -16  -4  -9   22.50    9.60
  16   4   9   26.40    8.30
  16   4   9   31.30    7.50
 -19  -5   9    1.00    6.20
 -17  -5   9    2.60    6.40
  17  -5  -9   10.80    6.50
 -17  -5   9    2.60    6.50
 -17   5   9   -2.70    5.10
 -15  -5   9    9.60    6.70
 -15  -5   9    8.60    6.90
  15  -5  -9   -0.80    5.50
 -15   5   9   11.80    5.70
 -15   5   9   10.80    7.30
 -15   5   9    8.10    5.50
 -13  -5   9   -1.70    6.20
 -13  -5   9    0.50    6.20
  13  -5  -9    0.60    6.80
 -13   5   9  -10.40    6.40
 -13   5   9   -4.20    4.90
 -13   5   9    5.90    5.60
  11  -5  -9    0.30    5.70
 -11  -5   9   -2.20    6.30
 -11   5   9    7.70    7.20
 -11   5   9    4.60    5.20
 -11   5   9    2.10    5.00
  -9  -5   9   -4.20    6.10
   9  -5  -9    5.70    6.20
  -9  -5   9    5.10    6.60
  -9   5   9   -0.40    5.30
  -9   5   9    6.60    6.70
  -9   5   9   12.00    5.00
  -7  -5   9   35.20    7.60
   7  -5  -9   30.70    5.00
  -7  -5   9   29.40    8.50
   7  -5  -9   32.90    8.10
  -7   5   9   31.90    7.30
  -7   5   9   27.90    6.80
  -7   5   9   19.80    8.20
  -5  -5   9   54.49   10.40
   5  -5  -9   42.80    6.00
   5  -5  -9   45.10    9.10
  -5  -5   9   40.80    8.90
  -5   5   9   46.50    8.40
   5   5  -9   30.80    5.30
  -5   5   9   32.00    8.70
  -5   5   9   39.00    7.40
  -3  -5   9  121.79   11.60
   3  -5  -9  105.09   12.50
   3  -5  -9  104.79    8.00
  -3  -5   9  103.79   12.00
  -3   5   9   95.19   11.30
  -3   5   9  117.89   10.80
   3   5  -9  111.09    9.00
  -3   5   9  111.79   10.40
   1  -5  -9   23.70    8.70
  -1  -5   9   12.50    7.80
   1  -5  -9   32.30    6.10
  -1  -5   9   26.80    7.40
  -1   5   9   21.60    8.10
  -1   5   9   33.90    7.30
   1   5  -9   29.90    4.00
  -1   5   9   34.20    8.10
   1  -5   9   30.70    8.30
   1  -5   9   16.00    8.90
  -1  -5  -9   15.70    7.20
  -1  -5  -9   16.20    5.50
   1   5   9   29.20    7.10
   1   5   9   22.50    8.00
   1   5   9   33.10    8.00
  -3  -5  -9   -6.90    5.90
   3  -5   9    7.90    7.30
  -3  -5  -9    1.60    4.80
   3   5   9   -5.30    4.90
   3   5   9   -3.00    5.70
   3   5   9    1.30    6.60
   5  -5   9    6.10    6.90
   5  -5   9   -4.10    5.10
  -5  -5  -9    1.10    5.60
  -5  -5  -9    4.70    6.90
   5   5   9    8.00    7.40
   5   5   9    5.40    6.60
   5   5   9   -6.90    5.70
  -7  -5  -9   10.10    7.60
  -7  -5  -9    8.60   14.20
   7  -5   9   10.70    6.80
   7   5   9   20.40    6.60
   7   5   9    8.20    7.20
   7   5   9    8.30    7.20
  -9  -5  -9   -3.80    6.50
   9   5   9    3.00    7.50
   9   5   9   -2.60    7.30
   9   5   9   10.70    8.50
 -34   0  10  182.18   16.30
 -34   0  10  201.88   14.40
 -32   0  10   -6.40    5.60
 -32   0  10    5.30    6.30
 -30   0  10   -5.80    5.30
 -30   0  10    1.00    4.90
 -28   0  10   78.99    9.90
 -28   0  10   77.39    9.50
 -26   0  10    9.20    5.10
 -26   0  10   10.80    5.60
 -24   0  10   91.29    9.00
 -24   0  10   96.79    9.00
 -22   0  10   19.40    5.60
 -22   0  10   18.50    5.30
 -20   0  10   66.69    7.40
 -20   0  10   67.49    7.70
 -18   0  10  362.46   14.70
 -16   0  10   65.39    7.10
  16   0 -10   52.49    5.60
 -16   0  10   66.39    6.90
  14   0 -10  136.29    7.40
 -14   0  10  146.99    8.50
 -14   0  10  148.69    8.80
 -12   0  10  113.09    7.60
  12   0 -10  104.99    6.70
 -12   0  10  108.19    7.10
  12   0 -10  118.39    9.70
  12   0 -10  101.69    5.40
  10   0 -10  108.49    6.20
 -10   0  10  108.99    6.90
 -10   0  10  101.29    7.10
  -8   0  10  103.99    5.60
   8   0 -10  110.99    6.10
  -8   0  10  109.29    7.10
  -8   0  10  108.89    6.60
   8   0 -10  106.29    6.40
   6   0 -10   74.39    8.50
  -6   0  10   68.19    5.50
   6   0 -10   71.19    5.40
  -6   0  10   79.29    5.90
   6   0 -10   70.19    3.60
  -6   0  10   74.89    4.60
   4   0 -10    1.30    2.70
  -4   0  10    6.70    3.20
  -4   0  10    3.10    2.40
   4   0 -10    1.90    1.70
  -4   0  10    4.60    3.10
   4   0 -10    4.90    2.50
   2   0 -10   24.60    4.00
  -2   0  10   30.60    3.40
  -2   0  10   28.90    4.30
   2   0 -10   39.80    4.60
   2   0 -10   20.00    3.80
   2   0 -10   29.40    4.30
   2   0 -10   26.30    3.00
  -2   0  10   29.90    3.90
   0   0 -10  339.67   12.10
   0   0  10  322.17   12.00
   0   0 -10  318.27   11.60
   0   0  10  334.17   11.90
   0   0 -10  302.77   11.60
   0   0  10  311.37   10.60
   0   0 -10  306.87   10.40
   2   0  10  530.65   16.40
   2   0  10  551.14   17.80
  -2   0 -10  535.35   17.50
   2   0  10  525.65   17.30
  -2   0 -10  536.95   17.70
  -2   0 -10  530.65   17.30
  -2   0 -10  516.95   16.30
  -2   0 -10  555.04   19.70
   4   0  10   14.30    3.50
  -4   0 -10   11.80    3.60
  -4   0 -10   11.40    4.30
   4   0  10   13.40    3.70
  -4   0 -10   10.00    3.60
   4   0  10   11.50    3.40
  -4   0 -10   12.00    3.10
  -6   0 -10  378.06   14.10
  -6   0 -10  385.86   14.40
   6   0  10  405.76   13.70
   6   0  10  402.26   15.80
   6   0  10  387.46   13.90
  -6   0 -10  391.66   14.30
  -6   0 -10  380.66   13.30
  -8   0 -10   -1.60    3.40
  -8   0 -10    3.40    3.70
  -8   0 -10    6.00    4.20
   8   0  10   -4.30    4.90
   8   0  10    5.10    3.20
   8   0  10    2.50    3.50
 -10   0 -10    5.30    3.70
  10   0  10   -0.60    3.20
 -10   0 -10    5.90    3.50
  10   0  10    5.00    3.30
 -10   0 -10    2.30    3.70
 -10   0 -10    2.50    3.60
 -10   0 -10   -2.60    3.50
 -12   0 -10   38.20    5.90
 -12   0 -10   40.60    5.90
 -12   0 -10   47.70    6.10
  12   0  10   41.70    5.40
  12   0  10   32.90    5.00
 -12   0 -10   40.30    5.50
 -14   0 -10   69.39    7.70
 -14   0 -10   62.79    7.40
  14   0  10   73.29    6.50
 -14   0 -10   61.89    7.30
  14   0  10   65.79    5.80
 -14   0 -10   66.99    7.70
 -16   0 -10  114.99   10.80
 -16   0 -10  134.59    9.70
 -16   0 -10  116.59    9.30
  16   0  10  124.39    8.00
 -16   0 -10  118.19    9.60
 -18   0 -10   31.30    6.60
 -18   0 -10   49.20    8.40
 -20   0 -10   87.89    9.70
 -20   0 -10   90.29   10.30
 -22   0 -10   22.70    6.80
 -22   0 -10   21.00    6.30
 -24   0 -10   -4.70    7.30
 -24   0 -10   -0.20    5.80
 -33  -1  10    7.40    6.10
 -33  -1  10    5.90    6.90
 -33   1  10    6.70    7.10
 -31  -1  10   22.00    6.60
 -31  -1  10    2.70    6.60
 -31   1  10    4.00    5.60
 -31   1  10    6.20    6.20
 -29  -1  10    6.90    5.60
 -29  -1  10   -1.20    5.70
 -29  -1  10    2.50    3.70
 -29   1  10   -7.50    4.60
 -29   1  10    1.00    5.60
 -27  -1  10   97.69    6.50
 -27  -1  10  110.49   10.00
 -27  -1  10   90.69   10.70
 -27   1  10  106.49    9.50
 -25  -1  10    6.80    3.30
 -25  -1  10   10.90    5.20
 -25  -1  10    1.40    4.80
 -25   1  10    0.30    4.70
 -25   1  10   10.00    5.50
 -23  -1  10   13.80    4.80
 -23  -1  10   15.80    3.90
 -23  -1  10   23.40    6.10
 -23   1  10   14.60    5.60
 -23   1  10   24.20    6.00
 -21  -1  10   48.60    4.90
 -21  -1  10   45.20    7.50
 -21  -1  10   38.90    6.50
 -21   1  10   45.10    6.70
 -21   1  10   50.79    6.90
 -19  -1  10  402.06   16.40
 -19  -1  10  380.86   14.80
 -19  -1  10  373.66   12.80
 -19  -1  10  387.16   15.70
 -19   1  10  401.06   15.70
 -19   1  10  387.16   16.00
 -17  -1  10   -3.30    2.70
 -17  -1  10    2.80    3.20
 -17  -1  10    3.30    4.00
 -17  -1  10    2.00    3.80
  17   1 -10    4.80    3.30
 -17   1  10    0.00    4.00
 -17   1  10    8.70    4.40
  17   1 -10    2.00    3.40
 -15  -1  10  100.99    7.30
 -15  -1  10   95.79    6.50
 -15  -1  10   87.99    7.30
 -15  -1  10   93.59    5.30
  15   1 -10   88.59    6.60
 -15   1  10   81.19    7.70
  15   1 -10  100.09    7.20
 -15   1  10   95.39    7.40
  15   1 -10   83.79    6.10
  13  -1 -10   59.29    6.30
 -13  -1  10   50.09    5.80
 -13  -1  10   44.00    4.30
 -13  -1  10   45.70    4.50
 -13  -1  10   57.49    6.30
 -13   1  10   52.29    6.40
 -13   1  10   58.09    6.50
  13   1 -10   49.20    5.70
  13   1 -10   54.19    6.20
  11  -1 -10   53.29    4.90
 -11  -1  10   53.99    5.00
 -11  -1  10   58.89    4.50
 -11  -1  10   49.90    5.70
  11  -1 -10   59.19    5.40
 -11  -1  10   57.39    6.00
  11   1 -10   53.19    5.70
 -11   1  10   56.99    6.20
  11   1 -10   60.59    5.40
 -11   1  10   54.29    6.30
 -11   1  10   63.19    6.60
  -9  -1  10  482.85   14.90
  -9  -1  10  491.75   16.50
  -9  -1  10  487.65   16.20
   9  -1 -10  483.55   16.10
  -9   1  10  467.45   16.80
   9   1 -10  480.55   16.10
  -9   1  10  472.95   16.10
  -9   1  10  470.75   16.40
   9   1 -10  491.05   16.60
   7  -1 -10   -3.30    2.30
   7  -1 -10   -2.10    2.30
  -7  -1  10    0.40    2.70
  -7  -1  10   -3.20    2.60
   7  -1 -10   -2.20    2.90
  -7  -1  10   -0.70    2.40
   7  -1 -10   -5.00    2.60
   7   1 -10   -1.00    2.10
   7   1 -10   -2.20    2.80
  -7   1  10    1.00    3.20
  -7   1  10   -2.80    3.00
  -7   1  10    0.80    3.20
  -5  -1  10  424.86   13.60
   5  -1 -10  427.06   14.80
  -5  -1  10  422.96   14.30
  -5  -1  10  419.96   13.90
   5  -1 -10  406.86   14.50
   5  -1 -10  411.96   14.70
  -5   1  10  419.86   15.20
   5   1 -10  405.96   14.00
   5   1 -10  416.86   14.50
  -5   1  10  418.16   14.30
  -5   1  10  418.46   14.80
   3  -1 -10   95.09    6.30
   3  -1 -10   96.19    6.10
  -3  -1  10   93.69    5.50
  -3  -1  10   91.19    5.40
  -3  -1  10   92.19    5.50
   3  -1 -10   93.39    6.40
   3  -1 -10   92.89    6.20
  -3   1  10   92.99    6.70
  -3   1  10   79.39    6.20
  -3   1  10   86.39    6.10
   3   1 -10   94.09    6.10
   1  -1 -10  173.88    8.10
   1  -1 -10  156.78    8.20
  -1  -1  10  165.78    7.20
   1  -1 -10  165.78    8.50
   1  -1 -10  165.08    8.40
   1  -1 -10  163.58    7.60
   1   1 -10  167.58    8.10
  -1   1  10  173.08    8.80
  -1   1  10  163.98    8.40
   1   1 -10  166.28    7.60
  -1   1  10  174.78    8.40
   1  -1  10   32.10    3.90
  -1  -1 -10   34.70    4.60
  -1  -1 -10   31.10    4.70
   1  -1  10   32.10    4.20
  -1  -1 -10   32.70    4.80
  -1  -1 -10   31.10    4.30
  -1  -1 -10   31.60    4.60
   1   1  10   30.10    5.10
  -1   1 -10   30.90    4.10
   1   1  10   43.00    5.30
  -1   1 -10   21.70    4.00
   1   1  10   31.50    4.70
  -3  -1 -10   -5.90    5.10
  -3  -1 -10    6.30    3.50
  -3  -1 -10    4.20    3.50
   3  -1  10    1.80    2.30
  -3  -1 -10    2.60    3.60
   3  -1  10    4.30    2.50
   3   1  10    0.90    3.10
   3   1  10    2.30    3.70
  -3   1 -10    7.00    3.00
  -3   1 -10    4.80    3.00
  -3   1 -10    1.00    3.00
  -3   1 -10    1.70    2.80
   3   1  10    2.40    3.50
  -5  -1 -10  153.38    8.90
  -5  -1 -10  161.88    8.70
  -5  -1 -10  164.18    8.70
   5  -1  10  164.68    7.20
   5  -1  10  161.38    7.00
  -5  -1 -10  173.28    9.10
  -5  -1 -10  171.88    8.20
  -5   1 -10  169.48    8.20
  -5   1 -10  157.58    7.80
  -5   1 -10  153.08    7.80
   5   1  10  163.18    8.90
   5   1  10  168.08    8.90
   5   1  10  156.08    9.10
  -5   1 -10  159.98    8.10
  -7  -1 -10  165.18    9.10
  -7  -1 -10  167.68    9.70
   7  -1  10  176.38    7.40
  -7  -1 -10  180.58    9.70
  -7  -1 -10  177.08    9.50
  -7   1 -10  177.58    8.80
  -7   1 -10  179.78    8.40
   7   1  10  172.08    9.30
  -7   1 -10  189.38    8.90
   7   1  10  173.28    9.60
  -7   1 -10  160.78    7.20
  -7   1 -10  177.68    8.30
   7   1  10  174.28    9.50
   9  -1  10  927.51   27.10
  -9  -1 -10  911.81   29.80
  -9  -1 -10  955.50   29.80
  -9  -1 -10  956.40   29.50
  -9   1 -10  963.80   28.20
   9   1  10  947.81   29.90
  -9   1 -10  892.11   29.40
   9   1  10  939.31   29.20
  -9   1 -10  955.40   28.60
  -9   1 -10  937.91   28.70
   9   1  10  972.60   29.60
  -9   1 -10  852.01   27.20
 -11  -1 -10    1.80    3.90
 -11  -1 -10   -2.50    4.10
 -11   1 -10    3.00    3.80
  11   1  10    3.40    3.80
 -11   1 -10    1.90    3.30
  11   1  10   -4.70    3.40
 -11   1 -10    3.20    3.70
 -11   1 -10    4.70    3.00
 -11   1 -10    2.70    3.40
  11   1  10    0.90    4.40
 -13  -1 -10   19.70    5.40
 -13  -1 -10   29.60    6.20
 -13  -1 -10   25.90    6.30
  13   1  10   22.50    5.80
  13   1  10   26.80    5.50
 -13   1 -10   32.20    5.10
 -13   1 -10   29.50    5.50
 -13   1 -10   17.50    4.40
 -13   1 -10   29.70    5.50
  13   1  10   25.00    6.20
 -15  -1 -10   49.90    7.20
 -15  -1 -10   51.79    7.50
 -15   1 -10   43.90    6.60
  15   1  10   50.39    6.70
 -15   1 -10   45.70    6.20
 -15   1 -10   54.39    6.70
 -15   1 -10   58.59    6.30
 -17  -1 -10   10.30    5.60
  17   1  10   10.30    4.90
  17   1  10   12.60    5.00
 -17   1 -10   23.60    6.60
 -17   1 -10   10.60    4.70
 -19  -1 -10   25.10    6.80
 -19  -1 -10   36.80    7.70
 -19   1 -10   31.60    6.00
 -19   1 -10   31.20    6.80
  19   1  10   17.40    5.00
  19   1  10   28.10    5.80
 -21  -1 -10    5.60    6.40
 -21  -1 -10   -2.80    5.90
 -21   1 -10    0.30    5.40
 -21   1 -10   11.50    5.70
 -23  -1 -10    4.80    6.20
 -23  -1 -10   10.10    6.10
 -23   1 -10   12.70    5.70
 -23   1 -10   11.40    6.60
 -32  -2  10  -10.10    6.80
 -32  -2  10    4.70    6.70
 -32  -2  10    5.60    4.60
 -32   2  10    5.80    6.20
 -32   2  10   -5.20    5.70
 -30  -2  10   -3.20    4.30
 -30  -2  10   -2.00    6.10
 -30  -2  10    3.80    7.10
 -30   2  10   -5.60    5.60
 -30   2  10    8.10    6.50
 -28  -2  10   -4.20    4.00
 -28  -2  10   -3.80    6.20
 -28   2  10   -1.30    5.60
 -28   2  10   -3.80    5.40
 -26  -2  10   18.80    4.80
 -26  -2  10   14.30    6.10
 -26  -2  10   12.30    5.80
 -26   2  10   11.40    5.90
 -26   2  10   18.40    6.30
 -24  -2  10    4.50    5.30
 -24  -2  10    4.20    4.00
 -24  -2  10    8.90    5.20
 -24   2  10   12.60    5.90
 -22  -2  10   36.70    6.50
 -22  -2  10   49.60    7.70
 -22  -2  10   36.20    6.10
 -22   2  10   39.60    7.10
 -22   2  10   45.20    7.00
 -20  -2  10   61.19    6.40
 -20  -2  10   54.39    6.90
 -20  -2  10   55.89    7.50
 -20   2  10   54.89    7.40
 -20   2  10   60.79    8.00
 -18  -2  10   38.20    5.90
  18  -2 -10   45.40    5.50
 -18  -2  10   39.00    5.40
 -18  -2  10   47.30    5.20
  18  -2 -10   39.80    5.70
 -18  -2  10   38.20    5.90
  18   2 -10   36.40    5.80
 -18   2  10   32.70    6.30
 -18   2  10   46.10    6.90
 -16  -2  10    4.70    3.80
 -16  -2  10    5.20    3.40
  16  -2 -10    4.90    3.60
 -16  -2  10    4.60    3.80
  16  -2 -10    2.50    3.70
  16  -2 -10    4.20    3.30
 -16  -2  10   -7.90    3.50
  16   2 -10    7.40    3.70
 -16   2  10    2.40    4.20
 -16   2  10    4.00    4.20
  16   2 -10    5.80    3.90
 -16   2  10    7.10    4.70
 -14  -2  10   53.49    6.40
  14  -2 -10   55.59    5.90
  14  -2 -10   54.99    6.70
 -14  -2  10   52.09    5.90
 -14  -2  10   66.39    6.00
 -14   2  10   41.30    6.70
 -14   2  10   47.20    6.10
  14   2 -10   46.50    5.80
 -14   2  10   55.59    6.90
  14   2 -10   47.20    6.50
 -12  -2  10  180.38    9.00
 -12  -2  10  189.08    9.10
 -12  -2  10  182.38    9.70
  12  -2 -10  199.88    9.20
  12  -2 -10  191.38    9.30
 -12   2  10  190.28   10.20
 -12   2  10  186.08   10.50
 -12   2  10  201.18   10.00
  12   2 -10  191.18    9.40
  12   2 -10  196.98    9.80
  10  -2 -10  485.55   16.50
 -10  -2  10  463.95   16.40
 -10  -2  10  479.15   16.00
 -10  -2  10  485.35   16.00
  10  -2 -10  487.15   16.70
 -10   2  10  485.75   17.10
 -10   2  10  446.76   17.20
  10   2 -10  482.35   17.00
 -10   2  10  475.85   17.50
  10   2 -10  464.75   16.30
  -8  -2  10  553.44   17.70
  -8  -2  10  523.95   17.30
   8  -2 -10  534.15   18.10
   8  -2 -10  552.74   18.40
   8   2 -10  542.45   18.40
  -8   2  10  533.15   19.00
   8   2 -10  524.85   17.80
  -8   2  10  560.04   18.80
  -8   2  10  562.64   19.50
  -6  -2  10  224.08    9.00
   6  -2 -10  227.98   10.40
  -6  -2  10  229.08    9.40
  -6  -2  10  244.78   10.10
   6  -2 -10  225.18   10.30
  -6   2  10  243.78   11.30
   6   2 -10  240.68    9.80
   6   2 -10  237.08   10.20
  -6   2  10  253.97   11.60
  -6   2  10  243.78   10.90
  -4  -2  10  215.78    9.60
  -4  -2  10  201.08    8.20
   4  -2 -10  217.28    9.80
   4  -2 -10  210.98    9.80
   4   2 -10  229.98    9.30
  -4   2  10  203.98   10.40
  -4   2  10  227.58   10.30
   4   2 -10  207.48    8.80
  -2  -2  10    7.10    2.70
   2  -2 -10    7.30    3.80
  -2  -2  10   11.60    2.50
  -2  -2  10    9.80    3.90
   2  -2 -10   12.70    3.80
  -2   2  10   16.80    4.60
  -2   2  10    9.80    4.30
   2   2 -10   10.50    2.80
   2   2 -10   13.60    3.50
  -2   2  10   10.60    4.40
   0  -2 -10   93.49    6.90
   0  -2  10  100.99    7.00
   0  -2  10   97.59    4.30
   0  -2 -10   93.39    7.00
   0   2 -10   99.99    5.90
   0   2  10   94.09    7.80
   0   2  10   95.69    7.40
   0   2 -10   95.59    5.60
   0   2  10   87.09    8.00
  -2  -2 -10   37.40    5.40
  -2  -2 -10   43.30    5.90
   2  -2  10   33.30    5.10
  -2   2 -10   33.80    4.40
   2   2  10   35.10    6.10
   2   2  10   51.59    7.70
  -2   2 -10   41.30    4.50
   2   2  10   39.70    5.70
  -2   2 -10   41.90    4.10
   2   2  10   37.40    6.00
  -2   2 -10   36.00    4.20
  -4  -2 -10   23.60    5.10
  -4  -2 -10   17.90    4.60
  -4   2 -10   21.60    3.70
  -4   2 -10   23.10    3.80
   4   2  10   18.40    5.20
   4   2  10   19.90    4.80
   4   2  10   30.50    5.00
  -4   2 -10   26.50    3.50
  -4   2 -10   21.10    3.70
   4   2  10   24.40    5.40
  -6  -2 -10   68.39    7.00
  -6  -2 -10   70.19    7.20
   6   2  10   73.09    7.30
  -6   2 -10   71.89    5.40
   6   2  10   73.89    8.00
  -6   2 -10   62.49    5.00
  -6   2 -10   67.39    5.40
  -6   2 -10   68.09    5.40
   6   2  10   68.09    7.60
  -8  -2 -10   32.70    6.00
  -8  -2 -10   23.00    5.40
   8   2  10   38.00    6.40
   8   2  10   48.20    7.50
  -8   2 -10   31.90    4.10
  -8   2 -10   32.20    4.50
  -8   2 -10   37.00    4.50
  -8   2 -10   37.10    4.60
 -10  -2 -10  295.77   13.80
 -10  -2 -10  298.57   13.70
 -10   2 -10  278.87   11.50
  10   2  10  304.67   14.50
 -10   2 -10  286.97   11.60
 -10   2 -10  309.17   11.40
  10   2  10  273.17   13.40
 -10   2 -10  287.97   11.00
  10   2  10  296.37   15.80
 -12  -2 -10    8.60    5.00
 -12  -2 -10   11.20    5.30
 -12   2 -10   10.70    3.50
  12   2  10    7.90    5.50
 -12   2 -10   15.50    4.00
  12   2  10    4.50    4.60
 -12   2 -10    4.50    3.90
 -12   2 -10   12.60    4.30
  12   2  10    6.90    4.80
 -12   2 -10   10.10    4.00
 -14  -2 -10  101.99    9.70
 -14  -2 -10   92.69    9.20
 -14   2 -10   88.99    7.30
  14   2  10   77.79    9.10
 -14   2 -10   89.49    7.60
 -14   2 -10   87.99    6.50
  14   2  10   95.29    8.80
  14   2  10   83.09    9.30
 -14   2 -10  101.59    7.40
 -16  -2 -10    1.40    6.90
 -16  -2 -10   -3.40    4.70
  16   2  10    1.30    5.50
 -16   2 -10    2.80    3.70
 -16   2 -10    9.40    8.10
 -16   2 -10    4.40    4.60
  16   2  10    2.00    5.00
  16   2  10    3.60    4.50
 -16   2 -10    3.60    4.10
 -18  -2 -10    1.90    5.20
 -18  -2 -10   -7.30    8.00
  18   2  10   -2.50    4.90
 -18   2 -10    6.40    4.60
 -18   2 -10    9.30    5.10
 -18   2 -10   15.50    4.70
  18   2  10    4.40    5.60
 -20  -2 -10    1.50    5.90
 -20  -2 -10   -1.50    5.90
  20   2  10   -0.60    5.20
  20   2  10   11.90    5.80
 -20   2 -10    1.30    4.80
 -20   2 -10   -3.50    4.30
 -22  -2 -10    1.60    6.30
 -22  -2 -10   -0.20    6.10
 -22   2 -10   -9.40    6.00
 -22   2 -10    2.40    5.50
 -29  -3  10    1.20    6.50
 -29  -3  10  -23.20    7.70
 -29   3  10    6.50    7.40
 -29   3  10    3.00    8.10
 -27  -3  10   -0.10    6.80
 -27  -3  10   -2.50    5.40
 -27  -3  10    1.50    6.20
 -27   3  10    2.00    6.00
 -27   3  10    2.90    5.60
 -27   3  10   -2.30    5.70
 -25  -3  10   28.20    6.80
 -25   3  10   29.20    6.70
 -25   3  10   19.60    6.30
 -25   3  10   29.90    7.70
 -23  -3  10   88.09    8.80
 -23  -3  10   98.99    9.40
 -23  -3  10   87.99    8.70
 -23   3  10   85.99    9.40
 -23   3  10   99.09    9.80
 -23   3  10   99.39   11.20
  21  -3 -10   -0.60    5.80
 -21  -3  10    0.60    4.10
 -21  -3  10    4.30    4.00
 -21  -3  10    4.90    4.80
 -21  -3  10    4.80    4.40
 -21   3  10    9.90    5.30
 -21   3  10    6.40    5.70
 -21   3  10    0.30    6.10
  19  -3 -10  127.59    7.40
 -19  -3  10  156.58    9.90
  19  -3 -10  167.58    8.80
 -19  -3  10  158.58    9.60
 -19  -3  10  154.28    9.70
  19  -3 -10  169.28    8.80
 -19  -3  10  157.48    9.80
  19   3 -10  149.19   11.70
 -19   3  10  174.48   10.80
 -19   3  10  191.78   13.70
 -19   3  10  160.48   12.30
 -17  -3  10    7.20    4.50
  17  -3 -10   -0.20    3.60
 -17  -3  10    2.00    3.50
 -17  -3  10   -0.60    4.30
 -17  -3  10    3.90    3.60
  17  -3 -10   14.20    4.40
  17  -3 -10    1.10    3.20
 -17   3  10    4.80    4.60
 -17   3  10    0.10    4.70
 -17   3  10    8.80    5.80
  17   3 -10    1.80    5.00
 -15  -3  10   60.79    7.20
  15  -3 -10   58.79    6.70
  15  -3 -10   48.80    5.20
 -15  -3  10   57.79    7.00
 -15  -3  10   48.00    5.80
 -15  -3  10   51.89    5.80
  15  -3 -10   51.19    5.30
  15   3 -10   46.20    6.50
 -15   3  10   50.29    7.70
 -15   3  10   51.49    7.10
  15   3 -10   48.40    6.30
 -15   3  10   43.10    6.80
 -13  -3  10   58.39    6.90
 -13  -3  10   53.09    5.90
  13  -3 -10   45.60    5.30
  13  -3 -10   42.40    5.10
 -13  -3  10   36.60    6.20
 -13  -3  10   47.70    5.50
  13  -3 -10   56.09    6.50
 -13   3  10   44.90    6.80
 -13   3  10   49.70    7.40
 -13   3  10   49.10    7.10
  13   3 -10   40.30    7.90
  13   3 -10   35.90    5.90
 -11  -3  10   54.99    7.20
 -11  -3  10   69.29    7.20
  11  -3 -10   57.99    5.80
  11  -3 -10   50.59    6.50
 -11  -3  10   49.99    5.30
 -11   3  10   48.70    7.00
 -11   3  10   49.10    6.70
  11   3 -10   51.39    6.10
  11   3 -10   45.50    5.60
 -11   3  10   37.30    6.90
  -9  -3  10    4.80    4.60
  -9  -3  10   -2.90    4.50
   9  -3 -10   -0.20    3.30
   9  -3 -10    0.50    2.50
  -9  -3  10    5.60    2.80
   9   3 -10    0.00    3.00
   9   3 -10    5.80    3.50
  -9   3  10   -7.20    4.60
  -9   3  10    0.20    4.30
  -9   3  10   -0.40    4.00
  -7  -3  10   46.60    4.10
   7  -3 -10   45.40    5.70
  -7  -3  10   47.40    7.00
  -7  -3  10   43.10    6.60
   7  -3 -10   40.30    5.20
  -7   3  10   44.00    6.30
  -7   3  10   45.50    6.80
  -7   3  10   49.20    7.60
   7   3 -10   41.80    4.90
   7   3 -10   47.20    5.60
  -5  -3  10   -1.40    4.70
   5  -3 -10    0.30    3.40
  -5  -3  10    5.10    4.40
   5  -3 -10    3.80    3.60
  -5   3  10    2.90    4.50
   5   3 -10    5.90    3.30
  -5   3  10   -2.40    3.90
  -5   3  10   -2.20    4.10
   5   3 -10    2.70    2.90
   3  -3 -10   29.60    5.20
  -3  -3  10   17.20    5.80
  -3  -3  10   14.90    5.30
   3  -3 -10   15.60    4.50
  -3   3  10   24.40    5.90
   3   3 -10   23.70    3.80
   3   3 -10   23.60    4.30
  -3   3  10   20.20    5.00
  -3   3  10   12.30    5.10
  -1  -3  10   39.70    6.00
   1  -3 -10   34.30    5.30
  -1  -3  10   41.00    6.70
   1  -3 -10   42.50    6.30
  -1   3  10   41.20    7.20
   1   3 -10   32.20    4.70
  -1   3  10   36.80    6.50
   1   3 -10   42.80    4.50
  -1   3  10   35.30    6.00
  -1  -3 -10  109.99    8.00
   1  -3  10   93.89    8.60
  -1  -3 -10   96.89    7.80
   1   3  10  118.19    9.10
  -1   3 -10  102.79    5.70
  -1   3 -10  112.19    6.30
   1   3  10   98.79    9.50
   1   3  10  106.89    9.10
   1   3  10  121.59    9.40
   3  -3  10   -2.70    4.00
  -3  -3 -10    0.50    4.10
  -3  -3 -10    3.40    4.20
  -3   3 -10    1.30    2.60
  -3   3 -10    4.70    2.80
  -3   3 -10    6.90    3.10
   3   3  10    0.50    4.00
   3   3  10    4.50    4.80
   3   3  10    5.30    4.80
   3   3  10    4.70    5.10
  -5  -3 -10   74.79    8.00
  -5  -3 -10   68.89    7.50
   5  -3  10   70.09    7.50
  -5   3 -10   68.19    5.30
   5   3  10   80.99    8.90
  -5   3 -10   65.99    5.30
   5   3  10   74.39    8.20
   5   3  10   68.49    8.40
  -7  -3 -10    8.10    4.40
  -7  -3 -10   10.40    5.20
   7   3  10    3.10    4.70
  -7   3 -10    7.20    2.90
   7   3  10    1.10    4.40
  -7   3 -10    6.60    2.70
   7   3  10    9.60    5.80
  -9  -3 -10   -1.10    4.60
  -9  -3 -10    1.10    4.30
   9   3  10   -3.70    4.60
  -9   3 -10    1.00    2.80
   9   3  10    8.20    5.50
  -9   3 -10    4.30    2.70
   9   3  10   -2.00    5.50
 -11  -3 -10   41.80    7.10
 -11  -3 -10   37.70    7.20
  11   3  10   37.70    9.90
 -11   3 -10   43.80    4.50
 -11   3 -10   41.80    4.80
  11   3  10   54.99    8.50
  11   3  10   51.59    8.40
 -13  -3 -10   16.50    6.10
 -13  -3 -10   27.20    6.60
  13   3  10   21.20    7.60
  13   3  10   18.00    6.80
 -13   3 -10   24.20    4.80
  13   3  10   24.10    6.90
 -15  -3 -10   -8.40    5.70
 -15   3 -10    4.30    3.60
  15   3  10    7.40    6.20
  15   3  10   -3.40    5.20
 -15   3 -10    4.80    3.10
  15   3  10   -4.70    5.50
 -17  -3 -10    5.00    6.20
 -17  -3 -10   22.70    6.70
  17   3  10   14.70    6.80
  17   3  10   16.40    7.20
 -17   3 -10    8.90    4.30
 -17   3 -10   19.70    3.90
  17   3  10   -0.80    5.40
 -19  -3 -10   35.70    8.00
 -19  -3 -10   46.80    8.80
  19   3  10   26.00   10.70
  19   3  10   43.20    8.60
 -19   3 -10   39.40    5.80
  19   3  10   29.20    7.70
 -24  -4  10   79.59    8.60
 -24  -4  10   98.29    9.90
 -24   4  10   81.59   10.20
 -22  -4  10   10.80    7.00
  22  -4 -10   21.30    5.10
 -22  -4  10    2.70    4.70
 -22   4  10   14.20    6.10
 -22   4  10   16.90    7.60
 -22   4  10    5.00    5.30
  20  -4 -10  227.28   17.20
 -20  -4  10  229.48   13.00
 -20  -4  10  232.08   12.40
 -20   4  10  218.98   12.10
 -20   4  10  204.78   14.20
 -20   4  10  214.78   12.90
 -18  -4  10    1.80    4.30
 -18  -4  10    3.50    5.80
 -18  -4  10   -1.40    5.20
  18  -4 -10    2.90    5.70
 -18   4  10    1.10    5.30
 -18   4  10    3.20    6.40
 -18   4  10    0.60    4.60
 -16  -4  10    9.30    6.30
  16  -4 -10    2.50    4.50
 -16  -4  10    6.90    6.10
 -16  -4  10    9.30    4.70
 -16   4  10    7.70    5.40
 -16   4  10   -2.70    6.40
 -16   4  10    2.30    4.80
 -14  -4  10   -1.80    4.70
  14  -4 -10    5.70    4.80
 -14  -4  10    5.70    5.60
 -14   4  10    6.00    5.30
 -14   4  10   -4.10    5.80
 -14   4  10    3.00    5.00
  12  -4 -10   21.10    6.00
  12  -4 -10   28.60    4.40
 -12  -4  10   38.00    7.40
 -12  -4  10   31.90    7.50
 -12   4  10   25.10    7.70
 -12   4  10   27.30    6.70
  12   4 -10   21.60    5.50
 -12   4  10   30.00    6.60
  10  -4 -10    2.10    4.80
 -10  -4  10    5.10    5.80
  10  -4 -10    2.30    3.40
  10  -4 -10    9.10    3.80
 -10  -4  10    8.10    5.10
  10   4 -10   12.40    4.60
 -10   4  10    2.90    8.80
 -10   4  10    4.00    6.40
 -10   4  10    8.00    7.40
  10   4 -10    6.90    4.70
   8  -4 -10   13.20    4.30
   8  -4 -10   10.10    5.30
  -8  -4  10    9.60    5.70
  -8  -4  10   10.30    6.10
   8   4 -10    8.50    4.30
   8   4 -10   11.50    4.70
  -8   4  10    0.20    6.70
  -6  -4  10   18.10    6.10
   6  -4 -10   15.30    6.10
   6  -4 -10   15.60    3.90
   6  -4 -10   16.40    4.30
   6  -4 -10   22.10    4.30
  -6  -4  10   17.90    6.60
  -6   4  10   18.30    7.80
   6   4 -10   20.10    4.70
  -6   4  10   17.10    6.20
  -6   4  10   21.30    7.20
   6   4 -10   19.10    4.20
   4  -4 -10   -4.20    5.20
   4  -4 -10   -0.30    3.20
  -4  -4  10    1.90    5.60
   4  -4 -10    5.40    3.70
   4  -4 -10    1.90    4.00
  -4  -4  10   -6.90    5.00
   4   4 -10    6.90    3.50
  -4   4  10   -2.10    6.30
   4   4 -10    0.60    3.70
  -4   4  10   -8.00    4.80
  -4   4  10   -5.20    4.30
   2  -4 -10    7.00    4.00
  -2  -4  10    3.70    5.30
  -2  -4  10    3.90    6.10
   2  -4 -10    5.50    3.90
   2  -4 -10    4.20    3.30
  -2   4  10   -3.40    8.00
   2   4 -10   12.50    3.90
  -2   4  10    0.70    5.30
   0  -4  10   13.70    7.10
   0  -4 -10    6.60    4.30
   0  -4  10    2.50    5.60
   0   4  10    5.10    5.40
   0   4 -10   14.20    3.70
  -2  -4 -10   29.50    5.40
   2  -4  10   26.60    7.60
   2  -4  10   23.10    6.60
  -2  -4 -10   22.70    5.40
   2   4  10   11.90    7.10
   2   4  10   26.10    7.50
   2   4  10    4.50    5.20
  -4  -4 -10    3.50    4.70
  -4  -4 -10    7.60    5.30
   4  -4  10   -0.40    5.20
   4   4  10   -1.10    5.40
   4   4  10    3.10    6.40
  -6  -4 -10    6.00    4.80
   6  -4  10   -1.10    4.80
  -6  -4 -10   -1.50    4.90
   6   4  10   -1.00    5.30
   6   4  10    2.80    6.30
   6   4  10   -0.50    5.70
  -8  -4 -10   14.40    5.00
  -8  -4 -10   15.90    5.90
   8   4  10   17.00    7.10
   8   4  10    9.20    6.00
   8   4  10    8.80    6.20
 -10  -4 -10   40.30   13.80
 -10  -4 -10   28.50    7.20
  10   4  10   10.70    7.70
  10   4  10   32.00    7.50
  10   4  10   17.50    7.50
 -12  -4 -10    8.20    6.80
 -12  -4 -10   17.40    6.40
  12   4  10   21.90    7.70
  12   4  10    9.90    6.60
  12   4  10   18.40    7.00
 -14  -4 -10   -4.30    7.60
 -14  -4 -10    5.40    7.10
  14   4  10    1.40    6.80
  14   4  10    1.90    5.80
  14   4  10   -4.90    5.90
 -16  -4 -10   10.20    7.40
  16   4  10   -6.10    5.90
  17  -5 -10   -2.00    6.20
 -17  -5  10   -4.10    6.60
 -17  -5  10  -11.40    6.20
 -17   5  10   10.70    7.30
 -17   5  10    1.70    5.50
 -17   5  10    8.40    9.90
 -15  -5  10   13.00    7.50
 -15  -5  10   26.30    7.10
  15  -5 -10   10.00    6.80
 -15   5  10   16.00    6.20
  13  -5 -10   29.20    7.50
 -13  -5  10   16.50    6.70
 -13  -5  10   30.30    7.80
[truncated: 181,873 more chars]
